# Supplementary material for: Biodiversity and community structures across the Magellan seamounts and abyssal plains in the western Pacific Ocean revealed by environmental DNA metabarcoding analysis
Source: Frontiers journal article supplement (doi:10.3389/fmars.2024.1412678), 2024-06-25
Supplement: Data_Sheet_1.xlsx [file Data_Sheet_1.xlsx]

## Sheet: Table S1
Supplementary Table 1. The location and physical parameters of seawater collection sites in the western Pacific
Locality	Station	Longitude (E)	Latitude (N)	Depth (m)	Water temperature (℃)	Salinity (psu)
KC-2	S1	151.795	19.87010	1350	2.92	34.55
				2000	2.07	34.61
				3000	1.63	34.66
				3488	1.52	34.70
	S2	151.82217	19.71448	1350	3.00	34.56
				2000	2.06	34.63
				3000	1.60	34.67
				4163	1.48	34.69
	S3	151.83572	19.57268	1350	2.89	34.57
				2000	2.04	34.63
				3000	1.62	34.67
				3950	1.49	34.69
	S4	151.68362	19.55685	1350	2.92	34.56
				2000	2.09	34.62
				3000	1.61	34.67
				3450	1.54	34.68
	S5	151.52182	19.53552	1350	2.97	34.55
				2000	2.09	34.62
				3000	1.58	34.67
				3360	1.54	34.68
	S6	151.50012	19.68057	1350	2.96	34.56
				2000	2.04	34.62
				3000	1.59	34.67
				3085	1.59	34.67
	S7	151.49898	19.83947	1350	2.93	34.56
				2000	2.12	34.62
				3000	1.62	34.67
				4335	1.48	34.69
	S8	151.64335	19.85847	1350	2.91	34.56
				2000	2.11	34.61
				3000	1.61	34.67
				3480	1.53	34.68
	S9	151.66210	19.70622	1302	2.95	34.56
	S10	151.57743	19.77759	1350	3.02	34.55
				2000	2.05	34.62
				3000	1.61	34.67
				3360	1.54	34.68
	S11	151.75556	19.63764	1350	2.98	34.56
				2000	2.11	34.62
				3000	1.64	34.67
				3340	1.56	34.68
KC-8	S12	149.88230	16.68155	1550	2.86	34.58
				2000	2.12	34.63
				3000	1.62	34.67
				4600	1.47	34.70
Abyssal plain	AP1	149.57322	17.30320	5272	1.50	34.70
	AP2	150.17381	18.07443	5365	1.49	34.70
	AP3	150.34957	18.75228	5405	1.50	34.70

## Sheet: Table S2
Supplementary Table 2. Summary of total ASV number and alpha diversity indices in each water sample including Shannon–Wiener index (H') and Pielou's evenness (J') calculated using normalized 16S and 18S ASV counts
Sample	16S				18S
	No. of ASV	Shannon–Wiener (H')	Pielou's evenness (J')		No. of ASV	Shannon–Wiener (H')	Pielou's evenness (J')
S1_T	942	6.47	0.94		229	5.15	0.95
S2_T	967	6.47	0.94		224	5.17	0.95
S3_T	757	6.26	0.94		533	5.94	0.95
S4_T	271	5.29	0.95		247	4.9	0.89
S5_T	544	5.98	0.95		246	5.04	0.92
S6_T	663	6.14	0.94		355	5.58	0.95
S7_T	843	6.33	0.94		365	5.59	0.95
S8_T	929	6.38	0.93		441	5.68	0.93
S9_T	594	6.04	0.95		467	5.78	0.94
S10_T	758	6.26	0.94		413	5.64	0.94
S11_T	825	6.31	0.94		191	4.76	0.91
S12_T	915	6.44	0.94		460	5.76	0.94
S1_2K	1164	6.7	0.95		293	5.22	0.92
S2_2K	829	6.41	0.95		286	5.41	0.96
S3_2K	1036	6.58	0.95		517	5.95	0.95
S4_2K	482	5.9	0.96		524	5.94	0.95
S5_2K	780	6.36	0.95		530	5.9	0.94
S6_2K	582	6.09	0.96		662	6.12	0.94
S7_2K	924	6.42	0.94		396	5.66	0.95
S8_2K	663	6.1	0.94		402	5.63	0.94
S10_2K	1090	6.65	0.95		594	6.03	0.94
S11_2K	1062	6.6	0.95		407	5.66	0.94
S12_2K	578	6.04	0.95		428	5.76	0.95
S1_3K	977	6.55	0.95		352	5.55	0.95
S2_3K	811	6.39	0.95		230	5.12	0.94
S3_3K	1174	6.7	0.95		328	5.39	0.93
S4_3K	715	6.27	0.95		506	5.73	0.92
S5_3K	443	5.83	0.96		456	5.81	0.95
S6_3K	673	6.21	0.95		626	5.97	0.93
S7_3K	918	6.49	0.95		447	5.66	0.93
S8_3K	701	6.15	0.94		258	5.24	0.94
S10_3K	410	5.74	0.95		516	5.81	0.93
S11_3K	727	6.29	0.95		575	5.99	0.94
S12_3K	848	6.41	0.95		361	5.62	0.96
S1_BT	904	6.48	0.95		227	5.19	0.96
S2_BT	1092	6.63	0.95		314	5.24	0.91
S3_BT	801	6.36	0.95		224	5.18	0.96
S4_BT	398	5.73	0.96		401	5.52	0.92
S5_BT	598	6.09	0.95		276	5.02	0.89
S6_BT	731	6.3	0.95		612	6.04	0.94
S7_BT	980	6.54	0.95		440	5.75	0.94
S8_BT	973	6.49	0.94		440	5.71	0.94
S10_BT	870	6.44	0.95		502	5.8	0.93
S11_BT	883	6.46	0.95		353	5.23	0.89
S12_BT	881	6.39	0.94		444	5.71	0.94
AP1_BT	607	6.05	0.94		308	5.16	0.9
AP2_BT	696	6.15	0.94		306	4.98	0.87
AP3_BT	868	6.3	0.93		361	5.39	0.92
T, summit depth; 2K, 2,000 m; 3K, 3,000 m; BT, bottom depth

## Sheet: Table S3
Supplementary Table 3. Proportions of prokaryotic ASVs in the Magellan seamounts and adjacent abyssal plains identified by eDNA metabarcoding analysis
No.	Kindom	Phylum	Class	S1_T	S1_2K	S1_3K	S1_BT	S2_T	S2_2K	S2_3K	S2_BT	S3_T	S3_2K	S3_3K	S3_BT	S4_T	S4_2K	S4_3K	S4_BT	S5_T	S5_2K	S5_3K	S5_BT	S6_T	S6_2K	S6_3K	S6_BT	S7_T	S7_2K	S7_3K	S7_BT	S8_T	S8_2K	S8_3K	S8_BT	S9_T	S10_T	S10_2K	S10_3K	S10_BT	S11_T	S11_2K	S11_3K	S11_BT	S12_T	S12_2K	S12_3K	S12_BT	AP1_BT
ASV1	Bacteria	Pseudomonadota	Unclassified Pseudomonadota	18.5968	17.1258	18.2689	13.4219	18.1902	19.2828	18.2449	14.1551	17.4692	18.4728	17.1518	12.5403	29.0489	25.9527	21.0571	20.1485	22.1782	22.3345	22.4435	17.5042	23.0588	22.8258	22.6738	19.0362	17.7203	22.0353	19.555	11.1879	22.1079	24.3402	24.5346	24.0486	24.4124	26.0754	23.5388	25.2358	18.3934	23.8756	19.5172	21.6638	21.0209	23.7403	20.3443	19.1043	8.4011	4.47466
ASV2	Bacteria	Pseudomonadota	Alphaproteobacteria	7.59688	9.24866	8.24515	7.07381	7.68869	8.10485	8.0678	8.46948	8.14003	8.86058	9.47119	8.57411	2.07534	3.47335	6.73359	3.77317	4.90088	6.41664	4.21916	5.10121	6.75105	4.8487	5.81043	6.45707	4.65081	6.80173	7.36816	7.36686	6.29108	3.86551	5.44195	6.70477	5.07042	4.9604	7.03624	4.43162	6.85608	6.89805	5.31374	5.59379	6.46809	6.97222	4.98246	4.1504	6.48019	4.9214
ASV3	Archaea	Methanobacteriota	Unclassified Methanobacteriota	2.93739	2.30271	0.310338	0.0421598	4.99956	1.34219	0.859196	0.0644407	4.7659	2.2112	0.20412	0.0375235	4.17975	1.23677	0.161836	0.351401	3.82135	2.23492	1.08734	0.242915	5.10738	1.95781	0.86881	0.141061	3.60311	8.67119	0.34959	0	6.11279	5.74774	7.40044	5.54667	5.14047	5.25944	1.9093	0.384715	0.121301	8.55531	1.42817	0.245626	0.103154	5.55143	2.43471	0.191716	0	0
ASV4	Bacteria	Pseudomonadota	Alphaproteobacteria	2.5606	2.54617	2.26807	2.30524	2.32467	2.30911	2.50734	2.50129	2.53179	2.59913	2.56337	3.15947	2.28462	2.46056	2.58527	1.91953	2.06353	2.30654	1.98114	2.01238	2.72117	2.11453	2.49836	2.38041	1.8812	2.09633	1.99046	2.64271	2.22274	2.28642	2.13637	1.88148	2.13059	2.28878	1.97798	2.11963	2.1185	2.42661	1.38459	1.81207	2.15979	1.99371	2.04342	1.49573	2.39009	2.12987
ASV5	Bacteria	Chloroflexota	Chloroflexia	2.39874	2.40552	1.56536	0.380944	2.32685	2.78586	2.99908	0.538327	2.6917	2.88645	1.16776	0.136961	3.62167	3.39544	1.39097	1.12009	3.34846	3.13182	3.3148	1.52655	3.12875	2.56781	2.65517	0.927477	2.15445	2.39354	1.76685	0	1.91711	2.40728	2.35225	2.53355	2.59922	2.46459	2.51482	1.22813	0.840566	2.57845	2.12438	1.19337	0.610867	2.61011	2.86369	1.08294	0	0
ASV6	Bacteria	Pseudomonadota	Gammaproteobacteria	2.55131	1.21052	0	1.26028	0	0	0	5.88393	0.465507	0.569773	2.64597	0.178236	0.110452	0.081153	0.655536	0.184486	3.22188	0.244164	0.408192	12.4434	2.89606	0.0216998	0.0678095	3.96205	0	0.0113438	0.0409429	0.00484901	0.320334	0.154541	0	1.75267	0.0966254	0.253031	0.431538	0.358821	1.75118	0.912509	14.446	0.222454	0.193414	1.24175	1.5159	2.72721	3.41577	1.22431
ASV7	Bacteria	Chloroflexota	Chloroflexia	0.0676635	0.295841	1.56126	3.02045	0.0492514	0.384851	0.381865	2.48344	0.049084	0.345501	1.34245	5.44465	0	0.499903	2.49104	3.16261	0.0955338	0.185565	0.615807	1.67659	0	0.547318	0.885762	2.59552	0.0631643	0	1.57158	5.84306	0	0	0	0.0609525	0.106288	0.0640794	0.510519	2.02345	2.79164	0.033261	0.338604	1.89549	3.05917	0.0485958	0.298542	1.95862	6.18563	7.31207
ASV8	Bacteria	Actinomycetota	Unclassified Actinomycetota	2.67602	1.13874	0.105269	0	2.10905	0.909474	0.871805	0	2.5587	0.674029	0.0655084	0	5.90048	1.33416	0.081942	0	3.55147	1.61962	1.1542	0	3.76162	1.07776	0.928143	0.067004	3.15684	4.0191	0.0771617	0	5.43686	4.87399	5.22089	3.03727	3.79738	3.64431	1.32323	0.0850812	0.0358778	3.38973	1.29295	0	0	2.90552	1.25793	0.0518153	0	0
ASV9	Bacteria	Pseudomonadota	Unclassified Pseudomonadota	1.77384	1.52964	1.60501	1.19704	1.43376	2.07552	1.90933	1.27196	1.51052	1.8063	1.75544	1.42402	1.29055	1.85029	1.47291	1.41439	1.36374	1.22408	1.81223	1.598	1.15161	1.60579	1.53631	1.73858	1.54752	1.19563	1.41726	1.73716	1.50861	1.11547	1.13295	1.46861	1.65229	1.4804	1.62542	1.64614	1.27281	1.34056	1.40247	1.73097	1.0396	1.275	1.57677	1.18657	1.17611	2.32064
ASV10	Archaea	Methanobacteriota	Unclassified Methanobacteriota	0.19503	0.683829	2.71238	3.23877	0.276902	0.852033	0.653854	2.53202	0.273921	1.25956	2.88427	2.97936	0.197651	0.866714	2.09567	2.80242	0	0.708077	0.879724	1.58133	0.115605	1.34539	1.30321	1.83556	0.21009	0.201919	3.62975	2.60877	0	0	0	0.202408	0.142522	0.236601	1.02562	1.84219	3.00007	0.245842	0.639213	2.60225	4.12939	0.27495	1.21736	3.36108	2.27438	1.39335
ASV11	Bacteria	Chloroflexota	Chloroflexia	1.78446	1.24738	0.84762	0.463758	1.60997	1.53749	1.52026	0.417377	1.73377	1.39534	0.878192	0.148218	3.48797	2.19762	1.04476	0.970746	2.45283	1.98099	2.18875	0.914503	2.21873	1.87824	1.52148	0.893975	1.81803	1.92504	0.86925	0.0484901	1.7349	2.0447	1.96194	1.78487	1.98324	1.8353	1.71013	1.03577	0.683387	1.88142	1.60027	1.12154	0.606031	1.79677	1.84053	0.749594	0	0
ASV12	Bacteria	Chloroflexota	Chloroflexia	1.19937	1.09995	1.49017	1.00882	1.09995	1.82661	1.69137	0.928937	1.05451	1.56506	1.36808	0.592871	1.68004	2.58067	1.74946	2.1743	1.32314	1.83774	2.43508	1.72898	1.33687	1.87583	2.02793	1.5023	1.08752	0.876875	1.77157	0.877672	0.3556	0.77865	0.70982	0.970639	1.22231	1.32759	1.46631	1.66093	1.42144	1.10051	1.42594	1.71011	1.28782	1.24942	1.7043	1.37829	0.177784	0
ASV13	Bacteria	Pseudomonadota	Gammaproteobacteria	1.08394	1.25805	0.935116	0.642937	0.809912	1.07031	1.09336	0.699925	1.02126	0.859509	0.994019	0.806754	0.947564	1.01279	0.798935	0.817008	0.974445	0.962008	1.00992	0.833532	0.798862	1.23207	0.983238	0.807575	0.92824	0.967625	0.714927	0.835243	0.921817	0.746949	0.818625	0.98789	1.11844	1.0187	0.98212	0.780528	0.898654	0.877802	0.921942	1.06593	0.728527	0.966801	0.910119	0.50779	0.686942	1.0432
ASV14	Bacteria	Chloroflexota	Chloroflexia	0.727051	0.832234	0.910508	0.938055	0.638079	0.942023	0.880811	1.06674	0.701427	0.96134	0.842115	1.14071	0.965004	1.11342	1.18201	1.13327	0.745164	1.07432	0.848054	0.966897	0.901128	1.00784	0.968405	0.881632	0.701672	0.795199	1.19994	1.07284	0.695526	0.822238	0.85662	0.930388	0.932435	0.857678	0.927177	0.839714	1.31039	0.710051	0.776666	1.11227	1.1621	0.860658	0.86954	1.05358	1.08985	0.878994
ASV15	Bacteria	Pseudomonadota	Alphaproteobacteria	0.461704	0.610111	1.13882	1.14283	0.379783	0.934365	0.954663	1.25312	0.633342	0.877693	1.00446	1.42777	0.575514	0.902422	1.25166	1.33093	0.563649	0.769932	1.24569	1.05978	0.50392	0.894515	1.09343	1.2431	0.527284	0.493455	1.22986	1.43046	0.309558	0.420035	0.430037	0.49797	0.669131	0.593145	0.924887	0.832316	1.30356	0.555315	0.811309	1.23045	1.07667	0.686736	0.918814	0.99658	1.30025	0.869334
ASV16	Bacteria	Pseudomonadota	Alphaproteobacteria	0.826556	0.787615	0.704071	0.843196	0.914981	0.735238	0.707891	0.92398	0.785344	0.739493	0.855407	1.00938	0.680153	0.47718	0.72109	0.817008	0.530213	0.582739	0.598212	0.488211	0.781076	0.520796	0.767095	0.823444	0.60418	0.724868	0.66926	1.10436	0.777814	0.677603	0.70982	0.74063	0.830978	0.742664	0.644445	0.684349	0.584296	0.81128	0.538638	0.567721	0.683397	0.776255	0.521724	0.400705	1.14981	1.12289
ASV17	Bacteria	Chloroflexota	Chloroflexia	0.084911	0.32591	0.97613	1.82793	0.0623851	0.38868	0.453915	1.66852	0.0601675	0.35035	1.05858	2.0788	0	0.428488	1.43603	2.02056	0	0.253931	0.577099	1.29555	0.0578026	0.50874	0.73531	1.59752	0.0576717	0	1.23931	2.32995	0	0	0	0.098904	0.0628065	0.0755808	0.391475	1.44638	1.84514	0	0.236911	1.17252	1.63596	0.0575477	0.344918	1.19002	2.01454	1.63483
ASV18	Bacteria	Pseudomonadota	Unclassified Pseudomonadota	0.254733	0.547063	0.888634	0.929021	0.206856	0.618442	0.682674	0.961653	0.21217	0.568561	0.907624	1.16135	0.110452	0.639486	0.897265	0.953176	0.193456	0.369502	0.767119	0.697785	0.173408	0.597951	0.705643	0.821681	0.167523	0.172426	0.867676	1.78322	0.0195923	0.0752893	0	0.23806	0.222238	0.202097	0.401777	1.12825	0.946491	0.12726	0.420182	1.09837	0.871976	0.228912	0.579693	0.639055	1.24028	2.86397
ASV19	Bacteria	Chloroflexota	Dehalococcoidia	0.241466	0.488865	0.951522	1.188	0.357893	0.428889	0.563791	1.48015	0.357838	0.590382	1.15732	1.41839	0.0988257	0.321366	1.11236	0.575419	0.193456	0.522512	0.19002	0.659681	0.388315	0.248342	0.540357	1.3154	0.270508	0.252966	1.07869	1.58805	0.196902	0.162466	0.179614	0.339264	0.195666	0.269462	0.531123	0.765731	1.19934	0.257411	0.45706	0.797127	1.45867	0.303085	0.292745	1.16239	1.22976	0.632682
ASV20	Bacteria	Pseudomonadota	Deltaproteobacteria	0.362199	0.559673	0.765592	0.853736	0.329437	0.513135	0.686276	0.983464	0.44809	0.637661	0.712997	0.91182	0.249971	0.421996	0.727235	0.685232	0.367805	0.542045	0.598212	0.478685	0.383869	0.614828	0.788286	0.715885	0.409195	0.360732	0.678708	0.994048	0.309558	0.368521	0.447308	0.437018	0.466217	0.441984	0.650168	0.902601	0.920864	0.454085	0.51964	0.975553	0.818787	0.452709	0.51013	0.621783	0.7974	0.876579
ASV21	Bacteria	Actinomycetota	Acidimicrobiia	0.437823	0.577132	0.44295	0.502906	0.262674	0.199127	0.194535	0.476861	0.289754	0.152748	0.279123	0.761726	0.395303	0.285659	0.462972	0.6457	0.31765	0.361363	0.235766	0.281019	0.420922	0.670283	0.464072	0.384392	0.44215	0.269982	0.362188	1.21831	0.399683	0.196148	0.191703	0.448518	0.444477	0.617791	0.596369	0.40691	0.526208	0.318149	0.436945	0.563087	0.554454	0.337613	0.127533	0.224533	1.35074	2.85673
ASV22	Bacteria	Chloroflexota	Chloroflexia	0.379446	0.674129	0.918711	0.838679	0.383066	0.718006	0.992489	0.744537	0.433839	0.783135	0.965537	0.73546	0.494129	0.843991	0.981256	1.36168	0.451397	0.677149	1.05215	0.943082	0.456492	0.759494	1.068	0.968032	0.395463	0.24616	1.06924	0.493387	0.180249	0.281344	0.326414	0.330063	0.417905	0.453485	0.718848	1.02837	0.910613	0.35141	0.576633	1.01958	0.788163	0.47317	0.765195	0.647691	0.330321	0.149719
ASV23	Bacteria	Pseudomonadota	Gammaproteobacteria	0.165842	0	0	0	0.0131337	0	0	0	0	2.51791	0	0	0	0	0	0	0	0	0	0	0	0	0	0	0	0	0	0	0	0	0	0	0	0.223456	0	0	0	0	0	0.25953	0	0.644534	1.35358	3.29027	7.55636	3.6826
ASV24	Bacteria	Pseudomonadota	Unclassified Pseudomonadota	0.64214	0.857453	0.758756	0.301141	0.639173	1.20433	1.11497	0.431257	0.661843	1.00619	0.846862	0.185741	0.552261	0.993313	0.827614	0.59299	0.563649	0.725982	1.09438	0.771612	0.32162	0.976492	1.01079	0.76702	0.506687	0.374345	0.69603	0.132136	0.346783	0.313045	0.367863	0.645176	0.669131	0.570142	0.86422	0.913698	0.509123	0.406363	0.818014	0.827251	0.427123	0.690572	0.936205	0.471519	0.0241955	0
ASV25	Bacteria	Pseudomonadota	Alphaproteobacteria	0.0822576	0.489835	0.97613	1.06152	0.149943	0.327411	0.545779	1.3136	0.144085	0.476427	0.985474	1.64916	0	0	0.991499	0.267943	0.0358252	0.24742	0.182983	0.700167	0.050392	0.262809	0.506453	0.841077	0	0.0340314	0.970033	1.41349	0	0	0	0.0885536	0	0.0657225	0.339965	0.540081	0.968701	0.0795372	0.240264	0.753099	1.03799	0.135557	0.121736	0.742685	1.27815	0.920045
ASV26	Bacteria	Unclassified Bacteria	Unclassified Bacteria	0.781447	0.675099	0.410139	0.254464	0.734393	0.830972	0.652053	0.259745	0.894596	0.751615	0.525966	0.268293	1.49401	0.65247	0.465021	0.746728	0.716503	0.625061	0.647477	0.483448	0.963377	0.643761	0.544595	0.356179	0.60418	0.61143	0.407855	0.164866	0.527032	0.64194	0.751269	0.679678	0.700534	0.553712	0.45672	0.436504	0.392947	0.804049	0.44365	0.481984	0.335251	0.75963	0.814469	0.367888	0.138861	0
ASV27	Bacteria	Unclassified Bacteria	Unclassified Bacteria	0.766853	0.454916	0.337681	0.20327	0.679669	0.788849	0.698885	0.224055	0.72201	0.635236	0.365518	0.236398	0.680153	0.7531	0.397419	0.298691	0.711727	0.563206	0.654515	0.359609	0.420922	0.556962	0.631476	0.326204	0.561613	0.713524	0.489741	0.106678	0.922797	0.691472	0.751269	0.726829	0.867213	0.819888	0.499073	0.454999	0.34511	0.694143	0.491703	0.498204	0.304627	0.656044	0.782586	0.350617	0	0
ASV28	Bacteria	Chloroflexota	Chloroflexia	0.445783	0.467525	0.664425	0.505917	0.389633	0.507391	0.76373	0.573026	0.389506	0.589169	0.58293	0.36773	0.604581	0.415503	0.573594	0.461214	0.44662	0.620178	0.471532	0.61205	0.520224	0.571429	0.612405	0.737044	0.319941	0.501395	0.771617	0.343068	0.390866	0.384372	0.449035	0.425517	0.410658	0.50442	0.55974	0.63256	0.669719	0.446855	0.585573	0.593211	0.697903	0.489795	0.556506	0.594148	0.190408	0
ASV29	Bacteria	Pseudomonadota	Alphaproteobacteria	0.721744	0.481105	0.438848	0.280061	0.570222	0.631845	0.567394	0.209184	0.752094	0.569773	0.309503	0.255159	0.842925	0.555087	0.313428	0.320654	0.683067	0.53879	0.598212	0.445344	0.687703	0.556962	0.42381	0.306808	0.487463	0.746421	0.357463	0.160017	0.574054	0.667697	0.803081	0.593424	0.729521	0.668726	0.527689	0.395813	0.264812	0.762111	0.401185	0.368439	0.241768	0.631746	0.495638	0.283257	0.105198	0.166622
ASV30	Bacteria	Chloroflexota	Chloroflexia	0.604991	0.355979	0.345884	0.212305	0.510025	0.465268	0.466524	0.214141	0.340421	0.335802	0.328491	0.0994371	1.06964	0.629747	0.487555	0.535887	0.70695	0.446007	0.622845	0.428673	0.621008	0.48704	0.504333	0.402024	0.483344	0.596683	0.332268	0.0690984	0.870877	0.727136	0.870436	0.472669	0.550765	0.655581	0.388041	0.381016	0.257979	0.655098	0.396715	0.412467	0.38844	0.487237	0.347816	0.259076	0	0
ASV31	Bacteria	Pseudomonadota	Alphaproteobacteria	0.294535	0.387018	0.430646	0.408046	0.32287	0.622272	0.554785	0.514534	0.419589	0.469153	0.513624	0.390244	1.41844	0.587548	0.512138	0.527102	0.463339	0.462285	0.489127	0.354846	0.297906	0.479807	0.404738	0.440816	0.383105	0.233682	0.393682	0.50551	0.207678	0.344746	0.255604	0.290962	0.64739	0.313825	0.33882	0.651056	0.384405	0.423717	0.330782	0.484301	0.352981	0.326104	0.579693	0.37307	0.416583	0.499867
ASV32	Bacteria	Unclassified Bacteria	Unclassified Bacteria	0.318416	0.347249	0.415607	0.337278	0.305359	0.526537	0.507953	0.333109	0.573175	0.540678	0.40919	0.521576	0.767353	0.736869	0.532623	0.61056	0.685455	0.608783	0.869167	0.397714	0.366083	0.607595	0.519167	0.32973	0.352896	0.266579	0.418878	0.385497	0.262537	0.530987	0.468032	0.262211	0.64739	0.571785	0.296468	0.643658	0.437368	0.443962	0.270436	0.389294	0.317522	0.297969	0.707226	0.265985	0.239851	0.323586
ASV33	Bacteria	Pseudomonadota	Gammaproteobacteria	0.302496	0.468495	0.676729	0.499895	0.215612	0.710347	0.59081	0.431257	0.239087	0.533404	0.664578	0.378987	0.139519	0.529118	0.673973	0.667662	0.308096	0.377641	0.615807	0.471541	0.179336	0.542495	0.599691	0.51311	0.194985	0.152007	0.623593	0.322459	0.120493	0.0851958	0.0846257	0.180557	0.285045	0.205383	0.438406	0.595568	0.640675	0.169197	0.481645	0.692851	0.486759	0.228912	0.504333	0.352344	0.198824	0.0821038
ASV34	Bacteria	Acidobacteriota	Unclassified Acidobacteriota	0.0782774	0.156165	0.705438	0.657994	0.0864635	0.310178	0.338635	0.606734	0.0870846	0.215786	0.493687	0.767355	0	0.438226	0.673973	0.737943	0	0.180682	0.615807	0.683496	0	0.332731	0.451357	0.918661	0.104358	0.0589877	0.689731	0.866761	0.0793488	0	0.100169	0.0966039	0	0.1183	0.2358	0.998779	0.722682	0	0.259261	0.994091	0.844576	0.0997493	0	0.827317	0.621719	0.3912
ASV35	Bacteria	Chloroflexota	Chloroflexia	0	0.0572282	0.341782	0.718222	0	0.0593551	0.109876	0.905143	0	0	0.34653	1.51407	0	0.107122	0.669876	0.795045	0	0	0	0.40724	0	0.106088	0.158929	0.59422	0	0	0.448798	1.45592	0	0	0	0	0	0	0.0904283	0.802723	0.910613	0	0.0514053	0.428687	0.841352	0	0	0.45252	1.35495	1.40784
ASV36	Bacteria	Actinomycetota	Unclassified Actinomycetota	0	0.209513	0.526345	0.623363	0	0.216359	0.223355	0.604751	0.0585842	0.189116	0.445267	0.677298	0	0.340843	0.661682	0.913643	0	0.195332	0.344852	0.61205	0.037053	0.28692	0.481024	0.627722	0.081015	0.032897	0.620443	0.81221	0	0	0	0.0770531	0.0845472	0	0.331952	0.743536	0.811522	0.0809834	0.249204	0.697486	0.818787	0.0792879	0.304339	0.687416	0.818439	0.719616
ASV37	Bacteria	Acidobacteriota	Unclassified Acidobacteriota	0.474971	0.510204	0.358188	0.105399	0.422467	0.620357	0.628636	0.196296	0.475007	0.580683	0.364568	0	0.523195	0.639486	0.272457	0	0.594698	0.537162	0.622845	0.350083	0.39869	0.547318	0.457714	0.313861	0.487463	0.302879	0.381084	0.0618249	0.298782	0.293232	0.227971	0.454268	0.68604	0.427196	0.501362	0.36252	0.216975	0.352856	0.696206	0.345267	0.262721	0.500026	0.788383	0.221078	0	0
ASV38	Bacteria	Pseudomonadota	Gammaproteobacteria	0.163188	0	0	0	0	0	0	0	5.56708	0.0691001	0	0	0	0	0	0	0	0	1.22106	0	0	0	0	0	7.84473	0.0521814	0	0	0	0	0	0	0	0	0	1.16894	0	0	0	0	0	0	0	0	0.132549	0.243897
ASV39	Bacteria	Chloroflexota	Dehalococcoidia	0.222891	0.345309	0.684932	0.453218	0.194817	0.587807	0.53317	0.46199	0.286587	0.497036	0.540207	0.262664	0	0.723885	0.739527	0.834578	0.174349	0.491584	0.791752	0.728745	0.198604	0.388186	0.519167	0.804048	0.203224	0.0453751	0.740123	0.23154	0	0.0713267	0.0500846	0.170207	0.222238	0.174165	0.500217	0.625162	0.596255	0.141721	0.442532	0.625652	0.509324	0.319709	0.504333	0.59933	0.0894182	0
ASV40	Bacteria	Pseudomonadota	Deltaproteobacteria	0.378119	0.465585	0.42381	0.218327	0.284564	0.520793	0.488139	0.246857	0.365755	0.384294	0.336087	0.213884	0.685967	0.613517	0.45273	0.426074	0.422737	0.403685	0.746006	0.607287	0.49651	0.600362	0.563667	0.402024	0.322687	0.309685	0.431476	0.151532	0.201801	0.334839	0.241788	0.297862	0.367176	0.358187	0.430393	0.614064	0.40149	0.310918	0.404537	0.34295	0.354593	0.359353	0.539115	0.445611	0.126237	0.0990075
ASV41	Bacteria	Pseudomonadota	Gammaproteobacteria	0.429862	0.534453	0.485331	0.225856	0.407145	0.693115	0.731308	0.282547	0.340421	0.617052	0.465205	0.227017	0.290664	0.65247	0.333914	0.320654	0.351087	0.410196	0.679147	0.378662	0.222318	0.515973	0.563667	0.384392	0.330926	0.218935	0.439349	0.233965	0.105798	0.160485	0.091534	0.303612	0.38167	0.253031	0.45672	0.388414	0.307524	0.315257	0.436945	0.324412	0.309463	0.453987	0.64346	0.347162	0.098886	0.0603704
ASV42	Bacteria	Pseudomonadota	Unclassified Pseudomonadota	0	0	0.0820277	0.399012	0	0	0	0.273625	0	0	0.069306	0.639775	0	0	0.157738	0.180093	0	0	0	0.0619195	0	0	0.0317857	0.149877	0	0	0.0692881	1.05587	0	0	0	0	0	0	0.0148806	0.173862	0.227226	0	0	0.122813	0.290121	0	0	0.157173	1.39177	3.88303
ASV43	Bacteria	Pseudomonadota	Gammaproteobacteria	0	0	0	0	10.7456	0	0	0	0	0	0	0	0	0	0	0	0	0	0	0	0	0	0	0	0	0	0	0	0	0	0	0	0	0	0	0	0	0	0	0	0	0	0	0	0	0
ASV44	Archaea	Methanobacteriota	Unclassified Methanobacteriota	0.411288	0.441336	0.125776	0	0.65778	0.348472	0.171119	0	0.581092	0.501885	0.160448	0	0.622021	0.282413	0.0696507	0	0.573203	0.330436	0.263917	0	0.666953	0.323086	0.214024	0.0652408	0.455881	0.880278	0.174795	0	0.480991	0.606277	0.718455	0.556623	0.599077	0.704873	0.45901	0	0.0427117	0.659436	0.249204	0.0903719	0	0.636861	0.457958	0	0	0
ASV45	Bacteria	Pseudomonadota	Alphaproteobacteria	0.561209	0.370528	0.162688	0.114434	0.570222	0.246994	0.291803	0.13483	0.636509	0.288523	0.145258	0.105066	0.406929	0.311628	0.145447	0	0.511106	0.343458	0	0.242915	0.49651	0.296564	0.241571	0.111086	0.414687	0.560383	0.160622	0.118801	0.733731	0.606277	0.60447	0.438168	0.466217	0.499491	0.293034	0.251544	0.155471	0.566884	0.214561	0.169158	0.0693068	0.441199	0.318831	0.117448	0.0767944	0.156963
ASV46	Bacteria	Pseudomonadota	Deltaproteobacteria	0.136654	0.186234	0.421076	0.56464	0.0744243	0.248909	0.315219	0.538327	0.112418	0.241244	0.427229	0.782364	0	0.21749	0.542866	0.676447	0.105087	0.172543	0.292068	0.412003	0.134873	0.335142	0.368714	0.543085	0.111224	0.065794	0.418878	0.712805	0.0362457	0	0.0656281	0.0966039	0.0869628	0.111728	0.195737	0.614064	0.514249	0.0954447	0.175448	0.407832	0.533501	0.126605	0.313034	0.411068	0.582796	0.548164
ASV47	Archaea	Methanobacteriota	Unclassified Methanobacteriota	0.233505	0.545123	0.233779	0.0376427	0.422467	0.35996	0.270188	0.0565095	0.432256	0.750403	0.229754	0	0	0.360319	0.106525	0	0.298543	0.390663	0.302625	0.154799	0.388315	0.602773	0.300905	0.0952163	0.336418	0.451483	0.357463	0	0.132248	0.223887	0.245242	0.543972	0.461386	0.430482	0.516243	0	0.112759	0.715835	0.363189	0.208551	0.111213	0.592102	0.802875	0.1589	0	0
ASV48	Bacteria	Pseudomonadota	Deltaproteobacteria	0.578456	0.338519	0.0601537	0.0331255	0.468435	0.132113	0.2882	0.0446128	0.498757	0.2073	0.0674072	0	0	0.165552	0	0	0.835921	0.376013	0.119642	0	0.795897	0.214587	0.158929	0.0440816	0.297971	0.649999	0.0818859	0.0169715	1.0139	0.669678	0.713274	0.547422	0.524193	0.532352	0.323939	0	0.051254	0.665221	0.303962	0	0.0660832	0.497468	0.211588	0	0	0
ASV49	Bacteria	Pseudomonadota	Alphaproteobacteria	0.168495	0.32203	0.427911	0.370404	0.137904	0.358045	0.426896	0.404489	0.22167	0.369746	0.394949	0.260788	0.203465	0.431734	0.532623	0.553457	0.188679	0.533906	0.387079	0.440581	0.216389	0.424352	0.510691	0.398498	0.223821	0.171291	0.497614	0.260634	0.0607361	0.0990648	0.0949881	0.210459	0.154601	0.147876	0.413223	0.325528	0.410032	0.19812	0.40789	0.447225	0.377158	0.249373	0.411582	0.367888	0.136757	0
ASV50	Bacteria	Actinomycetota	Unclassified Actinomycetota	0.432516	0.114456	0	0	0.35461	0.0440377	0.050435	0	0.329338	0.0363685	0	0	1.39519	0	0	0	0.819202	0.156265	0	0	0.665471	0.0892104	0	0	0.510807	0.908637	0	0	1.88772	1.2284	1.27802	0.509471	0.744015	0.680227	0.0869943	0	0	0.682574	0.0748729	0	0	0.273671	0	0	0	0
ASV51	Bacteria	Verrucomicrobiota	Unclassified Verrucomicrobiota	0.478951	0.452976	0.300768	0.144548	0.448735	0.448036	0.51876	0.153666	0.380005	0.35035	0.337985	0.120075	0.308104	0.223982	0.202807	0.0966353	0.308096	0.301136	0.38356	0.223863	0.27271	0.28692	0.224619	0.192196	0.411941	0.381151	0.256681	0.0594004	0.320334	0.293232	0.373044	0.301312	0.425152	0.404193	0.311348	0.473495	0.223809	0.387563	0.339722	0.169158	0.203085	0.387488	0.469552	0.151991	0	0
ASV52	Bacteria	Pseudomonadota	Alphaproteobacteria	0.301169	0.279351	0.258387	0.180685	0.277997	0.4825	0.237765	0.176468	0.335671	0.2764	0.190829	0.131332	0	0.798546	0.225341	0.676447	0.795319	0.519256	0.464494	0.195285	0.409065	0.438819	0.339048	0.232751	0.271881	0.342582	0.297624	0.0836455	0.352661	0.521081	0.493938	0.328913	0.490374	0.40255	0.194593	0	0.187931	0.358641	0.176566	0.215502	0.159567	0.277508	0.594186	0.172718	0.0746905	0
ASV53	Bacteria	Nitrospinota	Nitrospinia	0.473644	0.269652	0	0	0.47938	0.132113	0	0	0.606425	0.107893	0	0	0.778979	0	0	0	0.840697	0.320669	0.102048	0	0.711417	0.151899	0	0	0.57809	0.779318	0	0	1.02174	1.08575	1.12431	0.546272	0.586999	0.652295	0.18658	0	0	0.689805	0.0815779	0	0	0.388767	0.107243	0	0	0
ASV54	Archaea	Thermoproteota	Unclassified Thermoproteota	0	0.226003	0.668526	0.798025	0.175116	0.317837	0.180125	0.433239	0.071251	0.426724	0.616159	0.789869	0	0.357073	0.538769	0.412896	0	0.169287	0	0.285782	0	0.393008	0.307262	0.444343	0	0	0.440924	0.504297	0	0	0	0	0	0.0772239	0.23809	0	0.269938	0	0.153098	0.319778	0.462582	0	0	0.478428	0.578588	0.473304
ASV55	Bacteria	Actinomycetota	Unclassified Actinomycetota	0.20299	0.31621	0.460722	0.137019	0.190439	0.26997	0.313418	0.224055	0.201086	0.322467	0.308554	0.129456	0.31973	0.529118	0.385128	0.338224	0.253165	0.38578	0.66859	0.397714	0.226764	0.405063	0.618762	0.417894	0.247164	0.12705	0.508637	0.0545514	0.0421234	0.128784	0.136437	0.218509	0.275382	0.254675	0.519677	0.540081	0.471537	0.196674	0.467117	0.532963	0.444853	0.223797	0.47245	0.32989	0	0
ASV56	Bacteria	Gemmatimonadota	Gemmatimonadia	0.135327	0.182354	0.262489	0.242419	0.0995972	0.225932	0.237765	0.188365	0.0680843	0.147899	0.237349	0.333959	0.104639	0.31812	0.344157	0.351401	0.195844	0.149754	0.358927	0.221481	0.0993019	0.245931	0.307262	0.3456	0.192239	0.0918847	0.270853	0.523693	0.0744507	0.0931209	0.103623	0.131105	0.166679	0.126516	0.199171	0.651056	0.321192	0.109906	0.289434	0.512108	0.323969	0.135557	0.24637	0.219351	0.338737	0.944194
ASV57	Bacteria	Pseudomonadota	Unclassified Pseudomonadota	0.177782	0.32785	0.356821	0.362875	0.0963138	0.346557	0.282796	0.3341	0.171002	0.333378	0.386405	0.425891	0	0.266182	0.323671	0.377756	0.174349	0.126966	0.376522	0.300071	0.0711417	0.238698	0.269119	0.409077	0.144179	0.0487783	0.333842	0.509146	0	0	0.02936	0.151806	0.128029	0.10187	0.247247	0.395813	0.420283	0.151844	0.200034	0.280385	0.244991	0.136836	0.20869	0.246986	0.328217	0.548164
ASV58	Bacteria	Pseudomonadota	Alphaproteobacteria	0.06501	0.227943	0.228311	0.382449	0.159793	0.193383	0.147703	0.342031	0.166252	0.103044	0.231653	0.491557	0.505755	0.233721	0.352351	0.496354	0.0477669	0.156265	0.327257	0.32865	0.191193	0.130199	0.220381	0.546612	0.0741493	0.128185	0.343291	0.551575	0.107758	0.053495	0.0656281	0.102354	0.0893785	0.108442	0.265562	0.506788	0.343402	0.185105	0.130748	0.340633	0.293345	0.157297	0.307237	0.312619	0.554393	0.581971
ASV59	Bacteria	Pseudomonadota	Alphaproteobacteria	0.39006	0.289051	0.16679	0.0466769	0.413712	0.275714	0.38907	0.0674148	0.332505	0.295797	0.197475	0.0450281	0.38949	0.31812	0.145447	0.171308	0.372582	0.333691	0.35189	0.223863	0.409065	0.294153	0.292429	0.104033	0.333672	0.446945	0.225186	0	0.399683	0.423997	0.397223	0.348464	0.268135	0.410765	0.35599	0.173862	0.126427	0.416486	0.290551	0.141351	0.0934836	0.319709	0.327527	0.139901	0	0
ASV60	Bacteria	Pseudomonadota	Unclassified Pseudomonadota	0.39006	0.293901	0.207804	0.0346313	0.377594	0.390595	0.37466	0.0594837	0.340421	0.30792	0.185132	0	0.331357	0.41875	0.182321	0.0702802	0.444232	0.333691	0.506721	0.150036	0.275674	0.395419	0.279714	0.151641	0.328179	0.353926	0.141726	0	0.425153	0.328895	0.426583	0.340414	0.439645	0.349972	0.320505	0.173862	0.0700472	0.267534	0.320724	0.139034	0.0467418	0.393882	0.336222	0.0829044	0	0
ASV61	Bacteria	Pseudomonadota	Alphaproteobacteria	0.0119406	0	0	1.06453	0	0	0	1.19959	0	0	0	1.34897	0	0.0584302	0	2.43785	0	0.844809	0	0.871636	0	0.289331	0	0	0	0	0.00787364	0	0	0.73308	0	0.669327	0.253642	0	0	0	0	0	0	0.0486618	0.757539	0.0127884	1.03475	1.61836	0.10625	0
ASV62	Bacteria	Pseudomonadota	Gammaproteobacteria	0	0.182354	0.298034	0	0	0.0114881	1.22665	0	1.28568	0	0	0	0	0	0	0	0	0	0	0	0	0	0.720476	0	0.131821	0	0	0	0	0	0.0794446	0	0	0.027932	0	0	0	0	0	0	0	0	0.0405785	0	0.158849	0.0507112
ASV63	Bacteria	Pseudomonadota	Unclassified Pseudomonadota	0.127367	0.30457	0.430646	0.400518	0.0831801	0.382936	0.33143	0.308324	0.0585842	0.395204	0.387354	0.390244	0	0.366812	0.46707	0.513924	0.0573203	0.187193	0.355409	0.447726	0.0281602	0.291742	0.366595	0.419657	0.0576717	0.0238219	0.448798	0.368525	0	0	0	0.0724529	0.0773003	0.0476488	0.246102	0.421707	0.425408	0.033261	0.259261	0.472715	0.404558	0.086961	0.333324	0.390342	0.143069	0.125571
ASV64	Bacteria	Pseudomonadota	Gammaproteobacteria	0.161862	0.243462	0.419709	0.317704	0.17621	0.335069	0.347641	0.266685	0.106085	0.201239	0.355075	0.255159	0	0.21749	0.391273	0.465607	0.145689	0.141615	0.292068	0.378662	0.0770701	0.330319	0.228857	0.428473	0.101612	0.0782721	0.338567	0.326096	0	0	0.0690822	0.142606	0.159432	0.0952976	0.27243	0.36252	0.410032	0.0563991	0.267084	0.31746	0.412617	0.17648	0.234776	0.309164	0.200928	0.152133
ASV65	Bacteria	Planctomycetota	Unclassified Planctomycetota	0.197684	0.231823	0.267957	0.239407	0.206856	0.12254	0.226958	0.179442	0.228003	0.198814	0.245894	0.247655	0.342983	0.178537	0.29704	0.347009	0.30332	0.229515	0.193539	0.271493	0.305316	0.344786	0.2225	0.208065	0.170269	0.290401	0.258256	0.158805	0.249802	0.334839	0.322959	0.207008	0.272967	0.254675	0.165976	0.133171	0.358778	0.264642	0.146393	0.294288	0.241768	0.168807	0.136228	0.191716	0.0873142	0.224578
ASV66	Bacteria	Pseudomonadota	Unclassified Pseudomonadota	0.0782774	0.196904	0.288464	0.240913	0.0656685	0.229762	0.232361	0.29841	0.093418	0.212149	0.298111	0.341463	0.0697593	0.188275	0.208952	0.285513	0.0907571	0.0992936	0.228728	0.226244	0.0474278	0.200121	0.283952	0.218645	0.0796419	0.0408376	0.242508	0.492175	0.0176331	0.0356633	0.0189976	0.0885536	0.111119	0.0690086	0.182001	0.192357	0.326317	0.0404917	0.179918	0.31746	0.262721	0.0716149	0.162314	0.276348	0.338737	0.760667
ASV67	Archaea	Thermoproteota	Unclassified Thermoproteota	0.327704	0.205634	0.269324	0.173156	0.483758	0.256567	0.165715	0.130864	0.413256	0.358836	0.333238	0.189493	0.38949	0.282413	0.178224	0	0.33198	0.296253	0	0	0.434261	0.356841	0.173762	0.0969795	0.216955	0.317626	0.181094	0.116376	0.276251	0.32097	0.302235	0.277161	0.246395	0.318754	0.210618	0	0	0.355748	0.168743	0.139034	0.104766	0.328661	0	0.136447	0	0
ASV68	Bacteria	Actinomycetota	Acidimicrobiia	0.281268	0.0601381	0	0	0.210139	0	0	0	0.26442	0	0	0	0.802232	0	0	0	0.472892	0.100921	0	0	0.435743	0	0	0	0.341911	0.75663	0	0.0327308	1.87008	0.982723	1.08114	0.296712	0.449308	0.335185	0.104164	0	0	0.394794	0.0737554	0	0	0.235306	0	0	0	0
ASV69	Bacteria	Pseudomonadota	Gammaproteobacteria	0.327704	0.244432	0.221475	0.108411	0.232029	0.346557	0.365654	0.112028	0.23117	0.283674	0.25159	0.146341	0.249971	0.347335	0.23968	0.14056	0.281825	0.265325	0.292068	0.211955	0.177854	0.216998	0.349643	0.179853	0.212836	0.221204	0.188967	0.121225	0.211597	0.184261	0.22279	0.207008	0.299539	0.226742	0.273574	0.351422	0.206725	0.157628	0.213444	0.199282	0.167626	0.251931	0.382598	0.188262	0.0873142	0
ASV70	Bacteria	Pseudomonadota	Unclassified Pseudomonadota	0.0636833	0.157135	0.365023	0.51194	0.0361177	0.218274	0.257579	0.380696	0.0522507	0.157597	0.438621	0.56848	0.0348797	0.185029	0.405613	0.430466	0.0549319	0.0944103	0.260398	0.292927	0.0266781	0.202532	0.233095	0.42142	0.0411941	0.0533158	0.318095	0.530967	0.0068573	0.0455698	0.0328141	0.049452	0.0507283	0.0312182	0.182001	0.377317	0.526208	0.0231381	0.135218	0.419418	0.402946	0.0588265	0.147822	0.367888	0.246163	0.173867
ASV71	Bacteria	Pseudomonadota	Unclassified Pseudomonadota	0.436496	0.339489	0.0833949	0	0.341476	0.340813	0.31702	0.0277591	0.294504	0.277613	0.0873445	0	0.325544	0.357073	0	0	0.441844	0.353225	0.348371	0.111931	0.323102	0.380952	0.226738	0	0.348777	0.344851	0.0629892	0	0.339926	0.406166	0.433491	0.380665	0.359929	0.382833	0.22092	0	0.0529625	0.28055	0.263731	0.104275	0	0.386209	0.260862	0	0	0
ASV72	Bacteria	Pseudomonadota	Alphaproteobacteria	0.0238812	0.064018	0.318541	0.376427	0.0164171	0.101478	0.138696	0.36979	0	0.0448545	0.26773	0.679174	0	0.0616763	0.323671	0.491962	0	0.0716216	0	0.29769	0	0.079566	0.11231	0.391445	0.0178508	0.0113438	0.281876	0.619462	0	0	0.0241788	0.0184007	0	0	0.0641011	0.281138	0.456161	0	0.0603453	0.303557	0.369099	0.0370863	0.086954	0.252168	0.643811	0.79689
ASV73	Bacteria	Pseudomonadota	Gammaproteobacteria	0.309129	0.264802	0.129877	0	0.300981	0.264226	0.266585	0.065432	0.324588	0.210937	0.147157	0	0.424369	0.288905	0.120864	0	0.437067	0.211609	0.274474	0	0.299388	0.277275	0.192833	0	0.347403	0.301745	0.1433	0	0.393805	0.483436	0.447308	0.288662	0.463802	0.312182	0.168265	0	0.128135	0.292119	0.176566	0.139034	0.116049	0.242979	0.228979	0.100176	0	0
ASV74	Bacteria	Pseudomonadota	Gammaproteobacteria	0.20299	0.249282	0.250185	0.124974	0.205761	0.36379	0.336834	0.153666	0.171002	0.258216	0.317099	0.210131	0.267411	0.301889	0.249923	0.197663	0.277048	0.244164	0.299106	0.180995	0.137837	0.325497	0.332691	0.273306	0.151045	0.106632	0.185818	0.160017	0.113635	0.124822	0.112259	0.171357	0.205329	0.159377	0.257549	0.295935	0.128135	0.167751	0.222384	0.273433	0.182132	0.194383	0.176806	0.1589	0.0715345	0.0338074
ASV75	Bacteria	Unclassified Bacteria	Unclassified Bacteria	0.45905	0.136766	0	0	0.378688	0.0919047	0	0	0.308754	0	0	0	0.662714	0	0	0	0.527824	0.125338	0	0	0.540973	0	0.0805238	0	0.288359	0.552442	0	0	0.879694	0.81035	0.820352	0.328913	0.529024	0.496205	0.111032	0	0	0.494577	0.0681678	0	0	0.289017	0	0	0	0
ASV76	Bacteria	Pseudomonadota	Unclassified Pseudomonadota	0.39404	0.32397	0.112105	0.0286084	0.367744	0.29869	0.268386	0.0505611	0.229587	0.315194	0.108231	0	0.127892	0.314874	0.106525	0	0.286601	0.205098	0.299106	0.14051	0.238621	0.323086	0.256405	0.0793469	0.307582	0.248429	0.0866101	0	0.30564	0.350689	0.388588	0.327763	0.396164	0.312182	0.184291	0.0887804	0.0905488	0.244396	0.248086	0.173792	0.0612478	0.291575	0.217385	0.0431794	0	0
ASV77	Bacteria	Actinomycetota	Acidimicrobiia	0.177782	0.31912	0.307604	0.103894	0.0974083	0.264226	0.275591	0.118967	0.166252	0.221848	0.271528	0	0.255784	0.402519	0.227389	0.281121	0.181514	0.258814	0.355409	0.352465	0.210461	0.520796	0.436524	0.213355	0.236179	0.162216	0.278727	0	0.0352661	0	0.0535387	0.166757	0.22707	0.221813	0.431538	0.207154	0.252853	0.205351	0.330782	0.361488	0.186967	0.134278	0.260862	0.212443	0	0
ASV78	Bacteria	Verrucomicrobiota	Unclassified Verrucomicrobiota	0.310456	0.229883	0.162688	0.0782967	0.230934	0.21253	0.214349	0.116985	0.272337	0.210937	0.163296	0.0825516	0.220905	0.363566	0.153641	0	0.229281	0.278347	0.253361	0.100024	0.226764	0.250753	0.226738	0.0722938	0.271881	0.268848	0.0944837	0.0703107	0.271353	0.146616	0.262513	0.273711	0.289876	0.269462	0.219775	0.147967	0.150345	0.257411	0.182153	0.180744	0.0918718	0.295412	0.281151	0.0794501	0.046287	0.101422
ASV79	Bacteria	Bacteroidota	Flavobacteriia	0	0	0	5.34074	0	0	0	0.407463	0	0	0	0.0750469	0	0	0	0.202056	0	0.0244164	0	0.0928793	0	0	0	0	0	0	0	0	0	0.911396	0	0.437018	0	0	0	0	0	0	0	0	0	0	0.0637663	1.34029	0	0
ASV80	Bacteria	Chloroflexota	Chloroflexia	0.100832	0.127066	0.18593	0.31921	0.120392	0.0919047	0	0.385653	0.0839179	0.186692	0.234501	0.450281	0	0.178537	0.260166	0	0.105087	0.102549	0.133718	0.259586	0.194157	0.216998	0.226738	0.211592	0.111224	0.106632	0.275578	0.612188	0	0.0951022	0	0.105804	0	0.180737	0.164831	0.240447	0.261395	0.128706	0	0	0.383605	0.112538	0.0782586	0.14681	0.510209	0.311511
ASV81	Bacteria	Pseudomonadota	Gammaproteobacteria	0.151248	0.232793	0.180461	0.162616	0.16636	0.124454	0.104473	0.144744	0.126668	0.0860721	0.177537	0.221388	0	0.126599	0.202807	0.162523	0.119417	0.0992936	0.218172	0.180995	0.182301	0.207354	0.178	0.142824	0.104358	0.131588	0.111806	0.254573	0.241965	0.124822	0.0846257	0.109254	0.137691	0.144589	0.143083	0.203455	0.174264	0.118583	0.129631	0.210868	0.15312	0.158576	0.0695632	0.058724	0.211448	0.618193
ASV82	Bacteria	Chloroflexota	Chloroflexia	0.343624	0.183324	0	0	0.413712	0.214444	0.140498	0.0287504	0.315088	0.214574	0.14241	0	0.33717	0.139583	0	0	0.401242	0.304392	0.133718	0	0.432779	0.0626884	0.163167	0	0.315821	0.410645	0	0	0.437888	0.422016	0.390315	0.400216	0.234316	0.353258	0.244958	0	0	0.322487	0.241381	0	0	0.285181	0.405785	0	0	0
ASV83	Bacteria	Pseudomonadota	Gammaproteobacteria	0.484258	0.271592	0.0341782	0	0.425751	0.172321	0.23056	0	0.43859	0.113955	0.0294313	0	0.325544	0.210998	0.0327768	0	0.530213	0.180682	0.12668	0	0.296424	0.17601	0.086881	0	0.352896	0.417451	0	0	0.520175	0.354652	0.400677	0.341564	0.386501	0.346686	0.128202	0	0	0.32538	0.184388	0	0	0.257046	0.133329	0	0	0
ASV84	Bacteria	Chloroflexota	Chloroflexia	0.110119	0.178474	0.281629	0.310176	0.0656685	0.281458	0.306213	0.303367	0.0981681	0.243669	0.307605	0.320826	0	0.201259	0.303185	0	0.0812037	0.185565	0.253361	0.231007	0.108195	0.142254	0.239452	0.359706	0	0.0646596	0.330693	0.298214	0	0	0	0.0920037	0	0	0.159108	0	0.35707	0.0896602	0.184388	0.345267	0.332028	0.0754514	0.223182	0.195171	0.261943	0.132815
ASV85	Bacteria	Pseudomonadota	Gammaproteobacteria	0	0.104757	0.339048	0.367392	0.0317398	0.12254	0.133293	0.344014	0	0.0860721	0.285769	0.4803	0	0.129845	0.288846	0.285513	0	0.0520884	0.140756	0.233389	0	0.139843	0.175881	0.384392	0.0274627	0	0.231485	0.550363	0	0	0	0.0184007	0	0.0180737	0.095007	0.188658	0.310941	0	0.0871654	0.393929	0.370711	0.0242979	0	0.240077	0.427103	0.33083
ASV86	Bacteria	Chloroflexota	Chloroflexia	0.225545	0.247342	0.0683564	0	0.277997	0.216359	0.142299	0	0.316671	0.214574	0.0531662	0	0.465062	0.256444	0	0	0.391689	0.250676	0.267436	0.0928793	0.395726	0.323086	0.186476	0.0458449	0.286985	0.333507	0.0866101	0	0.313477	0.318989	0.430037	0.274861	0.352683	0.456771	0.279298	0	0	0.339841	0.200034	0.0764685	0	0.290296	0.199994	0	0	0
ASV87	Bacteria	Pseudomonadota	Deltaproteobacteria	0.212278	0.219213	0.154486	0.127985	0.110542	0.291032	0.24497	0.0693976	0.26442	0.186692	0.121523	0.0525328	0.273224	0.392781	0.204855	0.237196	0.281825	0.301136	0.387079	0.264349	0.213425	0.364075	0.29031	0.121665	0.201851	0.268848	0.206289	0.0315186	0.145963	0.190204	0.200339	0.197808	0.195666	0.274391	0.157963	0	0.162304	0.131598	0.200034	0.243309	0.15312	0.21996	0.313034	0.205534	0.00841583	0
ASV88	Bacteria	Pseudomonadota	Deltaproteobacteria	0.33301	0.32688	0.168157	0	0.214517	0.308264	0.33143	0.0535353	0.273921	0.386718	0.178487	0	0.215091	0.295397	0.143399	0.158131	0.241223	0.224631	0.249842	0.242915	0.157105	0.315853	0.264881	0.155167	0.166149	0.208726	0.199991	0	0.213556	0.132747	0.198611	0.163307	0.297123	0.169235	0.216341	0.155366	0.153762	0.187997	0.201151	0.16684	0.0838128	0.134278	0.220283	0.098449	0	0
ASV89	Bacteria	Pseudomonadota	Alphaproteobacteria	0.224218	0.162955	0.168157	0.140031	0.174022	0.160833	0.122485	0.235952	0.178919	0.244881	0.226906	0.157598	0	0.236967	0.124962	0.101028	0.188679	0.21812	0.207615	0.114313	0.283085	0.195298	0.241571	0.134008	0.168896	0.222338	0.138576	0.189112	0.173392	0.126803	0.200339	0.149506	0.166679	0.24153	0.168265	0.13687	0.0751726	0.154736	0.131866	0.118179	0.154731	0.18671	0.179705	0.0846316	0.203032	0.0821038
ASV90	Bacteria	Pseudomonadota	Unclassified Pseudomonadota	0.355565	0.193024	0.0205069	0.0376427	0.388539	0.128284	0.122485	0.0198279	0.334088	0.0957703	0.0237349	0	0.441809	0.152568	0.018437	0.0571027	0.406019	0.146499	0.133718	0.0190522	0.192675	0.147077	0.0762857	0.0123428	0.289732	0.375479	0.00787364	0.0218206	0.700424	0.58052	0.485303	0.286362	0.403411	0.349972	0.114466	0.0110975	0.0358778	0.266088	0.111751	0.0463446	0.0274004	0.283902	0.118837	0.0414522	0	0
ASV91	Archaea	Methanobacteriota	Unclassified Methanobacteriota	0	0	0.11894	0.248442	0	0	0	0.173494	0	0	0.103484	0.493433	0	0	0.0901362	0.193271	0	0	0	0	0	0	0	0.0740571	0	0	0.1433	0.538241	0	0	0	0	0	0	0	0.199756	0.136677	0	0	0	0.233709	0	0	0.124357	0.799503	1.30159
ASV92	Archaea	Methanobacteriota	Unclassified Methanobacteriota	0.0278614	0.0843874	0.102535	0.174662	0.0273619	0.042123	0	0.11401	0	0.0594019	0.0939903	0.307692	0	0	0.0880877	0	0	0.0488329	0	0.0357228	0	0.135021	0.108071	0.102269	0.0370747	0.0363001	0.108656	0.472779	0	0	0	0.0333514	0.0241563	0.0427196	0.0721137	0	0.117884	0.033261	0.0569928	0.139034	0.170849	0.0255768	0	0	0.536509	1.11323
ASV93	Bacteria	Chloroflexota	Chloroflexia	0	0.0533483	0.174992	0.257476	0	0.101478	0.111678	0.225047	0	0.105469	0.175638	0.375235	0	0.188275	0.299088	0.281121	0	0.148126	0.285031	0.195285	0	0.151899	0.165286	0.313861	0	0.154275	0.237784	0.363676	0.10188	0.172373	0	0.105804	0	0.1183	0.172844	0.266341	0.246019	0.125813	0.136336	0.310509	0.261109	0.0907975	0	0.264258	0.339789	0.39603
ASV94	Bacteria	Nitrospinota	Nitrospinia	0.175129	0.224063	0.172258	0.117445	0.155415	0.312093	0.255778	0.104096	0.134585	0.252155	0.214564	0.135084	0	0.298643	0.163884	0.289906	0.150466	0.26207	0.260398	0.176232	0.345334	0.301386	0.33481	0.163984	0.186746	0.162216	0.195266	0.0509146	0.213556	0	0	0.193208	0.125613	0.154448	0.27014	0.351422	0.105925	0.133044	0.191093	0.162206	0.172461	0.138114	0.220283	0.0708142	0.0378712	0
ASV95	Bacteria	Chloroflexota	Chloroflexia	0	0.0455886	0.200968	0.418586	0	0.0344643	0.0810563	0.591863	0	0	0.210766	0.54409	0	0	0.188467	0.351401	0	0	0	0.116694	0	0	0	0.245094	0	0	0.211014	0.818271	0	0	0	0	0	0	0.0824157	0.392113	0.353653	0	0	0.134399	0.191802	0	0	0.20208	0.738489	0.333245
ASV96	Bacteria	Verrucomicrobiota	Verrucomicrobiia	0.0636833	0.228913	0.12851	0.105399	0.0809912	0.078502	0.140498	0.0951739	0.0744177	0.0715247	0.163296	0.225141	0	0.0941375	0.0921848	0.0790653	0.0477669	0.0472051	0.0879724	0.0523934	0.0741059	0.142254	0.101714	0.0952163	0.0755225	0.113438	0.135427	0.249724	0.242944	0.053495	0.0742634	0.0460019	0.0628065	0.0722947	0.119045	0.229349	0.114467	0.0694143	0.0737554	0.0764685	0.0999307	0.0728938	0.0550709	0.0483609	0.226175	0.709956
ASV97	Bacteria	Pseudomonadota	Alphaproteobacteria	0.175129	0.177504	0.158587	0.0572169	0.171833	0.197212	0.25938	0.0644407	0.172586	0.237607	0.161398	0	0.139519	0.191521	0.176175	0.254766	0.193456	0.260442	0.218172	0.207192	0.213425	0.200121	0.258524	0.160457	0.152418	0.207591	0.215738	0	0.140085	0.186242	0.138164	0.177107	0.212576	0.208669	0.207184	0.170162	0.146928	0.169197	0.151981	0.155254	0.128943	0.205893	0.191299	0.141628	0	0
ASV98	Bacteria	Unclassified Bacteria	Unclassified Bacteria	0.116753	0.235703	0.32401	0.120457	0.100692	0.327411	0.372859	0.136812	0.0950013	0.299434	0.311402	0.0487805	0	0.321366	0.221243	0.193271	0	0.244164	0.35189	0.23577	0.0978198	0.332731	0.33481	0.236277	0.090627	0.0612564	0.256681	0.0327308	0	0	0	0.106954	0	0	0.200316	0.447601	0.184514	0.088214	0.215679	0.243309	0.167626	0.141951	0.336222	0.1589	0	0
ASV99	Archaea	Methanobacteriota	Unclassified Methanobacteriota	0.151248	0.218243	0.13808	0.0707682	0.295508	0.204871	0.264784	0.0723718	0.169419	0.156384	0.115826	0.0881801	0	0.198013	0.0614565	0.549064	0.272271	0.206726	0.309663	0.209574	0.240103	0.142254	0.129262	0	0.186746	0.33691	0.0944837	0.0266696	0.186127	0.140672	0.221063	0.24151	0.272967	0.259604	0.196882	0	0	0.303688	0.121808	0	0	0.239143	0.214487	0.0725414	0	0
ASV100	Bacteria	Chloroflexota	Chloroflexia	0.0716437	0.122216	0.236513	0.233385	0.0492514	0.107222	0.203541	0.242892	0.0649176	0.109105	0.178487	0.219512	0	0.149322	0.266312	0.180093	0.0788154	0.136732	0.151313	0.204811	0.0533563	0.118143	0.158929	0.283886	0.0851344	0.0385689	0.288175	0.334582	0	0.0297194	0	0.0644026	0.0700534	0.08051	0.170555	0.462398	0.288731	0.0795372	0.109516	0.159889	0.199861	0.0831245	0.20869	0.248713	0.211448	0.132815
ASV101	Bacteria	Planctomycetota	Unclassified Planctomycetota	0.347605	0.215333	0	0	0.294414	0.310178	0.275591	0	0.335671	0.16972	0	0	0.418556	0.25969	0	0	0.353475	0.162776	0.292068	0	0.200086	0.236287	0.125024	0	0.236179	0.233682	0	0	0.375192	0.281344	0.240061	0.227709	0.316448	0.256318	0.132781	0	0	0.221258	0.137453	0	0	0.204614	0.211588	0	0	0
ASV102	Bacteria	Chloroflexota	Chloroflexia	0.123386	0.187204	0.168157	0.0918481	0.130243	0.21253	0.262983	0.167546	0.0855012	0.183055	0.190829	0.0318949	0.255784	0.220736	0.180272	0.206448	0.148077	0.195332	0.341333	0.176232	0.167479	0.202532	0.205548	0.188669	0.115343	0.0918847	0.240933	0.0339431	0.119513	0.154541	0.0777175	0.135705	0.164263	0.16102	0.168265	0.22565	0.119593	0.10846	0.181036	0.0996408	0.127331	0.156018	0.243471	0.139901	0.0252475	0
ASV103	Bacteria	Pseudomonadota	Gammaproteobacteria	0.342298	0.182354	0.0300768	0	0.223273	0.141686	0.15851	0	0.242253	0.115167	0.0246843	0	0.505755	0.191521	0	0	0.501552	0.174171	0.211134	0	0.247514	0.183243	0.0805238	0	0.377612	0.299476	0	0	0.227271	0.283325	0.2936	0.315113	0.34302	0.253031	0.151095	0	0	0.277657	0.122926	0	0	0.285181	0.136228	0	0	0
ASV104	Bacteria	Pseudomonadota	Gammaproteobacteria	0.420575	0	0	0	0	0	0	0	1.65619	0	0	0	0	0	0	0	0	0	0.921951	0	0	0	0	0	2.47714	0.0408376	0	0	0	0	0	0	0	0	0	1.03947	0	0	0	0	0	0	0	0	0.0694306	0.1304
ASV105	Bacteria	Actinomycetota	Acidimicrobiia	0.318416	0.189144	0	0	0.186061	0.239335	0.0954663	0	0.20267	0.0848598	0	0	0.441809	0.308381	0	0	0.33198	0.27672	0	0.100024	0.360155	0.200121	0.141976	0	0.25815	0.275654	0.0535408	0	0.233148	0.182279	0.231426	0.23576	0.384086	0.354901	0.204895	0	0	0.260304	0.246969	0.106593	0	0.154739	0.1884	0	0	0
ASV106	Bacteria	Pseudomonadota	Unclassified Pseudomonadota	0.208297	0.143556	0.0806606	0.109917	0.157604	0.250823	0.192734	0.0931911	0.215336	0.152748	0.11013	0.0787992	0.38949	0.285659	0.0942333	0	0.224504	0.10906	0.260398	0.100024	0.191193	0.209765	0.173762	0.105796	0.201851	0.147469	0.0834606	0.0363676	0.144983	0.227849	0.203793	0.150656	0.207745	0.215241	0.148806	0.247845	0.126427	0.173536	0.107281	0.199282	0.137002	0.135557	0.240573	0.13472	0	0
ASV107	Bacteria	Acidobacteriota	Terriglobia	0.115426	0.193024	0.23788	0.120457	0.0744243	0.306349	0.235964	0.130864	0.134585	0.278825	0.215513	0.0694184	0.174398	0.298643	0.200758	0.237196	0.114641	0.20347	0.38356	0.231007	0.087445	0.260398	0.243691	0.201012	0.0631643	0	0.22991	0.0897068	0	0	0	0.0793532	0.157016	0.113371	0.20375	0.307032	0.143511	0.0665221	0.265966	0.224771	0.132166	0.0856821	0.211588	0.138174	0.0136757	0
ASV108	Bacteria	Pseudomonadota	Unclassified Pseudomonadota	0.070317	0.139676	0.18593	0.170145	0.138998	0.300605	0.135094	0.179442	0.196336	0.162446	0.196525	0.185741	0	0.21749	0.122913	0	0	0.317414	0.281512	0	0.155622	0.245931	0	0.156931	0.0466866	0.0669283	0.171645	0.219418	0	0	0	0.0931538	0.118366	0	0.241524	0	0.273355	0.182213	0.164273	0.291971	0.170849	0.0703361	0.365207	0.119175	0.154641	0.0917631
ASV109	Bacteria	Pseudomonadota	Alphaproteobacteria	0	0.0717778	0.199601	0.347818	0	0.101478	0.140498	0.225047	0	0.0509159	0.231653	0.363977	0	0.123353	0.272457	0.254766	0	0.0634828	0.161869	0.202429	0	0	0.171643	0.310334	0	0	0.253531	0.440048	0	0	0	0	0	0	0.101875	0.214553	0.331443	0	0.0726379	0.15062	0.261109	0	0.185502	0.195171	0.374504	0.142474
ASV110	Bacteria	Pseudomonadota	Gammaproteobacteria	0.0517427	0	0	0	0.0569127	0.111052	0	0	0	0	0	0.0337711	0	0	0	0	0.250776	0	0	0	0.0163033	0	0	0	0	0	0	0	0	0	0	0	0	0.0246459	0.0274719	0	0	0	0.00782254	0	0	0.145788	0.0347816	0	0.437623	0.0458815
ASV111	Bacteria	Pseudomonadota	Gammaproteobacteria	0.242793	0.143556	0	0	0.211234	0.155089	0.185529	0	0.23117	0.121228	0	0	0.279037	0.10063	0.0471167	0	0.222116	0.183937	0.105567	0	0.265299	0.0916215	0.0614524	0	0.248538	0.279057	0	0	0.40654	0.340783	0.44558	0.23461	0.415489	0.226742	0.122479	0	0	0.227043	0.164273	0	0	0.225075	0.165213	0	0	0
ASV112	Bacteria	Pseudomonadota	Unclassified Pseudomonadota	0.0689902	0.240552	0.228311	0.183696	0.0798967	0.254653	0.291803	0.182417	0.0617509	0.163658	0.257287	0.123827	0.145332	0.188275	0.272457	0.316261	0	0.133477	0.200577	0.211955	0.037053	0.214587	0.190714	0.289175	0.050806	0.0374345	0.20314	0.152744	0	0	0.0569928	0.0609525	0	0.0591502	0.127058	0.307032	0.181098	0.0419378	0.176566	0.278067	0.148284	0.0728938	0.197096	0.212443	0.0315593	0
ASV113	Bacteria	Pseudomonadota	Unclassified Pseudomonadota	0	0.0232793	0.0505838	0.0948595	0	0.0344643	0	0.104096	0	0	0.0351277	0.19137	0	0	0	0.0922428	0	0	0	0.130984	0	0	0	0.0564245	0	0	0.0440924	0.31761	0	0	0	0	0	0	0	0	0.0427117	0	0	0.0671996	0.0789775	0	0	0.0518153	0.383972	1.66139
ASV114	Bacteria	Acidobacteriota	Unclassified Acidobacteriota	0.090218	0.161015	0.143549	0.0782967	0.0525348	0.216359	0.165715	0.0981481	0.0554175	0.145474	0.253489	0.0356473	0	0.256444	0.215098	0.267943	0.076427	0.252303	0.28855	0.207192	0.109677	0.361664	0.220381	0.35089	0.130448	0.0850784	0.201565	0.0400044	0	0	0	0.123055	0.111119	0.141303	0.192303	0.22565	0.174264	0.088214	0.202269	0.289654	0.0934836	0.136836	0.234776	0.164082	0.0147277	0
ASV115	Bacteria	Chloroflexota	Chloroflexia	0.163188	0	0.195499	0.176168	0.215612	0	0	0.176468	0.155169	0.072737	0.139561	0.0637899	0.418556	0.210998	0.188467	0.298691	0.298543	0	0	0.200048	0.214907	0.17601	0	0.199249	0.146926	0.213263	0.166921	0.071523	0.247842	0.200111	0.195157	0.180557	0.258473	0.177451	0	0.373617	0.0905488	0.185105	0	0.159889	0.195026	0	0	0.264258	0.0620667	0
ASV116	Bacteria	Chloroflexota	Dehalococcoidia	0.124713	0.106697	0.170891	0.140031	0.119298	0.199127	0.21615	0.165563	0.118752	0.192753	0.168993	0.15197	0.203465	0.120106	0.186418	0.158131	0.119417	0.159521	0.172426	0.226244	0.142283	0.204943	0.173762	0.208065	0.108478	0.0669283	0.174795	0.0884945	0.0411438	0.0376446	0.0397223	0.133405	0.101457	0.124873	0.144227	0.288536	0.201599	0.0954447	0.116221	0.206233	0.138614	0.130441	0.147822	0.177899	0.0431311	0
ASV117	Bacteria	Pseudomonadota	Alphaproteobacteria	0.0689902	0.106697	0.168157	0.135514	0.0470624	0.0823313	0.117081	0.179442	0.0918346	0.0969826	0.0987373	0.202627	0.0639461	0.0973836	0.180272	0.175701	0.0835921	0.100921	0.151313	0.114313	0.0844807	0.118143	0.152571	0.257437	0.101612	0.111169	0.223611	0.244875	0.0754303	0.0752893	0.10535	0.0931538	0.0869628	0.116657	0.151095	0.247845	0.198182	0.0939986	0.092753	0.157572	0.185355	0.108701	0.115939	0.103631	0.132549	0.166622
ASV118	Archaea	Methanobacteriota	Unclassified Methanobacteriota	0	0.140646	0.287097	0.320716	0.0536293	0.14743	0.093665	0.251814	0.0459173	0.212149	0.257287	0.208255	0	0.110368	0.221243	0.307476	0	0.148126	0.119642	0.192903	0	0.207354	0.182238	0.199249	0	0	0.277152	0.253361	0	0	0	0.0471519	0	0.0476488	0.139649	0	0.268229	0	0.0894005	0.190013	0.282062	0.0716149	0.211588	0.298801	0.127289	0
ASV119	Bacteria	Pseudomonadota	Alphaproteobacteria	0.201664	0.123186	0.125776	0.0752853	0.259391	0.141686	0.0594413	0.0356902	0.152002	0.105469	0.0769012	0.0412758	0	0.0876453	0.0696507	0	0.191068	0.200215	0	0	0.197122	0.139843	0.0974762	0.141061	0.271881	0.30061	0.0992079	0.0412166	0.315436	0.194167	0.170979	0.226559	0.234316	0.190595	0.12019	0	0.0444201	0.201012	0.111751	0.0973236	0.0467418	0.158576	0.086954	0	0.0326113	0
ASV120	Bacteria	Pseudomonadota	Alphaproteobacteria	0.201664	0.120276	0.0915976	0	0.141187	0.135942	0	0.0495697	0.194753	0.105469	0.0901927	0.0262664	0.249971	0.181783	0	0.0571027	0.257941	0.148126	0.19002	0.116694	0.232693	0.180832	0.161048	0.0634775	0.181254	0.322163	0.0992079	0	0.297803	0.263512	0.271148	0.225409	0.268135	0.251388	0.0858497	0	0.051254	0.154736	0.111751	0.0787858	0.0515771	0.196941	0.142025	0.0898131	0	0
ASV121	Bacteria	Pseudomonadota	Gammaproteobacteria	0	0.30845	0.165423	0	0.265957	0.0919047	0.036025	0	0.153586	0	0.178487	0	0.244158	0	0.0245826	0	0	0	0	0	0	0	0	0.116375	0.446269	0	0.119679	0.11274	0	0	0.00863528	0	0	0	0	0	0.172555	0.0607375	0.134101	0	0	0	0	0	0.701669	0.284948
ASV122	Archaea	Thermoproteota	Unclassified Thermoproteota	0.201664	0.142586	0.112105	0.0542054	0.280186	0.132113	0.0774538	0.0228021	0.242253	0.170932	0.0835469	0	0.238344	0.149322	0.0737478	0	0.265106	0.151382	0.105567	0	0.318655	0.202532	0.135619	0.0405551	0.173015	0.232548	0.0771617	0	0.261557	0.332858	0.259058	0.156406	0.142522	0.248102	0.122479	0	0.0341693	0.254519	0.092753	0.050979	0.0386828	0.117653	0	0.0466337	0	0
ASV123	Bacteria	Chloroflexota	Chloroflexia	0.269327	0.183324	0	0	0.232029	0.130198	0.160311	0	0.296088	0.105469	0	0	0.529008	0.175291	0	0	0.26033	0.265325	0	0	0.271228	0.166365	0.105952	0	0.259523	0.259773	0	0	0.194943	0.265494	0.295327	0.24611	0.28746	0.239887	0.109888	0	0	0.26175	0.107281	0	0	0.242979	0.124634	0	0	0
ASV124	Bacteria	Verrucomicrobiota	Unclassified Verrucomicrobiota	0	0.0698378	0.214639	0.185202	0	0.114881	0.10087	0.191339	0	0.0872844	0.185132	0.212008	0	0	0.227389	0.311869	0	0	0.168907	0.200048	0	0	0.146214	0.141061	0	0	0.207864	0.316398	0	0	0	0	0	0	0.0698244	0.255244	0.261395	0	0.0737554	0.196964	0.174073	0	0	0.100176	0.204084	0.509526
ASV125	Bacteria	Unclassified Bacteria	Unclassified Bacteria	0.242793	0.122216	0	0	0.177305	0.12254	0.10087	0	0.174169	0.0424299	0.0531662	0	0.575514	0	0	0	0.28899	0.115571	0	0	0.179336	0.149488	0.089	0	0.149672	0.311954	0	0	0.794467	0.36654	0.316051	0.192058	0.190835	0.205383	0.0721137	0	0	0.201012	0.0860479	0	0	0.127884	0	0	0	0
ASV126	Bacteria	Pseudomonadota	Unclassified Pseudomonadota	0	0.0290991	0.155853	0.239407	0	0.0727579	0.111678	0.192331	0	0.0436422	0.135764	0.245779	0	0.0681685	0.165933	0.0922428	0	0	0	0.150036	0	0.0650995	0.105952	0.222171	0	0	0.107082	0.276394	0	0	0	0	0	0	0.0583778	0.288536	0.160596	0	0.0268201	0.157572	0.178908	0	0	0.115721	0.219863	0.695467
ASV127	Bacteria	Planctomycetota	Planctomycetia	0.0809308	0.111547	0.214639	0.130996	0.0612906	0.135942	0.118883	0.202245	0.0617509	0.120016	0.211716	0.105066	0	0.0973836	0.180272	0.0922428	0	0.113943	0.175945	0.192903	0.0355708	0.209765	0.137738	0.123428	0.0755225	0.065794	0.207864	0.103042	0.108737	0.0970835	0.0777175	0.0540522	0.045897	0	0.140793	0.107276	0.235768	0	0.115103	0.278067	0.148284	0.0703361	0.26376	0.0967218	0.132549	0.0965927
ASV128	Bacteria	Bacteroidota	Unclassified Bacteroidota	0.222891	0.213393	0.105269	0.0707682	0.154321	0.164663	0.190933	0.0852599	0.205836	0.152748	0.114877	0.0450281	0.249971	0	0.0532623	0	0.203009	0.102549	0.207615	0	0.124498	0.135021	0.0656905	0.0546612	0.196358	0.139529	0.108656	0.0521269	0.207678	0.134728	0.174433	0.180557	0.214991	0.128159	0.0892837	0.0480894	0.0871318	0.195228	0.101693	0.0764685	0.0741421	0.136836	0.118837	0.0673598	0	0
ASV129	Bacteria	Pseudomonadota	Alphaproteobacteria	0	0	0	0.987744	0	0	0	1.02808	0	0	0	0.712946	0	0	0	1.54617	0	0.288114	0	0.354846	0	0.127788	0	0	0	0	0	0	0	0.116896	0	0.362265	0.106288	0	0	0	0	0	0	0	0.130555	0	0.318831	0	0	0
ASV130	Bacteria	Pseudomonadota	Alphaproteobacteria	0	0.124156	0.0765592	0	0	0	0.0252175	0	0.161502	0	0	0	0	0	0	0	0	0	0.0738968	0	0	0	0.042381	0	0	0	0	0	0	0	0	0	0	0	0	0.0850812	0	0	0	0	0	0.0652207	0.159416	0.701233	1.94195	1.55031
ASV131	Bacteria	Bacteroidota	Unclassified Bacteroidota	0.108792	0.0892372	0.124409	0.0948595	0.0591017	0.0880754	0.162113	0.0545267	0.0475007	0.11153	0.119624	0.178236	0	0	0.116767	0	0.0931455	0.0651105	0	0.0785901	0.0696596	0.11091	0.086881	0.0811102	0.050806	0.0896159	0.0677133	0.128499	0.0666138	0.0812332	0.0431764	0.0529021	0.101457	0.0394335	0.0766924	0.0961787	0.160596	0.104121	0.115103	0.134399	0.0934836	0.047317	0.0724617	0.039725	0.104146	0.557823
ASV132	Bacteria	Pseudomonadota	Alphaproteobacteria	0.257387	0.161985	0	0	0.233123	0.233591	0	0	0.145669	0.100619	0	0	0.244158	0	0	0	0.257941	0.102549	0.292068	0	0.401654	0.156721	0.197071	0	0.119463	0.279057	0.0425177	0	0.205719	0.233793	0.131256	0.204708	0.152185	0.26289	0.129347	0	0	0.264642	0.109516	0	0	0.207172	0	0.098449	0	0
ASV133	Bacteria	Unclassified Bacteria	Unclassified Bacteria	0	0.0902072	0.250185	0.249947	0	0.124454	0.183728	0.277591	0	0.0969826	0.200323	0.21576	0	0	0.319574	0.364579	0	0	0	0.316742	0	0	0.271238	0.412604	0	0	0.26298	0.221842	0	0	0	0	0	0	0.0858497	0.325528	0.358778	0	0.0849304	0.312826	0.259497	0	0	0.212443	0.094678	0
ASV134	Bacteria	Chloroflexota	Chloroflexia	0.025208	0.0514084	0.150384	0.254464	0.0186061	0.0938194	0.0738513	0.247849	0.0253337	0.100619	0.121523	0.373358	0	0.133091	0.151593	0.232803	0.0262718	0.0716216	0.109086	0.116694	0.0296424	0.0988547	0.105952	0.195722	0.0178508	0.0124782	0.137001	0.266696	0	0	0	0.025301	0.0338189	0.027932	0.0652458	0	0.227226	0.0202458	0.0514053	0.12513	0.177296	0.0294133	0.0463755	0.120902	0.273514	0.173867
ASV135	Bacteria	Pseudomonadota	Alphaproteobacteria	0	0.0426787	0.12851	0.233385	0	0.0593551	0.0522363	0.247849	0	0	0.0844963	0.347092	0	0	0.108573	0.245981	0	0	0	0.107168	0	0	0.0529762	0.16222	0	0	0.144875	0.402468	0	0	0	0	0	0	0	0.173862	0.222101	0	0.0368777	0.0787858	0.177296	0	0	0.0898131	0.357673	0.511941
ASV136	Bacteria	Pseudomonadota	Alphaproteobacteria	0.244119	0.130946	0.103902	0	0.108353	0	0	0	0.172586	0.152748	0	0	0	0	0	0	0.296155	0.196959	0.274474	0	0.208979	0.270042	0.144095	0	0.192239	0.132722	0	0	0.124411	0.241718	0.397223	0.132255	0.461386	0.280963	0.115611	0	0	0.240058	0.121808	0	0	0.3082	0	0	0	0
ASV137	Bacteria	Pseudomonadota	Gammaproteobacteria	0.232179	0.0717778	0	0	0.241879	0.0229762	0	0	0.204253	0	0	0	0.348797	0	0	0	0.329592	0.0732493	0	0	0.188229	0.0409885	0	0	0.159284	0.241623	0	0	0.613239	0.414091	0.402404	0.204708	0.260888	0.18238	0.0274719	0	0	0.284888	0.0245851	0	0	0.150903	0	0	0	0
ASV138	Bacteria	Planctomycetota	Unclassified Planctomycetota	0	0.0940871	0.0984333	0.153582	0.0656685	0.0995635	0	0.0862513	0.0665009	0.116379	0.103484	0	0	0.0746608	0.178224	0	0.0597086	0.0472051	0.154831	0	0.062249	0.202532	0.116548	0.105796	0.0494329	0.0465095	0	0.110315	0	0.0673641	0.0397223	0.0644026	0	0	0.0789817	0	0.153762	0.0665221	0.090518	0.155254	0.119272	0.0447593	0	0.105358	0.224071	0.59646
ASV139	Bacteria	Gemmatimonadota	Gemmatimonadia	0.0796041	0.119306	0.174992	0.123468	0.045968	0.157004	0.17292	0.138795	0	0.162446	0.168993	0.101313	0	0.210998	0.196661	0.171308	0.0477669	0.117199	0.197058	0.252441	0	0	0.239452	0.234514	0.0466866	0.0181501	0.163772	0.147895	0	0	0	0.0471519	0	0.0443627	0.145372	0	0.242602	0	0.147511	0.271116	0.204697	0.0255768	0.15072	0.176172	0.049443	0
ASV140	Bacteria	Pseudomonadota	Gammaproteobacteria	2.82727	0	0	0.152076	0	0	0	0	0	0	0.00474699	0	0	0	0	0	0	0.027672	0	0	0	0.0120555	0	0	0	0	0	0.0206083	0	1.03424	0	0.00920037	0	0	0	0	0	0	0	0	0	0	0	0.222806	0.0452351	0.0193185
ASV141	Bacteria	Pseudomonadota	Alphaproteobacteria	0.168495	0.106697	0.0451152	0	0.144471	0.0976488	0.0954663	0	0.196336	0.117591	0	0	0.249971	0.081153	0	0	0.162407	0.144871	0.12668	0.0309598	0.2238	0.0988547	0.11231	0.0246857	0.178508	0.245026	0.0377935	0	0.215515	0.208036	0.300508	0.182857	0.198082	0.19881	0.084705	0	0	0.225597	0.0782254	0	0	0.194383	0.127533	0	0	0
ASV142	Bacteria	Acidobacteriota	Vicinamibacteria	0.289228	0.0417087	0	0	0.189344	0.0210615	0	0	0.209003	0.0157597	0	0	0.273224	0	0	0	0.296155	0.0390663	0	0	0.192675	0	0	0	0.194985	0.34712	0	0	0.462378	0.299176	0.461124	0.175957	0.21016	0.208669	0.0228932	0	0	0.205351	0.0234676	0	0	0.200778	0	0	0	0
ASV143	Bacteria	Acidobacteriota	Unclassified Acidobacteriota	0.144614	0.0892372	0	0	0.175116	0.101478	0.133293	0	0.147252	0.0872844	0	0	0.360423	0.152568	0	0	0.193456	0.159521	0.133718	0	0.254924	0	0.101714	0	0.163403	0.273385	0	0	0.235107	0.241718	0.269421	0.184007	0.205329	0.238244	0.156819	0	0	0.138829	0.120691	0	0	0.172643	0	0	0	0
ASV144	Bacteria	Pseudomonadota	Alphaproteobacteria	0	0	0	0.426115	0	0	0	0.736606	0	0	0	0.741088	0	0.0324612	0	0.860933	0	0.270209	0	0.573946	0	0.0819771	0	0	0	0	0	0	0	0.241718	0	0.545122	0.0917941	0	0	0	0	0	0	0	0.101542	0	0.107243	0.207261	0	0
ASV145	Bacteria	Chloroflexota	Chloroflexia	0.19105	0.126096	0	0	0.212328	0.107222	0.108075	0	0.223253	0.0836475	0	0	0.279037	0.0584302	0	0	0.238834	0.113943	0	0	0.2238	0.0675105	0.0487381	0	0.166149	0.221204	0	0	0.232169	0.233793	0.248696	0.171357	0.173926	0.187309	0.0755477	0	0	0.212581	0.094988	0	0	0.244258	0.0666647	0	0	0
ASV146	Bacteria	Pseudomonadota	Alphaproteobacteria	0.0570496	0.0989369	0.125776	0.20327	0.0404956	0.124454	0.07205	0.171511	0	0.103044	0.0797494	0.129456	0	0.103876	0.182321	0.153738	0	0.115571	0.137237	0.171469	0.0741059	0.108499	0.158929	0.155167	0.0494329	0.0453751	0.17637	0.100617	0	0	0	0.0437018	0.0603908	0.0476488	0.119045	0.125772	0.216975	0.0592914	0.119573	0.139034	0.16279	0.0639419	0.124634	0.138174	0.133601	0.0386371
ASV147	Bacteria	Planctomycetota	Unclassified Planctomycetota	0.0504159	0.0708078	0.113472	0.106905	0.0306453	0.112966	0.111678	0.148709	0.0522507	0.0448545	0.140511	0.118199	0	0.0876453	0.110622	0.127383	0	0	0.161869	0.14051	0	0.0892104	0.125024	0	0.0425672	0	0.108656	0.215781	0	0	0	0	0	0	0.077837	0.162764	0.14522	0.0694143	0.0692854	0.180744	0.170849	0.0422016	0.15072	0.1589	0.163057	0.292193
ASV148	Bacteria	Pseudomonadota	Gammaproteobacteria	0.102159	0.0746877	0.11894	0.076791	0.0634796	0.0976488	0.0918638	0.0931911	0.121918	0.0824352	0.0939903	0.0469043	0	0	0.14135	0.184486	0.0859804	0.118827	0.242804	0.128602	0.0681774	0.0843882	0.139857	0.0969795	0.0823882	0.0896159	0.144875	0.116376	0.123431	0.0693454	0.100169	0.0563523	0	0.103513	0.0515098	0.110975	0.146928	0.0694143	0.103928	0.19233	0.109601	0.0882398	0.159416	0.143356	0.0894182	0
ASV149	Bacteria	Pseudomonadota	Alphaproteobacteria	0.0875645	0.114456	0.0505838	0.0466769	0.0777077	0.141686	0.122485	0.032716	0.169419	0.101832	0.0531662	0.0487805	0.273224	0.194767	0.0389225	0	0.200621	0.125338	0.133718	0.133365	0.142283	0.15431	0.165286	0.0511347	0.111224	0.113438	0.034644	0.0400044	0.0862061	0.146616	0.145073	0.109254	0.195666	0.147876	0.077837	0.144268	0.0307524	0.104121	0.094988	0.050979	0.0612478	0.0959128	0.202893	0.069087	0.0420791	0.00965927
ASV150	Bacteria	Chloroflexota	Chloroflexia	0	0.0805075	0.0628879	0.150571	0.0317398	0.126369	0.0756525	0.19927	0	0.103044	0.200323	0.135084	0	0.11686	0.192564	0.250373	0	0.0927825	0.182983	0.126221	0.0311245	0.0819771	0.171643	0.105796	0.0357015	0	0.207864	0.143046	0	0	0	0.050602	0	0.0476488	0.153385	0.166463	0.222101	0.0303688	0.094988	0.152937	0.146672	0.0409228	0.0927509	0.326436	0.130445	0
ASV151	Bacteria	Acidobacteriota	Terriglobia	0.173802	0.0843874	0	0	0.164171	0.157004	0.118883	0	0.21692	0.0909212	0.0104434	0	0.0930124	0.185029	0	0	0.171961	0.112316	0.144275	0	0.109677	0.156721	0.0572143	0	0.145552	0.115707	0	0	0.27821	0.174354	0.170979	0.149506	0.241563	0.179094	0.1179	0	0	0.130152	0.166508	0	0	0.211008	0.179705	0	0	0
ASV152	Bacteria	Chloroflexota	Chloroflexia	0	0.0785675	0.101168	0.143042	0.106164	0.120625	0.156709	0.158623	0.0791678	0.072737	0.152853	0.11257	0	0	0.0696507	0	0	0.131849	0.154831	0	0.075588	0	0.0762857	0.179853	0.0782688	0.0453751	0.222037	0.132136	0	0.10699	0	0.0540522	0.164263	0.0739378	0.10073	0.133171	0.0905488	0.076645	0.138571	0.134399	0.0967071	0.0844033	0.110142	0.0829044	0.19146	0
ASV153	Bacteria	Pseudomonadota	Gammaproteobacteria	0	0	0	0	0	0	0	0	0.0253337	0	0	0	0	0	0	0	0	0	0	0	0	0	0	0	3.70197	0	0	0	0	0	0	0	0	0.0115014	0	0	0	0	0	0	0	0	0	0	0	0
ASV154	Bacteria	Nitrospinota	Unclassified Nitrospinota	0.06501	0.0591682	0.154486	0.106905	0.0525348	0.103393	0.108075	0.108062	0.0585842	0.0715247	0.0806988	0.148218	0	0.10063	0.137253	0.131775	0.069262	0.0585995	0.109086	0.107168	0.037053	0.0892104	0.108071	0.119902	0.0631643	0.0397032	0.137001	0.227904	0.0235107	0	0.0345411	0.0322013	0.0555596	0.026289	0.0652458	0.196057	0.14522	0.0375994	0.0681678	0.185378	0.120884	0.0498747	0.0637663	0.120902	0.143069	0.115911
ASV155	Bacteria	Pseudomonadota	Unclassified Pseudomonadota	0.200337	0.0872973	0	0	0.238596	0.0593551	0.0954663	0	0.186836	0.0981949	0	0	0.186025	0.0779069	0	0	0.241223	0.0911547	0.0738968	0	0.108195	0.106088	0.0381429	0	0.159284	0.181501	0	0	0.283109	0.227849	0.26424	0.170207	0.188419	0.184023	0.0675351	0	0	0.141721	0.0737554	0	0	0.189268	0.104345	0	0	0
ASV156	Bacteria	Chloroflexota	Dehalococcoidia	0	0	0.106636	0.191225	0	0	0	0.235952	0	0	0.131017	0.262664	0	0	0.15569	0.250373	0	0	0	0.0738271	0	0	0	0.232751	0	0	0.171645	0.367313	0.0509399	0	0	0	0	0	0.0331952	0.214553	0.259687	0	0	0.194647	0.233709	0	0	0.193444	0.280878	0.173867
ASV157	Bacteria	Actinomycetota	Unclassified Actinomycetota	0.104812	0.0931171	0	0	0.118203	0.187639	0.120684	0	0.112418	0.0872844	0	0	0.31973	0.220736	0	0	0.171961	0.148126	0.151313	0.114313	0.15414	0.209765	0.175881	0	0.156538	0.132722	0.0535408	0	0.0597565	0.0772706	0.110532	0.188608	0.159432	0.193881	0.178567	0	0	0.169197	0.151981	0.050979	0	0.167528	0.165213	0	0	0
ASV158	Bacteria	Pseudomonadota	Unclassified Pseudomonadota	0.140634	0.109607	0.0710907	0	0.12477	0.176151	0.108075	0	0.166252	0.0981949	0.0370265	0	0.168585	0.15906	0	0	0.203009	0.149754	0.147794	0	0.111159	0.130199	0.0995953	0	0.157911	0.161082	0.034644	0	0.157718	0.114915	0.217609	0.150656	0.219823	0.129802	0.111032	0	0	0.133044	0.112868	0	0	0.173922	0.136228	0	0	0
ASV159	Archaea	Thermoproteota	Unclassified Thermoproteota	0.0822576	0.0940871	0.172258	0.170145	0.125865	0.164663	0	0.101122	0.115585	0.162446	0.200323	0.187617	0	0	0.143399	0	0	0.117199	0	0.0476304	0	0	0.105952	0.0740571	0	0.093019	0.114955	0.0981925	0.0695526	0	0	0.0552022	0	0	0.0961516	0	0.0632133	0.0824295	0.0681678	0.106593	0.0918718	0	0	0.119175	0.137809	0.0700297
ASV160	Bacteria	Acidobacteriota	Unclassified Acidobacteriota	0.0437823	0.100877	0.161321	0.149065	0.0218895	0.178065	0.198138	0.0793116	0.0332505	0.11153	0.164246	0.0337711	0	0.198013	0.178224	0.184486	0.0358252	0.0944103	0.179464	0.15718	0.0326066	0.192887	0.205548	0.225698	0.0343284	0.0215532	0.151174	0.0242451	0	0	0	0.0460019	0.026572	0.027932	0.132781	0.247845	0.129844	0.0202458	0.127396	0.231723	0.114437	0.0485958	0.133329	0.13472	0	0
ASV161	Bacteria	Pseudomonadota	Alphaproteobacteria	0.128693	0.109607	0.0355453	0	0.100692	0.153175	0.0738513	0	0.128252	0.123653	0	0	0.197651	0.207752	0.0573594	0	0.128971	0.144871	0.165388	0	0.177854	0.171187	0.114429	0.0564245	0.0768956	0.214398	0.075587	0	0.145963	0.0951022	0.174433	0.150656	0.207745	0.138017	0.109888	0	0	0.138829	0.105046	0	0	0.158576	0.136228	0.069087	0	0
ASV162	Bacteria	Pseudomonadota	Gammaproteobacteria	0	0.0213393	1.20991	0	0	0	1.2969	0	0.0475007	0	0	0	0	0	0	0	0	0	0	0	0	0	0.343286	0	0	0	0	0	0	0	0.0949881	0	0	0.0558641	0.0492205	0	0	0	0	0	0	0.0805668	0	0.0708142	0.284034	0.0917631
ASV163	Bacteria	Pseudomonadota	Deltaproteobacteria	0.143287	0.0989369	0.0505838	0	0.106164	0.109137	0.208945	0	0.104501	0.115167	0.0579132	0	0.0871992	0.146075	0.0676022	0.0966353	0.133747	0.193704	0.109086	0.130984	0.136355	0.118143	0.0911191	0.0299755	0.0686568	0.189441	0.058265	0	0.0773895	0.0792519	0.28151	0.102354	0.0869628	0.170878	0.140793	0.144268	0.0375863	0.0723066	0.0871654	0.0996408	0	0.13172	0	0.0725414	0	0
ASV164	Bacteria	Pseudomonadota	Gammaproteobacteria	0	0.0135796	0.0287097	0.0933538	0	0.0172321	0	0.0515525	0	0	0.0313301	0.125704	0	0	0.0389225	0	0	0	0	0.0285782	0	0	0	0.0282122	0	0	0.0267704	0.243663	0	0	0	0	0	0	0.010302	0.0591869	0.0615048	0	0	0.050979	0.0548007	0	0	0.0310892	0.236695	0.717201
ASV165	Bacteria	Unclassified Bacteria	Unclassified Bacteria	0.144614	0.095057	0	0	0.116014	0.12254	0.163914	0.0317246	0.159919	0.107893	0	0	0.162772	0.279166	0	0	0.160019	0.20347	0.28855	0	0.182301	0.207354	0	0	0.11809	0.158813	0	0	0.107758	0.101046	0.115713	0.117305	0.166679	0.164306	0.0904283	0	0	0.167751	0.103928	0	0	0.221239	0.176806	0	0	0
ASV166	Bacteria	Chloroflexota	Chloroflexia	0.0517427	0.0843874	0.0902305	0.108411	0.0744243	0.120625	0.106274	0.0525439	0.093418	0.112742	0.0797494	0.054409	0.0406929	0.11686	0.118816	0.114205	0.069262	0.169287	0.0844535	0	0.111159	0.147077	0.161048	0.126955	0.0686568	0.0374345	0.122829	0.0884945	0	0.0792519	0.0552658	0.0724529	0.0797159	0.0903684	0.105309	0.118374	0.0905488	0.0607375	0.0894005	0.118179	0.0725303	0.10998	0.107243	0.119175	0.0589108	0.0362223
ASV167	Bacteria	Chloroflexota	Chloroflexia	0.0398021	0.0446186	0.149017	0.162616	0.0317398	0.0938194	0	0.196296	0.0300838	0.0739493	0.150005	0.189493	0	0	0	0	0.0501552	0.0699938	0	0.130984	0.0340887	0	0.0911191	0.132245	0.030209	0	0.17637	0.223055	0	0	0	0.0460019	0	0.0377904	0.0595224	0.151666	0.182806	0.0231381	0.0726379	0.10891	0.172461	0.0524323	0	0.0932675	0.197772	0.161793
ASV168	Bacteria	Planctomycetota	Unclassified Planctomycetota	0.0504159	0.0678979	0.0601537	0.114434	0	0.0555258	0.093665	0.118967	0	0.0945581	0.12627	0.155722	0	0.0941375	0.122913	0.10542	0	0.0585995	0	0.0928793	0	0.118143	0.086881	0	0	0	0.100783	0.167291	0	0	0	0.0414017	0	0	0.0583778	0	0.146928	0.0535069	0.0413477	0.0718341	0.166014	0	0.0637663	0	0.190408	0.292193
ASV169	Bacteria	Planctomycetota	Unclassified Planctomycetota	0	0	0.0615208	0.168639	0	0	0	0.102114	0	0	0.0588626	0.227017	0	0	0.0716993	0.219626	0	0	0	0.102405	0	0.0578662	0.0995953	0.0987428	0	0	0.0944837	0.196385	0	0	0	0	0	0	0	0.125772	0.170847	0	0	0.129765	0.0934836	0	0	0.0656327	0.331373	0.514356
ASV170	Bacteria	Pseudomonadota	Alphaproteobacteria	0.155228	0.0717778	0	0	0.120392	0.0765873	0.0702488	0	0.156752	0.0678878	0	0	0.261597	0.0876453	0	0	0.205398	0.104177	0.0844535	0	0.189711	0.0988547	0.0572143	0	0.131821	0.214398	0	0	0.235107	0.202092	0.245242	0.164457	0.17151	0.164306	0.095007	0	0	0.159074	0.0737554	0	0	0.171364	0.0695632	0	0	0
ASV171	Bacteria	Bacillota	Clostridia	0.019901	0.0358889	0.106636	0.129491	0.0339287	0.15126	0.133293	0.124916	0.0205836	0.118804	0.129118	0.12758	0	0.129845	0.217146	0.193271	0	0.0488329	0.15835	0.216718	0.0192675	0.0843882	0.114429	0.204539	0.0219702	0.00340314	0.182669	0.109103	0	0	0	0	0.0120782	0.0147876	0.091573	0.351422	0.172555	0.0130152	0.0558753	0.155254	0.20792	0.0179037	0.0898525	0.227987	0.0715345	0.0169037
ASV172	Bacteria	Pseudomonadota	Unclassified Pseudomonadota	0	0	0	0.0707682	0	0	0	0.0337074	0	0	0.0275325	0.157598	0	0	0	0	0	0	0	0	0	0	0	0.0758204	0	0	0	0.237602	0	0	0	0	0	0	0	0	0.0358778	0	0	0	0.0499653	0	0	0	0.254579	1.70728
ASV173	Bacteria	Pseudomonadota	Gammaproteobacteria	0.0424555	0.0940871	0.120307	0.115939	0.0306453	0.0804166	0.147703	0.0852599	0.0300838	0.0739493	0.180385	0.0637899	0	0.175291	0.0983304	0.171308	0	0.0846437	0.140756	0.154799	0.025196	0.180832	0.182238	0.156931	0.0466866	0.0249563	0.119679	0.109103	0	0	0.0155435	0.0379515	0	0.0460057	0.143083	0.292235	0.1008	0.0260304	0.0536403	0.183061	0.04513	0.0460382	0.0376801	0.0639055	0.0368192	0.0313926
ASV174	Bacteria	Pseudomonadota	Unclassified Pseudomonadota	0	0.032009	0.0874962	0.114434	0	0	0.0396275	0.129873	0	0.0181842	0.0806988	0.129456	0	0	0.081942	0.0790653	0	0	0	0.0738271	0	0.0626884	0.0445	0.102269	0	0	0.0614144	0.213357	0	0	0	0	0	0	0.0434972	0.133171	0.0734641	0	0.0346427	0.0996408	0.125719	0	0	0.0742685	0.131497	0.594045
ASV175	Bacteria	Pseudomonadota	Unclassified Pseudomonadota	0.0729704	0.0999069	0.129877	0.0843196	0.0755188	0.145516	0.113479	0.0604751	0.0522507	0.129714	0.122472	0.0393996	0	0.207752	0.104476	0	0.10031	0.105805	0.147794	0.114313	0	0.142254	0.169524	0.148114	0.0617911	0.0952878	0.107082	0	0.0862061	0.0772706	0	0.0402516	0.157016	0	0.107598	0	0.076881	0.0375994	0.116221	0.104275	0.0822011	0.0703361	0.107243	0.112266	0	0
ASV176	Bacteria	Chloroflexota	Chloroflexia	0	0.0611081	0.168157	0.170145	0	0.0976488	0.0810563	0.169528	0	0.0933458	0.166144	0.0956848	0	0.10063	0.157738	0.263551	0	0	0.147794	0.178614	0	0.142254	0.120786	0.204539	0	0	0.222037	0.122438	0	0	0	0	0	0	0.0686797	0.199756	0.140094	0	0.0368777	0.183061	0.224038	0	0.0811571	0.229714	0.10625	0
ASV177	Bacteria	Bacillota	Bacilli	0.143287	1.63246	0.199601	0	0	0	0	0	0	0	0	0	0	0	0	0	0.0979221	0	0	0	0.0133391	0	0	0	0	0.240488	0	0	0.129309	0	0	0	0	0	0	0	0	0	0	0	0	0	0	0	0	0
ASV178	Bacteria	Pseudomonadota	Alphaproteobacteria	0.0729704	0.096997	0.0915976	0.0918481	0.0361177	0.114881	0	0.110045	0	0.106681	0.116776	0.131332	0.133705	0.165552	0.131107	0.241588	0.105087	0	0.144275	0.133365	0.0548384	0	0.127143	0.163984	0.0920001	0.0340314	0.0850354	0.122438	0.0783691	0	0.0569928	0.0287512	0	0.0640794	0.0549438	0.184959	0	0	0.0357602	0.15062	0.116049	0.0741726	0	0.117448	0.123081	0
ASV179	Bacteria	Gemmatimonadota	Gemmatimonadia	0	0.0358889	0.095699	0.134008	0	0.0516964	0.0522363	0.0684062	0	0.0666756	0.0626602	0.110694	0	0.0908914	0.0737478	0	0	0.0390663	0	0.104787	0	0.0433996	0.0784048	0.123428	0.0370747	0	0.0834606	0.232753	0	0	0	0	0	0	0.0389185	0.177561	0.131552	0	0.0581103	0.129765	0.11766	0	0.0840555	0.0759957	0.210396	0.379126
ASV180	Bacteria	Acidobacteriota	Unclassified Acidobacteriota	0.0968517	0.0999069	0.0970661	0.0346313	0.0733298	0.0650992	0.0918638	0.032716	0.0633342	0.0860721	0.0493687	0.00750469	0.162772	0.133091	0.0962819	0.0746728	0.117029	0.118827	0.102048	0.0976423	0.118569	0.103677	0.118667	0.0811102	0.0865076	0.105497	0.121254	0.00606127	0.0871857	0.0693454	0.113986	0.0954539	0.0748847	0.0788669	0.133926	0.0961787	0.0683387	0.0780911	0.099458	0.0347584	0.0515771	0.0997493	0.104345	0.0414522	0	0
ASV181	Bacteria	Pseudomonadota	Deltaproteobacteria	0.140634	0.124156	0.0628879	0.0240913	0.087558	0.08999	0.0540375	0.0218107	0.101335	0.0921335	0.0455711	0	0.145332	0.155814	0.0532623	0.0527102	0.186291	0.0781326	0.123161	0.0571565	0.124498	0.142254	0.0635714	0.0317388	0.111224	0.15541	0.0409429	0	0.0960022	0.112934	0.110532	0.120755	0.0942097	0.124873	0.098441	0	0.0358778	0.114244	0.0815779	0.0532963	0.0193414	0.104865	0.101446	0.0345435	0	0
ASV182	Bacteria	Chloroflexota	Chloroflexia	0.0530694	0.0892372	0.144916	0.0587226	0.0415901	0.139772	0.1441	0.0991395	0	0.121228	0.169942	0	0	0.107122	0.131107	0.149346	0.076427	0.0927825	0.172426	0.123839	0.037053	0.142254	0.165286	0.163984	0.0782688	0	0.170071	0.0351554	0	0	0	0.0471519	0	0.0575071	0.125913	0.188658	0.0939657	0.0274765	0.144158	0.132082	0.0934836	0	0	0.120902	0	0
ASV183	Bacteria	Pseudomonadota	Unclassified Pseudomonadota	0.104812	0.128036	0.103902	0	0.0952193	0.0880754	0.133293	0.0386644	0.0680843	0.0897089	0.0769012	0	0	0.142829	0.129059	0.0571027	0.107476	0.0992936	0.168907	0.0785901	0.0592847	0.209765	0.182238	0.0969795	0.0837613	0.0555845	0.058265	0.0193961	0.0342865	0.0634015	0.0379952	0.0897036	0.0869628	0.0887253	0.098441	0.192357	0	0.0665221	0.0983405	0.139034	0.0886482	0.0613842	0.107243	0.0673598	0	0
ASV184	Bacteria	Planctomycetota	Planctomycetia	0	0.110577	0.153118	0.103894	0.101786	0.078502	0.171119	0.115993	0.0775844	0.0775861	0.133865	0.101313	0	0	0.161836	0.202056	0.109864	0.089527	0.168907	0.145273	0	0.202532	0	0.112849	0	0.0896159	0.130702	0.0618249	0	0	0	0.0517521	0	0	0.105309	0	0.143511	0	0.0558753	0.122813	0.11766	0.0907975	0	0.0949946	0.0241955	0
ASV185	Bacteria	Pseudomonadota	Unclassified Pseudomonadota	0.0729704	0.0688679	0.108003	0.0481826	0.0569127	0.0746726	0.133293	0.0902169	0	0.0909212	0.0750024	0.114447	0	0.133091	0.0839906	0	0	0.0927825	0.144275	0.0857347	0	0	0	0	0.0892538	0.0691971	0.0992079	0.107891	0.0793488	0	0.0483576	0.0563523	0.13286	0.0591502	0.0824157	0.0998779	0.107633	0.0621837	0.0681678	0.0741513	0.0822011	0.039644	0	0.0621783	0.0610147	0.0990075
ASV186	Bacteria	Chloroflexota	Chloroflexia	0	0.0504384	0.112105	0.177673	0	0.0689285	0.0558388	0.13483	0	0.0836475	0.0949397	0.172608	0	0.0843991	0.151593	0.188878	0	0.0765049	0.0809346	0.178614	0	0.0458107	0.0593333	0.197486	0	0	0.114955	0.116376	0	0	0	0.0172507	0	0	0.0721137	0.147967	0.206725	0.00867679	0.0838129	0.16684	0.156343	0.0345286	0.0753601	0.124357	0.138861	0.0313926
ASV187	Bacteria	Pseudomonadota	Alphaproteobacteria	0.0291882	0.0727477	0.124409	0.0903424	0.0372122	0.0957341	0.0882613	0.0931911	0.0506674	0.0775861	0.0901927	0.153846	0	0.0714147	0.145447	0	0	0.061855	0.0774157	0.169088	0.0340887	0.0650995	0.0699286	0.139298	0.0192239	0.0192844	0.121254	0.101829	0	0	0	0.0264511	0.0289876	0.0230029	0.0824157	0	0.143511	0.0260304	0.0547578	0.104275	0.130555	0.0319709	0.0463755	0.0863588	0.10625	0
ASV188	Bacteria	Actinomycetota	Unclassified Actinomycetota	0.0769506	0.0766276	0.106636	0	0.0383066	0.0804166	0.0558388	0.0912083	0.0364172	0.0703124	0.129118	0.11257	0	0.0746608	0.0655536	0.0527102	0.0214951	0.0455774	0.066859	0	0.0237139	0.0771549	0.0572143	0.0476081	0.0315821	0.0374345	0	0.138197	0.0401642	0	0	0.024151	0.0338189	0.026289	0.0904283	0.118374	0.146928	0.0347072	0.101693	0.0996408	0.0983189	0.0613842	0.118837	0.0777229	0.0904701	0.176282
ASV189	Bacteria	Pseudomonadota	Unclassified Pseudomonadota	0.0610298	0.0746877	0.0792935	0.0436655	0.0601961	0.145516	0.0558388	0.0436214	0.0649176	0.081223	0.0939903	0.0337711	0.110452	0	0.129059	0.12299	0.138524	0.0992936	0.232247	0.111931	0.0815165	0.113321	0.118667	0.0687673	0.081015	0.142932	0.0488166	0	0.0186127	0.0792519	0.0742634	0.074753	0.0579752	0.0492918	0.0618118	0.0776828	0.0854234	0.0636298	0.0782254	0.111227	0.0612478	0.05499	0.173908	0.0759957	0	0
ASV190	Bacteria	Pseudomonadota	Gammaproteobacteria	0	0.0795375	0.18593	0.0903424	0	0.114881	0.109876	0.101122	0	0.104256	0.148106	0.0619137	0	0.0714147	0.206904	0.184486	0	0.0569717	0.175945	0.150036	0	0.0699216	0.1335	0.148114	0	0	0.177944	0.0872822	0	0	0	0.0172507	0	0	0.0938623	0.281138	0.11105	0	0.120691	0.185378	0.119272	0.0255768	0.0898525	0.107085	0.0231435	0
ASV191	Bacteria	Pseudomonadota	Unclassified Pseudomonadota	0	0	0.10937	0.127985	0	0.078502	0.07205	0.146726	0	0.0569773	0.118675	0.135084	0	0	0.139301	0.193271	0	0.0813882	0	0.126221	0	0.0892104	0.141976	0.176326	0	0	0.160622	0.187899	0	0	0	0	0	0	0.081271	0.0739836	0.201599	0	0.0659328	0.127448	0.104766	0	0	0.174445	0.097834	0.0724445
ASV192	Bacteria	Nitrospinota	Nitrospinia	0.0689902	0.0611081	0.113472	0.0496883	0.0766133	0.116796	0.162113	0.0475869	0.0649176	0.126077	0.0958891	0	0	0.162306	0.106525	0	0.117029	0.096038	0.168907	0.111931	0.0666953	0.139843	0.171643	0.0564245	0.0686568	0.0714658	0.0740123	0	0	0.0396259	0	0.0667027	0	0.0657225	0.0892837	0.103577	0.051254	0.0621837	0.102811	0.0926891	0.0612478	0.0716149	0.159416	0.100176	0	0
ASV193	Archaea	Methanobacteriota	Unclassified Methanobacteriota	0	0.0475285	0.188664	0.162616	0	0.078502	0.0684475	0.154658	0	0.120016	0.200323	0.108818	0	0	0.137253	0.250373	0	0	0	0.107168	0	0	0.0635714	0.130482	0	0	0.184243	0.0739475	0	0	0	0	0	0	0.119045	0	0.134969	0	0.0681678	0.15062	0.249827	0	0.101446	0.25044	0.0557548	0
ASV194	Bacteria	Pseudomonadota	Unclassified Pseudomonadota	0.0358218	0.0698378	0.121674	0.114434	0.0328343	0.0689285	0.093665	0.102114	0	0.055765	0.0769012	0.150094	0	0	0.106525	0	0	0.0439496	0	0.121457	0	0.0964436	0.101714	0.0863999	0	0	0.100783	0.207295	0	0	0	0	0	0	0.0434972	0.151666	0.1008	0	0.0581103	0.162206	0.103154	0.0319709	0.0637663	0.0932675	0.124133	0.161793
ASV195	Bacteria	Pseudomonadota	Alphaproteobacteria	0	0	0	0.56464	0	0	0	0.459016	0	0	0	0.165103	0	0.0486918	0	0.347009	0	0.315786	0	0.204811	0	0.0554551	0	0	0	0	0	0	0	0.346727	0	0.315113	0.0434814	0	0	0	0	0	0	0.0834202	0.0693068	0	0.0927509	0.157173	0	0
ASV196	Bacteria	Chloroflexota	Chloroflexia	0	0	0.0669893	0.171651	0	0.0804166	0.02882	0.118967	0	0.0230334	0.0920915	0.232645	0	0	0.0798935	0.149346	0	0.0488329	0	0.123839	0	0	0.0784048	0.181616	0	0	0.100783	0.272757	0	0	0	0.025301	0	0	0.0320505	0.147967	0.0905488	0.0231381	0.0569928	0.0741513	0.0934836	0	0	0.103631	0.197772	0.212504
ASV197	Bacteria	Pseudomonadota	Alphaproteobacteria	0.0888912	0.0824474	0.00683564	0.00301141	0.120392	0.101478	0.0828575	0.00793116	0.118752	0.0654633	0.0351277	0.00562852	0.290664	0.0746608	0.0737478	0	0.114641	0.0976658	0.0985291	0.0738271	0.0889271	0.0916215	0.0699286	0.0511347	0.0782688	0.103228	0.0503913	0.00363676	0.0617157	0.101046	0.126075	0.0954539	0.103872	0.13966	0.0732584	0	0.0153762	0.0997831	0.0659328	0.0602479	0.00644714	0.167528	0.0811571	0.039725	0.0094678	0
ASV198	Bacteria	Verrucomicrobiota	Unclassified Verrucomicrobiota	0.12206	0.0853573	0.0519509	0.0165628	0.11492	0.116796	0.109876	0.0257763	0.0918346	0.0994072	0.0408241	0	0.122079	0.0973836	0.0348254	0	0.0835921	0.0878992	0.066859	0.0404858	0.0993019	0.0747438	0.0508572	0.0193959	0.11397	0.128185	0.0377935	0	0.123431	0.118878	0.120894	0.116155	0.144938	0.105156	0.077837	0	0	0.0896602	0.0447002	0.0602479	0	0.0907975	0.0608678	0.00863588	0	0
ASV199	Bacteria	Pseudomonadota	Alphaproteobacteria	0.0424555	0.096027	0.117573	0.0647454	0.0317398	0.0746726	0.0900625	0.0852599	0.0665009	0.0836475	0.104434	0.0300188	0	0.110368	0.0798935	0.127383	0.0334368	0.113943	0.066859	0.0857347	0.0711417	0.144665	0.135619	0.104033	0.0329553	0.0453751	0.0787364	0.0278818	0.0480011	0	0	0.0782032	0	0.0755808	0.130492	0.162764	0.076881	0.0419378	0.0715204	0.148303	0.0983189	0.0319709	0.0695632	0.0449066	0.0094678	0
ASV200	Archaea	Methanobacteriota	Unclassified Methanobacteriota	0	0	0	0.124974	0	0	0	0.0812944	0	0	0.0360771	0.172608	0	0	0	0	0	0	0	0	0	0	0	0	0	0	0	0.280031	0	0	0	0	0	0	0	0	0.0683387	0	0	0.0208551	0.0838128	0	0	0.0500881	0.366088	0.499867
ASV201	Bacteria	Chloroflexota	Chloroflexia	0.0636833	0.0785675	0.042381	0	0.107259	0.105307	0.0990688	0	0.0775844	0.100619	0.050318	0	0.133705	0.123353	0	0	0.114641	0.117199	0.144275	0.0857347	0.137837	0.207354	0.122905	0	0.142806	0.0771377	0.0881848	0	0	0.0634015	0.113986	0.110404	0.111119	0.0870823	0.116756	0.155366	0	0.0925524	0.106163	0	0	0.0613842	0.110142	0	0	0
ASV202	Bacteria	Chloroflexota	Chloroflexia	0	0	0.0984333	0.201765	0	0	0	0.186382	0	0	0.0560144	0.337711	0	0	0	0	0	0	0	0	0	0	0	0.0863999	0	0	0.075587	0.357615	0	0	0	0	0	0	0	0	0.177681	0	0	0	0.114437	0	0	0	0.320853	0.241482
ASV203	Bacteria	Pseudomonadota	Gammaproteobacteria	0.112772	0.0834174	0.179094	0	0	0.12254	0.0270188	0	0.0237503	0	0.0123422	0	0	0	0	0	0	0	0.0140756	0	0	0	0.0254286	0.0193959	1.55302	0.0170157	0	0.0775842	0	0	0.00863528	0	0	0	0	0	0.0375863	0	0.221266	0	0	0	0	0	0	0
ASV204	Bacteria	Chloroflexota	Chloroflexia	0	0	0.0902305	0.167133	0	0	0	0.0713804	0	0	0.0617108	0.273921	0	0	0.0553109	0.166916	0	0	0	0	0	0	0	0.151641	0	0	0.0850354	0.20972	0	0	0	0	0	0	0	0.210853	0.150345	0	0	0.111227	0.11766	0	0	0.0949946	0.214604	0.280119
ASV205	Bacteria	Pseudomonadota	Deltaproteobacteria	0.110119	0.0727477	0	0	0.0952193	0.0536111	0.0918638	0	0.0870846	0.0412176	0.0237349	0	0.162772	0.0681685	0.0204855	0	0.148077	0.0830159	0.0738968	0.0309598	0.152658	0.0843882	0.0360238	0	0.0837613	0.176963	0	0	0.192004	0.180298	0.196884	0.0713029	0.159432	0.110085	0.0686797	0	0	0.112798	0.0648153	0	0	0.10998	0.0753601	0	0	0
ASV206	Bacteria	Actinomycetota	Unclassified Actinomycetota	0.134	0.0814775	0	0	0.0941249	0.0746726	0.0666463	0	0.0791678	0.0521282	0.0237349	0	0.191838	0.11686	0	0	0.109864	0.113943	0.109086	0	0.120052	0.0916215	0.0614524	0	0.159284	0.125916	0	0	0.0499603	0.116896	0.108805	0.097754	0.140107	0.154448	0.112177	0	0	0.109906	0.118456	0.0393929	0	0.139393	0.0811571	0	0	0
ASV207	Bacteria	Chloroflexota	Chloroflexia	0	0.0368589	0.120307	0.182191	0.0273619	0.0287202	0.036025	0.164572	0	0	0.0825976	0.21576	0	0	0.0655536	0.0878503	0	0	0	0.0785901	0.050392	0	0.0529762	0.132245	0.0315821	0	0.0818859	0.298214	0	0	0	0	0	0.0394335	0	0.0739836	0.129844	0	0.0234676	0	0.0773657	0.0319709	0	0.0846316	0.304022	0.0555408
ASV208	Bacteria	Chloroflexota	Dehalococcoidia	0.13798	0.0436486	0	0.0888367	0.0798967	0	0	0.0465956	0.0791678	0.107893	0.0465205	0.144465	0	0	0.151593	0	0.0859804	0.0927825	0	0	0.133391	0.101266	0	0.0863999	0.0549254	0.0578533	0	0.0254573	0	0	0.100169	0.0897036	0	0.0591502	0.077837	0	0	0.0708604	0	0	0.148284	0.0754514	0	0.136447	0.10099	0.0869334
ASV209	Bacteria	Pseudomonadota	Alphaproteobacteria	0	0	0.0724578	0.105399	0	0	0	0.0971567	0	0	0.055065	0.232645	0	0	0.108573	0	0	0	0	0.0428673	0	0	0	0.123428	0	0	0.108656	0.278818	0	0	0	0	0	0	0	0.140569	0.175972	0	0	0.0718341	0.103154	0	0	0.0621783	0.273514	0.304267
ASV210	Bacteria	Chloroflexota	Chloroflexia	0.045109	0.0436486	0.0519509	0.0557111	0.0251729	0.0727579	0.0522363	0.143752	0.0554175	0.072737	0.0816482	0.0562852	0	0.0389535	0.114719	0.0439252	0.119417	0.12371	0.0246323	0.200048	0.0844807	0.0747438	0.0678095	0.059951	0.0370747	0.0544502	0.122829	0	0.0617157	0.0435885	0.0328141	0.0460019	0.0362345	0.0492918	0.133926	0.0221951	0.0888403	0.0477223	0.0771079	0.0718341	0.116049	0.0345286	0.0579693	0.069087	0	0
ASV211	Bacteria	Acidobacteriota	Unclassified Acidobacteriota	0.0875645	0.0678979	0.117573	0.051194	0.0372122	0.0804166	0.0954663	0.0257763	0.0649176	0.100619	0.0522168	0	0.0813859	0.113614	0.0983304	0	0.062097	0.0911547	0.130199	0.0976423	0.0578026	0.115732	0.0847619	0.0440816	0.0878807	0.0294938	0.0897595	0.0436411	0	0.0356633	0.0431764	0.073603	0.072469	0.0509349	0.0755477	0.118374	0.0649218	0.0491685	0.124043	0.104275	0.0644714	0.0716149	0.11304	0.069087	0	0
ASV212	Bacteria	Pseudomonadota	Gammaproteobacteria	0	0.109607	0.0410139	0	0.123676	0.0650992	0	0	0	0	0	0	0	0	0	0	0.0453786	0	0	0	0.117087	0	0	0	1.29075	0	0.0141726	0.0363676	0.117554	0	0	0	0	0.499491	0	0	0	0	0	0	0	0	0	0.0621783	0	0
ASV213	Bacteria	Planctomycetota	Planctomycetia	0.025208	0.0484985	0.0874962	0.0978709	0.0284564	0.0516964	0.0594413	0.080303	0.022167	0.0581896	0.074053	0.210131	0	0.0681685	0.0901362	0.0878503	0	0.034183	0.0563023	0.0785901	0.0163033	0.0409885	0.0635714	0.0705306	0.0219702	0	0.0472419	0.207295	0	0	0	0.0161007	0	0	0.0389185	0.0702845	0.116176	0.0159074	0.0413477	0.0880547	0.127331	0	0	0.0708142	0.165161	0.140059
ASV214	Bacteria	Pseudomonadota	Alphaproteobacteria	0.0318416	0.0494685	0.0574194	0.0542054	0.0175116	0.0631845	0.0558388	0.0436214	0.0744177	0.0303071	0.0816482	0.0787992	0	0.146075	0.0655536	0.430466	0	0.0878992	0.102048	0.0500119	0.0563205	0.0964436	0.101714	0.0493714	0.081015	0.0385689	0.0692881	0.11274	0	0	0	0.0368015	0.113535	0.0657225	0.0434972	0.166463	0.0871318	0.0563991	0.0223501	0.0602479	0.0531889	0.0281344	0.159416	0.0328163	0.0715345	0.0652001
ASV215	Bacteria	Planctomycetota	Unclassified Planctomycetota	0	0.0261892	0.0396467	0	0	0	0	0.070389	0	0	0.0379759	0.170732	0	0	0.0676022	0	0	0	0	0.0690641	0	0	0	0.067004	0	0	0.075587	0.181838	0	0	0	0	0	0	0	0.103577	0.0939657	0	0	0	0.0757539	0	0	0.0500881	0.213552	0.712371
ASV216	Bacteria	Pseudomonadota	Gammaproteobacteria	0.0875645	0.0727477	0.0628879	0	0.0678575	0.0631845	0.0900625	0.0128881	0.0665009	0.064251	0.0560144	0	0	0.230475	0	0	0.128971	0.0748771	0.130199	0.0809717	0.0859629	0.122966	0.103833	0.0405551	0.0645374	0.0726002	0.0409429	0	0.0979614	0.0594389	0.060447	0.098904	0.0917941	0.0969406	0.0938623	0	0	0.0694143	0.0670503	0.0602479	0	0.0831245	0.0782586	0	0	0
ASV217	Bacteria	Actinomycetota	Acidimicrobiia	0.084911	0.0805075	0	0	0.0831801	0.0382936	0.04323	0	0.0744177	0.0242457	0	0	0.238344	0.0746608	0	0	0.114641	0.061855	0	0	0.133391	0.0506329	0.0699286	0	0.142806	0.149738	0	0	0.227271	0.158504	0.183068	0.098904	0.125613	0.0788669	0.0709691	0	0	0.0853218	0.0569928	0	0	0.0677784	0.0637663	0	0	0
ASV218	Bacteria	Bacteroidota	Unclassified Bacteroidota	0.0398021	0.0484985	0.110737	0.124974	0.0240785	0.0536111	0.05764	0.075346	0.0538341	0.0569773	0.108231	0.0825516	0	0.185029	0.0921848	0	0.0477669	0.0374386	0	0.104787	0.025196	0.0723327	0	0.0740571	0.0425672	0.0136125	0.0724375	0.120013	0.0548584	0.0356633	0.0569928	0.0333514	0.0314032	0.0328612	0.0469312	0	0.102508	0.0274765	0.0547578	0.0950064	0.0805893	0.0447593	0	0.0846316	0.0326113	0
ASV219	Archaea	Thermoproteota	Unclassified Thermoproteota	0	0.0368589	0.114839	0.0993766	0.0284564	0.0708432	0.0324225	0.0674148	0.0253337	0.0763738	0.114877	0.108818	0	0.0876453	0.135204	0.224018	0	0.0830159	0.0703779	0.0547749	0.0207497	0.079566	0.105952	0.137535	0	0	0.0913343	0.08607	0	0	0	0.0299012	0	0.0361473	0.113322	0.0961787	0.0580879	0	0.0435827	0.101958	0.143449	0.039644	0.0521724	0.172718	0.046287	0
ASV220	Bacteria	Pseudomonadota	Unclassified Pseudomonadota	0.0995051	0.0814775	0	0	0.10507	0.112966	0.0954663	0	0.118752	0.0715247	0	0	0	0.146075	0	0	0.169572	0.161149	0	0	0.0918913	0.17601	0.1335	0	0.0741493	0.0782721	0	0	0.0617157	0.108971	0.0863528	0.0908537	0.140107	0.0936545	0.0663904	0	0	0.0679682	0.0480527	0	0	0.0959128	0.144923	0	0	0
ASV221	Bacteria	Chloroflexota	Chloroflexia	0.06501	0.0475285	0	0.0843196	0.0197006	0.0306349	0.0252175	0.0386644	0.026917	0.0787984	0.0427229	0.153846	0.0406929	0.0876453	0.0471167	0	0.0453786	0.0520884	0.0633401	0.0690641	0.037053	0.0433996	0.0572143	0.0740571	0.0398209	0.0340314	0.0614144	0.0836455	0.043103	0	0.0466305	0.0471519	0.0314032	0.0377904	0.0675351	0.0961787	0	0.0563991	0.0447002	0.0973236	0.09026	0.05499	0.0492739	0.098449	0.150433	0
ASV222	Bacteria	Acidobacteriota	Unclassified Acidobacteriota	0	0	0.106636	0.0978709	0	0.0459524	0.064845	0.0991395	0	0.0424299	0.105383	0.0863039	0	0	0.139301	0.153738	0	0.0390663	0.12668	0.126221	0	0.0843882	0.116548	0.193959	0	0	0.148025	0.100617	0	0	0	0	0	0	0.091573	0.196057	0.105925	0	0.0581103	0.155254	0.116049	0	0.086954	0.122629	0.0452351	0
ASV223	Bacteria	Bacteroidota	Unclassified Bacteroidota	0	0	0	0.158099	0	0.0134028	0	0.176468	0	0	0	0.0412758	0	0.103876	0	0.0878503	0	0.302764	0	0.0690641	0	0.190476	0	0	0	0	0	0.0775842	0	0.166429	0	0.163307	0	0	0	0	0	0	0	0.264164	0.0693068	0	0.0318831	0.835953	0	0
ASV224	Archaea	Methanobacteriota	Unclassified Methanobacteriota	0	0.0805075	0.143549	0	0	0.08999	0.0846588	0.0485783	0	0.135776	0.118675	0	0	0.207752	0.0983304	0	0	0.0878992	0.165388	0.0881162	0	0.192887	0.105952	0.0617142	0	0	0.132277	0	0	0	0	0	0	0	0.101875	0.114675	0.080298	0	0.0849304	0.0996408	0.112825	0.0677784	0.136228	0.129538	0	0
ASV225	Bacteria	Pseudomonadota	Gammaproteobacteria	0	0	0	0	0	0	0	0	0	0	0	0	0	0	0	0	0	0	0	0	0	0	0	0	0	0	0	0	0	0	0	0	0	0	0	0	0	0	0	0	0	0	0	0	1.41701	0.403274
ASV226	Bacteria	Unclassified Bacteria	Unclassified Bacteria	0	0.120276	0.073825	0.0436655	0.0404956	0.0402083	0.136895	0.0505611	0.0538341	0.0957703	0.0806988	0	0	0.0519379	0.0348254	0.0483177	0.0788154	0.0472051	0.0633401	0.0452489	0.0207497	0.0723327	0.0317857	0.0405551	0.100239	0.0771377	0.0188967	0.0351554	0.114615	0.0614202	0.062174	0.0402516	0.0869628	0.0427196	0.0766924	0.155366	0.0341693	0.0419378	0.0547578	0.050979	0.0209532	0.0537112	0	0.0259076	0	0
ASV227	Bacteria	Pseudomonadota	Gammaproteobacteria	0.0663368	0.0611081	0.073825	0.025597	0.0492514	0.0708432	0.0612425	0.032716	0.110835	0.0569773	0.0541156	0.0412758	0	0.0746608	0.0471167	0.0571027	0.062097	0.0537162	0.0985291	0.10955	0.0548384	0.0819771	0.0699286	0.0370285	0.0659105	0.0249563	0.0425177	0.0242451	0.0205719	0.0376446	0.0552658	0.0460019	0.0555596	0.0870823	0.0732584	0.0332926	0.0529625	0.0361533	0.088283	0.0926891	0.0515771	0.0831245	0.0695632	0.0656327	0.0189356	0
ASV228	Bacteria	Pseudomonadota	Alphaproteobacteria	0.0371486	0.0581982	0.0710907	0.0451712	0.0404956	0.0574405	0.0846588	0.0495697	0.0475007	0.0533404	0.0788	0.0619137	0	0.0454457	0.0737478	0.0834578	0	0.0488329	0.0527834	0.0738271	0.0414993	0.0964436	0.101714	0.059951	0.0247164	0.0340314	0.121254	0.0484901	0	0	0.0241788	0.0195508	0.0434814	0.0394335	0.0663904	0.125772	0.117884	0.0477223	0.0480527	0.0671996	0.0709186	0.0217402	0.0492739	0.0656327	0.0610147	0
ASV229	Bacteria	Candidatus Poribacteriota	Unclassified candidatus Poribacteriota	0.132674	0.0756576	0	0	0.0755188	0.137857	0.156709	0	0.123502	0.081223	0	0	0	0.107122	0	0	0.112252	0.0911547	0	0	0.0681774	0.163954	0.116548	0	0.107105	0.0283595	0	0	0.0293884	0.0297194	0	0.0931538	0.123197	0.0903684	0.095007	0	0	0.0650759	0.103928	0	0	0.10998	0.127533	0	0	0
ASV230	Bacteria	Chloroflexota	Chloroflexia	0.0358218	0.0446186	0.0874962	0.0752853	0.0689519	0.0574405	0.0306213	0.0674148	0.0332505	0.0400053	0.0882939	0.0806754	0.0930124	0.0649224	0.118816	0.10542	0	0.061855	0.0598212	0.0523934	0.0548384	0.0578662	0.0487381	0.0811102	0.0260896	0.0192844	0.0850354	0.0751597	0	0.0455698	0	0.0184007	0.045897	0.0197167	0.0480758	0.0702845	0.0580879	0.0260304	0.0692854	0.111227	0.114437	0.0255768	0.0521724	0.0863588	0.0389232	0.0169037
ASV231	Bacteria	Pseudomonadota	Unclassified Pseudomonadota	0.0689902	0.0669279	0.105269	0	0.0580072	0.0823313	0.0756525	0	0.0554175	0.0703124	0.0294313	0	0.104639	0.110368	0	0.0966353	0.0740387	0.0699938	0.0809346	0.0809717	0.0340887	0.0916215	0.0805238	0.0863999	0.0521792	0.0283595	0.0992079	0	0.0568176	0.0435885	0.0552658	0.0839534	0.0628065	0.0607933	0.0618118	0.0961787	0	0.0419378	0.0558753	0.101958	0.0612478	0.0767303	0.115939	0	0	0
ASV232	Bacteria	Pseudomonadota	Gammaproteobacteria	0	0.0252192	0.0779263	0.115939	0	0	0	0.113019	0	0.0206088	0.055065	0.142589	0	0	0.114719	0.109813	0	0	0.0774157	0.0523934	0	0	0	0.0969795	0	0	0.0740123	0.178201	0	0	0	0	0	0	0	0.144268	0.104216	0	0	0.0671996	0.0870364	0	0	0.0552696	0.137809	0.243897
ASV233	Bacteria	Chloroflexota	Chloroflexia	0.100832	0.0465585	0	0	0.10507	0	0	0	0.0918346	0	0	0	0.156958	0	0	0	0.157631	0.0585995	0	0	0.130426	0	0	0	0.0933732	0.1452	0	0	0.226291	0.202092	0.169251	0.0793532	0.125613	0.119943	0.0228932	0	0	0.128706	0.0122926	0	0	0.102307	0	0	0	0
ASV234	Bacteria	Pseudomonadota	Unclassified Pseudomonadota	0	0	0.0492166	0.106905	0	0	0	0.0793116	0	0	0.0797494	0.161351	0	0.0746608	0.0737478	0	0	0	0	0.130984	0	0	0.0466191	0.100506	0	0	0.0661386	0.14547	0	0	0	0	0	0	0	0	0.0888403	0	0	0.0950064	0.0854246	0	0	0.107085	0.19672	0.212504
ASV235	Bacteria	Planctomycetota	Planctomycetia	0.06501	0.064018	0.0683564	0.0301141	0.0623851	0.0631845	0.079255	0	0	0.100619	0.0474699	0.0337711	0.151145	0.107122	0.0512138	0	0.0788154	0.0390663	0.066859	0.0881162	0.0414993	0.0867993	0.0572143	0.0317388	0.0411941	0	0.0330693	0.0303063	0.0293884	0.0574576	0	0	0.0700534	0.0739378	0.0686797	0.0591869	0	0.0636298	0.0715204	0.081103	0.0257886	0.0524323	0.0666647	0.0310892	0.0273514	0.0507112
ASV236	Bacteria	Chloroflexota	Chloroflexia	0.112772	0.0271592	0	0	0.102881	0	0	0	0.0902513	0.0230334	0	0	0.191838	0	0	0	0.128971	0.034183	0	0	0.157105	0	0	0	0.0851344	0.136125	0	0	0.201801	0.172373	0.238334	0.0897036	0.113535	0.124873	0	0	0	0.12726	0	0	0	0.0728938	0	0	0	0
ASV237	Archaea	Methanobacteriota	Unclassified Methanobacteriota	0	0.0678979	0.161321	0.171651	0	0	0	0.139787	0	0	0.132916	0.0938086	0	0	0.167981	0	0	0.089527	0	0	0	0.139843	0.148333	0.0581877	0	0	0.0771617	0.0727352	0	0	0	0	0	0	0.146517	0.332926	0	0	0	0.176109	0.149896	0	0	0	0.0231435	0
ASV238	Bacteria	Pseudomonadota	Unclassified Pseudomonadota	0	0	0.0519509	0.0948595	0	0.0287202	0.04323	0.104096	0	0	0.0541156	0.135084	0	0	0.0532623	0	0	0	0	0.0523934	0	0	0	0.0511347	0	0	0.075587	0.169715	0	0	0	0	0	0	0	0	0.0580879	0	0.0312902	0.050979	0.0757539	0	0	0.039725	0.0873142	0.224578
ASV239	Bacteria	Planctomycetota	Unclassified Planctomycetota	0.0543961	0.0552883	0.0765592	0.0692625	0.0372122	0.0746726	0.0666463	0.0941825	0.0506674	0.0872844	0.069306	0.0450281	0	0.0681685	0.0778449	0.0790653	0.0382135	0.0358108	0.0598212	0.0476304	0.0192675	0.0409885	0.0445	0.0299755	0.0398209	0.0374345	0.0614144	0	0.0411438	0.0178317	0.0345411	0.050602	0.0579752	0.026289	0.0377739	0.0887804	0.0734641	0.0491685	0.0547578	0.113544	0.0918718	0.0294133	0.0405785	0.058724	0	0
ASV240	Bacteria	Acidobacteriota	Unclassified Acidobacteriota	0.155228	0.0203694	0	0	0.0908414	0	0	0	0.107668	0	0	0	0.209278	0	0	0	0.133747	0	0	0	0.108195	0	0	0	0.131821	0.144066	0	0	0.207678	0.144635	0.214155	0.0931538	0.142522	0.10187	0	0	0	0.148952	0	0	0	0.0409228	0	0	0	0
ASV241	Archaea	Thermoproteota	Unclassified Thermoproteota	0.0119406	0.0174595	0.0642551	0.109917	0.0186061	0.0382936	0.0162113	0.065432	0.0174169	0.0363685	0.0446217	0.103189	0.0639461	0.0421996	0.0430196	0.10542	0.0453786	0.0292997	0.035189	0.0404858	0.0400172	0.0482218	0.0466191	0.0546612	0.0247164	0.0294938	0.0661386	0.0884945	0	0	0	0.024151	0.0169094	0.054221	0.0366292	0.0591869	0.0392947	0.021692	0.0245851	0.0625652	0.0709186	0.0281344	0.0289847	0.0811772	0.154641	0.106252
ASV242	Bacteria	Planctomycetota	Unclassified Planctomycetota	0.123386	0.0562582	0	0	0.064574	0.0823313	0.0756525	0	0.0823345	0.0763738	0.0180385	0	0.0581328	0.107122	0.059408	0	0.114641	0.0748771	0.102048	0	0.102266	0.0699216	0	0	0.0892538	0.0907503	0	0	0.0705322	0.0851958	0.0794446	0.0598024	0.113535	0.0558641	0.0732584	0.0295935	0	0.0592914	0.0413477	0	0	0.05499	0.0927509	0	0	0
ASV243	Bacteria	Verrucomicrobiota	Verrucomicrobiia	0	0.0504384	0.0710907	0.0526997	0	0.0497817	0.142299	0.0822858	0	0.0363685	0.0806988	0.0825516	0	0	0	0	0	0	0	0	0	0	0	0.0546612	0	0	0.0724375	0.090919	0	0	0	0	0	0	0.0457865	0.133171	0.0563794	0	0.0413477	0	0.0548007	0	0	0	0.124133	0.152133
ASV244	Bacteria	Chloroflexota	Chloroflexia	0.0504159	0.0931171	0	0	0.0820856	0.0804166	0.0486338	0	0.0364172	0.0606141	0.0227855	0	0	0.0941375	0.018437	0	0.0716503	0.115571	0.0563023	0	0.128944	0.13261	0.0614524	0	0.060418	0.0340314	0.0409429	0	0.0548584	0.0475511	0.0673552	0.0885536	0.0531439	0.0870823	0.081271	0	0	0.0535069	0.112868	0	0	0.094634	0.0318831	0	0	0
ASV245	Bacteria	Chloroflexota	Chloroflexia	0	0	0	0.149065	0	0	0	0.0693976	0	0	0	0.174484	0	0	0	0	0	0	0	0	0	0	0	0.059951	0	0	0.0708628	0.213357	0	0	0	0	0	0	0	0	0.114467	0	0	0	0.122496	0	0	0.0552696	0.192512	0.301852
ASV246	Bacteria	Acidobacteriota	Unclassified Acidobacteriota	0.123386	0.0746877	0	0	0.103975	0	0.0396275	0	0.101335	0.0339439	0	0	0.0988257	0.0454457	0	0	0.138524	0.0553439	0	0	0.0963377	0.026522	0.0466191	0	0.109851	0.0941534	0	0	0.0969818	0.0792519	0.0828987	0.0954539	0.123197	0.0690086	0.0503651	0	0	0.0954447	0.0502878	0	0	0.0767303	0.0550709	0	0	0
ASV247	Bacteria	Unclassified Bacteria	Unclassified Bacteria	0.0676635	0.0611081	0.0546852	0	0.0777077	0.0823313	0.0684475	0	0.093418	0.0933458	0.0531662	0	0	0.0941375	0.059408	0.0307476	0.0525436	0.0716216	0.0633401	0.0547749	0.050392	0.0650995	0.0275476	0	0.0535523	0.0397032	0.0488166	0	0.0117554	0.0178317	0.0172706	0.0517521	0.0531439	0.0410765	0.0824157	0	0	0.0535069	0.100576	0.0532963	0.0628596	0.10998	0.115939	0	0	0
ASV248	Bacteria	Nitrospinota	Nitrospinia	0.0464357	0.0475285	0.0628879	0.0271027	0	0.084246	0.0810563	0.0862513	0.049084	0.0533404	0.069306	0	0	0.103876	0.129059	0	0	0.0716216	0.147794	0.0904977	0.0281602	0.0747438	0.0805238	0.112849	0.0260896	0	0.0866101	0	0	0	0	0.0379515	0	0.0361473	0.0618118	0.162764	0.105925	0	0.0636978	0.148303	0.04513	0	0.104345	0.0725414	0	0
ASV249	Bacteria	Pseudomonadota	Deltaproteobacteria	0.0318416	0.0746877	0.0874962	0.0526997	0.0317398	0.0670139	0.0954663	0.0188365	0.0475007	0.0581896	0.0446217	0	0	0.126599	0.0983304	0	0.0812037	0.0716216	0.0844535	0.059538	0.0474278	0.0650995	0.0699286	0.0634775	0.0398209	0.0340314	0.0566902	0	0.0274292	0	0	0.0448518	0.0410658	0.0394335	0.0709691	0	0.0529625	0.0491685	0.0569928	0.0950064	0.0580243	0.0409228	0.0956494	0.0569968	0	0
ASV250	Bacteria	Chloroflexota	Chloroflexia	0.0464357	0.0407387	0.0464824	0.0496883	0.0240785	0.036379	0.0540375	0.0356902	0.0237503	0.0594019	0.0427229	0	0.0465062	0.0454457	0.0573594	0.0527102	0.0573203	0.0439496	0.0985291	0.100024	0.0829986	0.0771549	0.0995953	0	0.050806	0.0555845	0.0330693	0.0278818	0.0411438	0.019813	0.0500846	0.0655527	0.0386501	0.0821531	0.0526545	0.0258943	0.0751726	0.0520607	0.0469352	0.0370757	0.0499653	0.0447593	0.0376801	0.0431794	0.0399752	0
ASV251	Bacteria	Pseudomonadota	Unclassified Pseudomonadota	0	0.0300691	0.0656222	0.0888367	0	0	0.0306213	0.105088	0	0.0387931	0.0560144	0.121951	0	0.025969	0.0737478	0.149346	0	0	0	0.0619195	0	0.0313442	0.0296667	0.0987428	0	0	0.0566902	0.132136	0	0	0	0	0	0	0.0137359	0.0739836	0.117884	0	0.0189976	0.0486618	0.128943	0	0	0.0898131	0.112562	0.149719
ASV252	Bacteria	Pseudomonadota	Deltaproteobacteria	0.0676635	0.0475285	0.0464824	0.0346313	0.0415901	0.0402083	0.0486338	0.037673	0.049084	0.0448545	0.0493687	0.054409	0.0697593	0.0616763	0.0471167	0.0746728	0.0358252	0.0358108	0.0633401	0.0238152	0.0563205	0.053044	0.042381	0.0405551	0.0274627	0.0794065	0.0551155	0.0509146	0.0705322	0.0396259	0.101896	0.048302	0.0507283	0.0427196	0.0412078	0.0443902	0.0461286	0.0477223	0.0547578	0.050979	0.0628596	0.0345286	0.0521724	0.0172718	0	0
ASV253	Bacteria	Pseudomonadota	Alphaproteobacteria	0	0	0.0259754	0.0451712	0	0	0	0.0921997	0	0	0.00854457	0.103189	0	0	0.0163884	0.0351401	0	0	0	0	0	0	0	0.093453	0	0	0.0220462	0.224267	0	0	0	0	0	0	0	0	0.0205016	0	0.0100576	0	0.0370711	0	0	0	0.232487	0.367052
ASV254	Bacteria	Chloroflexota	Chloroflexia	0.0769506	0.0252192	0	0	0.0820856	0	0	0	0.0870846	0	0	0	0.168585	0	0	0	0.138524	0.0504607	0	0	0.121534	0	0	0	0.0714031	0.120244	0	0	0.214536	0.162466	0.221063	0.110404	0.0893785	0.124873	0	0	0	0.120029	0	0	0	0.0588265	0	0	0	0
ASV255	Archaea	Unclassified Archaea	Unclassified Archaea	0.0172476	0.0446186	0.0861291	0.076791	0.0109448	0.084246	0.0324225	0.075346	0.0190003	0.0921335	0.0731036	0.0562852	0	0.0616763	0.0839906	0.0966353	0.00716503	0.0455774	0.0387079	0.059538	0.0222318	0.0602773	0.0614524	0.0722938	0	0.00794065	0.0850354	0.0387921	0	0.00594389	0	0.0207008	0.0241563	0.0197167	0.0766924	0.0554877	0.0666302	0.0144613	0.0491703	0.0857375	0.0773657	0.0306921	0.0927509	0.141628	0.0178836	0
ASV256	Bacteria	Nitrospinota	Nitrospinia	0.0689902	0.064988	0	0	0.0394011	0.078502	0.108075	0	0.0348338	0.0921335	0.0408241	0	0	0.168798	0	0	0.107476	0.102549	0.19002	0.0571565	0.0607668	0.120555	0.125024	0	0.0768956	0.0533158	0	0	0.0244904	0.0277382	0.0431764	0.0828034	0.0893785	0.0460057	0.0583778	0	0	0.0361533	0.0748729	0	0	0.0664996	0.107243	0	0	0
ASV257	Bacteria	Candidatus Binatota	Candidatus Binatia	0	0.0669279	0.0642551	0.109917	0.0492514	0.134028	0.08646	0.0346988	0.0348338	0.064251	0.0731036	0	0	0.0421996	0.059408	0.0614952	0	0.0651105	0.0809346	0.0762086	0	0.0843882	0.0656905	0.123428	0.0562986	0	0.0881848	0.0218206	0	0	0	0.0379515	0	0	0.0446418	0.0665853	0.0922572	0.0274765	0.088283	0.0926891	0.0515771	0	0.0695632	0.0621783	0	0
ASV258	Archaea	Methanobacteriota	Unclassified Methanobacteriota	0.0809308	0	0	0	0.148849	0.0689285	0	0	0.156752	0.0751615	0	0	0.0988257	0	0	0	0.114641	0.0846437	0	0	0.120052	0	0	0	0.120836	0.0714658	0	0	0	0.0673641	0.0794446	0.0805033	0.13286	0.138017	0.0744031	0	0	0.0925524	0.0335252	0	0	0.108701	0.101446	0	0	0
ASV259	Bacteria	Planctomycetota	Unclassified Planctomycetota	0.114099	0.0775976	0	0	0.0612906	0.0995635	0	0	0.112418	0.0884966	0	0	0	0.149322	0	0	0	0.0927825	0	0	0.0681774	0	0	0	0.0878807	0.187172	0	0	0.0656342	0	0.0828987	0.0448518	0.0917941	0.0509349	0.0629564	0	0	0.0448301	0.0826954	0	0	0.0895186	0.156517	0	0	0
ASV260	Bacteria	Acidobacteriota	Unclassified Acidobacteriota	0.0769506	0.0872973	0.0382796	0	0.0394011	0.0727579	0.127889	0.0128881	0.0570008	0.106681	0.0531662	0	0.0406929	0.10063	0.0286797	0.0527102	0.0406019	0.0765049	0.066859	0.0404858	0.025196	0.0699216	0.0572143	0.0722938	0.0645374	0.0158813	0.051966	0	0	0.033682	0.0362682	0.0471519	0.0386501	0.0427196	0.0515098	0.0998779	0.0239185	0.033261	0.0447002	0.050979	0.0128943	0.0588265	0.0782586	0.0569968	0	0
ASV261	Bacteria	Chloroflexota	Chloroflexia	0	0.0339489	0.0369125	0.108411	0	0.0210615	0.050435	0.0793116	0	0.0412176	0.0636096	0.135084	0	0.0941375	0.0450681	0.101028	0	0.0406941	0.0563023	0.0666825	0	0.0458107	0.0635714	0.0758204	0	0	0.0818859	0.136985	0	0	0	0	0	0	0	0.162764	0.0922572	0	0.0346427	0.0950064	0.125719	0	0	0.0794501	0.0852102	0
ASV262	Bacteria	Pseudomonadota	Unclassified Pseudomonadota	0.124713	0.0261892	0	0	0.0766133	0	0	0	0.0538341	0	0	0	0.110452	0	0	0	0.140912	0	0	0	0.0637311	0	0	0	0.0837613	0.146335	0	0	0.322293	0.160485	0.151981	0.0402516	0.125613	0.0969406	0	0	0	0.0448301	0	0	0	0.0741726	0	0	0	0
ASV263	Bacteria	Chloroflexota	Chloroflexia	0.119406	0.0407387	0	0	0.111636	0	0.0486338	0	0.114002	0	0	0	0.0930124	0.123353	0	0	0.109864	0	0	0	0.117087	0	0	0	0.0892538	0.106632	0	0	0.0734711	0.0951022	0.107077	0.0678527	0.0942097	0.0903684	0.0515098	0	0	0.115691	0.0480527	0	0	0.115095	0	0	0	0
ASV264	Bacteria	Nitrospinota	Nitrospinia	0.0756239	0.0475285	0.0915976	0	0.0394011	0.0938194	0.0954663	0	0.0665009	0.0654633	0.0446217	0	0	0.155814	0.0860391	0	0	0.0813882	0	0	0.0414993	0.108499	0.116548	0	0.0178508	0	0.0944837	0	0	0	0	0.0678527	0	0.0443627	0.0663904	0	0.0666302	0.0491685	0.0793429	0	0	0.0677784	0.156517	0.0829044	0	0
ASV265	Bacteria	Nitrospinota	Nitrospinia	0.111446	0.0523784	0	0	0.0711409	0	0.050435	0	0.0680843	0	0	0	0.197651	0	0	0	0.157631	0	0	0	0.152658	0	0	0	0.0700299	0.0986909	0	0	0.0979614	0.136709	0.162343	0.117305	0.125613	0.115014	0	0	0	0.0954447	0	0	0	0.0728938	0	0	0	0
ASV266	Bacteria	Acidobacteriota	Unclassified Acidobacteriota	0.0809308	0.0659579	0.0478495	0	0.0514403	0.0536111	0.0684475	0	0.0665009	0.0545527	0	0	0.0988257	0.10063	0	0	0.105087	0.0830159	0.123161	0	0.0978198	0.122966	0.0784048	0	0.0920001	0.0499127	0	0	0	0.0693454	0	0.0586524	0.108704	0.0739378	0.0801264	0	0	0.0578453	0.0536403	0.0347584	0	0.0562689	0.0637663	0	0	0
ASV267	Bacteria	Pseudomonadota	Alphaproteobacteria	0	0	0	0.051194	0	0	0	0	0	0	0	0.0938086	0	0	0	0	0	0.0113943	0	0	0	0	0	0	0	0	0	0	0	0.126803	0	0	0.0169094	0	0	0	0	0	0	0	0.09026	0.00383651	2.89267	0	0	0
ASV268	Bacteria	Pseudomonadota	Alphaproteobacteria	0	0.0378288	0.0574194	0.0421598	0.045968	0.0765873	0.07205	0.0713804	0.107668	0.129714	0.103484	0.0225141	0	0.0519379	0	0	0	0.120454	0	0	0.0207497	0.0506329	0.0445	0.0370285	0.0357015	0	0.0850354	0.014547	0	0	0	0	0	0.0328612	0.098441	0	0.0239185	0.0202458	0.088283	0.0486618	0.0789775	0.0460382	0	0.0466337	0	0
ASV269	Bacteria	Chloroflexota	Dehalococcoidia	0.00928715	0.0252192	0.0328111	0.0421598	0.0197006	0	0.021615	0.0307332	0.0253337	0.0133351	0.0161398	0.0562852	0	0	0.0266312	0.0351401	0	0.0374386	0	0	0.0266781	0.026522	0.0339048	0.067004	0.020597	0.0544502	0.0472419	0.109103	0	0	0.060447	0.050602	0.0241563	0.0377904	0.0263272	0.0332926	0.0922572	0.0260304	0.0167626	0.0486618	0.0322357	0.0358075	0.0289847	0.0466337	0.140965	0.0724445
ASV270	Archaea	Thermoproteota	Unclassified Thermoproteota	0.0291882	0.0349189	0.0560523	0.0271027	0.0328343	0.0536111	0.0450313	0.0307332	0.0364172	0.0897089	0.0588626	0.00938086	0	0.0421996	0.040971	0.0614952	0.0406019	0.0537162	0.0563023	0.0309598	0.0400172	0.0699216	0.0911191	0.0617142	0.0494329	0.0374345	0.0724375	0.0121225	0	0	0	0.0368015	0.0193251	0.0377904	0.0629564	0.0369918	0.0341693	0.0520607	0.0525228	0.0671996	0.0564125	0.05499	0.0811571	0.0880859	0	0
ASV271	Bacteria	Pseudomonadota	Gammaproteobacteria	0.0570496	0.0834174	0	0	0.0623851	0.0402083	0	0	0.110835	0.0193965	0	0	0	0.0486918	0	0	0.179126	0	0	0	0	0.0482218	0	0	0.133194	0.125916	0	0	0.162616	0.176335	0.0967151	0.0598024	0.181173	0.0969406	0	0	0	0	0	0	0	0.0703361	0.0347816	0	0	0
ASV272	Bacteria	Chloroflexota	Dehalococcoidia	0.0504159	0	0.0478495	0.0286084	0.0634796	0.0708432	0	0	0.0870846	0.0327316	0	0	0	0	0.0655536	0	0.076427	0.0699938	0	0	0	0	0	0	0.0549254	0.123647	0	0	0.170453	0	0.115713	0.0586524	0.0603908	0.0591502	0.0331952	0	0	0.0780911	0	0.0950064	0	0.0920763	0.0724617	0.0414522	0.0347153	0
ASV273	Bacteria	Pseudomonadota	Gammaproteobacteria	0.0159208	0.0426787	0.0806606	0.0647454	0	0.0516964	0.0396275	0.0465956	0.0205836	0.0618264	0.0920915	0.0318949	0	0.0843991	0.059408	0.0571027	0	0.0406941	0.0950102	0.104787	0	0.0771549	0.0953572	0.093453	0.0164776	0	0.0787364	0.0351554	0	0	0	0.0299012	0	0	0.0572331	0.0739836	0.0717556	0.0173536	0.0379952	0.0996408	0.0580243	0.0166249	0.0579693	0.0414522	0.0189356	0
ASV274	Bacteria	Chloroflexota	Chloroflexia	0.0225545	0.0223093	0.0628879	0.0481826	0.0361177	0.08999	0.0468325	0.0109053	0.049084	0.0412176	0.0379759	0.0637899	0	0.0908914	0.0983304	0.144953	0	0.0537162	0	0.150036	0	0.0771549	0.0275476	0.0476081	0	0.0272251	0.0661386	0.0375799	0	0	0	0.0218509	0	0.0558641	0.0331952	0.199756	0.104216	0.0448301	0.00894005	0.0950064	0.0531889	0.0217402	0.136228	0.0518153	0	0
ASV275	Bacteria	Planctomycetota	Unclassified Planctomycetota	0	0	0.117573	0.108411	0	0	0.131491	0.109053	0	0	0.134814	0.0525328	0	0.0908914	0.0778449	0	0	0	0	0.135747	0	0.0747438	0	0.102269	0	0	0.129128	0.0472779	0	0	0	0	0	0	0	0.159065	0.124718	0	0	0.0834202	0.106378	0	0	0.151991	0	0
ASV276	Bacteria	Chloroflexota	Chloroflexia	0	0	0.042381	0.0692625	0	0	0	0.075346	0	0	0.0607614	0.206379	0	0	0.0471167	0.14056	0	0	0	0	0	0	0.0593333	0.0652408	0	0	0.0283451	0.204871	0	0	0	0	0	0	0	0	0.136677	0	0	0.0880547	0.0693068	0	0	0.0604511	0.146225	0
ASV277	Bacteria	Chloroflexota	Chloroflexia	0.06501	0.0455886	0	0	0.100692	0.084246	0.0666463	0	0.0585842	0.0497036	0	0	0.0988257	0.146075	0	0	0.109864	0.135104	0	0	0.123016	0	0	0	0.0865076	0.0669283	0	0	0.0215515	0	0	0.0598024	0.099041	0.0690086	0.0377739	0	0	0.118583	0.0357602	0	0	0.104865	0.0405785	0	0	0
ASV278	Bacteria	Acidobacteriota	Unclassified Acidobacteriota	0	0.0184294	0.0888634	0.0572169	0	0	0	0.112028	0	0	0.0911421	0.0844278	0	0	0.174127	0.245981	0	0	0	0.130984	0	0	0.0762857	0.116375	0	0	0.114955	0.0703107	0	0	0	0	0	0	0	0.159065	0.126427	0	0	0.0903719	0.10799	0	0	0.122629	0.0368192	0
ASV279	Bacteria	Acidobacteriota	Unclassified Acidobacteriota	0	0.00775976	0.0724578	0.0572169	0	0.0995635	0.0810563	0.0495697	0	0.072737	0.112029	0	0	0	0.11267	0.188878	0	0	0	0.0976423	0	0	0.110191	0.0899265	0	0	0.108656	0	0	0	0	0	0	0	0.0412078	0.170162	0.0973826	0	0.0502878	0.12513	0.0918718	0	0.0811571	0.122629	0	0
ASV280	Bacteria	Pseudomonadota	Alphaproteobacteria	0.0371486	0.0620781	0.0902305	0	0	0.0555258	0	0.0931911	0	0	0.112029	0.0844278	0	0	0.0962819	0	0	0.0765049	0.0879724	0.064301	0	0	0.0720476	0.0511347	0	0	0.110231	0.0606127	0	0	0	0	0	0	0.0858497	0.0850812	0.116176	0	0.0301727	0	0.0822011	0	0	0	0.0599628	0
ASV281	Bacteria	Chloroflexota	Chloroflexia	0.0212278	0.0281291	0.0943319	0.0677568	0	0.0631845	0	0.0406472	0.0300838	0.0691001	0.0702554	0	0	0	0.135204	0.224018	0	0.061855	0	0.0571565	0	0.0867993	0.0995953	0.130482	0	0	0.0393682	0	0	0	0	0.0230009	0	0.0410765	0.0595224	0.159065	0.0495455	0	0.0614628	0.0695169	0.0854246	0	0.0550709	0.0949946	0	0
ASV282	Archaea	Methanobacteriota	Unclassified Methanobacteriota	0	0.0523784	0.105269	0.0557111	0.0197006	0.0650992	0.0630438	0.0505611	0.022167	0.133351	0.0873445	0	0	0.0519379	0.0716993	0.0527102	0	0.0699938	0.0633401	0.059538	0.0192675	0.0650995	0.0762857	0.0652408	0	0	0.0771617	0	0	0	0	0.0138006	0.0217407	0.0164306	0.0549438	0.0369918	0.0461286	0	0.0502878	0.030124	0.0499653	0.0191826	0.086954	0.0725414	0	0
ASV283	Bacteria	Pseudomonadota	Alphaproteobacteria	0.0941982	0.0223093	0	0	0.0777077	0	0	0	0.0965847	0	0	0	0.249971	0	0	0	0.140912	0.0488329	0	0	0.100784	0	0	0	0.0631643	0.0918847	0	0	0.0793488	0.170392	0.113986	0.0724529	0.130444	0.124873	0	0	0	0.102675	0	0	0	0.094634	0	0	0	0
ASV284	Bacteria	Actinomycetota	Unclassified Actinomycetota	0.0543961	0.0475285	0.0328111	0.0406541	0.0273619	0.0516964	0.0990688	0.0257763	0.071251	0.0569773	0.0303807	0	0	0.081153	0.0635051	0	0.062097	0.0781326	0	0.0381043	0.0207497	0	0.089	0.0758204	0.0398209	0.0158813	0.0440924	0	0	0.0455698	0	0.0425517	0.0314032	0.027932	0.0595224	0.103577	0	0.0245842	0.0826954	0.0556135	0.0386828	0.0383651	0.086954	0.0656327	0	0
ASV285	Bacteria	Planctomycetota	Unclassified Planctomycetota	0	0.0426787	0	0.0436655	0	0	0	0.0565095	0	0.0884966	0.0607614	0.183865	0.0581328	0	0.0368739	0	0	0.0878992	0	0	0.037053	0	0.0995953	0.0511347	0	0	0.051966	0.0642494	0	0	0	0.0552022	0	0.0230029	0.0938623	0	0	0.0361533	0.0335252	0.0695169	0.0757539	0	0	0.029362	0.0841583	0.0507112
ASV286	Bacteria	Pseudomonadota	Alphaproteobacteria	0	0	0	0.225856	0	0	0	0.191339	0	0	0	0.135084	0	0	0	0.166916	0	0.183937	0	0.116694	0	0.0554551	0	0	0	0	0	0	0	0.215961	0	0.142606	0.0169094	0	0	0	0	0	0	0	0.0161179	0	0.0608678	0.341981	0	0
ASV287	Archaea	Methanobacteriota	Unclassified Methanobacteriota	0	0.0678979	0.110737	0	0	0.0861607	0.08646	0	0	0.130927	0.117725	0	0	0	0	0	0	0	0	0.178614	0	0	0	0.0758204	0	0	0.0913343	0	0	0	0	0	0	0	0	0	0.201599	0	0.0715204	0	0.0967071	0	0.0956494	0.297074	0	0
ASV288	Bacteria	Verrucomicrobiota	Unclassified Verrucomicrobiota	0.0278614	0.0572282	0.0683564	0.036137	0.0328343	0.0689285	0.0846588	0.0356902	0.0348338	0.064251	0.0626602	0	0.0465062	0.081153	0.0532623	0	0	0.0520884	0.0457457	0.0500119	0.0207497	0.0675105	0.0635714	0.0317388	0.0617911	0.0192844	0.0787364	0	0	0	0	0.0230009	0.0362345	0.0164306	0.0629564	0.0665853	0.0461286	0.0187997	0.0558753	0.0486618	0.0370711	0.0255768	0.0695632	0	0	0
ASV289	Bacteria	Planctomycetota	Unclassified Planctomycetota	0.0822576	0.0834174	0.0751921	0	0.0492514	0.0612698	0.111678	0.0713804	0	0.0678878	0.0626602	0	0	0	0	0	0	0	0	0.0904977	0	0	0.0699286	0	0	0.0533158	0.0645639	0	0	0	0	0.0724529	0	0	0.0721137	0	0	0.0665221	0.0525228	0	0	0	0	0	0	0
ASV290	Bacteria	Chloroflexota	Chloroflexia	0.0517427	0.0669279	0.0369125	0	0.0503459	0.0689285	0.050435	0	0.0855012	0.0424299	0.0227855	0	0	0	0	0	0.0573203	0.0992936	0.112605	0	0.0578026	0.0867993	0.0529762	0	0.0370747	0.032897	0.0236209	0	0	0.033682	0.0276329	0.0724529	0.0652221	0.0476488	0.091573	0	0	0.0535069	0.0592278	0	0	0.103586	0.0695632	0	0	0
ASV291	Bacteria	Chloroflexota	Chloroflexia	0	0.0271592	0.0984333	0.0918481	0	0.0804166	0.0396275	0.0436214	0	0.0497036	0.0522168	0.0525328	0	0	0.0614565	0.0834578	0	0.0537162	0.0422268	0.0571565	0	0	0.0466191	0.0793469	0	0	0.0992079	0.0581882	0	0	0	0	0	0	0.0331952	0	0.0820064	0	0.0603453	0.0625652	0.0773657	0.0140672	0	0.0863588	0.0862622	0
ASV292	Bacteria	Verrucomicrobiota	Unclassified Verrucomicrobiota	0.0265347	0.0290991	0	0.0828139	0	0.036379	0.036025	0.0763374	0.022167	0.0218211	0.0294313	0.0900563	0	0.0357073	0.0327768	0.0834578	0	0.027672	0.0387079	0.0738271	0.0192675	0.0241109	0.0466191	0.0740571	0	0	0.0645639	0.121225	0	0	0	0.0172507	0	0	0.0446418	0.0184959	0.0632133	0	0.0279376	0.0463446	0.067695	0.0204614	0.0347816	0.058724	0.096782	0.0434667
ASV293	Bacteria	Pseudomonadota	Deltaproteobacteria	0.06501	0.0572282	0	0	0.0908414	0.0516964	0.064845	0	0.0601675	0.0691001	0	0	0	0.0486918	0	0	0.0955338	0.0439496	0.0633401	0	0.0518741	0	0.0254286	0	0.0466866	0.0669283	0	0	0.0734711	0.0653828	0.0587199	0.0667027	0.0652221	0.0575071	0.0400632	0	0.0119593	0.0925524	0.0502878	0	0	0.0562689	0.0463755	0.0069087	0	0
ASV294	Bacteria	Chloroflexota	Chloroflexia	0.0318416	0.0261892	0	0	0.0514403	0.0746726	0.064845	0.0555181	0.0348338	0.0509159	0	0	0.0930124	0.10063	0.0368739	0	0	0	0.105567	0.102405	0.0414993	0.103677	0.0805238	0.135771	0	0.00567189	0.0629892	0.0448534	0.0176331	0.0554763	0	0.0138006	0.0579752	0.0230029	0.0400632	0	0	0.0231381	0.0447002	0	0	0.0191826	0.0782586	0.0569968	0.0557548	0.0507112
ASV295	Bacteria	Acidobacteriota	Unclassified Acidobacteriota	0.0318416	0.0261892	0.0683564	0	0.0284564	0.0344643	0	0.0733632	0.0205836	0.0509159	0.0237349	0.0844278	0.0523195	0.0843991	0.0860391	0.0922428	0.0668737	0.0195332	0.0844535	0.0690641	0	0.053044	0.0593333	0.0863999	0.0288359	0.0226876	0.092909	0	0	0	0	0.0402516	0.0410658	0.0361473	0.0412078	0	0.0478371	0.0274765	0.0391127	0.0324412	0.0757539	0.0294133	0.043477	0.0621783	0	0
ASV296	Bacteria	Pseudomonadota	Alphaproteobacteria	0.0888912	0.0223093	0	0	0.100692	0.0191468	0	0	0.026917	0	0	0	0.162772	0	0	0	0.0740387	0	0	0	0.114123	0.0144665	0	0	0.0439404	0.162216	0	0	0.197882	0.0832145	0.0898069	0.0333514	0.0579752	0.0854392	0	0	0	0.115691	0	0	0	0.0524323	0	0	0	0
ASV297	Bacteria	Pseudomonadota	Alphaproteobacteria	0.0437823	0.0475285	0.0451152	0.0105399	0.0426845	0.0459524	0.0702488	0.0178451	0.0475007	0.0460667	0.0417735	0	0.0813859	0.0486918	0.0266312	0	0.0525436	0.0553439	0.0492646	0	0.050392	0	0.0614524	0	0.0398209	0.032897	0.0299198	0.0157593	0	0.0614202	0.0466305	0.0552022	0.0507283	0.0427196	0.0869943	0	0.0427117	0.0737527	0	0.030124	0.0241768	0.0639419	0.0521724	0.029362	0.00736385	0
ASV298	Bacteria	Planctomycetota	Unclassified Planctomycetota	0	0.0611081	0.0246083	0.0316198	0.0175116	0.0382936	0.0486338	0.0456042	0.0126668	0.0545527	0.0379759	0.0375235	0	0.0421996	0.0389225	0.0614952	0	0.027672	0	0.0571565	0.0177854	0.0361664	0.0317857	0.0299755	0	0.00340314	0.0488166	0.0545514	0	0	0.0103623	0.024151	0	0	0.0217486	0.0480894	0.0153762	0	0.0312902	0.0278067	0.0322357	0.0255768	0.0347816	0.0276348	0.0515469	0.156963
ASV299	Bacteria	Acidobacteriota	Unclassified Acidobacteriota	0.0995051	0.0455886	0	0	0.0339287	0.0804166	0.0396275	0	0.134585	0	0	0	0	0	0	0	0.076427	0.126966	0.186502	0	0.0652132	0	0.0678095	0.0564245	0.11397	0.074869	0	0	0	0.0515137	0	0.0609525	0.140107	0.0673655	0	0	0	0	0.0391127	0	0	0.126605	0	0	0	0
ASV300	Bacteria	Pseudomonadota	Alphaproteobacteria	0.0358218	0	0.0410139	0.0572169	0.0197006	0	0.0990688	0.0535353	0	0	0.0493687	0.0731707	0	0	0	0	0	0	0	0	0.0578026	0.103677	0	0	0	0.0306282	0	0.0630372	0.0146942	0.0832145	0.0414493	0.0276011	0.0555596	0.0476488	0.0389185	0	0.119593	0.0260304	0.0279376	0	0.0564125	0	0	0.0483609	0.046287	0.101422
ASV301	Bacteria	Unclassified Bacteria	Unclassified Bacteria	0.0145941	0.0426787	0.105269	0.0933538	0	0.0459524	0.064845	0.0723718	0	0.0242457	0.0930409	0	0	0.025969	0.0839906	0.0834578	0	0.0390663	0.0633401	0.0666825	0	0.0433996	0.0805238	0.0581877	0	0	0.0535408	0.0278818	0	0	0	0	0	0	0.0366292	0.0850812	0.0956742	0	0.0502878	0.0695169	0.0789775	0	0.0492739	0.0811772	0	0
ASV302	Bacteria	Pseudomonadota	Deltaproteobacteria	0	0.0611081	0.0683564	0.0165628	0	0.103393	0.0828575	0.04263	0	0.081223	0.0560144	0	0	0.0843991	0.0860391	0.0527102	0	0.102549	0.123161	0.100024	0	0.113321	0.0593333	0.0581877	0	0	0.0551155	0	0	0	0	0	0	0	0.0618118	0.0591869	0.0546709	0	0.0648153	0.0579307	0.04513	0	0.0956494	0.0362707	0	0
ASV303	Bacteria	Pseudomonadota	Unclassified Pseudomonadota	0.0809308	0.0921471	0.0615208	0	0.0601961	0	0.106274	0.0416386	0	0	0	0	0.186025	0	0	0	0.128971	0	0	0	0	0	0.0339048	0	0.0617911	0.0850784	0.0645639	0	0.0646545	0.156522	0.0846257	0.050602	0	0.149519	0	0	0	0	0	0	0	0.0895186	0	0	0	0
ASV304	Bacteria	Bacillota	Bacilli	0.120733	0.787615	0	0	0	0	0	0	0	0	0	0	0	0	0	0	0.0429902	0	0	0	0	0	0	0	0	0	0	0	0.0960022	0	0	0	0	0	0	0	0	0	0	0	0	0	0	0	0	0
ASV305	Bacteria	Pseudomonadota	Unclassified Pseudomonadota	0.0384753	0.114456	0.0478495	0	0.0492514	0.0746726	0.0540375	0	0.0475007	0.0606141	0	0	0.0988257	0	0	0	0	0.0716216	0.0879724	0	0.0592847	0.0675105	0	0	0.0576717	0.0589877	0.0488166	0	0.00881653	0.0257569	0.02936	0.0529021	0.0845472	0.0575071	0.0595224	0	0	0.0404917	0.0614628	0	0	0.0524323	0.086954	0	0	0
ASV306	Bacteria	Unclassified Bacteria	Unclassified Bacteria	0.0543961	0.0271592	0.0218741	0.0346313	0.043779	0.0516964	0.04323	0.0525439	0.022167	0.0303071	0.0360771	0	0.0813859	0.0357073	0.0471167	0.0834578	0.0406019	0.0325553	0.066859	0	0.0385351	0.0482218	0	0	0.030209	0.0351657	0.0393682	0	0.0274292	0	0.0552658	0.024151	0.0700534	0.0443627	0.0469312	0	0.0597964	0.0187997	0.0335252	0.0417101	0.0306239	0.0345286	0.0840555	0.0345435	0.0231435	0.0313926
ASV307	Bacteria	Chloroflexota	Chloroflexia	0	0.0417087	0.0642551	0.0587226	0	0	0.0414288	0.0396558	0	0.0363685	0.0816482	0.0694184	0	0	0.0573594	0.101028	0	0.0553439	0.140756	0	0	0.139843	0.122905	0.105796	0	0	0.0645639	0	0	0	0	0	0	0	0.0560885	0.147967	0.126427	0	0.0301727	0.0880547	0.0628596	0	0	0.0725414	0	0
ASV308	Bacteria	Acidobacteriota	Unclassified Acidobacteriota	0.0742972	0	0	0	0.0777077	0	0	0	0.0522507	0	0	0	0	0	0	0	0.0835921	0	0	0	0.075588	0	0	0	0.0823882	0.122513	0	0	0.20376	0.140672	0.127802	0.0621025	0.0773003	0.0722947	0	0	0	0.0809834	0	0	0	0.0639419	0	0	0	0
ASV309	Bacteria	Pseudomonadota	Alphaproteobacteria	0.0238812	0.0349189	0.0300768	0.036137	0.00985028	0.0631845	0.0522363	0.0416386	0.0237503	0.0448545	0.0607614	0.0300188	0	0.0616763	0.0798935	0.0307476	0	0.0585995	0.0879724	0.0666825	0.0222318	0.0602773	0.0339048	0.0828734	0.0137314	0.0147469	0.0740123	0.0339431	0	0	0	0.0138006	0.0289876	0.0312182	0.0526545	0.0443902	0.0392947	0	0.0346427	0.0671996	0.0402946	0.0358075	0.0666647	0.0552696	0.0115718	0
ASV310	Bacteria	Actinomycetota	Acidimicrobiia	0.0517427	0.0135796	0	0	0.0295508	0	0	0	0.0364172	0	0	0	0	0	0	0	0.0597086	0.0602272	0	0	0.0918913	0	0.00211905	0	0.0645374	0.104363	0	0	0.185147	0.174354	0.167524	0.0586524	0.0797159	0.0870823	0.0194593	0	0	0.0607375	0.0424652	0	0	0.0319709	0	0	0	0
ASV311	Bacteria	Pseudomonadota	Alphaproteobacteria	0	0	0.0273426	0.0888367	0	0	0	0.0733632	0	0	0.0455711	0.105066	0	0	0.0430196	0.0878503	0	0	0	0.0881162	0	0	0	0.0687673	0	0	0.0661386	0.151532	0	0	0	0	0	0	0	0.0776828	0.0478371	0	0	0.0625652	0.0693068	0	0	0.0552696	0.103094	0.079689
ASV312	Unknown	Unknown	Unknown	0.0464357	0.0504384	0	0	0.0601961	0.042123	0.04323	0	0.0633342	0.0218211	0	0	0.0406929	0.0746608	0	0	0.0525436	0.0472051	0.0281512	0	0.0592847	0.0433996	0.0487381	0	0.0480598	0.0816753	0	0	0.0734711	0.0614202	0.0656281	0.0575023	0.0628065	0.0739378	0.0652458	0	0	0.0694143	0.0301727	0	0	0.0728938	0.0550709	0	0	0
ASV313	Archaea	Methanobacteriota	Unclassified Methanobacteriota	0.0172476	0.0465585	0.0779263	0	0.022984	0.0976488	0.050435	0	0.022167	0.055765	0.0360771	0	0	0.120106	0.0962819	0.439252	0	0.0585995	0.161869	0	0.0177854	0.0747438	0.0699286	0.0440816	0	0	0.0614144	0	0	0	0	0.0322013	0	0.0328612	0.0446418	0	0.0529625	0.0202458	0.0536403	0.10891	0	0.0268556	0.0724617	0	0	0
ASV314	Bacteria	Chloroflexota	Chloroflexia	0.0517427	0.0669279	0.0437481	0.0391484	0	0.0612698	0.0540375	0.0465956	0.026917	0.0303071	0	0.0844278	0	0	0	0	0.0406019	0	0	0	0.0607668	0.0771549	0.0317857	0.0229224	0.0549254	0.0487783	0.0299198	0.0315186	0.00881653	0.0752893	0.0449035	0.0414017	0.0845472	0.0476488	0.0492205	0	0.051254	0.0607375	0	0.0486618	0.0274004	0	0.0956494	0	0.0168317	0
ASV315	Bacteria	Bacteroidota	Flavobacteriia	0	0	0	0.0225856	0	0	0	0.0475869	0	0	0.00379759	0.054409	0	0	0	0.171308	0	0.410196	0	0.00952608	0	0.867993	0	0	0	0	0	0	0	0.380409	0	0.0425517	0.0193251	0	0	0	0	0	0	0	0	0	0	0	0	0
ASV316	Bacteria	Unclassified Bacteria	Unclassified Bacteria	0.0968517	0.0562582	0	0	0.0853691	0.0765873	0.113479	0	0.0760011	0.0278825	0	0	0	0	0	0	0.069262	0.0325553	0.0809346	0	0.0666953	0.0626884	0.0572143	0	0.0741493	0.032897	0	0	0.0195923	0	0.0431764	0.0517521	0.0676378	0.0837961	0.0412078	0	0	0.0592914	0.0368777	0	0	0.0664996	0.0608678	0	0	0
ASV317	Bacteria	Actinomycetota	Unclassified Actinomycetota	0.0331684	0.0271592	0.0396467	0.0782967	0.0262674	0.036379	0.0378263	0.0188365	0	0.0521282	0.0237349	0.103189	0	0.0454457	0.0839906	0.272336	0	0.0358108	0.154831	0.0833532	0	0.0843882	0.042381	0.0828734	0.0123582	0	0.0551155	0	0	0	0	0	0	0	0.0217486	0.199756	0.0119593	0	0.0312902	0.104275	0.09026	0.00639419	0	0.107085	0	0
ASV318	Bacteria	Chloroflexota	Chloroflexia	0	0.0261892	0.0806606	0.0632397	0	0	0	0	0	0	0.0617108	0.0619137	0	0	0.0368739	0.171308	0.0549319	0.0830159	0	0	0	0	0.0720476	0	0.0411941	0.0431064	0.058265	0.0448534	0	0	0.0345411	0.0322013	0	0	0.0457865	0.110975	0.0837149	0	0	0.10891	0.0918718	0.0422016	0	0.0483609	0.047339	0
ASV319	Archaea	Unclassified Archaea	Unclassified Archaea	0.0278614	0.0931171	0.0615208	0.0316198	0.0470624	0.0612698	0.0828575	0.0317246	0.0475007	0.0460667	0.0398747	0	0	0.0681685	0.0471167	0	0	0.0390663	0.0598212	0.0357228	0.0340887	0	0.0614524	0	0.030209	0	0.0362188	0	0	0	0	0	0	0.0328612	0.0686797	0	0	0.0318149	0.0581103	0.0556135	0.0354593	0.0485958	0.0405785	0.0207261	0	0
ASV320	Bacteria	Pseudomonadota	Alphaproteobacteria	0	0	0.0287097	0.025597	0	0	0	0.0525439	0	0	0	0.129456	0	0	0.0368739	0	0	0	0	0	0	0	0	0	0	0	0	0.166079	0	0	0	0	0	0	0	0	0	0	0	0	0.0467418	0	0	0	0.163057	0.280119
ASV321	Bacteria	Planctomycetota	Unclassified Planctomycetota	0	0	0.0656222	0.0782967	0	0	0	0.0277591	0	0	0.0313301	0.118199	0	0	0	0	0	0	0	0	0	0	0	0.107559	0	0	0.075587	0.0933435	0	0	0	0	0	0	0	0	0.0529625	0	0	0	0	0	0	0	0.0652227	0.239067
ASV322	Bacteria	Actinomycetota	Unclassified Actinomycetota	0.0291882	0.0349189	0.0492166	0.0376427	0	0.0344643	0.0414288	0.0456042	0	0.0545527	0.0636096	0.0393996	0	0	0.0614565	0.0790653	0	0	0.0879724	0.064301	0	0.101266	0.0445	0.0775836	0	0	0.0818859	0	0.00881653	0	0	0.0322013	0	0	0.0457865	0.173862	0.0751726	0	0.0435827	0.115861	0.0870364	0	0	0.0552696	0	0
ASV323	Bacteria	Chloroflexota	Chloroflexia	0.0504159	0.0475285	0	0	0.043779	0.0823313	0.0522363	0	0.0506674	0.0787984	0.0313301	0	0.0813859	0.0843991	0	0	0.0334368	0.0797604	0.0950102	0	0.0429814	0	0.0995953	0	0.0494329	0.0272251	0	0	0	0.0356633	0	0.0563523	0.0869628	0.0427196	0.077837	0	0	0.0390456	0.0670503	0	0	0.047317	0.0695632	0	0	0
ASV324	Bacteria	Pseudomonadota	Unclassified Pseudomonadota	0.0543961	0.0824474	0.0191398	0	0.0448735	0.0516964	0.0594413	0.0148709	0.0411672	0.0303071	0.0417735	0	0	0.0454457	0.0573594	0.0307476	0.0453786	0.0504607	0.0950102	0	0	0.0964436	0.0593333	0.033502	0.0727762	0.0340314	0	0	0	0	0.0241788	0.0575023	0.0628065	0.0575071	0.0595224	0	0	0.0303688	0.0469352	0	0	0.0294133	0.0840555	0	0	0
ASV325	Archaea	Methanobacteriota	Unclassified Methanobacteriota	0	0.0504384	0.102535	0.0526997	0	0	0	0.0406472	0	0.0981949	0.0664578	0	0	0	0.122913	0	0	0	0	0	0	0.0819771	0.163167	0.111086	0	0	0.107082	0	0	0	0	0	0	0	0.081271	0	0.0922572	0	0.0681678	0.127448	0.0596361	0	0	0	0	0
ASV326	Bacteria	Acidobacteriota	Unclassified Acidobacteriota	0.0212278	0.0368589	0.0560523	0.0436655	0.0251729	0.0344643	0.0378263	0.0297418	0	0.0339439	0.0493687	0.0412758	0	0.0194767	0.0860391	0.0483177	0.0238834	0.0374386	0.0527834	0.0571565	0.0163033	0.0602773	0.0741667	0.0775836	0.0233433	0	0.0251957	0.0242451	0.012735	0.00990648	0.0207247	0.025301	0	0.027932	0.0389185	0.0776828	0.0563794	0.033261	0.0346427	0.081103	0.0483536	0.0230191	0.0231877	0.0241805	0	0
ASV327	Bacteria	Chloroflexota	Chloroflexia	0	0	0.053318	0.0632397	0	0	0	0.0505611	0	0	0.0541156	0.0956848	0	0	0.0737478	0	0	0	0	0.0857347	0	0	0	0.0458449	0	0	0.0598397	0.0897068	0	0	0	0	0	0	0	0.177561	0	0	0	0.0834202	0.0612478	0	0	0.0569968	0.119926	0.053126
ASV328	Bacteria	Unclassified Bacteria	Unclassified Bacteria	0	0.0698378	0.0328111	0.0210799	0.0262674	0.11871	0.12969	0.0228021	0	0.0533404	0.0370265	0	0	0.103876	0.0716993	0	0.0310485	0.0878992	0.0738968	0	0	0.0867993	0.120786	0.0317388	0	0	0	0.0315186	0	0	0	0	0	0	0.101875	0.0887804	0	0.0274765	0.0480527	0	0.0354593	0	0.0898525	0	0.0241955	0
ASV329	Bacteria	Chloroflexota	Chloroflexia	0.0225545	0.0164895	0.0628879	0.0451712	0	0.0191468	0.04323	0.0475869	0	0.0218211	0.0246843	0.0300188	0	0	0.0471167	0.153738	0	0.034183	0	0.0762086	0	0.0385775	0.0381429	0.0811102	0	0	0.0740123	0.08607	0	0	0	0	0	0	0.0309059	0	0.0751726	0	0.0335252	0.0787858	0.0596361	0	0	0.0276348	0.124133	0
ASV330	Bacteria	Actinomycetota	Unclassified Actinomycetota	0.0716437	0.032979	0.0341782	0	0.0481569	0.0689285	0.10087	0	0.0459173	0.0533404	0.0370265	0	0.180212	0.0584302	0.0286797	0	0.0477669	0.0423218	0.0774157	0	0.025196	0	0.0784048	0	0.0398209	0.0226876	0	0	0	0	0	0.0448518	0.0507283	0.0295751	0.0434972	0	0.0358778	0.033261	0.0692854	0.0440273	0	0.0588265	0.0608678	0.0224533	0	0
ASV331	Bacteria	Chloroflexota	Chloroflexia	0.0517427	0.0572282	0	0	0.0470624	0	0	0	0.0585842	0	0	0	0.116266	0.081153	0	0	0.0883688	0.0976658	0	0	0.0578026	0	0.0932381	0	0.0549254	0.0623908	0	0	0.0333069	0.0554763	0.0552658	0.0793532	0.0652221	0.08051	0.0480758	0	0	0.0708604	0	0	0	0.101028	0	0	0	0
ASV332	Bacteria	Pseudomonadota	Alphaproteobacteria	0.0490892	0.0242492	0	0	0.0612906	0.047867	0.0234163	0.0208193	0.0427506	0.0254579	0.00759518	0	0	0	0	0	0.10031	0.0423218	0	0	0.0459457	0.0723327	0.0190714	0	0.0398209	0.0635252	0	0	0.0587769	0.0574576	0.0708093	0.0471519	0.0917941	0.0607933	0.0400632	0	0	0.0621837	0.0234676	0	0	0.0409228	0	0	0	0
ASV333	Bacteria	Pseudomonadota	Gammaproteobacteria	0	0.0339489	0.0724578	0.0828139	0	0.0344643	0	0.0634493	0	0	0.0816482	0.0750469	0	0	0.0983304	0.101028	0	0	0	0.0952608	0	0.0650995	0	0.0846367	0	0	0.0992079	0.0594004	0	0	0	0	0	0	0.0331952	0	0.0939657	0	0	0	0.0967071	0	0	0.069087	0.0525989	0
ASV334	Bacteria	Pseudomonadota	Deltaproteobacteria	0.0809308	0.0281291	0	0	0.0744243	0	0	0	0.0807511	0	0	0	0.145332	0	0	0	0.145689	0	0	0	0.0592847	0	0	0	0.0768956	0.0669283	0	0	0.0891449	0.0594389	0.0518117	0.0701528	0.106288	0.0755808	0	0	0	0.0853218	0.0379952	0	0	0.0485958	0	0	0	0
ASV335	Bacteria	Chloroflexota	Chloroflexia	0	0.0232793	0.0587865	0.0677568	0	0.0650992	0.0180125	0.0257763	0	0.0339439	0.0655084	0.0168856	0	0.0681685	0.0757964	0	0	0.0455774	0.0492646	0.0476304	0	0.0602773	0.0826429	0.0863999	0	0	0.0960585	0.0266696	0	0	0	0	0	0	0.0320505	0.0591869	0.0580879	0	0.0424652	0.10891	0.0483536	0	0.0637663	0.0552696	0.0168317	0
ASV336	Bacteria	Nitrospinota	Nitrospinia	0	0.0659579	0.0697236	0	0	0.0650992	0.093665	0.0317246	0	0.072737	0.0541156	0	0	0	0.0655536	0.0614952	0	0.0911547	0.105567	0.133365	0	0	0.105952	0	0	0	0	0	0	0	0	0	0	0	0.0766924	0	0.0649218	0	0.0704029	0.0834202	0.0386828	0	0	0.0794501	0	0
ASV337	Bacteria	Pseudomonadota	Gammaproteobacteria	0	0.0436486	0.0123042	0.0120457	0.0186061	0.0382936	0.0252175	0.0158623	0.022167	0.0181842	0.0284819	0.0262664	0	0.081153	0.040971	0	0.0310485	0.0439496	0.0457457	0.0333413	0	0.0554551	0.042381	0.0352653	0.0343284	0.0397032	0	0.0424289	0.0323273	0.0237756	0.0552658	0.0299012	0.0555596	0.0443627	0.0400632	0.0480894	0.025627	0.0491685	0.0379952	0.0393929	0.0193414	0.0255768	0.0231877	0.0207261	0.0147277	0.0144889
ASV338	Bacteria	Actinomycetota	Actinomycetes	0.0212278	0.0475285	0	0	0.0372122	0.08999	0.0612425	0	0	0	0.0341783	0	0.0174398	0	0.0430196	0	0.0238834	0.0667383	0.0246323	0	0.0311245	0	0.0847619	0.0352653	0.0549254	0	0.0614144	0.0824332	0.0284088	0.0237756	0	0.0276011	0	0	0.0652458	0	0.0239185	0.0375994	0.0793429	0	0	0	0	0.058724	0.0368192	0
ASV339	Unknown	Unknown	Unknown	0.0437823	0.0407387	0.0396467	0.0692625	0	0.0344643	0.0594413	0.0485783	0	0.0327316	0.0474699	0.0844278	0.0523195	0.0486918	0.0327768	0.0351401	0	0.0325553	0.0387079	0.0523934	0	0.0337553	0.0339048	0.0370285	0	0	0.0314946	0.0618249	0	0	0	0.025301	0.0169094	0	0.0343399	0.0184959	0.0358778	0.0187997	0.0257026	0.050979	0.0548007	0.0383651	0.0289847	0.0414522	0.0241955	0
ASV340	Bacteria	Pseudomonadota	Gammaproteobacteria	0.00398021	0	0.0136713	0	0	0	0	0	0.577925	0	0	0	0	0	0	0	0	0	0	0	0	0	0.0190714	0	0.25403	0	0	0	0	0	0	0	0	0.0180737	0.0206039	0	0	0	0	0	0	0.0255768	0	0	0.0305074	0.026563
ASV341	Bacteria	Chloroflexota	Chloroflexia	0	0.0426787	0.0792935	0.0677568	0	0.11871	0.0612425	0.0743546	0	0.0412176	0.0674072	0	0	0	0.0778449	0	0	0.0504607	0	0.138128	0	0	0	0	0	0	0.0834606	0.0484901	0	0	0	0	0	0	0.0515098	0	0	0	0.0245851	0.0695169	0.0693068	0.0242979	0.0811571	0	0.0262995	0
ASV342	Bacteria	Planctomycetota	Planctomycetia	0.0530694	0.0562582	0.0287097	0	0.0284564	0.0650992	0.02882	0	0.044334	0.0509159	0.0275325	0	0	0.0194767	0	0.0483177	0.0477669	0.0439496	0	0.0833532	0.0355708	0.0433996	0.0275476	0.0458449	0.0384478	0.0351657	0	0	0.0480011	0.0356633	0.0276329	0.0437018	0.026572	0.0460057	0.0606671	0.0221951	0	0.0404917	0.0245851	0.0347584	0.0209532	0.0306921	0	0	0	0
ASV343	Bacteria	Unclassified Bacteria	Unclassified Bacteria	0.0689902	0.0378288	0.0136713	0	0.0525348	0.0440377	0.04323	0	0	0.0266702	0	0	0.0871992	0.0421996	0	0	0.076427	0.0406941	0	0.0142891	0	0.0626884	0.0466191	0	0.0576717	0.0589877	0	0	0.0911041	0.073308	0	0.0368015	0.0700534	0.0640794	0.0377739	0	0	0.0665221	0.0424652	0	0	0.0537112	0.0347816	0	0	0
ASV344	Bacteria	Acidobacteriota	Unclassified Acidobacteriota	0	0.0242492	0.0615208	0.0451712	0	0.0325496	0.0486338	0.0565095	0	0.0424299	0.0778506	0	0	0	0.0696507	0	0	0	0	0.0857347	0	0.127788	0.0466191	0.0299755	0	0	0.0818859	0	0	0	0	0	0	0	0.0560885	0.18126	0.0990911	0	0.0346427	0.081103	0.04513	0	0.0724617	0.069087	0	0
ASV345	Bacteria	Unclassified Bacteria	Unclassified Bacteria	0	0.031039	0.0437481	0.0903424	0	0.0631845	0.0558388	0.0604751	0	0.0290948	0.0560144	0.0694184	0	0.0292151	0.040971	0.0878503	0	0	0.0563023	0.059538	0	0	0	0.0440816	0	0	0.0472419	0.0800087	0	0	0	0	0	0	0.0343399	0.0221951	0.0632133	0	0.0245851	0.050979	0.067695	0	0	0.0310892	0.0820543	0
ASV346	Bacteria	Nitrospirota	Nitrospiria	0	0	0.0546852	0.0843196	0	0	0	0.070389	0	0	0	0.114447	0	0	0	0.14056	0	0	0	0	0	0	0	0	0	0	0	0.071523	0	0	0	0	0	0	0	0	0.0632133	0	0	0	0	0	0	0	0.119926	0.212504
ASV347	Bacteria	Pseudomonadota	Alphaproteobacteria	0	0	0.0464824	0	0	0	0	0.0525439	0	0	0.0417735	0.106942	0	0	0.0471167	0.0834578	0	0.0374386	0	0	0	0	0	0.059951	0	0	0.0661386	0.109103	0	0	0	0	0	0	0.0366292	0	0.0922572	0	0	0	0.04513	0	0	0	0.0810023	0.149719
ASV348	Bacteria	Planctomycetota	Planctomycetia	0.0742972	0.0552883	0	0	0.0503459	0.0382936	0.05764	0	0.0601675	0.0630387	0	0	0.116266	0	0	0	0.150466	0	0	0	0.0414993	0	0	0	0	0.0442408	0	0.0351554	0.0568176	0	0.0811716	0.0276011	0.0748847	0.0722947	0	0	0	0.0621837	0.0424652	0	0	0.0792879	0	0	0	0
ASV349	Bacteria	Pseudomonadota	Gammaproteobacteria	0.0875645	0	0	0	0	0	0	0	0.0554175	0	0	0	0	0	0	0	0.112252	0	0	0	0.0533563	0	0	0	0.0521792	0.120244	0	0	0.171432	0.101046	0.112259	0.0425517	0.072469	0.08051	0	0	0	0.0795372	0	0	0	0.0383651	0	0	0	0
ASV350	Bacteria	Planctomycetota	Unclassified Planctomycetota	0.0490892	0.0426787	0.0232412	0.0225856	0.0426845	0.0210615	0.0468325	0	0.0633342	0.0375808	0.0398747	0	0	0.0584302	0.0471167	0	0.069262	0.0504607	0.109086	0	0.0296424	0.0385775	0.0211905	0	0.0288359	0.0374345	0	0	0.0401642	0.0297194	0	0.0368015	0	0.0410765	0.0366292	0	0	0.0506146	0.0301727	0.0417101	0.0290121	0.0268556	0.0579693	0	0	0
ASV351	Bacteria	Chloroflexota	Chloroflexia	0.0398021	0.0659579	0.0697236	0.0481826	0.064574	0.0861607	0.05764	0	0	0	0	0	0.133705	0	0	0.101028	0.0644853	0.0569717	0.0844535	0	0.0948556	0.0385775	0	0	0.0274627	0.0589877	0	0	0	0.0515137	0	0.0632526	0	0	0.0503651	0	0.0717556	0.0679682	0	0	0	0	0	0	0	0
ASV352	Bacteria	Pseudomonadota	Unclassified Pseudomonadota	0.0371486	0.0581982	0.0492166	0	0.0470624	0	0.0450313	0	0.0839179	0.0509159	0	0	0	0.21749	0	0	0	0.0553439	0	0	0	0	0.0593333	0.0493714	0.0439404	0	0.0440924	0.0157593	0.0783691	0	0	0.0437018	0.101457	0	0.0423525	0	0	0	0.0670503	0	0	0.0511535	0	0	0	0
ASV353	Bacteria	Unclassified Bacteria	Unclassified Bacteria	0	0.00678979	0.0150384	0.0436655	0	0	0	0.0257763	0	0.00969826	0.0180385	0.0919325	0	0	0.0327768	0.0439252	0	0.0146499	0	0.0142891	0	0	0	0.0211592	0	0	0.017322	0.158805	0	0	0	0	0	0	0	0	0.0597964	0	0	0.0440273	0.0725303	0	0	0	0.136757	0.154548
ASV354	Archaea	Methanobacteriota	Unclassified Methanobacteriota	0.0424555	0.0436486	0	0	0.0634796	0	0	0	0.0760011	0.0436422	0	0	0.0697593	0	0	0	0.0477669	0	0	0	0.0607668	0.0723327	0	0	0.0549254	0.106632	0	0	0.0352661	0.0693454	0.0690822	0.0598024	0.0748847	0.0591502	0.0183146	0	0	0.0911063	0	0	0	0.0511535	0	0	0	0
ASV355	Bacteria	Chloroflexota	Chloroflexia	0	0	0	0	0	0.124454	0	0	0	0.0945581	0.0436723	0	0	0	0	0	0	0.096038	0.292068	0	0	0	0.161048	0	0.0645374	0	0	0.00363676	0	0	0	0	0	0	0.106454	0	0	0	0.0569928	0	0	0.150903	0.24637	0	0.00105198	0
ASV356	Bacteria	Pseudomonadota	Unclassified Pseudomonadota	0.0490892	0	0	0	0.0809912	0	0	0	0.0475007	0	0	0	0	0	0	0	0.128971	0.0195332	0	0	0.0326066	0	0	0	0.0343284	0.0816753	0	0	0.117554	0.124822	0.107077	0.0678527	0.0603908	0.0903684	0	0	0	0.0939986	0	0	0	0.0319709	0	0	0	0
ASV357	Bacteria	Chloroflexota	Chloroflexia	0.0530694	0.0387988	0	0	0.045968	0.0555258	0.0414288	0	0.0538341	0.047279	0	0	0	0.0584302	0	0	0.0525436	0.0537162	0.0914913	0	0.0459457	0.0675105	0	0	0.0425672	0.0465095	0	0	0.0323273	0.0217943	0.0224517	0.048302	0.0483127	0.0657225	0.0469312	0	0	0.0535069	0.0458177	0	0	0.0447593	0	0	0	0
ASV358	Bacteria	Pseudomonadota	Gammaproteobacteria	0	0.0300691	0.101168	0.0647454	0	0.042123	0.0774538	0.0297418	0	0	0.0484193	0.0318949	0	0	0.0430196	0.0746728	0	0	0	0	0	0	0	0.0511347	0	0	0.0551155	0.0690984	0	0	0	0	0	0	0	0	0.0615048	0	0	0.0695169	0.0419064	0	0	0.0535424	0.0525989	0.0627853
ASV359	Bacteria	Unclassified Bacteria	Unclassified Bacteria	0.110119	0.0213393	0	0	0.0941249	0	0	0	0.0538341	0.0145474	0	0	0	0	0	0	0.0668737	0	0	0	0.0311245	0	0	0	0.0645374	0.0850784	0	0	0.0509399	0.0495324	0.062174	0.0908537	0.0748847	0.0460057	0	0	0	0.0983369	0	0	0	0.0767303	0	0	0	0
ASV360	Bacteria	Planctomycetota	Unclassified Planctomycetota	0.0344951	0	0	0	0	0	0	0.0713804	0	0	0	0.140713	0	0	0	0.202056	0	0	0	0	0	0	0	0	0	0	0.102357	0.0678862	0	0	0	0	0	0	0	0.207154	0	0	0	0	0	0	0.142025	0	0.0652227	0.154548
ASV361	Bacteria	Pseudomonadota	Deltaproteobacteria	0.0371486	0.0281291	0.0287097	0.00903424	0.0131337	0.0344643	0.0594413	0.0228021	0.0205836	0.0242457	0.0284819	0.043152	0	0.0292151	0.0163884	0.0219626	0.0382135	0.0374386	0.0281512	0	0.025196	0.0361664	0.0211905	0	0.0219702	0	0.0330693	0.0424289	0	0.0138691	0	0.0207008	0	0.0312182	0.0160253	0.0554877	0.0375863	0.0245842	0.0290551	0.0370757	0.00967071	0.0294133	0	0	0.0525989	0.0603704
ASV362	Bacteria	Unclassified Bacteria	Unclassified Bacteria	0	0	0.0656222	0.0948595	0	0	0	0.0931911	0	0	0.0541156	0.140713	0	0	0	0	0	0	0	0	0	0	0	0	0	0	0	0.179414	0	0	0	0	0	0	0	0	0	0	0	0	0	0	0	0.0552696	0.094678	0.0869334
ASV363	Bacteria	Bacteroidota	Flavobacteriia	0.00530694	0	0	0.35083	0	0	0	0.00495697	0	0	0	0	0	0	0	0.0702802	0	0.0585995	0	0	0	0.0433996	0	0	0	0	0	0	0	0.90149	0	0.00460019	0	0	0	0	0	0	0	0	0	0	0	0	0	0
ASV364	Bacteria	Planctomycetota	Unclassified Planctomycetota	0.0159208	0.0223093	0.0300768	0.0481826	0.0197006	0.0497817	0	0.0456042	0.0285004	0.0303071	0.0370265	0.0356473	0.0406929	0	0.0512138	0.0790653	0.0238834	0.0260442	0.0316701	0.0285782	0.0355708	0.0241109	0.0233095	0.0458449	0.0151045	0.0181501	0.0314946	0.0109103	0.0244904	0.0138691	0.0241788	0.0149506	0.0289876	0.0164306	0.0137359	0.0295935	0.0461286	0.0202458	0.0189976	0.0208551	0.0402946	0.0230191	0.0318831	0.0379979	0.0178836	0
ASV365	Bacteria	Chloroflexota	Chloroflexia	0	0.032009	0.0519509	0	0	0.0708432	0.0594413	0.0456042	0	0.0521282	0.0341783	0	0	0.133091	0.0614565	0.0746728	0	0.0537162	0.0774157	0.0452489	0	0.0650995	0	0.0758204	0.0425672	0	0.058265	0	0	0	0	0.0207008	0	0	0.0423525	0	0.0324609	0	0.0301727	0.0579307	0.0386828	0	0.0637663	0.0483609	0	0
ASV366	Bacteria	Pseudomonadota	Alphaproteobacteria	0	0.0281291	0.0437481	0.0391484	0.0383066	0.0153175	0.0396275	0.0366816	0	0.0509159	0.0379759	0.0600375	0	0	0.100379	0	0	0	0	0.0333413	0	0	0	0.0546612	0	0	0.0409429	0.0448534	0.0362457	0	0	0	0	0	0.0549438	0	0.0341693	0	0.0178801	0.0393929	0.0596361	0.0166249	0	0.0241805	0.0305074	0
ASV367	Bacteria	Bacteroidota	Flavobacteriia	0	0	0	0	0	0	0	0	0	0	0	0	0	0	0	0	0	0	0	0	0	0	0	0	0	0	0	0	0	0	0	0	0	0	0	0	0	0	0	0	0	0	0	1.31438	0	0
ASV368	Bacteria	Chloroflexota	Chloroflexia	0.0278614	0	0.0833949	0	0	0	0	0	0	0.0545527	0.0816482	0	0	0.0876453	0.0798935	0	0	0.0585995	0	0.119076	0.037053	0.0675105	0	0	0	0	0.0488166	0.0218206	0	0	0	0	0	0.0361473	0.0652458	0	0.0427117	0	0.0346427	0.0556135	0.0644714	0.0332498	0.0724617	0.0742685	0	0
ASV369	Bacteria	Acidobacteriota	Unclassified Acidobacteriota	0	0	0.0546852	0.0843196	0	0	0	0.0684062	0	0	0.0332289	0.0694184	0	0	0.0348254	0	0	0	0	0.0357228	0	0.0120555	0	0.0493714	0	0	0.0362188	0.090919	0	0	0	0	0	0	0	0	0.0290439	0	0.00894005	0.0254895	0.0322357	0	0	0.0379979	0.0820543	0.111082
ASV370	Bacteria	Pseudomonadota	Alphaproteobacteria	0.0490892	0.0397688	0	0	0.0295508	0.047867	0.07205	0	0.0728344	0	0	0	0	0	0	0	0.0453786	0.0667383	0	0	0.0414993	0	0.0593333	0	0.050806	0.0499127	0	0	0	0.0356633	0.10535	0.0644026	0.0555596	0.0492918	0.0354845	0	0	0.0592914	0.0357602	0	0	0.0703361	0	0	0	0
ASV371	Bacteria	Chloroflexota	Chloroflexia	0	0	0	0.0526997	0	0	0	0.0307332	0	0	0.0427229	0.108818	0	0	0	0.0746728	0	0	0	0	0	0	0	0.0581877	0	0	0.051966	0.12365	0	0	0	0	0	0	0	0.0961787	0	0	0	0	0.0499653	0	0	0.0276348	0.114666	0.103837
ASV372	Bacteria	Pseudomonadota	Gammaproteobacteria	0	0	0.0259754	0.0225856	0	0	0	0.0138795	0	0	0.014241	0.0356473	0	0	0.0081942	0	0	0	0	0.0142891	0	0	0	0.0282122	0	0	0.0314946	0.0703107	0	0	0	0	0	0	0	0	0.0239185	0	0	0.0139034	0.0145061	0	0	0	0.113614	0.321171
ASV373	Bacteria	Pseudomonadota	Alphaproteobacteria	0.0543961	0.0271592	0	0	0.0383066	0	0.0594413	0.0307332	0.044334	0.0206088	0.0332289	0	0	0	0	0	0	0.0585995	0	0	0.0311245	0	0.0317857	0	0.0384478	0.0555845	0	0	0.0548584	0.0376446	0.0639011	0.050602	0	0.0673655	0.0457865	0	0	0.0506146	0.0212326	0	0	0.0626631	0	0	0	0
ASV374	Bacteria	Planctomycetota	Unclassified Planctomycetota	0.0477625	0.0504384	0.0287097	0.0587226	0	0	0.04323	0.0436214	0	0	0.0256337	0	0	0	0	0	0	0	0	0	0.0444635	0	0	0	0.0439404	0	0.0409429	0.0533392	0.0754303	0	0.0449035	0.0322013	0	0	0	0	0	0.0419378	0	0	0.0402946	0	0	0	0.0757424	0.0965927
ASV375	Bacteria	Chloroflexota	Chloroflexia	0.0358218	0.0339489	0	0	0.0372122	0.0306349	0	0	0.026917	0.0230334	0.0322795	0	0	0.0519379	0	0.0527102	0.0501552	0.0390663	0.0387079	0	0.0607668	0.0241109	0.0762857	0	0.0384478	0.0782721	0	0	0.0284088	0.0634015	0.0587199	0.0402516	0.0507283	0.052578	0.0297612	0	0	0.0448301	0.0435827	0	0	0.0230191	0	0	0	0
ASV376	Bacteria	Bacteroidota	Flavobacteriia	0	0	0.0218741	0.0346313	0	0	0	0.0257763	0	0	0.0332289	0.0806754	0	0	0.0204855	0.0219626	0	0	0	0.00952608	0	0	0	0.0282122	0	0	0.0314946	0.08607	0	0	0	0	0	0	0	0	0.025627	0	0	0.0671996	0.0274004	0	0	0.0224533	0.0999379	0.154548
ASV377	Bacteria	Acidobacteriota	Unclassified Acidobacteriota	0.0398021	0.0378288	0.00546852	0	0.0339287	0.0650992	0.0396275	0	0.0364172	0.0787984	0	0	0	0.0843991	0	0	0.0501552	0.0716216	0.112605	0	0.0444635	0.0361664	0.0445	0	0.030209	0.0158813	0	0	0.00391846	0	0.00863528	0.0310513	0.0314032	0.0377904	0.0583778	0	0	0.0245842	0.0659328	0	0	0.0626631	0.0695632	0	0	0
ASV378	Bacteria	Pseudomonadota	Deltaproteobacteria	0	0	0.0683564	0	0	0	0	0.0406472	0	0.0751615	0.0379759	0	0	0	0	0.0922428	0	0.0797604	0	0	0	0	0.042381	0.0423183	0.0411941	0.0294938	0.0850354	0	0	0.0475511	0	0	0	0	0	0	0.11105	0.10846	0.0502878	0	0.0628596	0.0422016	0	0.0742685	0	0
ASV379	Bacteria	Verrucomicrobiota	Opitutia	0	0.0358889	0.0410139	0.0391484	0.0306453	0.0268055	0.050435	0.0446128	0.022167	0.0254579	0.0275325	0.0487805	0	0.0454457	0.018437	0	0.0262718	0.0504607	0.035189	0.0404858	0.0237139	0.026522	0	0.0722938	0	0	0.0393682	0.0521269	0	0	0	0.0218509	0.0217407	0	0.0228932	0	0.0410032	0.0101229	0.0156451	0.0556135	0.0435182	0	0	0.039725	0.0168317	0.0169037
ASV380	Bacteria	Gemmatimonadota	Gemmatimonadia	0.0517427	0.0446186	0.0519509	0	0.0394011	0.0574405	0.0522363	0	0.0475007	0.0569773	0	0	0	0	0	0	0.0573203	0.0553439	0	0	0.0429814	0	0	0	0.0315821	0.0374345	0	0	0.0372253	0.0317007	0.0259058	0.0529021	0.0483127	0.0591502	0.0377739	0	0	0.0347072	0.0391127	0	0	0.0434805	0	0	0	0
ASV381	Bacteria	Chloroflexota	Chloroflexia	0	0	0.0519509	0.0421598	0	0	0	0.0664234	0	0.0363685	0.0408241	0.0694184	0	0	0.102428	0.0614952	0	0	0	0.064301	0	0	0.0402619	0.0634775	0	0	0.0629892	0.0375799	0	0	0	0	0	0	0	0.125772	0.0563794	0	0.0134101	0.106593	0.106378	0	0.0405785	0.0932675	0.0157797	0
ASV382	Bacteria	Pseudomonadota	Deltaproteobacteria	0.0517427	0.0300691	0	0	0.0503459	0.0593551	0.04323	0	0.0459173	0.0193965	0	0	0	0.0389535	0	0	0.0525436	0.0358108	0.0281512	0	0.0578026	0.0361664	0.0254286	0.0105796	0.0384478	0.0397032	0	0	0.055838	0.033682	0.060447	0.0379515	0.0507283	0.0509349	0.0228932	0	0	0.0477223	0.0424652	0	0	0.0255768	0.0376801	0	0	0
ASV383	Bacteria	Unclassified Bacteria	Unclassified Bacteria	0.0543961	0.0252192	0	0	0.064574	0	0	0	0.0475007	0	0	0	0	0	0	0	0	0.0309275	0	0	0.0889271	0	0	0	0.0439404	0.0862128	0	0	0.0342865	0.0931209	0.0846257	0.0632526	0.0845472	0.0624363	0.0286166	0	0	0.0665221	0	0	0	0.0728938	0	0	0	0
ASV384	Bacteria	Chloroflexota	Chloroflexia	0.0411288	0.0213393	0.0246083	0	0.0415901	0.0536111	0.036025	0.0257763	0.0190003	0.0339439	0.0256337	0.011257	0	0.0519379	0	0.0395326	0.0238834	0.0537162	0	0.0357228	0.037053	0.0554551	0.0508572	0	0.0233433	0.0204188	0	0	0	0	0.0397223	0.0345014	0.0386501	0.0476488	0.0366292	0.0591869	0.0222101	0.0173536	0.0447002	0.0393929	0	0.0370863	0.0260862	0.0172718	0	0
ASV385	Bacteria	Planctomycetota	Unclassified Planctomycetota	0.0437823	0.096997	0	0	0.0481569	0	0.145901	0	0.0459173	0.0509159	0.0541156	0	0	0.110368	0	0	0	0	0	0	0	0.0964436	0.0762857	0	0.0219702	0	0	0	0	0	0.0414493	0.0437018	0	0.0230029	0.0824157	0	0	0.0245842	0.0447002	0	0	0	0	0	0	0
ASV386	Bacteria	Planctomycetota	Unclassified Planctomycetota	0.0358218	0.0164895	0.0341782	0	0.0164171	0.0287202	0.021615	0.0584923	0.0174169	0.0327316	0.0408241	0.0637899	0	0.0227228	0.0430196	0	0.0262718	0.027672	0	0.0500119	0	0.0168776	0	0.0458449	0.00961195	0.0113438	0	0.090919	0.0166534	0	0	0.0184007	0.0193251	0.0394335	0.0343399	0.0961787	0.0495455	0.021692	0.00894005	0.0393929	0.04513	0.0127884	0	0	0	0
ASV387	Bacteria	Pseudomonadota	Alphaproteobacteria	0.0172476	0.0281291	0.0382796	0.0466769	0.00656685	0	0	0.0337074	0	0.016972	0.0322795	0.0600375	0	0.0681685	0	0	0	0.0325553	0	0.0333413	0.0163033	0	0	0	0.020597	0.0102094	0.0598397	0.0824332	0	0	0	0	0	0.0377904	0.0286166	0	0	0.0260304	0.0223501	0.0324412	0	0	0	0.0328163	0.0715345	0
ASV388	Bacteria	Acidobacteriota	Unclassified Acidobacteriota	0	0	0.0560523	0.0677568	0	0	0	0.0644407	0	0	0.050318	0.0619137	0	0	0.0921848	0.12299	0	0	0	0.0976423	0	0	0	0.118139	0	0	0.0834606	0.0436411	0	0	0	0	0	0	0	0.0961787	0.0837149	0	0	0.0556135	0.0789775	0	0	0.0794501	0.0147277	0
ASV389	Bacteria	Acidobacteriota	Unclassified Acidobacteriota	0.0384753	0.0232793	0.042381	0.061734	0.0175116	0	0	0.0614665	0	0	0	0.0900563	0.104639	0	0	0	0	0.0309275	0.0563023	0	0	0	0	0.0793469	0	0	0	0.0630372	0	0	0	0.0356514	0	0.0443627	0.0492205	0	0	0	0.0469352	0.0973236	0.0628596	0.0639419	0	0	0.0410272	0
ASV390	Bacteria	Acidobacteriota	Unclassified Acidobacteriota	0	0	0.0273426	0.061734	0	0	0	0.0406472	0	0	0.0408241	0.0731707	0	0	0.040971	0	0	0	0	0	0	0	0	0	0	0	0	0.105466	0	0	0	0	0	0	0	0	0	0	0	0.0347584	0.0241768	0	0	0.0379979	0.098886	0.161793
ASV391	Bacteria	Pseudomonadota	Deltaproteobacteria	0	0	0.0396467	0.0286084	0	0	0	0.0584923	0	0	0.0246843	0.0694184	0	0	0.0245826	0	0	0	0	0.0261967	0	0	0.0148333	0.0352653	0	0	0	0.144258	0	0	0	0	0	0	0	0	0.0273355	0	0	0.0347584	0.0402946	0	0	0	0.0641707	0.101422
ASV392	Bacteria	Planctomycetota	Unclassified Planctomycetota	0.0371486	0.032979	0.0601537	0.0602283	0.0197006	0.0344643	0.0270188	0.0545267	0	0.0303071	0.0303807	0.0450281	0	0.0357073	0.0737478	0.0790653	0	0	0	0.0309598	0	0	0.0211905	0.0528979	0	0	0.0330693	0.0303063	0	0	0	0.0103504	0	0	0.0217486	0	0.0700472	0	0.0178801	0.0278067	0.0757539	0	0	0.0552696	0.0326113	0
ASV393	Bacteria	Pseudomonadota	Alphaproteobacteria	0.0305149	0.0252192	0.0396467	0.0225856	0.0197006	0.11871	0.0468325	0.0495697	0	0.0375808	0.0389253	0	0	0	0	0.166916	0	0	0	0	0	0	0	0	0	0.0374345	0.0377935	0.0484901	0	0	0.0276329	0.0299012	0	0	0.0297612	0	0.0888403	0.054953	0.0178801	0	0	0.0434805	0	0	0	0.0482963
ASV394	Bacteria	Chloroflexota	Chloroflexia	0.019901	0.0562582	0	0	0.020795	0.0459524	0.0594413	0	0.0364172	0.0460667	0	0	0.0523195	0.0681685	0	0	0	0.0520884	0.109086	0	0.0340887	0.026522	0.0317857	0	0.060418	0.0181501	0.0472419	0	0	0	0	0.050602	0.0652221	0	0.0641011	0.0480894	0	0	0.0625803	0	0	0.0613842	0.0463755	0	0	0
ASV395	Bacteria	Chloroflexota	Chloroflexia	0	0	0.0396467	0.0662511	0	0	0	0.101122	0.0316671	0	0.0170891	0.131332	0	0	0.0757964	0.114205	0	0	0	0	0	0	0	0.067004	0	0	0.0677133	0.0594004	0	0	0	0.0437018	0	0	0	0	0.0392947	0	0	0.0926891	0.0660832	0	0	0.0483609	0.0525989	0
ASV396	Bacteria	Pseudomonadota	Gammaproteobacteria	0.0371486	0	0	0	0.0481569	0	0	0	0.0174169	0.0448545	0	0	0	0	0	0	0.0382135	0.0423218	0	0	0.0444635	0.0554551	0.0508572	0	0.0274627	0.0204188	0	0	0.136166	0.0653828	0.031087	0.025301	0.0821316	0.0312182	0.0492205	0	0	0.0506146	0.0346427	0	0	0.0319709	0.0579693	0	0	0
ASV397	Bacteria	Planctomycetota	Unclassified Planctomycetota	0	0.0252192	0.0615208	0	0	0	0	0.0396558	0	0.0315194	0.0256337	0.0562852	0	0	0.0880877	0.0966353	0	0	0	0.0785901	0	0.053044	0.103833	0.0722938	0	0	0.103932	0.0290941	0	0	0	0	0	0	0	0	0.0632133	0	0.0312902	0.148303	0.0596361	0	0	0.058724	0	0
ASV398	Bacteria	Pseudomonadota	Unclassified Pseudomonadota	0.0530694	0.064018	0.0205069	0	0.0711409	0.0574405	0.05764	0	0.0570008	0.0581896	0	0	0	0.0746608	0	0	0	0.0292997	0	0.0261967	0	0.0626884	0.0360238	0	0	0.0340314	0.0110231	0	0	0	0	0.0437018	0.0773003	0	0.0469312	0	0.0102508	0	0.0368777	0.0185378	0	0.0690572	0.0521724	0	0	0
ASV399	Archaea	Methanobacteriota	Unclassified Methanobacteriota	0	0	0	0.0858253	0	0	0	0.0456042	0	0	0	0.0956848	0	0	0	0	0	0	0	0	0	0	0	0	0	0	0	0.117589	0	0	0	0	0	0	0	0	0	0	0	0	0.0435182	0	0	0	0.128341	0.115911
ASV400	Bacteria	Pseudomonadota	Gammaproteobacteria	0.0623565	0	0	0	0.045968	0.0287202	0.0180125	0	0.0364172	0.0266702	0	0	0.0639461	0.0324612	0	0	0.0788154	0.0439496	0.0281512	0	0.0355708	0	0	0	0.0480598	0.0589877	0	0	0.0509399	0.0713267	0.0587199	0.0540522	0.0845472	0.0690086	0.0148806	0	0	0.0563991	0	0	0	0.0383651	0	0	0	0
ASV401	Bacteria	Pseudomonadota	Alphaproteobacteria	0.0384753	0.0562582	0	0	0.0306453	0.0650992	0.0522363	0	0.0348338	0.0606141	0	0	0	0	0.0737478	0.0483177	0.0334368	0.0537162	0	0	0.025196	0.0602773	0.0508572	0	0.0260896	0.0442408	0	0	0	0	0	0.0391016	0	0.0295751	0.0423525	0	0	0.0419378	0.0581103	0.0393929	0	0	0.0637663	0	0	0
ASV402	Bacteria	Candidatus Poribacteriota	Unclassified candidatus Poribacteriota	0	0.0475285	0.0601537	0	0	0	0	0.0584923	0	0	0.0408241	0	0	0	0.100379	0.0746728	0	0	0.175945	0.116694	0	0	0	0.0952163	0	0	0.103932	0	0	0	0	0	0	0	0	0.151666	0.0666302	0	0	0.120496	0.0548007	0	0	0.0535424	0	0
ASV403	Bacteria	Pseudomonadota	Alphaproteobacteria	0	0.0455886	0.0601537	0	0.0218895	0	0.0594413	0.0317246	0.0332505	0.047279	0.055065	0	0	0	0.059408	0	0	0.0423218	0	0.0452489	0	0	0.0720476	0.0476081	0.0288359	0	0.0393682	0	0	0	0	0.0299012	0	0	0.0492205	0	0.0495455	0	0.0636978	0.0648824	0.0290121	0	0	0	0	0
ASV404	Bacteria	Verrucomicrobiota	Unclassified Verrucomicrobiota	0	0	0.0205069	0.0135514	0	0	0.0270188	0	0	0	0.0170891	0.0206379	0	0.0292151	0.0122913	0	0	0	0	0	0	0.00964436	0	0	0	0	0	0.0169715	0	0	0	0	0	0	0.0091573	0.0554877	0.0273355	0	0	0.0324412	0	0	0	0	0.0441831	0.161793
ASV405	Archaea	Methanobacteriota	Unclassified Methanobacteriota	0	0.0203694	0.0683564	0.025597	0	0.042123	0	0.0416386	0	0.0545527	0.0854457	0	0	0	0.0655536	0	0	0	0	0	0	0.0385775	0.0508572	0.0440816	0	0	0.0708628	0	0	0	0	0	0	0	0.0343399	0	0.0495455	0	0.0223501	0.0648824	0.0725303	0.0191826	0.0637663	0.0949946	0	0
ASV406	Bacteria	Chloroflexota	Dehalococcoidia	0.0172476	0.0300691	0.0410139	0	0.0087558	0	0.102671	0.037673	0	0	0.0161398	0	0	0.139583	0	0.127383	0	0	0	0.130984	0	0	0	0.067004	0.0288359	0.0102094	0.0267704	0.0448534	0	0	0	0.0149506	0	0	0.0377739	0.177561	0.0751726	0	0	0.0741513	0.0564125	0	0	0.0414522	0	0
ASV407	Bacteria	Pseudomonadota	Deltaproteobacteria	0.120733	0.0775976	0	0	0.0536293	0.0153175	0.050435	0	0.0364172	0.0181842	0	0	0.0755726	0	0	0	0.0453786	0.0309275	0	0	0.0311245	0	0	0	0.0494329	0.0306282	0	0	0	0	0	0.0644026	0.0966254	0.0410765	0.0194593	0	0	0.021692	0.0335252	0	0	0.0741726	0	0	0	0
ASV408	Bacteria	Pseudomonadota	Deltaproteobacteria	0	0.063048	0.0396467	0	0	0.103393	0.138696	0	0	0.0739493	0.0408241	0	0	0.0779069	0	0.0439252	0	0.0374386	0.0844535	0	0	0.0699216	0.0847619	0	0.0260896	0	0	0	0	0	0	0	0	0	0.0629564	0.110975	0	0	0.0514053	0	0	0	0.115939	0	0	0
ASV409	Bacteria	Pseudomonadota	Deltaproteobacteria	0.0145941	0.0155195	0.0150384	0.0225856	0.0186061	0.0287202	0.0180125	0.0247849	0	0.0230334	0.0275325	0.0318949	0.0290664	0.0292151	0.0225341	0	0	0.0130221	0.0246323	0.0238152	0.00889271	0.0361664	0.0190714	0.0387918	0.0164776	0.0124782	0.0220462	0.0654617	0.00979614	0.00990648	0	0.0138006	0.00966254	0.0147876	0.0217486	0.0221951	0.0136677	0.0159074	0.00894005	0.0278067	0.0241768	0.0166249	0.0202893	0.029362	0.0452351	0.0434667
ASV410	Bacteria	Chloroflexota	Chloroflexia	0	0	0	0.0542054	0	0	0	0.0604751	0	0	0	0.0393996	0	0	0.131107	0.12299	0	0	0	0	0	0	0	0.116375	0	0	0	0.11274	0.0646545	0	0	0	0	0	0	0	0.0956742	0	0	0.118179	0.166014	0	0	0	0.0199876	0
ASV411	Bacteria	Pseudomonadota	Deltaproteobacteria	0.0809308	0.0126096	0	0	0.0361177	0	0	0	0.0411672	0.016972	0	0	0	0	0	0	0.0477669	0	0	0	0.0459457	0	0	0	0.0370747	0.0646596	0	0	0.107758	0.0812332	0.0967151	0.049452	0.0483127	0.0509349	0	0	0	0.0650759	0	0	0	0.0460382	0	0	0	0
ASV412	Bacteria	Chloroflexota	Chloroflexia	0.0145941	0.0349189	0	0	0.0153227	0.0287202	0.0342238	0	0.0332505	0.0278825	0	0	0	0.0519379	0.0245826	0	0.0358252	0.0455774	0.0457457	0	0.0666953	0.0506329	0.0572143	0	0.0453135	0.0272251	0.0299198	0	0	0.0297194	0.0535387	0.0345014	0.0314032	0.0410765	0.0412078	0	0	0.0187997	0.0558753	0.0440273	0	0.0345286	0.0347816	0	0	0
ASV413	Bacteria	Acidobacteriota	Terriglobia	0.0597031	0.0552883	0	0	0.0383066	0.0593551	0.0630438	0	0.0332505	0.0266702	0.0218361	0	0	0	0	0	0	0.0553439	0	0.0476304	0.0385351	0.0482218	0	0	0.0288359	0.0192844	0	0	0	0.0257569	0.0207247	0.0379515	0.0603908	0.0394335	0.0423525	0	0	0.0404917	0.0547578	0	0	0.0281344	0.0347816	0	0	0
ASV414	Bacteria	Pseudomonadota	Unclassified Pseudomonadota	0.06501	0.0426787	0	0	0.0755188	0.0306349	0.0486338	0	0.0696677	0.0206088	0	0	0.0871992	0.0357073	0	0	0.0859804	0.00976658	0.0281512	0	0.0414993	0	0	0	0.0576717	0	0	0	0	0.0495324	0	0.0517521	0.0917941	0.0345043	0.0228932	0	0	0.0578453	0.0245851	0	0	0.0409228	0.0173908	0	0	0
ASV415	Bacteria	Pseudomonadota	Deltaproteobacteria	0.06501	0.0271592	0	0	0.0547238	0.036379	0.0450313	0	0.0760011	0.0509159	0.00664578	0	0.0697593	0.0876453	0	0	0.069262	0.0292997	0	0	0.0518741	0	0	0	0.0686568	0	0	0	0	0	0.0483576	0.0391016	0.0579752	0.0312182	0.0297612	0	0	0	0.0368777	0	0	0.05499	0.043477	0	0	0
ASV416	Bacteria	Planctomycetota	Unclassified Planctomycetota	0.0305149	0.031039	0.0341782	0	0.0328343	0.0325496	0.05764	0.0495697	0	0.047279	0.055065	0	0	0.0292151	0	0.0263551	0.0358252	0.0195332	0.0316701	0.059538	0.0192675	0.0120555	0.0190714	0.0229224	0	0.0102094	0.0409429	0	0.0137146	0	0	0.0218509	0.0169094	0	0.0286166	0	0.0307524	0.0245842	0.0268201	0.030124	0	0.0166249	0.0521724	0.0569968	0	0
ASV417	Bacteria	Bacillota	Bacilli	0	0.469465	0.110737	0	0	0	0	0	0	0	0	0	0	0	0	0	0	0	0.0316701	0	0	0	0	0	0	0.0442408	0	0	0.043103	0	0	0	0	0	0	0	0	0	0	0	0	0	0	0	0	0
ASV418	Bacteria	Thermoproteota	Nitrososphaeria	0.0384753	0.0387988	0.042381	0	0.0591017	0.0459524	0.0324225	0.0208193	0.0459173	0.0715247	0	0	0.0465062	0.0584302	0.0286797	0	0	0	0	0	0	0	0	0	0.0315821	0.0589877	0	0	0.0411438	0.0614202	0	0.0299012	0	0.0476488	0.0446418	0	0	0.0289226	0	0	0	0.0294133	0.0260862	0.0241805	0	0
ASV419	Bacteria	Chloroflexota	Dehalococcoidia	0	0.0290991	0	0.0286084	0.0175116	0.0210615	0	0.0247849	0.0190003	0.0303071	0.0484193	0.0243902	0	0	0	0	0	0.00976658	0	0.0238152	0	0	0	0.0722938	0	0	0.0440924	0.100617	0	0	0	0	0	0	0.0171699	0.0739836	0.0597964	0	0	0	0.0499653	0.0230191	0	0.029362	0.098886	0
ASV420	Bacteria	Chloroflexota	Chloroflexia	0	0	0.0587865	0.0496883	0	0	0	0.0406472	0	0.0133351	0.0541156	0.054409	0	0	0.0471167	0.0878503	0	0	0	0.0333413	0	0	0	0.0476081	0	0	0.0440924	0.104254	0	0	0	0	0	0	0.0137359	0.0480894	0.051254	0	0.0257026	0.030124	0.0725303	0	0.0318831	0.0431794	0.0399752	0.0217334
ASV421	Bacteria	Nitrospinota	Nitrospinia	0	0	0.0451152	0.103894	0	0.0344643	0	0.0446128	0	0.0193965	0.0636096	0.0393996	0	0	0.0245826	0.0746728	0	0.034183	0	0	0	0	0	0.0370285	0	0	0.0708628	0.0618249	0	0	0	0	0	0	0.0206039	0	0.0580879	0	0.0178801	0.0903719	0.0580243	0	0	0.0259076	0.048391	0
ASV422	Bacteria	Chloroflexota	Chloroflexia	0.0318416	0.0242492	0	0	0.0339287	0	0.02882	0	0.0205836	0.0315194	0	0	0.0465062	0	0	0	0.0501552	0.0406941	0	0	0.0518741	0.0458107	0.0508572	0	0.030209	0.0487783	0	0	0.0626953	0.0515137	0.0639011	0.0310513	0.026572	0.0476488	0.0480758	0	0	0.0318149	0.0156451	0	0	0.0319709	0.0492739	0	0	0
ASV423	Bacteria	Pseudomonadota	Alphaproteobacteria	0.0796041	0.0126096	0	0	0.0470624	0	0	0	0.0364172	0	0	0	0	0	0	0	0.0382135	0.0244164	0	0	0.0489099	0	0	0	0.0700299	0.0782721	0	0	0.0626953	0.0257569	0.0673552	0.0529021	0.0483127	0.0410765	0.0183146	0	0	0.0578453	0.0156451	0	0	0.0383651	0.0405785	0	0	0
ASV424	Bacteria	Chloroflexota	Chloroflexia	0	0.0552883	0.0341782	0	0.0317398	0.0650992	0.111678	0.0307332	0.0348338	0.0460667	0	0	0	0	0	0.0966353	0	0.0439496	0.144275	0	0	0	0.101714	0.0387918	0.0260896	0	0.034644	0	0	0	0	0.0368015	0.0603908	0	0	0.0628861	0	0.021692	0.0257026	0.0463446	0	0.0153461	0	0	0	0
ASV425	Bacteria	Chloroflexota	Chloroflexia	0.0344951	0.0271592	0.0136713	0	0.0328343	0.0382936	0.050435	0	0.0285004	0.0230334	0.0180385	0	0.0348797	0.0486918	0	0	0.0286601	0.0292997	0.0316701	0.0214337	0.0459457	0.0313442	0.0381429	0	0.0219702	0.0476439	0	0	0.0411438	0.033682	0.0708093	0.025301	0.0289876	0.0295751	0.0263272	0	0	0.033261	0.0245851	0	0	0.0345286	0.0260862	0	0	0
ASV426	Bacteria	Pseudomonadota	Unclassified Pseudomonadota	0.0490892	0.0475285	0	0	0.0634796	0	0.0666463	0	0.0538341	0.0375808	0	0	0	0	0	0	0.0597086	0.0537162	0	0	0.0696596	0	0	0	0.050806	0	0	0	0	0	0	0.0437018	0	0.0920114	0.0309059	0	0	0.0477223	0.0391127	0	0	0.0524323	0.0608678	0	0	0
ASV427	Bacteria	Chloroflexota	Chloroflexia	0	0.0678979	0	0	0	0	0.07205	0	0	0.0618264	0.0341783	0	0	0.10063	0.0860391	0	0	0.104177	0	0	0	0.106088	0.0932381	0	0	0	0	0	0	0	0	0	0	0	0.108743	0	0	0	0.0871654	0	0.067695	0	0	0	0	0
ASV428	Bacteria	Chloroflexota	Chloroflexia	0	0.00678979	0.0164055	0.0526997	0.0153227	0.042123	0.0234163	0.0396558	0	0.0121228	0.0208867	0.0581614	0	0	0	0.0878503	0.0167184	0.0309275	0	0.0547749	0.0192675	0	0	0.0458449	0.030209	0.0192844	0.0236209	0.0606127	0	0.019813	0	0.0161007	0	0	0	0	0.0222101	0.0187997	0.0312902	0.0393929	0.0306239	0	0.0347816	0.0224533	0	0
ASV429	Bacteria	Unclassified Bacteria	Unclassified Bacteria	0.045109	0.0552883	0	0	0.0350232	0.0210615	0	0	0.0300838	0	0	0	0	0.0486918	0	0	0.069262	0.0292997	0.0422268	0	0.037053	0.0313442	0.0211905	0	0.0480598	0.0260907	0	0	0.043103	0.0416072	0.0466305	0.0402516	0.0676378	0.0361473	0.0309059	0	0	0.054953	0.0245851	0	0	0.0358075	0.0289847	0	0	0
ASV430	Bacteria	Planctomycetota	Unclassified Planctomycetota	0	0.0465585	0.0601537	0	0	0.0555258	0.0882613	0.0148709	0	0.0484913	0.050318	0	0	0.0746608	0.0348254	0	0	0.0504607	0.0527834	0.0404858	0	0.0723327	0.0635714	0.0123428	0	0	0	0	0	0	0	0	0	0	0.0515098	0.040691	0.0358778	0	0.0581103	0.0602479	0	0	0.0260862	0.0345435	0	0
ASV431	Archaea	Methanobacteriota	Unclassified Methanobacteriota	0	0	0	0	0	0	0	0	0	0	0	0.0731707	0	0	0	0	0	0	0	0	0	0	0	0	0	0	0	0.0678862	0	0	0	0	0	0	0	0	0	0	0	0	0.0177296	0	0	0	0.096782	0.272874
ASV432	Bacteria	Chloroflexota	Chloroflexia	0	0	0	0.0707682	0	0	0	0.0584923	0	0	0	0.106942	0	0	0	0	0	0	0	0	0	0	0	0.0546612	0	0	0	0.100617	0	0	0	0	0	0	0	0	0	0	0	0	0.103154	0	0	0	0.123081	0.0869334
ASV433	Archaea	Unclassified Archaea	Unclassified Archaea	0.0225545	0.0436486	0.0587865	0.0225856	0.0328343	0.036379	0.021615	0.0208193	0	0.0278825	0.0265831	0.0187617	0	0.0324612	0	0.0395326	0	0	0.0211134	0.0285782	0	0.0602773	0.0572143	0.0246857	0.0137314	0	0.034644	0.0266696	0	0	0	0.0264511	0	0	0.0400632	0.0591869	0.0307524	0	0.0212326	0.0463446	0.0322357	0	0.0260862	0.0345435	0.0284034	0
ASV434	Bacteria	Pseudomonadota	Oligoflexia	0.0172476	0.0290991	0	0.0572169	0.022984	0	0	0.0505611	0.0142502	0.0145474	0.0237349	0.0487805	0	0	0	0.0702802	0	0.027672	0.0246323	0	0.0207497	0	0.0254286	0.0317388	0.0192239	0.0124782	0.0314946	0.0933435	0	0.0237756	0	0.0195508	0.0410658	0.0246459	0.0148806	0	0.0324609	0.0202458	0.0145276	0.0440273	0.0419064	0.0230191	0	0	0.0136757	0
ASV435	Bacteria	Chloroflexota	Chloroflexia	0.0371486	0.0300691	0	0	0.0394011	0.0536111	0.036025	0	0.0459173	0.0351562	0	0	0	0	0	0	0.0597086	0.0553439	0.0879724	0	0.0474278	0	0.042381	0	0.0315821	0.0215532	0	0	0	0	0	0.0333514	0.045897	0.027932	0.0663904	0	0	0.0260304	0.0458177	0	0	0.047317	0.0782586	0	0	0
ASV436	Bacteria	Pseudomonadota	Gammaproteobacteria	0.727051	0	0	0	0	0	0	0	0	0	0	0	0	0.0324612	0	0	0	0	0	0	0	0	0	0	0	0	0	0	0	0	0	0	0	0	0	0	0	0	0	0.0903719	0	0	0	0.0466337	0	0
ASV437	Bacteria	Unclassified Bacteria	Unclassified Bacteria	0.0464357	0.064018	0	0	0.0404956	0	0.0342238	0	0.0522507	0.0497036	0	0	0	0	0	0	0.0525436	0.0325553	0	0	0.0726238	0.0650995	0	0	0.0398209	0.0340314	0	0	0.0274292	0.0515137	0	0.0448518	0.0579752	0	0	0	0	0.0477223	0	0	0	0.0613842	0.0492739	0	0	0
ASV438	Bacteria	Pseudomonadota	Alphaproteobacteria	0	0	0.0915976	0.0632397	0	0	0	0.0475869	0	0	0.0996867	0	0	0	0.122913	0	0	0	0	0.169088	0	0	0	0.107559	0	0	0	0.0181838	0	0	0	0	0	0	0	0	0.0888403	0	0	0.23404	0	0	0	0	0	0
ASV439	Bacteria	Chloroflexota	Chloroflexia	0.0504159	0	0	0	0.0547238	0	0	0	0	0	0	0	0	0	0	0	0.10031	0	0	0	0.0607668	0	0	0	0.0439404	0.0578533	0	0	0.0519196	0.110953	0.100169	0.0379515	0.106288	0.0640794	0	0	0	0.0621837	0	0	0	0.0511535	0	0	0	0
ASV440	Bacteria	Pseudomonadota	Gammaproteobacteria	0	0	0	0	0	0	0	0	0	0	0	0	0	0	0	0	0	0	0	0	0	0	0	0	0	0	0	0	0	0.0951022	0	0	0	0	0	0	0	0	0	0	0	0.429689	0	0	0.094678	0.140059
ASV441	Bacteria	Chloroflexota	Chloroflexia	0	0	0	0	0	0	0	0.032716	0.049084	0	0	0	0	0	0	0	0.0477669	0.0683661	0	0	0.0385351	0	0	0.0528979	0.0645374	0.0669283	0.0551155	0.0375799	0.0528992	0	0	0.0322013	0	0	0	0	0	0.0650759	0.0458177	0	0	0.0626631	0.0637663	0.0431794	0	0
ASV442	Bacteria	Chloroflexota	Dehalococcoidia	0.0437823	0	0	0	0.0525348	0	0	0	0.0760011	0	0	0	0.0755726	0	0	0	0.062097	0	0	0	0.0844807	0	0	0	0.0343284	0.0533158	0	0	0.0656342	0.0634015	0.0759905	0.0667027	0	0.0509349	0	0	0	0.0477223	0	0	0.0209532	0.0511535	0	0	0	0
ASV443	Bacteria	Unclassified Bacteria	Unclassified Bacteria	0.0119406	0.0184294	0.0205069	0.0286084	0.0131337	0.0229762	0.0270188	0.0267677	0.00950013	0.0157597	0.0199373	0.0300188	0	0.0324612	0	0.0131775	0.0191068	0.0195332	0.0387079	0.0214337	0.0177854	0.026522	0.0317857	0.0317388	0.0137314	0.0181501	0.0220462	0.0484901	0.0166534	0.0138691	0.0138164	0.00805033	0.0217407	0.0180737	0.0206039	0.0258943	0	0.0130152	0.0122926	0.0231723	0.0145061	0.0204614	0	0.0103631	0.0273514	0.0338074
ASV444	Bacteria	Planctomycetota	Unclassified Planctomycetota	0	0.0611081	0	0	0.0361177	0.0861607	0.050435	0	0.044334	0.0654633	0	0	0	0.0584302	0	0	0	0.0358108	0.0633401	0	0.0474278	0.0482218	0.0317857	0	0.030209	0	0	0	0	0	0	0.024151	0.0434814	0.0361473	0.0503651	0	0	0.0462762	0.0301727	0	0	0.0447593	0.043477	0	0	0
ASV445	Bacteria	Actinomycetota	Unclassified Actinomycetota	0.0570496	0	0	0	0.0503459	0	0	0	0.0649176	0	0	0	0	0.0454457	0	0	0.112252	0.0260442	0	0	0.062249	0	0	0	0.0686568	0	0	0	0.0499603	0.120859	0	0.0471519	0	0.0657225	0	0	0	0.120029	0	0	0	0.047317	0	0	0	0
ASV446	Bacteria	Chloroflexota	Chloroflexia	0	0.0349189	0.0232412	0	0.0306453	0.0631845	0.01441	0	0.0285004	0.0254579	0.0427229	0	0	0	0	0	0	0.0504607	0	0	0.0296424	0.0626884	0.0550953	0.0423183	0.0247164	0	0.0377935	0	0	0	0	0.0230009	0.0483127	0.0328612	0.0274719	0.0776828	0	0.0361533	0.0290551	0.0695169	0	0.0319709	0	0.0431794	0	0
ASV447	Bacteria	Pseudomonadota	Deltaproteobacteria	0.0106139	0.0126096	0.0328111	0.025597	0	0.0210615	0.0162113	0.0307332	0	0.0266702	0.0208867	0.0206379	0	0.025969	0.0225341	0.00878503	0.00716503	0	0.00703779	0.0238152	0	0.00964436	0.0190714	0.0370285	0.00823882	0	0.0141726	0.0278818	0	0	0	0	0	0	0.0194593	0.0258943	0.0341693	0	0.0189976	0.0115861	0.0257886	0	0.0231877	0.0172718	0.0305074	0.0652001
ASV448	Bacteria	Chloroflexota	Chloroflexia	0.019901	0	0.0259754	0.0542054	0	0.0191468	0	0.0535353	0	0.016972	0.0180385	0.0900563	0	0	0	0	0	0.0227887	0	0	0.0429814	0	0	0	0	0.0453751	0.0283451	0	0.0421234	0.0237756	0.060447	0.0172507	0	0.0246459	0.0194593	0.0369918	0.0700472	0.0289226	0	0.0440273	0	0.0166249	0	0.0241805	0.0399752	0
ASV449	Bacteria	Pseudomonadota	Gammaproteobacteria	0	0.0126096	0.0451152	0.0406541	0	0.0516964	0.0324225	0.0366816	0	0.016972	0.0484193	0.0412758	0	0	0.0430196	0.0351401	0	0	0.0527834	0.0547749	0	0.0747438	0.0360238	0.067004	0	0	0.0314946	0.0412166	0	0	0	0	0	0	0.0091573	0.0480894	0.0444201	0	0.0268201	0.0532963	0.0548007	0	0	0.0345435	0.00841583	0
ASV450	Bacteria	Planctomycetota	Unclassified Planctomycetota	0	0	0.0656222	0.0542054	0	0.0708432	0.0612425	0.0565095	0	0.0266702	0.0655084	0.065666	0	0	0.0676022	0.0527102	0	0	0	0.0500119	0	0.0602773	0	0.0476081	0	0	0	0.0509146	0	0	0	0	0	0	0	0	0.080298	0	0	0.0417101	0	0	0	0.029362	0.0136757	0
ASV451	Bacteria	Pseudomonadota	Gammaproteobacteria	0.06501	0	0	0	0.0383066	0	0	0	0.0554175	0.0412176	0	0	0	0	0	0	0.0668737	0.0683661	0	0	0.0829986	0	0	0	0.0549254	0	0	0	0	0	0	0.0598024	0.101457	0.0673655	0.0423525	0	0	0	0.0480527	0	0	0.0844033	0	0	0	0
ASV452	Bacteria	Actinomycetota	Unclassified Actinomycetota	0.045109	0	0	0	0.0394011	0	0	0	0.0332505	0	0	0	0	0.00649224	0	0	0.0453786	0.00651105	0	0	0.0296424	0	0	0	0.050806	0.0363001	0	0	0.176331	0.0515137	0.131256	0.0287512	0.0410658	0.0246459	0	0	0	0.033261	0	0	0	0.0422016	0	0	0	0
ASV453	Bacteria	Actinomycetota	Unclassified Actinomycetota	0	0	0.0656222	0	0	0	0	0.0485783	0	0	0.0303807	0	0	0	0	0	0	0	0	0	0	0	0	0	0.0219702	0	0	0.107891	0	0	0	0	0	0	0	0	0.0734641	0	0	0	0	0.0294133	0	0	0.114666	0.137645
ASV454	Bacteria	Pseudomonadota	Alphaproteobacteria	0	0	0	0.0481826	0	0	0.0270188	0.032716	0	0	0	0.065666	0	0	0.0471167	0	0	0	0	0.0404858	0	0	0	0	0	0	0	0.115164	0	0	0	0	0	0	0	0	0.0324609	0	0	0.0556135	0.0644714	0	0	0	0.0736385	0.137645
ASV455	Bacteria	Planctomycetota	Planctomycetia	0	0.0349189	0.0287097	0.025597	0	0.0325496	0.0414288	0.0515525	0.0205836	0.0303071	0.0237349	0.0694184	0	0	0.0553109	0.0263551	0.0167184	0.0162776	0.0387079	0	0	0.0337553	0.0127143	0	0	0	0.0188967	0.0678862	0	0	0	0	0	0.0197167	0.0137359	0	0.0410032	0	0.0257026	0	0.04513	0.0127884	0	0.0120902	0.049443	0
ASV456	Bacteria	Chloroflexota	Chloroflexia	0	0	0	0.0391484	0	0	0	0.0307332	0	0	0	0.0750469	0	0	0	0	0	0	0	0	0	0	0	0.0528979	0	0	0.0409429	0.0654617	0	0	0	0	0	0	0	0	0.0273355	0	0	0	0	0	0	0	0.142017	0.154548
ASV457	Bacteria	Chloroflexota	Chloroflexia	0	0.032009	0.0519509	0.0918481	0	0	0.0414288	0.0515525	0	0.0278825	0.0360771	0.0506567	0	0	0.0573594	0	0	0	0	0	0	0	0	0.0634775	0	0	0	0.0460656	0	0	0	0	0	0	0	0.0850812	0.0495455	0	0	0	0.0757539	0	0.0724617	0.039725	0.0515469	0
ASV458	Bacteria	Acidobacteriota	Unclassified Acidobacteriota	0	0	0.0164055	0	0	0	0	0.0713804	0	0	0.00949397	0	0	0	0	0	0	0	0	0	0	0	0	0.0634775	0	0	0.0267704	0.12365	0	0	0	0	0	0	0	0	0.0392947	0	0	0	0	0	0	0	0.142017	0.137645
ASV459	Archaea	Methanobacteriota	Thermococci	0	0.0339489	0.0656222	0.0542054	0	0.0402083	0	0.037673	0	0.0545527	0.0607614	0.0393996	0	0	0	0	0	0	0	0	0	0.0771549	0	0	0	0	0.092909	0.0703107	0	0	0	0	0	0	0.0446418	0	0	0	0	0	0.0531889	0	0	0.107085	0	0
ASV460	Bacteria	Pseudomonadota	Deltaproteobacteria	0.00928715	0.032009	0.0300768	0.0240913	0.00766133	0.0344643	0.05764	0.0208193	0.0142502	0.0303071	0.0446217	0	0	0	0.0307283	0	0	0.0162776	0.0246323	0.0333413	0	0.0144665	0.0254286	0.0352653	0.0164776	0	0.0440924	0.0133348	0	0	0	0.00575023	0	0	0.0240379	0.0517886	0.0222101	0.0115691	0.0245851	0.0370757	0.0306239	0	0.0289847	0.0172718	0.0273514	0.0193185
ASV461	Bacteria	Chloroflexota	Chloroflexia	0.0384753	0.032979	0	0	0.0218895	0.0248909	0.0378263	0	0.0459173	0.0278825	0.0180385	0	0.0465062	0.0649224	0	0	0.0310485	0.0439496	0	0	0.0696596	0.0699216	0	0	0.0288359	0.0226876	0	0	0	0.0396259	0	0.0345014	0.0289876	0.0575071	0.0206039	0	0	0.0318149	0.0245851	0	0	0.0511535	0.0289847	0	0	0
ASV462	Bacteria	Pseudomonadota	Deltaproteobacteria	0	0	0.0123042	0.0331255	0	0	0	0.0168537	0	0	0.0113928	0.0525328	0	0	0	0	0	0	0	0.0166706	0	0	0	0.0123428	0	0	0	0.0606127	0	0	0	0	0	0	0	0	0.0136677	0	0	0.00926891	0.0112825	0	0	0	0.046287	0.226993
ASV463	Bacteria	Acidobacteriota	Unclassified Acidobacteriota	0.0278614	0.0164895	0.0191398	0.0316198	0	0	0.0270188	0.0396558	0	0.0254579	0.0227855	0.0300188	0	0.0389535	0.040971	0.0395326	0	0	0	0.0261967	0	0.0385775	0.0254286	0.0387918	0.0329553	0	0.017322	0.0472779	0	0	0	0	0	0	0.0194593	0.0739836	0.0307524	0	0	0.0486618	0.0338475	0	0	0.0345435	0.0336633	0.0410519
ASV464	Bacteria	Planctomycetota	Unclassified Planctomycetota	0	0	0	0.0948595	0	0	0	0	0	0	0	0.0994371	0	0	0.0471167	0	0	0	0	0	0	0	0	0	0	0	0.0425177	0.0678862	0	0	0	0	0	0	0.0698244	0	0	0	0	0	0.0709186	0	0	0.0759957	0.0589108	0.101422
ASV465	Bacteria	Unclassified Bacteria	Unclassified Bacteria	0.0344951	0.0145495	0	0	0.0361177	0.0402083	0.021615	0	0.0617509	0.0157597	0	0	0	0	0	0	0.0525436	0.0162776	0	0	0.037053	0	0	0	0.0233433	0.0465095	0	0	0.0597565	0.0614202	0.0552658	0.0425517	0.0362345	0.0558641	0.0206039	0	0	0.0491685	0.0111751	0	0	0.0319709	0	0.0138174	0	0
ASV466	Bacteria	Pseudomonadota	Alphaproteobacteria	0	0	0	0.134008	0	0	0	0.080303	0	0	0	0.0243902	0	0	0	0	0	0.182309	0	0.0428673	0	0	0	0	0	0	0	0	0	0.0396259	0	0.106954	0	0	0	0	0	0	0	0	0.0322357	0	0.0376801	0.205534	0	0
ASV467	Bacteria	Pseudomonadota	Gammaproteobacteria	0	0	0.0492166	0.0572169	0	0	0	0.0297418	0	0	0.0199373	0	0	0	0.0245826	0.0571027	0	0	0	0.0452489	0	0	0	0.0916897	0	0	0.0314946	0.0642494	0	0	0	0	0	0	0	0	0.0563794	0	0	0	0	0	0	0.0449066	0.0515469	0.101422
ASV468	Bacteria	Chloroflexota	Dehalococcoidia	0	0	0	0	0	0.128284	0	0.0763374	0	0	0	0	0	0	0	0.101028	0	0	0	0.0690641	0	0	0	0.151641	0	0	0	0	0	0	0	0	0	0	0.084705	0.207154	0	0	0.0625803	0.252578	0	0	0	0	0	0
ASV469	Bacteria	Bacteroidota	Unclassified Bacteroidota	0	0.0184294	0.0410139	0	0.0547238	0	0.0594413	0.0307332	0	0	0.0455711	0	0	0	0.0368739	0.0395326	0.0549319	0.027672	0	0	0	0.0458107	0.0360238	0	0	0.0521814	0.0440924	0	0	0.0772706	0	0.0184007	0	0	0.0206039	0	0.0461286	0	0.0234676	0.0486618	0.0306239	0.0345286	0	0	0	0
ASV470	Bacteria	Bacteroidota	Unclassified Bacteroidota	0.0172476	0.00872973	0.0246083	0.0240913	0.0087558	0.0268055	0.00540375	0.0247849	0.00791678	0.0218211	0.0294313	0.0469043	0	0	0.0204855	0.263551	0	0.00813882	0.119642	0	0.00148212	0.0241109	0.0720476	0.0282122	0.00274627	0.00453751	0.0267704	0.014547	0.00489807	0	0.00172706	0.00575023	0.0169094	0.00492918	0.0251826	0.081382	0.0461286	0.00867679	0.00782254	0.0231723	0.0386828	0.00511535	0.0724617	0.0276348	0	0
ASV471	Bacteria	Acidobacteriota	Terriglobia	0	0.0174595	0.0519509	0.0737796	0	0.0344643	0	0.0346988	0	0.0157597	0.0417735	0.0243902	0	0	0.0430196	0.0834578	0	0	0	0.059538	0	0	0.0445	0.0511347	0	0	0.0503913	0.0703107	0	0	0	0	0	0	0	0	0.0495455	0	0	0.0695169	0.0467418	0.00383651	0	0.0224533	0.0389232	0
ASV472	Bacteria	Acidobacteriota	Unclassified Acidobacteriota	0.0530694	0.0552883	0	0	0.0514403	0.042123	0.0828575	0	0.0475007	0.0400053	0	0	0	0	0	0	0	0.0488329	0	0	0.0296424	0.0578662	0.0402619	0	0.0480598	0	0	0	0	0	0	0.0391016	0	0.0394335	0.0537991	0	0	0	0.0357602	0	0	0.0434805	0	0	0	0
ASV473	Bacteria	Chloroflexota	Chloroflexia	0	0.0155195	0.0478495	0.0286084	0.0043779	0.0134028	0.02882	0.0495697	0	0.0278825	0.0398747	0.0375235	0	0.0227228	0.0553109	0.0527102	0	0.00976658	0.0563023	0.0714456	0	0	0.0508572	0.0440816	0	0	0.0629892	0.0121225	0	0	0	0	0	0	0.0228932	0	0.0290439	0	0.0134101	0.0671996	0.0483536	0	0.0376801	0.0345435	0	0
ASV474	Archaea	Methanobacteriota	Unclassified Methanobacteriota	0	0	0	0.0331255	0	0	0	0	0	0	0.00759518	0	0	0	0	0	0	0	0	0	0	0	0	0	0	0	0	0.0703107	0	0	0	0	0	0	0	0	0	0	0	0	0	0	0	0	0.0820543	0.231822
ASV475	Bacteria	Bacteroidota	Unclassified Bacteroidota	0	0.0184294	0.0205069	0.0135514	0	0	0.0126088	0.0118967	0.00791678	0	0.0199373	0.0281426	0	0.0162306	0	0	0.0143301	0.0130221	0.0281512	0	0.0148212	0.0216998	0	0.0246857	0.0137314	0.0192844	0.00944837	0.0533392	0.0176331	0	0.0224517	0	0	0	0.0377739	0	0.0290439	0	0.0178801	0.0185378	0.0128943	0.0255768	0	0.0138174	0.0315593	0.0700297
ASV476	Bacteria	Chloroflexota	Chloroflexia	0.0265347	0.0096997	0	0	0.0580072	0	0	0	0	0	0	0	0.0755726	0	0	0	0.0668737	0.027672	0	0	0.0385351	0	0	0	0.0425672	0.0374345	0	0	0.0489807	0.0851958	0.0690822	0.048302	0.0603908	0.0821531	0.0251826	0	0	0.0592914	0	0	0	0.0281344	0	0	0	0
ASV477	Bacteria	Acidobacteriota	Unclassified Acidobacteriota	0.0305149	0.0261892	0	0	0.0394011	0.0516964	0.07205	0	0.0380005	0	0	0	0	0.0973836	0	0	0	0.0439496	0	0	0.0889271	0.0409885	0	0	0.0494329	0	0	0	0	0	0	0.0264511	0.0507283	0.0345043	0.0389185	0	0	0.0144613	0.0435827	0	0	0.0434805	0.107243	0	0	0
ASV478	Bacteria	Unclassified Bacteria	Unclassified Bacteria	0.0185743	0.032009	0.0273426	0	0.0218895	0.0497817	0.0558388	0	0.0205836	0.0278825	0.0341783	0	0	0.0714147	0.0122913	0.0263551	0.0382135	0.0292997	0	0	0.0163033	0.0385775	0.0275476	0	0.0178508	0.0204188	0.0283451	0	0	0	0.0189976	0.0161007	0.0241563	0.0328612	0.0309059	0	0.0495455	0.0144613	0.0245851	0	0.022565	0.0281344	0.0318831	0	0	0
ASV479	Bacteria	Chloroflexota	Chloroflexia	0	0.0281291	0.0341782	0	0.0186061	0.0287202	0	0.0307332	0	0.0266702	0.0132916	0	0.0755726	0.0357073	0	0	0	0.0569717	0.0387079	0	0.0429814	0	0.0381429	0.0282122	0.0178508	0.0249563	0.0236209	0	0	0	0	0.0287512	0.0289876	0.0361473	0.0583778	0	0.0341693	0.0173536	0.0268201	0	0.0209532	0.0422016	0	0.0259076	0	0
ASV480	Bacteria	Planctomycetota	Unclassified Planctomycetota	0	0.095057	0	0	0	0.116796	0	0	0	0.156384	0	0	0	0	0	0	0	0.0699938	0.105567	0	0	0	0	0	0	0	0	0	0	0	0	0	0	0	0.0995856	0	0	0	0.0961055	0	0	0	0.0782586	0	0	0
ASV481	Bacteria	Pseudomonadota	Alphaproteobacteria	0	0	0.0697236	0.0828139	0	0	0	0.0733632	0	0	0.103484	0	0	0	0.0983304	0	0	0	0	0.0690641	0	0	0	0.0916897	0	0	0	0.0678862	0	0	0	0	0	0	0	0	0.0837149	0	0	0.0370757	0	0	0	0	0.0220915	0
ASV482	Bacteria	Pseudomonadota	Oligoflexia	0.0331684	0.0378288	0.0478495	0	0.0153227	0	0	0.0287504	0	0	0.0569638	0.043152	0	0	0.0512138	0	0	0	0	0.064301	0	0	0	0.0528979	0.0151045	0.0363001	0	0	0.0460419	0.0257569	0.0535387	0	0	0	0	0.0739836	0.0649218	0	0	0	0.0193414	0.0268556	0	0.0466337	0	0
ASV483	Bacteria	Chloroflexota	Chloroflexia	0	0	0.0464824	0.0406541	0	0	0	0.0783202	0	0	0.0237349	0.0694184	0	0	0.0245826	0.0658877	0	0	0	0.0238152	0	0	0	0.0546612	0	0	0.034644	0.0945558	0	0	0	0	0	0	0	0.0332926	0.0307524	0	0	0.0231723	0.0596361	0	0	0.0449066	0.050495	0.00482963
ASV484	Bacteria	Pseudomonadota	Alphaproteobacteria	0	0	0	0.0271027	0	0	0	0	0	0	0	0.0731707	0	0	0	0	0	0	0	0	0	0	0	0.0246857	0	0	0	0.121225	0	0	0	0	0	0	0	0	0	0	0	0	0.0483536	0	0	0	0.0999379	0.120741
ASV485	Bacteria	Bacteroidota	Unclassified Bacteroidota	0.0530694	0.0407387	0.00410139	0.00301141	0.0262674	0.0172321	0.0270188	0.000991395	0.022167	0.0145474	0.00474699	0.0187617	0.139519	0	0.0081942	0	0.0429902	0.0146499	0	0.00476304	0.0207497	0.0289331	0.00211905	0.00705306	0.0123582	0.0283595	0.00314946	0.00363676	0.0244904	0.0416072	0.0155435	0.0448518	0.0338189	0.026289	0.0194593	0	0	0.0433839	0.0111751	0.00695169	0.0161179	0.0332498	0.0608678	0.00345435	0.0094678	0
ASV486	Bacteria	Chloroflexota	Chloroflexia	0.0437823	0.0242492	0	0	0.0470624	0.0153175	0	0	0.044334	0.0157597	0	0	0.0755726	0.0454457	0	0	0.0525436	0.0309275	0	0	0.0429814	0.0241109	0	0	0.0288359	0.0374345	0	0	0.0352661	0.0475511	0.0345411	0.0414017	0.0362345	0.0377904	0.0194593	0	0	0.0506146	0.0156451	0	0	0.0319709	0	0	0	0
ASV487	Bacteria	Planctomycetota	Unclassified Planctomycetota	0	0	0.0492166	0.0496883	0	0	0	0.0624579	0	0	0.0313301	0.0487805	0	0	0	0.0834578	0	0	0	0.0357228	0	0	0	0.0211592	0	0	0	0.0642494	0	0	0	0	0	0	0	0.0295935	0.0597964	0	0	0	0.0354593	0	0	0.0466337	0.0547029	0.0579556
ASV488	Bacteria	Planctomycetota	Planctomycetia	0	0	0.0410139	0.0948595	0	0	0	0.075346	0	0	0.0284819	0.0562852	0	0	0.0696507	0.0527102	0	0	0	0.0381043	0	0	0	0.0317388	0	0	0.0566902	0.076372	0	0	0	0	0	0	0	0.110975	0.0649218	0	0	0	0.0805893	0	0	0	0.0305074	0
ASV489	Bacteria	Acidobacteriota	Terriglobia	0.0344951	0	0	0	0.0251729	0	0	0	0.0253337	0	0	0	0.0581328	0	0	0	0.0501552	0	0	0	0.0355708	0	0	0	0.0370747	0.0601221	0	0	0.130289	0.0812332	0.110532	0.0195508	0.0531439	0.0328612	0	0	0	0.0390456	0	0	0	0.0306921	0	0	0	0
ASV490	Bacteria	Planctomycetota	Unclassified Planctomycetota	0.0636833	0.0407387	0	0	0	0	0	0	0.0411672	0	0	0	0	0	0	0	0	0.0439496	0.0598212	0	0.0414993	0	0	0	0.0260896	0.0385689	0	0	0.0352661	0.0396259	0.0414493	0.0448518	0.0555596	0.0492918	0	0	0	0.033261	0.0759904	0	0	0.0562689	0	0	0	0
ASV491	Bacteria	Acidobacteriota	Unclassified Acidobacteriota	0.0331684	0.0271592	0	0	0.0317398	0.0306349	0.0378263	0	0.0190003	0.0315194	0	0	0	0.0421996	0	0	0.0382135	0.0358108	0	0	0.0385351	0.0361664	0.0339048	0	0.0357015	0.0374345	0	0	0	0.033682	0.0587199	0.0368015	0.0362345	0.0443627	0.0228932	0	0	0.0231381	0.0335252	0	0	0.0383651	0	0	0	0
ASV492	Bacteria	Verrucomicrobiota	Verrucomicrobiia	0	0.0387988	0	0	0.066763	0.0344643	0.0756525	0	0.0728344	0.0460667	0	0	0	0.0908914	0	0	0	0.0878992	0.0985291	0	0	0.101266	0.0508572	0	0	0	0	0	0	0	0	0.0322013	0	0	0.0606671	0	0	0	0.0469352	0	0	0	0	0	0	0
ASV493	Bacteria	Unclassified Bacteria	Unclassified Bacteria	0.0358218	0.0281291	0	0	0.022984	0.0344643	0	0	0.0364172	0.055765	0	0	0	0.0486918	0	0	0.0310485	0.0585995	0	0	0.0563205	0	0.0614524	0	0.0233433	0.0294938	0	0	0.0235107	0.0297194	0.0535387	0.0299012	0.0362345	0	0	0	0	0.0202458	0.0435827	0	0	0.0345286	0.0405785	0	0	0
ASV494	Bacteria	Planctomycetota	Unclassified Planctomycetota	0	0	0.0492166	0.0316198	0	0	0	0.0594837	0	0	0.0237349	0.0487805	0	0	0.040971	0	0	0	0	0.0190522	0	0	0	0.0282122	0	0	0.0299198	0.071523	0	0	0	0	0	0	0	0	0.0495455	0	0	0.0254895	0.0322357	0	0	0	0.0525989	0.0724445
ASV495	Bacteria	Planctomycetota	Planctomycetia	0	0	0	0.0301141	0	0	0	0.00892255	0	0	0.00189879	0.0393996	0	0	0.0102428	0.0219626	0	0	0	0	0	0	0	0.00881632	0	0	0	0.0678862	0	0	0	0	0	0	0	0	0.0222101	0	0	0	0.0161179	0	0	0	0.0925741	0.277704
ASV496	Bacteria	Chloroflexota	Dehalococcoidia	0	0.0358889	0	0	0.0240785	0.0746726	0	0	0	0.0715247	0.0398747	0	0	0	0	0	0	0.0748771	0.119642	0	0	0.0747438	0.103833	0	0	0	0.0551155	0	0	0	0	0	0.0821316	0	0.0457865	0	0	0	0.0569928	0	0	0	0.0637663	0	0	0
ASV497	Bacteria	Chloroflexota	Chloroflexia	0	0.0223093	0.0505838	0	0	0.0344643	0.0486338	0.0198279	0	0.0242457	0.0208867	0.0300188	0	0	0.0471167	0.0614952	0	0.0292997	0.0387079	0.0404858	0	0	0.0275476	0	0	0	0.0598397	0.0509146	0	0	0	0.0356514	0	0	0.0194593	0.040691	0.0324609	0	0.0368777	0	0	0	0	0	0.0420791	0
ASV498	Bacteria	Bacteroidota	Flavobacteriia	0	0	0	0.00903424	0	0	0	0.00396558	0	0	0	0	0	0	0	0	0	0.0292997	0	0	0	0.0168776	0	0	0	0	0	0	0	0.899509	0	0	0	0	0	0	0	0	0	0	0	0	0	0	0.0094678	0
ASV499	Bacteria	Chloroflexota	Dehalococcoidia	0.025208	0.0193994	0.0259754	0.0195742	0.022984	0	0.0180125	0.0386644	0.0174169	0.0206088	0.0189879	0	0	0.0486918	0	0.0351401	0	0.027672	0	0	0	0.0409885	0	0.0405551	0.0219702	0	0.0283451	0.0266696	0	0	0	0.0195508	0	0.0312182	0.0297612	0.129471	0.0563794	0	0.0435827	0	0.022565	0.039644	0	0	0	0
ASV500	Bacteria	Bacteroidota	Unclassified Bacteroidota	0.0530694	0.0397688	0	0	0.0350232	0.0325496	0	0	0.0522507	0.0375808	0.0284819	0	0	0.0486918	0	0.0263551	0.0382135	0.0260442	0.0316701	0.0119076	0.0489099	0.0313442	0.0296667	0	0.0247164	0.0385689	0.00787364	0	0.0440826	0.0356633	0	0	0	0	0	0	0	0	0.0335252	0.0208551	0	0.0370863	0	0	0	0
ASV501	Bacteria	Planctomycetota	Planctomycetia	0.0172476	0.0193994	0.0259754	0.0210799	0.0284564	0.0229762	0.036025	0.0356902	0	0.0218211	0.0446217	0	0	0	0.0163884	0.0307476	0.0429902	0.0211609	0.0211134	0.0476304	0	0	0.0317857	0	0.0137314	0.0249563	0.0141726	0	0	0.0297194	0	0.0310513	0.0338189	0	0.0137359	0	0.0290439	0.021692	0.0257026	0.0486618	0.0145061	0	0.0318831	0.0362707	0	0
ASV502	Bacteria	Pseudomonadota	Unclassified Pseudomonadota	0.0597031	0.0387988	0.0492166	0	0.0798967	0.0344643	0	0	0	0	0	0	0	0	0	0	0	0	0	0	0	0	0	0.0246857	0.0357015	0.0487783	0	0	0.00587769	0	0.0259058	0.0368015	0.135276	0.0640794	0	0	0	0.0477223	0.0257026	0	0	0.047317	0	0	0	0
ASV503	Bacteria	Pseudomonadota	Unclassified Pseudomonadota	0	0.0562582	0	0	0	0	0.122485	0	0	0.0848598	0.0778506	0	0	0	0	0	0	0	0	0	0.109677	0	0	0	0	0	0	0	0.0597565	0	0	0	0	0	0.0869943	0	0	0	0.0525228	0	0	0	0	0	0	0
ASV504	Bacteria	Pseudomonadota	Alphaproteobacteria	0	0	0.0218741	0	0	0	0.04323	0	0	0.0109105	0.0151904	0.0581614	0	0	0	0	0	0	0	0	0	0	0.0275476	0.026449	0	0	0.034644	0.0387921	0	0	0	0	0	0	0.0194593	0	0.0358778	0	0.00447002	0.0254895	0.0419064	0	0	0.0189989	0.110458	0.0917631
ASV505	Bacteria	Pseudomonadota	Gammaproteobacteria	0.0119406	0.0193994	0	0.0421598	0.00766133	0.0325496	0.0252175	0.0386644	0.0158336	0.0193965	0.0275325	0.0675422	0	0	0.0614565	0.0483177	0	0	0.0316701	0	0	0	0.0466191	0.0528979	0.0151045	0	0.058265	0.0327308	0	0	0	0.0115005	0.0144938	0.0131445	0.0171699	0	0	0.00723066	0.0312902	0	0.0241768	0	0	0	0	0
ASV506	Bacteria	Pseudomonadota	Alphaproteobacteria	0	0	0.0574194	0.0813082	0	0	0	0.037673	0	0	0.0636096	0.0731707	0	0	0	0	0	0	0	0.0500119	0	0	0	0.0564245	0	0	0.0850354	0.0594004	0	0	0	0	0	0	0	0	0.080298	0	0	0	0.0483536	0	0	0	0.047339	0
ASV507	Bacteria	Pseudomonadota	Gammaproteobacteria	0	0	0	0.0752853	0	0	0	0	0	0	0	0	0	0	0	0	0	0.0130221	0	0	0	0	0	0	0	0	0	0	0	0	0	0.0701528	0	0	0	0	0	0	0	0	0	0	0.663749	0.316073	0	0
ASV508	Bacteria	Pseudomonadota	Alphaproteobacteria	0	0	0	0.27705	0	0	0	0.0604751	0	0	0	0	0	0	0	0	0	0	0	0	0	0	0	0	0	0	0	0	0	0.0792519	0	0.0897036	0	0	0.010302	0	0	0	0	0	0	0	0	0	0.166213	0
ASV509	Bacteria	Chloroflexota	Chloroflexia	0	0.0300691	0.0369125	0	0	0.0459524	0.0666463	0.0456042	0	0	0	0	0	0	0	0.0922428	0	0.0716216	0	0.0785901	0	0	0	0.0387918	0	0	0	0.0339431	0	0	0	0	0.0773003	0	0.0412078	0	0.0324609	0	0.0726379	0.0671996	0.0402946	0	0.0231877	0	0	0
ASV510	Bacteria	Pseudomonadota	Alphaproteobacteria	0	0	0	0.138525	0	0	0	0.0624579	0	0	0	0.0300188	0	0	0	0.0483177	0	0.0504607	0	0.0833532	0	0	0	0	0	0	0	0	0	0.087177	0	0.0759031	0	0	0	0	0	0	0	0	0.0274004	0	0.121736	0.184808	0	0
ASV511	Bacteria	Acidobacteriota	Terriglobia	0.0490892	0.0281291	0.031444	0	0	0	0.0594413	0	0	0.0351562	0.0446217	0	0	0	0	0	0.0573203	0.0455774	0.0844535	0	0	0.0578662	0	0	0.0247164	0.0306282	0.0440924	0	0	0	0	0.0310513	0	0	0.0217486	0	0	0	0.0502878	0.0486618	0	0	0.0782586	0.0241805	0	0
ASV512	Bacteria	Planctomycetota	Phycisphaerae	0	0.0174595	0.0150384	0	0.0153227	0.0268055	0	0.0178451	0.022167	0.0121228	0.00379759	0	0.0697593	0	0	0	0	0.0179054	0.0316701	0.0285782	0.025196	0.0409885	0.0360238	0.033502	0	0.0351657	0.0283451	0.00848577	0.02547	0.033682	0.0172706	0.0287512	0.0434814	0.0607933	0.0274719	0	0	0.0202458	0.0413477	0.0324412	0.0193414	0.0191826	0	0	0	0
ASV513	Bacteria	Chloroflexota	Chloroflexia	0.0464357	0.0145495	0.0259754	0.00602283	0.0284564	0	0.0270188	0.00396558	0.026917	0.0254579	0	0.00938086	0	0	0.0696507	0.245981	0	0	0	0.0523934	0.0207497	0	0.0254286	0.0176326	0	0.0136125	0.0267704	0.00121225	0.0323273	0	0	0.0207008	0	0	0.0251826	0	0.0649218	0	0.0223501	0.0231723	0.00161179	0.0281344	0	0	0.0189356	0
ASV514	Bacteria	Verrucomicrobiota	Unclassified Verrucomicrobiota	0	0	0	0	0.0766133	0	0	0	0.0427506	0	0	0	0	0	0	0	0	0	0	0	0.10523	0	0	0	0.090627	0	0	0	0.110696	0	0.093261	0	0	0.1183	0	0	0	0.0679682	0	0	0	0	0	0	0	0
ASV515	Bacteria	Acidobacteriota	Unclassified Acidobacteriota	0	0	0.0519509	0	0	0	0.0378263	0	0	0.0266702	0.0303807	0	0	0	0.0798935	0	0	0	0	0.0952608	0	0	0.0402619	0.0634775	0	0	0.11338	0	0	0	0	0	0	0	0	0.133171	0.0649218	0	0.0279376	0.111227	0	0	0	0.0863588	0	0
ASV516	Bacteria	Unclassified Bacteria	Unclassified Bacteria	0.0278614	0	0	0	0.022984	0.0210615	0	0	0.0237503	0	0.0246843	0	0.0174398	0	0	0.0131775	0.0238834	0.0292997	0.0422268	0.0119076	0.0163033	0	0	0	0.0329553	0.0181501	0	0	0.0509399	0.033682	0.0189976	0.025301	0.0314032	0.0230029	0	0.081382	0.0358778	0.0318149	0.0391127	0.0278067	0.0419064	0.0294133	0.0231877	0.029362	0	0
ASV517	Bacteria	Planctomycetota	Unclassified Planctomycetota	0.0663368	0	0	0	0.0612906	0	0	0	0.0538341	0	0	0	0.0581328	0	0	0	0	0	0	0	0.0563205	0	0	0	0.0521792	0.0521814	0	0	0.0372253	0	0.031087	0.0425517	0.0483127	0.0427196	0	0	0	0.0578453	0	0	0	0.0703361	0	0	0	0
ASV518	Bacteria	Bacteroidota	Sphingobacteriia	0	0.00193994	0	0.0120457	0	0	0	0.00396558	0	0	0	0.011257	0	0	0	0	0	0	0	0	0	0	0	0	0	0	0	0.0727352	0	0	0	0	0	0	0	0	0.00683387	0	0	0.0115861	0.0128943	0	0	0	0.0767944	0.166622
ASV519	Bacteria	Pseudomonadota	Deltaproteobacteria	0.0145941	0.0164895	0.0205069	0.0346313	0.00766133	0	0.0324225	0.0208193	0.0205836	0.0303071	0.0151904	0.0393996	0	0	0.0245826	0.0263551	0.0382135	0.0195332	0	0.0214337	0	0.0385775	0.0211905	0.0176326	0.0192239	0.0147469	0.0220462	0.0266696	0	0	0	0.0126505	0.0217407	0.0147876	0.0240379	0	0.025627	0.0130152	0.0201151	0	0.0177296	0.0127884	0	0.0276348	0.0136757	0.0193185
ASV520	Bacteria	Unclassified Bacteria	Unclassified Bacteria	0	0	0.0410139	0.0391484	0	0.0268055	0.0270188	0.0723718	0	0.0266702	0.0541156	0.0225141	0	0	0.0512138	0	0	0.00976658	0.0211134	0.0285782	0	0.0216998	0.0275476	0.0211592	0	0	0.0409429	0	0	0	0	0	0	0	0.0206039	0	0.0785895	0	0.0134101	0.0532963	0.0306239	0	0.0173908	0.0310892	0	0
ASV521	Bacteria	Chloroflexota	Dehalococcoidia	0	0	0.031444	0.0632397	0	0.0402083	0.036025	0.0475869	0	0.0206088	0.0332289	0	0	0.0227228	0.0512138	0.0483177	0	0.027672	0.0492646	0.0500119	0	0	0.0169524	0.0564245	0	0	0	0.0303063	0	0	0	0	0	0	0.0206039	0.0702845	0.0392947	0	0.0134101	0.0393929	0.0499653	0	0	0.0224533	0	0
ASV522	Archaea	Unclassified Archaea	Unclassified Archaea	0	0	0	0	0	0	0	0	0	0	0	0.0487805	0	0	0	0	0	0	0	0	0	0	0	0	0	0.032897	0	0.0521269	0	0	0	0	0	0	0	0	0	0	0	0	0	0	0	0	0.049443	0.188356
ASV523	Bacteria	Pseudomonadota	Gammaproteobacteria	0	0.0708078	0	0	0	0	0	0	0	0	0	0	0	0	0	0	0	0	0	0	0	0	0.00847619	0	0	0	0	0	0	0	0	0	0	0	0	0	0	0	0	0	0	0.534554	0	0	0	0
ASV524	Bacteria	Unclassified Bacteria	Unclassified Bacteria	0	0.0387988	0.0218741	0	0.0415901	0.0497817	0.0486338	0	0.0538341	0.0387931	0	0	0.127892	0.0746608	0	0	0	0.0472051	0.0457457	0	0	0.0626884	0.0508572	0	0.0384478	0	0	0	0	0	0	0	0	0	0.0309059	0	0	0	0.0447002	0	0	0.039644	0.0521724	0	0	0
ASV525	Bacteria	Chloroflexota	Chloroflexia	0	0.0164895	0.0218741	0.0195742	0	0.0382936	0.0252175	0.037673	0	0.016972	0.0227855	0.0525328	0	0.0227228	0.0614565	0.0571027	0	0.0162776	0.0211134	0.0309598	0	0.0289331	0.0317857	0.0352653	0	0	0.034644	0.0109103	0	0	0	0.0207008	0	0	0.0217486	0	0.0222101	0	0.0178801	0.0278067	0.0483536	0	0.0289847	0.0535424	0	0
ASV526	Bacteria	Pseudomonadota	Gammaproteobacteria	0.0305149	0.0378288	0	0	0.0492514	0	0.0198138	0	0.0285004	0	0	0	0.0406929	0	0	0	0.0477669	0	0	0	0.0296424	0	0.0339048	0	0.0288359	0.051047	0	0	0.0352661	0.0455698	0.02936	0.0299012	0.0362345	0.0443627	0.0206039	0	0	0.033261	0.00894005	0	0	0.0409228	0	0	0	0
ASV527	Bacteria	Planctomycetota	Unclassified Planctomycetota	0.0265347	0.0193994	0.0300768	0	0	0.0593551	0	0	0.0205836	0.0254579	0.0436723	0	0	0.0162306	0	0	0.0310485	0.0325553	0.0457457	0	0.0266781	0.0337553	0.0339048	0	0.0164776	0.0306282	0.0204715	0	0.0137146	0.0257569	0.0120894	0.0264511	0	0.0197167	0.0309059	0	0	0.021692	0.0301727	0	0	0.0191826	0.0347816	0	0	0
ASV528	Bacteria	Pseudomonadota	Alphaproteobacteria	0	0.0300691	0.00683564	0	0.0153227	0.0325496	0.0450313	0	0.0190003	0.0193965	0.0104434	0	0	0	0	0	0	0.0439496	0	0	0.0237139	0	0.0296667	0.0493714	0.0425672	0	0.0267704	0.0278818	0.0117554	0.0118878	0	0.024151	0	0	0.0412078	0	0.0358778	0.0130152	0.0458177	0	0	0	0	0.0172718	0.0220915	0
ASV529	Bacteria	Pseudomonadota	Deltaproteobacteria	0.0636833	0	0	0	0	0	0	0	0.0459173	0	0	0	0.0697593	0	0	0	0.0644853	0	0.0422268	0	0.0414993	0	0	0	0.0439404	0.0453751	0	0	0.0509399	0	0.0587199	0.0540522	0.0603908	0.0460057	0	0	0	0.0491685	0	0	0	0.0498747	0	0	0	0
ASV530	Bacteria	Bacteroidota	Unclassified Bacteroidota	0.0318416	0.032009	0	0	0.0350232	0.0497817	0	0	0.026917	0	0.0113928	0	0	0.0454457	0	0	0.0334368	0.0195332	0	0	0	0.0216998	0	0	0	0.0226876	0	0	0.0225311	0.0237756	0.0449035	0.0161007	0.0314032	0.0295751	0.0263272	0	0	0.0202458	0.0145276	0	0	0.0345286	0.0231877	0	0	0.0676149
ASV531	Bacteria	Pseudomonadota	Alphaproteobacteria	0	0.0397688	0	0	0	0	0	0	0	0	0.0484193	0	0	0	0.0512138	0	0	0.0537162	0	0	0.050392	0	0	0	0	0.0476439	0	0.0424289	0	0	0	0.0287512	0	0.0657225	0	0	0.051254	0.0433839	0.0301727	0	0	0	0	0	0.0262995	0
ASV532	Bacteria	Unclassified Bacteria	Unclassified Bacteria	0	0.0436486	0.0396467	0	0.0164171	0.0382936	0.02882	0	0.00791678	0.0424299	0.0199373	0	0	0.0454457	0	0	0	0.027672	0.0492646	0.0238152	0.0237139	0	0	0	0.0164776	0	0.0614144	0	0	0	0	0.0115005	0	0	0.0423525	0	0	0.00723066	0.0402302	0.0532963	0.022565	0.00895186	0.0405785	0.0500881	0	0
ASV533	Bacteria	Planctomycetota	Planctomycetia	0.124713	0.0203694	0	0	0	0	0	0	0	0	0	0	0	0	0	0	0	0	0	0	0.12598	0	0	0	0.0823882	0	0	0	0.0734711	0	0.0880799	0	0.103872	0	0	0	0	0.076645	0	0	0	0	0	0	0	0
ASV534	Bacteria	Pseudomonadota	Deltaproteobacteria	0.0464357	0	0	0.0587226	0	0	0	0.00594837	0	0	0	0	0	0	0	0	0	0.0162776	0	0	0	0.0192887	0	0	0	0	0	0	0	0.497305	0	0.0379515	0	0	0	0	0	0	0	0	0	0	0.0985479	0.107085	0	0
ASV535	Bacteria	Acidobacteriota	Vicinamibacteria	0	0	0.0642551	0.0481826	0	0	0	0.0594837	0	0	0.0408241	0.0600375	0	0	0.0757964	0	0	0	0.0387079	0.0381043	0	0	0	0.0546612	0	0	0.0629892	0.0533392	0	0	0	0	0	0	0	0	0.0615048	0	0	0	0.0290121	0	0	0.0535424	0	0
ASV536	Bacteria	Unclassified Bacteria	Unclassified Bacteria	0.0424555	0	0	0.0572169	0	0	0	0.0505611	0	0	0.0398747	0.0562852	0	0	0	0.0746728	0	0	0	0.0357228	0	0	0	0.0405551	0	0	0.0409429	0.0169715	0	0	0	0	0	0	0	0.0221951	0.0375863	0	0	0.0440273	0.0773657	0	0	0.0362707	0.0241955	0.0362223
ASV537	Bacteria	Unclassified Bacteria	Unclassified Bacteria	0	0	0	0.0542054	0	0	0	0.0267677	0	0	0	0.0600375	0	0	0	0	0	0	0	0	0	0	0	0	0	0	0.0456671	0.0594004	0	0	0	0	0	0	0	0	0.0632133	0	0	0	0.0386828	0	0	0.0310892	0.0599628	0.0869334
ASV538	Bacteria	Pseudomonadota	Deltaproteobacteria	0.0477625	0	0	0	0.0503459	0	0	0	0.0665009	0	0	0	0.0639461	0	0	0	0.0668737	0.0195332	0	0	0.0400172	0	0	0	0.030209	0.0363001	0	0	0.0313477	0	0.0259058	0.0517521	0.0555596	0.0607933	0.0343399	0	0	0.0144613	0	0	0	0.0268556	0	0	0	0
ASV539	Bacteria	Chloroflexota	Chloroflexia	0.0265347	0	0.010937	0.00150571	0.020795	0.0248909	0.01441	0.0109053	0.0316671	0.0133351	0.00189879	0.00938086	0	0	0.0040971	0.0175701	0.0979221	0.0130221	0.0844535	0.00714456	0	0	0.00635714	0.00352653	0	0.0669283	0.0204715	0.00606127	0.0411438	0.0653828	0.0345411	0.0138006	0	0.0147876	0.0160253	0.00739836	0.0153762	0.00433839	0.00223501	0	0.00483536	0.0204614	0	0.0069087	0.00420791	0
ASV540	Bacteria	Planctomycetota	Unclassified Planctomycetota	0	0	0.0505838	0.0225856	0	0	0	0.037673	0	0	0.0825976	0	0	0	0.0798935	0.0878503	0	0	0	0.0762086	0	0	0.0466191	0.0476081	0	0	0.0771617	0	0	0	0	0	0	0	0	0	0.0563794	0	0	0.0532963	0.0322357	0	0	0.0414522	0	0
ASV541	Bacteria	Chloroflexota	Chloroflexia	0	0	0	0	0	0	0	0	0	0	0.0531662	0	0	0	0	0	0	0	0	0	0	0	0.0593333	0	0	0	0	0.0690984	0	0	0	0	0	0	0.0274719	0	0	0	0.0346427	0	0	0	0	0	0.0715345	0.178696
ASV542	Archaea	Thermoproteota	Unclassified Thermoproteota	0	0	0.131244	0	0.0689519	0	0	0	0	0.115167	0.0655084	0	0	0	0	0	0	0	0	0.0738271	0	0	0	0	0	0	0	0	0	0	0	0	0	0	0	0	0	0	0	0	0	0.0370863	0	0	0	0
ASV543	Bacteria	Pseudomonadota	Alphaproteobacteria	0.108792	0	0	0	0.0591017	0	0	0	0.0680843	0	0	0	0	0	0	0	0.10031	0	0	0	0.112641	0	0	0	0	0.0669283	0	0	0.0480011	0	0	0	0	0.0952976	0	0	0	0	0	0	0	0	0	0	0	0
ASV544	Bacteria	Unclassified Bacteria	Unclassified Bacteria	0.0424555	0.0174595	0	0	0.0251729	0	0	0	0.049084	0.0266702	0	0	0.0406929	0	0	0	0.0477669	0.027672	0	0	0.0385351	0	0	0	0.0329553	0.0408376	0	0	0.0284088	0.0158504	0.0189976	0.0299012	0.0314032	0.0558641	0.0251826	0	0	0.0274765	0	0	0	0.0332498	0.0521724	0	0	0
ASV545	Bacteria	Chloroflexota	Chloroflexia	0	0	0.0751921	0.0572169	0	0	0	0.0416386	0	0	0.0417735	0.0450281	0	0	0.0716993	0.0527102	0	0	0	0.0571565	0	0	0	0.0476081	0	0	0	0.0278818	0	0	0	0	0	0	0	0	0.0358778	0	0	0.0648824	0.0354593	0	0	0.0604511	0.0294554	0
ASV546	Bacteria	Planctomycetota	Planctomycetia	0	0.0193994	0	0	0.0634796	0.0229762	0.021615	0	0.0459173	0	0	0	0.0406929	0	0	0	0.0573203	0.0244164	0	0	0.0385351	0.0313442	0	0	0.0260896	0.0363001	0	0	0.0617157	0.0832145	0.0259058	0.0264511	0	0	0.0228932	0	0	0.0390456	0	0	0	0	0	0	0	0
ASV547	Bacteria	Unclassified Bacteria	Unclassified Bacteria	0	0	0	0.0451712	0	0	0	0	0	0	0.0313301	0	0	0	0.0716993	0.0702802	0	0	0	0	0	0	0.0614524	0	0	0	0	0.0897068	0	0	0	0	0	0	0	0	0.0222101	0	0	0	0	0	0	0	0.0652227	0.0990075
ASV548	Bacteria	Acidobacteriota	Terriglobia	0.0597031	0	0	0	0.0284564	0	0	0	0.026917	0	0	0	0.0523195	0.0616763	0	0	0	0	0	0	0.0355708	0	0	0	0.0357015	0.0306282	0	0	0.0362457	0.0217943	0.0552658	0.0586524	0.0314032	0.0230029	0.0206039	0	0	0.0231381	0.0268201	0	0	0.0601054	0	0	0	0
ASV549	Bacteria	Nitrospinota	Nitrospinia	0.0212278	0.0116396	0.010937	0	0.0306453	0.0172321	0.0270188	0	0.0316671	0.0303071	0.00474699	0	0	0	0.0204855	0	0.0334368	0.0130221	0	0	0.0429814	0.0241109	0	0	0.0233433	0.0260907	0	0	0.0342865	0.0217943	0.02936	0.024151	0.0314032	0.0410765	0.00686797	0	0	0.0361533	0.0145276	0	0	0.0306921	0.0289847	0	0	0
ASV550	Bacteria	Unclassified Bacteria	Unclassified Bacteria	0.0185743	0.0096997	0.0136713	0.0195742	0.020795	0	0.007205	0.0267677	0.0142502	0.0109105	0.0113928	0.0243902	0	0.025969	0.0307283	0.0351401	0	0.0179054	0	0	0.0222318	0	0.0254286	0.0246857	0.0151045	0.0124782	0.0251957	0.0363676	0.0117554	0.0297194	0.0155435	0.0103504	0	0.00985837	0.0217486	0	0.0290439	0	0.0189976	0	0.0257886	0.0127884	0	0.0207261	0.0136757	0
ASV551	Bacteria	Pseudomonadota	Gammaproteobacteria	0.0291882	0	0	0	0.0328343	0	0	0	0.0427506	0	0	0	0	0	0	0	0	0	0	0	0.0518741	0	0	0	0.0315821	0.0363001	0	0	0.0871857	0.0713267	0.0656281	0.0356514	0.072469	0.027932	0	0	0	0.0187997	0	0	0	0.0281344	0	0	0	0
ASV552	Bacteria	Chloroflexota	Dehalococcoidia	0	0	0.0328111	0.0195742	0	0	0.021615	0.0346988	0	0.0121228	0	0.0225141	0	0	0.0327768	0.0966353	0	0	0	0.0571565	0	0	0.0317857	0.0176326	0	0	0.0503913	0.0375799	0	0	0	0.0138006	0	0	0.0297612	0.0850812	0.0410032	0	0	0.0532963	0.0257886	0.0230191	0.0405785	0.0241805	0.0199876	0
ASV553	Archaea	Methanobacteriota	Unclassified Methanobacteriota	0.0265347	0	0.0341782	0	0.043779	0	0	0	0.0554175	0.0509159	0	0	0.0232531	0	0	0	0	0	0.0387079	0.0309598	0.0563205	0.053044	0	0	0.0315821	0	0	0	0.0205719	0	0.0345411	0	0	0	0.0469312	0	0	0.0404917	0.0234676	0.030124	0	0.0345286	0	0	0	0
ASV554	Bacteria	Pseudomonadota	Gammaproteobacteria	0.0344951	0.0300691	0	0	0.0262674	0.047867	0.0558388	0	0	0.0254579	0.0227855	0	0	0.0616763	0	0	0	0	0	0	0	0.0602773	0.0445	0.0211592	0.030209	0	0	0	0	0	0	0.0322013	0.0362345	0.0295751	0.0343399	0	0.0136677	0	0.0379952	0.030124	0	0.0204614	0	0	0	0
ASV555	Bacteria	Acidobacteriota	Unclassified Acidobacteriota	0.0172476	0.0164895	0	0	0.0164171	0.0210615	0.0306213	0	0.0158336	0.0181842	0	0	0.0697593	0.025969	0	0	0.0429902	0.0488329	0	0	0.0385351	0.0192887	0	0	0.0219702	0.0294938	0	0	0.0235107	0	0.0328141	0.0310513	0.0700534	0.052578	0.0137359	0	0	0.0144613	0.0234676	0	0	0.0204614	0.0318831	0	0	0
ASV556	Bacteria	Unclassified Bacteria	Unclassified Bacteria	0	0.00775976	0.0095699	0.0286084	0	0	0.00900625	0.0188365	0	0.0157597	0.0303807	0.0375235	0	0.00973836	0.0245826	0	0.00477669	0.00651105	0	0	0	0.0144665	0	0.0299755	0.00411941	0	0.0488166	0.0315186	0	0	0	0	0	0.00657225	0.0251826	0.0776828	0.0375863	0	0.0134101	0.0393929	0.0789775	0	0	0.0362707	0.0199876	0.00965927
ASV557	Bacteria	Pseudomonadota	Alphaproteobacteria	0.0344951	0.0290991	0	0	0.0284564	0	0	0.0208193	0.022167	0.0278825	0	0	0	0.0389535	0	0	0.0477669	0.0455774	0	0	0.0414993	0.0578662	0	0	0.0466866	0.0204188	0	0	0.00783691	0.0178317	0	0.0299012	0	0.0410765	0.0286166	0	0	0	0.0335252	0	0	0	0.0405785	0	0	0
ASV558	Bacteria	Chloroflexota	Chloroflexia	0	0	0	0	0	0	0	0.0594837	0	0	0.0446217	0	0	0	0	0.101028	0	0	0	0	0	0	0	0.0617142	0	0	0	0.071523	0	0	0	0	0	0	0	0	0.0700472	0	0	0	0.0773657	0	0	0	0.0410272	0.0507112
ASV559	Bacteria	Actinomycetota	Unclassified Actinomycetota	0.0159208	0.0096997	0.00683564	0.0225856	0.0087558	0.0287202	0.04323	0.00495697	0.0253337	0.00969826	0.000949397	0	0	0.00649224	0.0102428	0	0.0453786	0.0179054	0.0387079	0.0476304	0.00741059	0.0867993	0.0275476	0.0317388	0.00823882	0	0.0220462	0	0	0.0416072	0	0.025301	0	0.0657225	0.0194593	0.0517886	0.0051254	0.00578453	0.0145276	0.00695169	0.0241768	0.00767303	0	0.00172718	0	0
ASV560	Bacteria	Chloroflexota	Chloroflexia	0	0	0.0287097	0.0632397	0	0	0	0.0198279	0	0.0157597	0.0246843	0.0450281	0	0	0.0471167	0	0	0	0	0	0	0	0	0.0405551	0	0	0.0314946	0.0533392	0	0	0	0	0	0	0	0	0.0307524	0	0	0.0486618	0.0612478	0	0	0.0276348	0.0578588	0.0241482
ASV561	Bacteria	Chloroflexota	Chloroflexia	0	0.0252192	0	0	0.0240785	0	0.0612425	0	0	0	0.0579132	0	0	0.107122	0	0	0	0	0	0.0309598	0	0	0	0	0	0	0.0425177	0	0	0	0	0.0184007	0	0	0.0709691	0	0.0666302	0	0.0301727	0.0602479	0	0.0434805	0.043477	0	0	0
ASV562	Bacteria	Pseudomonadota	Alphaproteobacteria	0	0	0	0.0496883	0	0	0	0	0	0	0.181335	0	0	0.0908914	0	0	0	0	0	0	0	0	0	0	0	0	0	0	0	0.0495324	0	0	0	0	0	0	0	0	0.0111751	0.081103	0	0	0	0.191716	0	0
ASV563	Bacteria	Chloroflexota	Chloroflexia	0	0.0242492	0.0328111	0	0.0383066	0.0287202	0.0396275	0	0.0411672	0.0303071	0.0275325	0	0	0	0	0	0	0.0244164	0.035189	0.0500119	0	0	0.042381	0	0	0	0.0267704	0	0	0	0	0	0.0555596	0	0.0434972	0	0	0	0.0178801	0.0347584	0	0.0447593	0.0579693	0	0	0
ASV564	Bacteria	Pseudomonadota	Deltaproteobacteria	0	0	0.0382796	0.0316198	0	0	0	0.0535353	0	0	0.0370265	0	0	0	0.0880877	0	0	0	0	0.0785901	0	0	0	0.0476081	0	0	0.0488166	0	0	0	0	0	0	0	0	0	0.1008	0	0	0.0764685	0.0499653	0	0	0.0535424	0	0
ASV565	Bacteria	Gemmatimonadota	Gemmatimonadia	0	0	0	0	0	0	0	0	0	0	0	0	0	0	0	0	0	0	0	0	0	0	0	0	0	0.0680627	0	0	0.237067	0.103027	0.127802	0	0	0	0	0	0	0	0	0	0	0	0	0	0	0
ASV566	Bacteria	Pseudomonadota	Alphaproteobacteria	0	0	0	0	0	0	0	0	0.0475007	0.0327316	0.00664578	0.0600375	0	0	0	0	0	0.0862714	0	0	0	0.0578662	0	0	0	0	0.0881848	0	0	0	0	0	0	0	0.0389185	0	0	0.0274765	0.0279376	0	0.0789775	0	0.202893	0	0	0
ASV567	Bacteria	Chloroflexota	Chloroflexia	0	0	0	0.0180685	0	0	0	0.0247849	0	0	0	0.0469043	0	0	0.0204855	0	0	0	0	0	0	0	0	0	0	0	0.0110231	0.0618249	0	0	0	0	0	0	0	0	0.0170847	0	0	0	0.0274004	0	0	0	0.0841583	0.120741
ASV568	Bacteria	Pseudomonadota	Gammaproteobacteria	0	0.0242492	0.0205069	0	0.0120392	0.0631845	0.0342238	0	0	0	0	0	0	0.00973836	0	0	0.0334368	0.0309275	0	0	0.0177854	0	0.0339048	0.0123428	0	0	0.017322	0.0521269	0.0235107	0	0	0.0103504	0	0	0.0160253	0	0.0119593	0.0159074	0.0491703	0	0	0	0	0	0.0210396	0.0724445
ASV569	Bacteria	Chloroflexota	Chloroflexia	0	0.0106697	0.0355453	0.0180685	0	0.0287202	0	0.0198279	0.0348338	0.016972	0.0332289	0.0337711	0	0.0551841	0	0	0	0.0406941	0	0	0.0281602	0.0289331	0	0.0176326	0.00961195	0	0.0299198	0.0242451	0	0	0	0	0	0	0.0263272	0	0.0102508	0	0.0223501	0	0.0322357	0	0	0	0.0210396	0.0120741
ASV570	Bacteria	Unclassified Bacteria	Unclassified Bacteria	0	0	0.0492166	0.0526997	0	0	0	0.0555181	0	0	0	0.0750469	0	0	0	0.0834578	0	0	0	0	0	0	0	0	0	0	0	0.0387921	0	0	0	0	0	0	0	0	0	0	0	0.0602479	0.0564125	0	0	0	0.0746905	0.0386371
ASV571	Bacteria	Acidobacteriota	Unclassified Acidobacteriota	0.0132674	0.0271592	0.0136713	0	0.0218895	0.0574405	0.0666463	0	0	0.0606141	0.0132916	0	0	0.0649224	0.018437	0	0	0.0325553	0.0844535	0	0	0.026522	0.0317857	0	0	0	0.0141726	0	0	0	0	0	0	0.0246459	0.0503651	0	0	0	0.0379952	0.0185378	0	0	0	0.0259076	0	0
ASV572	Bacteria	Acidobacteriota	Unclassified Acidobacteriota	0	0	0	0.0662511	0	0	0	0	0	0	0	0	0	0	0	0	0	0	0	0	0	0	0	0	0	0	0	0.0884945	0	0	0	0	0	0	0	0	0	0	0	0	0	0	0	0	0.112562	0.159378
ASV573	Bacteria	Chloroflexota	Chloroflexia	0.0278614	0.0174595	0	0	0.0197006	0	0	0	0.0364172	0	0	0	0.0232531	0	0	0	0.0358252	0.0162776	0.0422268	0	0.0770701	0	0	0	0.0315821	0.0374345	0	0	0.0235107	0.019813	0.0224517	0.0356514	0.0338189	0.0460057	0	0	0	0.033261	0.0257026	0	0	0.0281344	0	0	0	0
ASV574	Bacteria	Unclassified Bacteria	Unclassified Bacteria	0.0145941	0	0.042381	0	0	0	0	0.0218107	0	0	0.0379759	0	0	0	0.059408	0.0702802	0	0	0.035189	0.0381043	0	0.0385775	0.0508572	0.0423183	0	0	0.0425177	0	0	0	0	0	0	0	0.0366292	0.0332926	0.0273355	0	0.0268201	0.0602479	0.0370711	0	0	0.0362707	0	0
ASV575	Bacteria	Pseudomonadota	Alphaproteobacteria	0	0.00290991	0	0.0301141	0	0.137857	0	0.0287504	0	0	0.0294313	0	0	0	0.0962819	0	0	0	0	0	0	0	0	0.0370285	0	0	0.0566902	0	0	0	0	0.00920037	0	0	0.010302	0	0	0	0.00558753	0	0	0	0.15072	0.098449	0.0157797	0
ASV576	Bacteria	Chloroflexota	Dehalococcoidia	0	0	0	0	0	0	0.093665	0	0	0	0.106332	0	0	0.178537	0	0	0	0	0	0	0	0	0.139857	0	0	0	0.103932	0	0	0	0	0	0	0	0	0	0.109342	0	0	0	0	0	0	0	0	0
ASV577	Bacteria	Unclassified Bacteria	Unclassified Bacteria	0.00530694	0.0203694	0	0	0.00985028	0	0.01441	0	0.0158336	0.0206088	0.0227855	0	0.0348797	0.0421996	0.0389225	0	0.0286601	0	0	0	0.0163033	0	0	0	0.0178508	0.00567189	0.0330693	0	0	0.0118878	0.00863528	0.00460019	0.0555596	0.0164306	0.0309059	0	0.0632133	0.0202458	0.0189976	0.0440273	0	0.0179037	0.0492739	0.0466337	0	0
ASV578	Bacteria	Chloroflexota	Chloroflexia	0	0.0300691	0.0246083	0	0.0142282	0.0689285	0.0396275	0	0	0.0569773	0.0379759	0	0	0.0421996	0	0	0	0.0358108	0.035189	0	0	0.0723327	0.0529762	0	0	0	0.0141726	0	0	0	0	0.0115005	0	0	0.0354845	0	0	0	0.0368777	0	0	0	0.043477	0.0138174	0	0
ASV579	Bacteria	Unclassified Bacteria	Unclassified Bacteria	0	0	0	0.0572169	0	0	0	0.0446128	0	0	0	0	0	0	0	0	0	0	0	0	0	0	0	0	0	0	0	0	0	0	0	0	0	0	0	0	0.0580879	0	0	0	0	0	0	0.0915403	0.0652227	0.108667
ASV580	Bacteria	Acidobacteriota	Terriglobia	0	0	0.053318	0.0286084	0	0	0	0.0287504	0	0	0.0189879	0.0469043	0	0	0.0348254	0	0	0	0	0	0	0	0.0211905	0.0652408	0	0	0.0488166	0.0497024	0	0	0	0	0	0	0	0.0776828	0.0444201	0	0	0.0463446	0.0354593	0	0	0.0328163	0.0389232	0
ASV581	Bacteria	Chloroflexota	Chloroflexia	0.0477625	0.00678979	0	0	0.0328343	0	0	0	0.044334	0	0	0	0.0348797	0	0	0	0.0477669	0.0195332	0	0	0.0518741	0	0	0	0.0233433	0.0408376	0	0	0.0225311	0.0317007	0.031087	0.025301	0.0628065	0.0394335	0	0	0	0.0448301	0	0	0	0.0319709	0	0	0	0
ASV582	Bacteria	Chloroflexota	Chloroflexia	0	0.0174595	0.0259754	0.0572169	0	0	0	0.037673	0	0	0.0265831	0	0	0	0.0348254	0	0	0	0	0.0428673	0	0	0.0360238	0.0493714	0	0	0.0330693	0	0	0	0	0	0	0	0	0	0.0820064	0	0	0.0486618	0.0725303	0	0	0.0656327	0.0178836	0
ASV583	Bacteria	Pseudomonadota	Alphaproteobacteria	0	0	0.0697236	0.0466769	0	0	0	0.0614665	0	0	0.0569638	0.0487805	0	0	0	0	0	0	0	0	0	0	0	0.0775836	0	0	0	0	0	0	0	0	0	0	0	0	0.080298	0	0	0.0950064	0	0	0	0	0.049443	0
ASV584	Bacteria	Unclassified Bacteria	Unclassified Bacteria	0	0	0.0464824	0.0240913	0	0.0268055	0	0.0198279	0	0.0254579	0.0237349	0.0600375	0	0	0.0327768	0.0307476	0	0	0	0	0	0	0.0360238	0.0211592	0	0	0.017322	0.0351554	0	0	0	0	0	0	0	0.0554877	0	0	0	0.0324412	0.0193414	0	0	0.0224533	0.048391	0.0386371
ASV585	Bacteria	Pseudomonadota	Unclassified Pseudomonadota	0.0530694	0.0213393	0	0	0.0284564	0	0	0	0.0459173	0.00969826	0	0	0	0	0	0	0	0	0	0	0.0533563	0	0	0	0.0384478	0.032897	0	0	0.0401642	0.0376446	0.0431764	0.0230009	0.0603908	0.026289	0	0	0	0.0173536	0	0	0	0.0383651	0	0	0	0
ASV586	Bacteria	Pseudomonadota	Unclassified Pseudomonadota	0	0.0552883	0	0	0	0.0612698	0	0	0.0728344	0	0.0436723	0	0	0	0	0	0.0716503	0	0	0	0	0.118143	0.089	0.0722938	0	0	0	0	0	0	0	0	0	0	0	0	0	0	0	0	0	0.0332498	0.107243	0	0	0
ASV587	Bacteria	Chloroflexota	Dehalococcoidia	0.0265347	0.0193994	0.0205069	0	0.0218895	0.0191468	0	0.0148709	0.0285004	0.0315194	0.0275325	0	0	0	0.0368739	0	0.0238834	0.0358108	0	0	0	0.0337553	0.0190714	0.026449	0.0233433	0	0.0251957	0	0	0	0	0.0172507	0	0	0.0412078	0	0.0170847	0	0.0167626	0.0556135	0.0177296	0	0	0	0	0
ASV588	Bacteria	Chloroflexota	Chloroflexia	0	0	0.0273426	0.0421598	0	0.0382936	0.02882	0.0287504	0	0.0133351	0.0237349	0.0281426	0	0	0.0368739	0	0	0	0.0527834	0.0285782	0	0	0.0402619	0.0176326	0	0	0.0330693	0.0290941	0	0	0	0	0	0	0.0217486	0.0554877	0.0136677	0	0.0290551	0.0463446	0.0257886	0	0	0	0.0178836	0
ASV589	Bacteria	Chloroflexota	Chloroflexia	0	0	0	0.0421598	0	0	0	0.0346988	0	0	0	0.0731707	0	0	0	0	0	0	0	0	0	0	0	0.0317388	0	0	0	0.0484901	0	0	0	0	0	0	0	0	0	0	0	0.0532963	0	0	0	0	0.0599628	0.118326
ASV590	Bacteria	Unclassified Bacteria	Unclassified Bacteria	0	0	0.0218741	0.0331255	0.0087558	0.0325496	0.0234163	0	0	0.0218211	0.0379759	0	0	0.0227228	0.0696507	0	0	0.0113943	0.0563023	0.0285782	0	0.0216998	0.0190714	0.033502	0	0	0.0299198	0	0	0	0	0	0	0.00657225	0.0183146	0	0.0358778	0	0.0290551	0.0347584	0.0257886	0	0.0376801	0.0431794	0	0
ASV591	Bacteria	Bacteroidota	Unclassified Bacteroidota	0.0716437	0	0	0	0	0	0	0	0.0617509	0	0	0	0	0	0	0	0	0	0	0	0	0	0	0	0.0562986	0	0	0	0.0862061	0	0	0.0322013	0	0.052578	0.0240379	0.118374	0	0.0896602	0	0	0	0	0	0	0	0
ASV592	Bacteria	Chloroflexota	Chloroflexia	0.0291882	0.0164895	0.0205069	0	0.0284564	0	0	0.0287504	0.0300838	0	0.0275325	0	0	0	0.0286797	0	0	0.0260442	0	0.0357228	0.0207497	0.0216998	0	0.0193959	0.020597	0.0272251	0	0	0	0	0	0	0.0289876	0.0328612	0.0125913	0	0.0290439	0.0245842	0.0134101	0.0278067	0.0338475	0	0	0	0	0
ASV593	Bacteria	Chloroflexota	Dehalococcoidia	0	0	0.0191398	0.0225856	0	0.0114881	0	0.0118967	0.0205836	0.0206088	0.0104434	0	0	0	0	0	0	0	0.0316701	0.0571565	0	0	0	0.0564245	0	0.0124782	0.034644	0.0315186	0	0.0277382	0	0	0	0.026289	0.0297612	0	0.0307524	0.0144613	0	0.0486618	0.0435182	0	0	0	0.0231435	0.0241482
ASV594	Bacteria	Planctomycetota	Unclassified Planctomycetota	0.0225545	0.0203694	0.0382796	0	0.0153227	0.0153175	0	0	0.0158336	0	0.0161398	0.0487805	0	0	0.040971	0	0	0	0	0	0.0103748	0	0	0.0176326	0.0164776	0.0102094	0	0.0424289	0	0	0	0	0	0	0	0	0.0324609	0	0.0178801	0	0.0274004	0.00895186	0	0	0.0378712	0
ASV595	Bacteria	Acidobacteriota	Unclassified Acidobacteriota	0	0.0290991	0.0123042	0.0150571	0	0.0248909	0	0.00892255	0	0.0242457	0.0180385	0	0	0.0324612	0.0204855	0	0	0.0260442	0.0598212	0.0214337	0	0.0144665	0.0296667	0.0105796	0.0219702	0	0.017322	0.0193961	0	0	0	0.024151	0.0241563	0.0328612	0.0183146	0.0591869	0.0205016	0	0.0178801	0.0231723	0.0112825	0.0191826	0	0	0.0115718	0
ASV596	Bacteria	Pseudomonadota	Gammaproteobacteria	0	0	0	0	0	0	0	0.0158623	0	0	0	0.0262664	0	0	0.0122913	0	0	0	0	0	0	0	0.0254286	0.0158694	0	0	0.0204715	0.0436411	0	0	0	0	0	0	0.0091573	0.0369918	0.0170847	0	0.0134101	0.0208551	0	0	0	0.0138174	0.0557548	0.106252
ASV597	Bacteria	Acidobacteriota	Terriglobia	0	0	0	0.025597	0	0.0114881	0.0180125	0.0178451	0	0	0.00949397	0.0506567	0	0	0.0143399	0	0	0	0.035189	0.0142891	0	0	0	0.033502	0	0	0.0188967	0.0484901	0	0	0	0	0	0	0.0125913	0.0517886	0.0102508	0	0	0.0139034	0.022565	0	0	0.0120902	0.046287	0.0555408
ASV598	Bacteria	Chloroflexota	Dehalococcoidia	0.0384753	0.0387988	0	0	0.0284564	0	0	0.0218107	0.0126668	0	0.0208867	0.0525328	0	0	0	0	0	0	0	0	0.0400172	0	0	0	0.030209	0.0238219	0.0330693	0	0	0.033682	0	0.0184007	0.0386501	0.0213598	0	0	0	0.0274765	0	0	0	0.0255768	0	0	0.0178836	0
ASV599	Bacteria	Planctomycetota	Unclassified Planctomycetota	0.0225545	0.0164895	0	0.0271027	0.0175116	0.0191468	0.021615	0.0297418	0.022167	0.0266702	0.0161398	0	0.0348797	0	0.0163884	0	0.0167184	0.0113943	0	0.0190522	0.0192675	0.026522	0	0.0211592	0.0151045	0.0170157	0	0	0.0137146	0	0.0103623	0.0126505	0	0.0131445	0.010302	0	0.0290439	0.0202458	0.00894005	0	0.0193414	0.0268556	0	0	0	0
ASV600	Bacteria	Chloroflexota	Dehalococcoidia	0.0424555	0.0397688	0	0	0.0175116	0	0.0378263	0	0.0364172	0.0254579	0	0	0.0523195	0	0	0	0	0.027672	0.0457457	0	0.0385351	0.0216998	0	0	0.0260896	0	0	0	0	0	0	0.025301	0	0.026289	0.0618118	0	0	0.0245842	0.0134101	0	0	0.0281344	0	0	0	0
ASV601	Bacteria	Chloroflexota	Chloroflexia	0.0106139	0.0174595	0.0287097	0	0.0131337	0.0382936	0	0.0416386	0.0110835	0.0327316	0	0	0	0	0	0	0	0.0358108	0	0.0357228	0	0	0.0275476	0.0317388	0.00961195	0	0	0	0	0	0	0.0172507	0	0.0131445	0	0	0	0.021692	0.0212326	0	0.0644714	0.0485958	0	0.0414522	0	0
ASV602	Bacteria	Pseudomonadota	Deltaproteobacteria	0.0145941	0.0358889	0.0123042	0.0165628	0	0.0325496	0.0414288	0.0178451	0.00791678	0.0121228	0.0151904	0.0168856	0	0.0292151	0	0	0	0	0	0	0	0.0385775	0.0211905	0.00881632	0.0192239	0.0124782	0.017322	0.0109103	0.0519196	0	0.0241788	0	0	0	0.0251826	0	0	0	0.0145276	0.0254895	0.00483536	0.0115095	0.0173908	0.0120902	0	0
ASV603	Bacteria	Verrucomicrobiota	Unclassified Verrucomicrobiota	0.0291882	0.031039	0.0300768	0.0165628	0.0404956	0	0	0.0168537	0.0253337	0.0387931	0.0161398	0	0	0	0.0266312	0	0	0.0227887	0	0	0.025196	0.0433996	0	0	0.0288359	0	0.0220462	0	0	0	0	0.025301	0.0241563	0	0	0	0	0.0361533	0	0.0231723	0	0.0230191	0	0	0	0
ASV604	Bacteria	Verrucomicrobiota	Unclassified Verrucomicrobiota	0	0.0940871	0.0205069	0	0	0.0957341	0	0.0237935	0	0	0.0465205	0	0	0	0.018437	0	0	0	0.0703779	0	0	0	0	0	0	0	0	0	0	0	0	0	0	0	0.0572331	0	0	0	0.0614628	0	0.0306239	0	0	0	0	0
ASV605	Unknown	Unknown	Unknown	0	0.064988	0.0751921	0	0	0.0325496	0	0	0	0	0	0	0	0	0	0	0	0.0732493	0	0	0.075588	0	0	0	0	0	0.0472419	0	0	0	0	0.0690028	0	0	0	0	0	0	0	0	0.0999307	0	0	0	0	0
ASV606	Bacteria	Pseudomonadota	Alphaproteobacteria	0	0	0	0	0.0383066	0	0	0	0.093418	0.0339439	0	0	0	0	0	0	0	0	0	0	0	0	0	0	0	0.0544502	0	0	0.0626953	0	0	0.0874035	0	0	0	0	0	0.111352	0	0	0	0	0	0	0	0
ASV607	Bacteria	Pseudomonadota	Deltaproteobacteria	0.0291882	0.0368589	0	0	0.0328343	0	0	0	0.0316671	0.0193965	0	0	0.0523195	0	0	0	0.0262718	0.0227887	0.0316701	0	0.0222318	0.0337553	0	0	0.0425672	0.0306282	0	0	0	0.033682	0.02936	0.0207008	0.0289876	0.026289	0	0	0	0.033261	0	0	0	0.0230191	0.0202893	0	0	0
ASV608	Bacteria	Chloroflexota	Chloroflexia	0	0.0242492	0.0341782	0.0692625	0	0	0.0270188	0.0277591	0	0	0.0636096	0.0337711	0	0	0	0	0	0	0	0	0	0	0.0487381	0.0581877	0	0	0.0425177	0.0448534	0	0	0	0	0	0	0.0251826	0	0	0	0	0.0417101	0	0	0	0	0	0
ASV609	Bacteria	Pseudomonadota	Alphaproteobacteria	0	0	0.0300768	0.025597	0	0	0	0.0475869	0	0	0	0.0393996	0	0	0	0	0	0	0	0	0	0	0	0.033502	0	0	0	0.0654617	0	0	0	0	0	0	0	0	0	0	0	0	0.022565	0	0	0	0.0578588	0.0821038
ASV610	Bacteria	Chloroflexota	Chloroflexia	0	0	0.0287097	0	0	0.0650992	0	0.0228021	0	0.0303071	0.0284819	0	0	0	0.0430196	0.0834578	0	0.0569717	0	0	0	0.0506329	0.0445	0.0352653	0	0.0204188	0.0456671	0	0	0	0	0	0	0	0	0	0.0358778	0	0	0	0.0483536	0.0204614	0	0	0	0
ASV611	Bacteria	Pseudomonadota	Deltaproteobacteria	0	0.0368589	0	0	0.0240785	0.0555258	0.0558388	0	0.0285004	0	0.0294313	0	0	0	0	0	0	0	0.0563023	0	0	0.0433996	0	0	0	0.0181501	0	0	0	0.019813	0.0241788	0.0149506	0	0	0.0320505	0	0.0290439	0.0202458	0.0424652	0	0	0.0179037	0.0463755	0	0	0
ASV612	Bacteria	Pseudomonadota	Gammaproteobacteria	0	0	0	0.158099	0	0	0	0.118967	0	0	0	0.0750469	0	0	0	0.0571027	0	0	0	0.0428673	0	0	0	0	0	0	0	0	0	0	0	0.0644026	0	0	0	0	0	0	0	0	0.022565	0	0.0492739	0	0	0
ASV613	Bacteria	Chloroflexota	Chloroflexia	0	0	0.0218741	0.0135514	0	0	0.0450313	0.0188365	0	0.0351562	0.0275325	0	0	0	0.0389225	0.0527102	0	0.0292997	0.0387079	0	0	0	0	0.0246857	0.0164776	0	0.0409429	0	0	0	0	0	0	0	0.0366292	0	0.0170847	0	0.0290551	0.0278067	0.0402946	0	0.0666647	0.0241805	0	0
ASV614	Bacteria	Planctomycetota	Planctomycetia	0	0	0	0	0	0	0	0.0465956	0	0	0	0.054409	0	0	0	0	0	0	0	0	0	0	0	0	0	0	0	0.0654617	0	0	0	0	0	0	0	0	0	0	0	0	0.0322357	0	0	0.0518153	0.0673266	0.0821038
ASV615	Bacteria	Unclassified Bacteria	Unclassified Bacteria	0.0305149	0	0	0	0.0339287	0	0	0	0.0395839	0	0	0	0.0290664	0	0	0	0.062097	0.0211609	0	0	0.0296424	0	0	0	0.0411941	0.0272251	0	0	0.0107758	0.0356633	0.0431764	0.0299012	0.0434814	0.0394335	0.0251826	0	0	0.0202458	0	0	0	0.0319709	0	0	0	0
ASV616	Bacteria	Planctomycetota	Planctomycetia	0.0132674	0.0290991	0	0	0.0120392	0.036379	0.0450313	0	0	0.0412176	0.014241	0	0.0639461	0	0	0	0.0358252	0.034183	0	0	0.0222318	0	0.0381429	0	0.00411941	0.00680627	0	0	0	0	0.031087	0.0195508	0.0144938	0.0230029	0.0309059	0	0	0.0187997	0.0346427	0	0	0.0268556	0	0	0	0
ASV617	Bacteria	Unclassified Bacteria	Unclassified Bacteria	0	0	0	0.0526997	0	0	0	0.032716	0	0	0.0294313	0.0619137	0	0	0.040971	0.149346	0	0	0	0	0	0	0	0	0	0	0	0.0739475	0	0	0	0	0	0	0	0	0	0	0	0.104275	0.0531889	0	0	0.0328163	0.0378712	0
ASV618	Bacteria	Pseudomonadota	Gammaproteobacteria	0	0.00387988	0	0.0271027	0	0	0	0.0168537	0	0	0.00854457	0.0337711	0	0	0	0.0175701	0	0	0	0.0119076	0	0	0	0	0	0	0.00472419	0.0339431	0	0	0	0	0	0	0	0	0.0222101	0	0	0	0.0128943	0	0	0.0138174	0.0536509	0.0603704
ASV619	Bacteria	Pseudomonadota	Gammaproteobacteria	0.019901	0.0989369	0	0	0	0	0	0.0138795	0	0	0	0	0.0174398	0	0	0	0	0.0244164	0	0	0	0.0578662	0	0	0.0700299	0.0192844	0	0	0	0.00990648	0	0.0230009	0.0289876	0	0.0274719	0	0	0.0173536	0	0	0	0.0127884	0.0347816	0	0	0
ASV620	Bacteria	Unclassified Bacteria	Unclassified Bacteria	0	0	0.0464824	0.0391484	0	0	0	0.0565095	0	0	0.0180385	0.097561	0	0	0.0532623	0	0	0	0	0.0261967	0	0	0	0	0	0	0.0236209	0.0327308	0	0	0	0	0	0	0	0.0776828	0.0734641	0	0	0.0347584	0.0161179	0	0	0.0362707	0	0
ASV621	Bacteria	Chloroflexota	Chloroflexia	0	0	0	0.155088	0	0	0	0.0456042	0	0	0	0	0	0	0	0	0	0	0	0.0476304	0	0	0	0	0	0	0	0.0727352	0	0	0	0	0	0	0	0	0	0	0	0	0.169237	0	0	0	0.0441831	0
ASV622	Bacteria	Pseudomonadota	Deltaproteobacteria	0.00530694	0.0378288	0.0300768	0.0240913	0	0.0344643	0.0396275	0.0228021	0.0205836	0.0218211	0.0199373	0.00750469	0	0.0486918	0.0122913	0	0	0.0211609	0.0387079	0	0	0.053044	0.0211905	0.0246857	0	0	0.0141726	0	0	0	0	0	0	0.00821531	0.0297612	0	0	0	0.0134101	0.0231723	0.0161179	0.0166249	0	0	0	0
ASV623	Bacteria	Unclassified Bacteria	Unclassified Bacteria	0	0.032979	0.0382796	0.00752853	0	0	0.0450313	0.0118967	0	0.0254579	0	0.0206379	0	0.0324612	0.0266312	0	0	0	0	0	0	0.0241109	0.0275476	0.033502	0	0	0.0204715	0.0351554	0	0	0	0	0	0	0.0354845	0	0	0	0	0	0	0	0	0	0.0357673	0.0386371
ASV624	Bacteria	Planctomycetota	Planctomycetia	0	0	0	0	0	0	0	0	0	0	0	0.0206379	0	0	0	0	0	0	0	0	0	0	0	0	0	0	0	0.0254573	0	0	0	0	0	0	0	0	0	0	0	0	0	0	0	0	0.0294554	0.137645
ASV625	Bacteria	Chloroflexota	Chloroflexia	0	0	0.0191398	0	0	0	0	0.0406472	0	0	0.0218361	0.0637899	0	0	0	0	0	0	0	0	0	0	0	0.0387918	0	0	0	0.0460656	0	0	0	0	0	0	0	0	0.0341693	0	0	0.0463446	0.0322357	0	0	0.0276348	0.0515469	0.0434667
ASV626	Bacteria	Pseudomonadota	Deltaproteobacteria	0	0	0.0287097	0.0165628	0	0	0	0.0436214	0	0	0.0389253	0.0300188	0	0	0.0286797	0	0	0	0.0175945	0	0	0	0	0.0423183	0	0	0.0362188	0.0581882	0	0	0	0	0	0	0	0.0628861	0.0324609	0	0	0.0417101	0.0435182	0	0	0.0379979	0.0231435	0
ASV627	Bacteria	Planctomycetota	Unclassified Planctomycetota	0.0305149	0.0155195	0	0.0331255	0.0295508	0.0497817	0.0198138	0.0257763	0.0237503	0.0206088	0	0	0	0	0	0	0.0191068	0.0179054	0	0.0333413	0	0	0	0.0246857	0	0.0147469	0.058265	0	0.00979614	0.0257569	0.0224517	0.0218509	0	0	0	0	0.0170847	0	0	0	0.022565	0	0	0.0207261	0	0
ASV628	Bacteria	Chloroflexota	Chloroflexia	0	0.0096997	0.0246083	0.0120457	0	0	0	0.0178451	0	0.0157597	0.0389253	0.011257	0	0.0162306	0.0102428	0.0351401	0.0119417	0.0113943	0	0.0619195	0	0.026522	0.0275476	0.0352653	0.00961195	0	0.0188967	0.0109103	0	0	0	0	0.0169094	0	0.0125913	0	0.0239185	0	0.0167626	0.0417101	0.0322357	0.0166249	0.0115939	0.0449066	0	0
ASV629	Bacteria	Chloroflexota	Dehalococcoidia	0.00928715	0.0145495	0.0150384	0.00903424	0	0.00574405	0.0198138	0	0.0205836	0	0	0	0	0.0227228	0	0	0	0.0260442	0.0387079	0.0357228	0.0340887	0.0361664	0.0550953	0.0193959	0	0	0.0393682	0	0	0.00990648	0	0.0149506	0	0.0197167	0.0160253	0.040691	0.0102508	0	0.0257026	0.0231723	0.0161179	0.0306921	0.0492739	0.0155446	0	0
ASV630	Bacteria	Pseudomonadota	Alphaproteobacteria	0	0	0.0246083	0.0225856	0	0	0	0.0208193	0	0	0.0189879	0.043152	0	0	0.0143399	0.0307476	0	0	0	0.0261967	0	0	0	0.026449	0	0	0.0299198	0.0387921	0	0	0	0	0	0	0.0114466	0.0110975	0.0290439	0	0	0.0162206	0.0322357	0	0	0.0224533	0.0284034	0.0482963
ASV631	Bacteria	Planctomycetota	Unclassified Planctomycetota	0	0.0232793	0.0205069	0	0	0.047867	0.104473	0	0	0.0339439	0.0284819	0	0	0.0421996	0	0	0	0.0211609	0.0387079	0.00714456	0	0	0.0254286	0.0176326	0.00686568	0	0.0188967	0	0	0	0	0	0	0	0.0366292	0.0184959	0	0	0.0279376	0.0370757	0	0	0.043477	0.029362	0	0
ASV632	Bacteria	Pseudomonadota	Alphaproteobacteria	0.0305149	0.0281291	0	0	0.0175116	0.0229762	0	0	0.0158336	0.0145474	0	0	0.0755726	0	0	0	0.0167184	0.0325553	0	0	0.0296424	0.0337553	0	0	0.0247164	0.0453751	0	0	0.0176331	0.0178317	0.02936	0.0218509	0.0241563	0	0	0	0	0.0245842	0.0167626	0	0	0.0268556	0.0231877	0	0	0
ASV633	Bacteria	Acidobacteriota	Unclassified Acidobacteriota	0	0	0	0.0421598	0	0	0	0.0198279	0	0	0	0.0469043	0	0	0	0	0	0	0	0	0	0	0	0	0	0	0	0.0945558	0	0	0	0	0	0	0	0	0	0	0	0	0	0	0	0	0.0620667	0.0603704
ASV634	Bacteria	Unclassified Bacteria	Unclassified Bacteria	0	0	0	0.0376427	0	0	0	0	0	0	0	0.054409	0	0	0	0	0	0	0	0	0	0	0	0	0	0	0	0.0363676	0	0	0	0	0	0	0	0	0	0	0	0	0	0	0	0	0.0589108	0.113496
ASV635	Bacteria	Chloroflexota	Chloroflexia	0.0172476	0	0.0095699	0	0.0197006	0.0306349	0.0342238	0	0.0348338	0.047279	0.0170891	0	0	0	0	0	0	0.0195332	0	0	0.0207497	0	0.0360238	0.0123428	0.0192239	0	0.0236209	0	0	0	0	0.024151	0	0.0377904	0.0583778	0	0.0170847	0	0.0189976	0	0	0.0179037	0	0	0	0
ASV636	Bacteria	Chloroflexota	Chloroflexia	0	0.0116396	0.010937	0.0557111	0	0	0	0.0356902	0	0	0	0.054409	0	0	0	0	0	0	0	0.0285782	0	0	0.0339048	0.0317388	0	0	0	0.071523	0	0	0	0	0	0	0	0	0.0615048	0	0	0.0463446	0.0402946	0	0	0.029362	0.0315593	0
ASV637	Bacteria	Unclassified Bacteria	Unclassified Bacteria	0.025208	0.0232793	0	0	0.0317398	0	0	0	0.0285004	0	0	0	0	0.0421996	0	0	0.0310485	0	0.0422268	0	0.0163033	0.026522	0	0	0.0343284	0.0260907	0	0	0	0.0317007	0.031087	0.0333514	0.0217407	0.0295751	0.0217486	0	0	0.0390456	0.0178801	0	0	0.0191826	0	0	0	0
ASV638	Bacteria	Pseudomonadota	Gammaproteobacteria	0.0265347	0.0193994	0	0	0	0.0497817	0.0450313	0.00693976	0	0.0436422	0.0408241	0	0	0	0.0389225	0	0	0	0.0281512	0.0261967	0	0	0	0	0	0	0.0188967	0	0	0.0178317	0.0172706	0.024151	0	0	0.0274719	0	0	0	0.0301727	0.0254895	0	0.0319709	0.0231877	0	0	0
ASV639	Bacteria	Chloroflexota	Chloroflexia	0.0119406	0.0126096	0	0	0.022984	0	0	0	0.0332505	0.0133351	0	0	0	0	0	0	0.0453786	0	0	0	0.0726238	0	0	0	0.0343284	0.0351657	0	0	0.0156738	0.0435885	0.0259058	0.025301	0.026572	0.0361473	0.0160253	0	0	0.0289226	0	0	0	0.0255768	0	0	0	0
ASV640	Bacteria	Pseudomonadota	Deltaproteobacteria	0.0398021	0.0223093	0	0	0.0481569	0	0	0	0.026917	0	0	0	0.0348797	0	0	0	0.0525436	0.027672	0	0	0	0.0144665	0	0	0	0.0499127	0	0	0.0225311	0	0.0414493	0.0356514	0	0.027932	0	0	0	0.0187997	0.0212326	0	0	0.0255768	0	0	0.00420791	0
ASV641	Bacteria	Chloroflexota	Chloroflexia	0.0132674	0.0145495	0.0464824	0.0406541	0.00985028	0.0325496	0.021615	0.0228021	0	0	0.0360771	0.0769231	0.0232531	0	0	0	0.0119417	0	0	0.0309598	0.0133391	0	0	0.026449	0	0.00567189	0.0125978	0	0	0	0.00690822	0.0276011	0	0	0	0	0	0	0	0	0.0193414	0.0115095	0	0	0	0
ASV642	Bacteria	Planctomycetota	Unclassified Planctomycetota	0	0.00678979	0	0.0391484	0	0	0	0.0366816	0	0.0109105	0.0265831	0.0469043	0	0	0	0.0131775	0	0	0	0.0214337	0	0	0	0.0193959	0	0	0.00472419	0.0400044	0	0	0	0	0	0	0	0.0147967	0.0307524	0	0	0	0.0209532	0	0	0.0120902	0.046287	0.0748593
ASV643	Bacteria	Unclassified Bacteria	Unclassified Bacteria	0.0159208	0.0349189	0.0205069	0	0.0175116	0.0287202	0.0270188	0.0109053	0	0.0157597	0.0265831	0	0.0232531	0	0.0225341	0	0	0.0179054	0	0.0119076	0.0133391	0.0433996	0.0296667	0.0123428	0.0151045	0.00794065	0.0125978	0	0	0	0	0	0.0241563	0	0.0148806	0	0	0.033261	0.0223501	0	0.022565	0	0.0231877	0.00863588	0	0
ASV644	Bacteria	Chloroflexota	Chloroflexia	0	0.0126096	0.0259754	0.00903424	0.0109448	0.0344643	0	0.0198279	0	0.0242457	0.0123422	0	0	0.0551841	0.0389225	0	0.0358252	0.0325553	0	0.0404858	0.0222318	0	0	0	0.0123582	0	0.0141726	0	0	0	0	0.024151	0	0.0295751	0.0263272	0	0	0	0.0100576	0.030124	0.0193414	0.0191826	0	0.0120902	0	0
ASV645	Bacteria	Pseudomonadota	Alphaproteobacteria	0.0238812	0.0407387	0	0	0.0120392	0	0.0306213	0	0.0205836	0.0230334	0.0199373	0	0	0	0.0389225	0	0	0.0358108	0	0.0428673	0.0133391	0.0216998	0.0402619	0	0	0.0124782	0.0283451	0	0	0	0.0103623	0.0172507	0.0144938	0.0115014	0.0331952	0	0	0	0	0.0185378	0	0.0179037	0.0202893	0	0	0
ASV646	Bacteria	Pseudomonadota	Gammaproteobacteria	0.0119406	0.0096997	0.24745	0	0	0	0	0	0.120335	0	0	0	0	0	0	0	0	0	0	0	0	0	0	0	0.112597	0	0	0	0	0	0	0	0	0	0	0	0	0	0	0	0	0	0	0	0	0
ASV647	Bacteria	Chloroflexota	Chloroflexia	0	0	0	0	0	0.0880754	0.08646	0	0	0.0484913	0	0	0	0	0	0	0	0	0.0703779	0	0	0.0771549	0	0	0	0	0	0	0	0	0	0	0	0	0.0698244	0	0.0734641	0	0.0502878	0	0	0	0.0666647	0	0	0
ASV648	Bacteria	Verrucomicrobiota	Unclassified Verrucomicrobiota	0	0	0	0	0	0	0.0612425	0	0	0	0	0	0	0	0	0	0.169572	0	0	0.0619195	0	0	0	0	0	0.0896159	0	0	0.0577972	0	0	0	0.176341	0	0	0	0	0	0	0	0	0	0	0.0276348	0	0
ASV649	Bacteria	Acidobacteriota	Terriglobia	0	0	0.0369125	0.0135514	0	0	0.0162113	0.0317246	0	0.0278825	0.0246843	0.0243902	0	0	0.0471167	0	0	0	0	0.0333413	0	0.0409885	0.0529762	0.0370285	0	0	0.0267704	0	0	0	0	0	0	0	0.0148806	0.0369918	0.0410032	0	0	0	0.04513	0	0	0.0276348	0.0094678	0
ASV650	Bacteria	Acidobacteriota	Vicinamibacteria	0	0.0155195	0.0519509	0	0	0	0	0.0297418	0	0.0109105	0	0.0225141	0	0	0.059408	0	0	0	0	0	0	0	0.0445	0.0528979	0	0	0	0	0	0	0	0	0	0	0.0389185	0.166463	0.0392947	0	0	0.0440273	0.0402946	0	0	0.0431794	0	0
ASV651	Archaea	Thermoproteota	Unclassified Thermoproteota	0.0212278	0.0213393	0	0	0	0.0344643	0.0234163	0	0.0174169	0.0254579	0.0113928	0	0	0.0389535	0	0	0	0.0374386	0	0.0166706	0.0266781	0.0289331	0.0360238	0.00881632	0	0	0.017322	0	0	0	0.0362682	0.0149506	0	0.0328612	0.0240379	0	0	0.0144613	0.0178801	0	0	0.0294133	0.0376801	0	0	0
ASV652	Bacteria	Unclassified Bacteria	Unclassified Bacteria	0.0371486	0	0	0	0.0273619	0	0	0	0.0364172	0	0	0	0.0465062	0	0	0	0.0525436	0	0	0	0.0385351	0	0	0	0	0.0465095	0	0	0.0401642	0.0237756	0.0466305	0	0.0386501	0.0624363	0	0	0	0.0318149	0	0	0	0.0332498	0	0	0	0
ASV653	Bacteria	Pseudomonadota	Gammaproteobacteria	0.0212278	0.0417087	0.0095699	0	0.0262674	0.042123	0.036025	0	0	0.0072737	0.0113928	0	0	0	0	0	0	0.0130221	0.0175945	0	0	0.0723327	0.0529762	0	0.0219702	0.0215532	0.00787364	0	0	0	0	0.0138006	0	0.0115014	0.0274719	0	0	0	0.0245851	0.0254895	0	0.0127884	0.0144923	0.0103631	0	0
ASV654	Bacteria	Gemmatimonadota	Gemmatimonadia	0	0	0	0	0	0	0	0.0297418	0	0	0.0227855	0	0	0.0746608	0.0655536	0.0527102	0	0	0.0844535	0	0	0	0.0550953	0	0	0	0.0551155	0	0	0	0	0	0	0	0	0	0.0495455	0	0	0.0625652	0.0725303	0	0.0608678	0.0449066	0	0
ASV655	Bacteria	Planctomycetota	Unclassified Planctomycetota	0	0	0.0546852	0.0165628	0	0	0.0486338	0.0337074	0	0	0.0303807	0	0	0	0.0368739	0.0439252	0	0	0.0527834	0.0238152	0	0	0.042381	0.0105796	0	0	0.0362188	0.0230328	0	0	0	0	0	0	0	0.0184959	0.025627	0	0	0.0324412	0.0209532	0	0	0.039725	0.0199876	0
ASV656	Bacteria	Bacteroidota	Unclassified Bacteroidota	0	0	0	0.0120457	0	0	0	0	0	0	0	0	0	0.0194767	0	0	0	0.183937	0	0	0	0.180832	0	0	0	0	0	0	0	0.0772706	0	0	0	0	0	0	0	0	0	0.0834202	0	0	0	0.132993	0	0
ASV657	Bacteria	Bacteroidota	Flavobacteriia	0	0	0.0164055	0	0	0	0	0	0.0585842	0	0	0	0	0	0.0266312	0	0	0	0	0	0	0	0	0	0	0.0567189	0	0	0	0	0	0.0609525	0.0893785	0.0722947	0.0228932	0	0.0187931	0.054953	0.0424652	0	0	0	0	0	0	0
ASV658	Bacteria	Planctomycetota	Unclassified Planctomycetota	0.0331684	0	0	0	0.0218895	0	0	0	0.0348338	0	0	0	0	0	0	0	0.0310485	0	0	0	0.0237139	0	0	0	0.0398209	0.0294938	0	0	0.043103	0.0237756	0.0345411	0.0368015	0	0.054221	0	0	0	0.033261	0	0	0	0.047317	0	0	0	0
ASV659	Bacteria	Unclassified Bacteria	Unclassified Bacteria	0.0212278	0	0	0	0.0426845	0	0	0	0.0142502	0.0193965	0	0	0.0523195	0	0	0	0.0382135	0.0179054	0.0387079	0	0.0429814	0.0337553	0	0	0	0.0226876	0	0	0	0	0	0.0368015	0	0	0.0366292	0	0	0.0375994	0.0279376	0	0	0.0409228	0.0405785	0	0	0
ASV660	Bacteria	Pseudomonadota	Alphaproteobacteria	0	0	0.0615208	0	0	0	0	0.0763374	0	0	0	0.0806754	0	0	0	0	0	0	0	0	0	0	0	0	0	0	0.0472419	0.0339431	0	0	0	0	0	0	0	0	0	0	0	0	0.0725303	0.0332498	0	0	0.0589108	0
ASV661	Bacteria	Pseudomonadota	Alphaproteobacteria	0.019901	0.0232793	0	0	0.0295508	0.0268055	0.0342238	0	0.0253337	0	0	0	0.0523195	0	0	0	0.0214951	0	0	0	0.0281602	0	0	0	0.0164776	0.0204188	0	0	0.0117554	0.0178317	0.0224517	0.025301	0	0.0328612	0.0240379	0	0	0.0289226	0.0189976	0	0	0.0230191	0.043477	0	0	0
ASV662	Bacteria	Unclassified Bacteria	Unclassified Bacteria	0	0	0	0	0.0218895	0	0	0	0.0158336	0	0	0	0.0581328	0	0	0	0.0453786	0	0	0	0.0296424	0	0	0	0.0343284	0.0374345	0	0	0.0284088	0.033682	0.060447	0.0299012	0.0338189	0.0427196	0	0	0	0.0433839	0	0	0	0.0447593	0	0	0	0
ASV663	Bacteria	Acidobacteriota	Terriglobia	0	0.0242492	0.0369125	0.0271027	0	0.0248909	0.0486338	0.0287504	0	0.0230334	0.0427229	0	0	0	0.0512138	0	0	0	0	0.0381043	0	0	0	0.0211592	0	0	0.0488166	0	0	0	0	0	0	0	0.0137359	0.0517886	0.0307524	0	0	0	0	0	0	0.029362	0	0
ASV664	Bacteria	Bacillota	Bacilli	0	0.336579	0	0	0	0	0	0	0	0	0	0	0	0	0	0	0	0	0	0	0	0	0	0	0	0	0	0	0	0	0	0	0	0	0	0	0	0	0	0	0	0	0	0	0	0
ASV665	Bacteria	Pseudomonadota	Oligoflexia	0	0	0	0.0301141	0	0.0555258	0.036025	0	0	0.047279	0	0	0	0	0	0	0	0.0634828	0	0	0	0.0699216	0.0529762	0	0	0	0.0488166	0	0	0	0	0	0	0	0.0320505	0	0	0	0.0391127	0	0	0	0.0521724	0	0	0
ASV666	Bacteria	Chloroflexota	Chloroflexia	0.0119406	0.0145495	0.0191398	0	0	0	0	0.0277591	0	0.0230334	0.0170891	0	0	0.0292151	0	0	0.0143301	0	0.035189	0.0166706	0.0133391	0	0.0254286	0.0405551	0.0178508	0.0136125	0.0204715	0	0	0	0.0120894	0.0138006	0.0217407	0.0115014	0.0297612	0	0	0.021692	0	0.0278067	0	0.0191826	0.0231877	0.029362	0	0
ASV667	Bacteria	Acidobacteriota	Unclassified Acidobacteriota	0	0.0407387	0	0	0.022984	0	0.04323	0.0337074	0	0	0.0237349	0	0.0988257	0.0746608	0	0	0	0	0	0	0	0	0	0	0	0	0.0299198	0	0.038205	0	0.0569928	0.0184007	0	0	0.0160253	0	0	0.054953	0	0	0	0	0	0	0	0
ASV668	Bacteria	Chloroflexota	Chloroflexia	0	0	0.0492166	0	0	0.0248909	0.0486338	0	0	0.0242457	0.0189879	0	0	0.0389535	0.0696507	0	0	0.0488329	0	0.0238152	0	0.0289331	0.042381	0	0	0	0.0425177	0	0	0	0	0	0	0	0.0217486	0.0665853	0	0	0.0178801	0.0393929	0.022565	0	0	0	0	0
ASV669	Bacteria	Chloroflexota	Chloroflexia	0.0106139	0.0155195	0	0.0180685	0	0	0.0324225	0.0178451	0	0.0230334	0.0256337	0	0	0.025969	0	0	0	0.0179054	0.0281512	0	0.0177854	0	0	0.0317388	0	0	0	0.0242451	0	0	0	0	0	0	0.0274719	0	0	0	0	0.0208551	0.0274004	0.0166249	0.0202893	0.0276348	0.0410272	0
ASV670	Bacteria	Chloroflexota	Chloroflexia	0.0132674	0.00581982	0	0	0.043779	0	0	0	0.0158336	0	0	0	0	0	0	0	0.069262	0	0	0	0.0192675	0	0	0	0.0109851	0.0499127	0	0	0.0333069	0.0495324	0.0328141	0.0460019	0.0217407	0.0295751	0	0	0	0.0274765	0	0	0	0.0204614	0	0	0	0
ASV671	Bacteria	Pseudomonadota	Gammaproteobacteria	0	0.0271592	0	0	0.0306453	0	0	0	0	0	0	0	0	0	0	0	0	0	0	0	0.0296424	0.026522	0	0	0	0.0431064	0	0	0.0715118	0.0475511	0.062174	0.0299012	0.0314032	0.0345043	0	0	0	0	0.0245851	0	0	0	0	0	0	0
ASV672	Bacteria	Chloroflexota	Chloroflexia	0	0	0.0164055	0.0286084	0	0.0268055	0	0.0525439	0	0.0218211	0.0322795	0.0206379	0	0	0.0348254	0.0966353	0	0	0	0	0	0	0	0.0528979	0	0	0.0472419	0	0	0	0	0	0	0	0	0	0.0290439	0	0	0.0393929	0.04513	0	0	0.0310892	0	0
ASV673	Unknown	Unknown	Unknown	0	0.0135796	0.0232412	0.0165628	0	0.0306349	0.0198138	0.0158623	0	0.0206088	0.0370265	0	0	0	0.0286797	0.0351401	0	0.0227887	0.0211134	0	0	0	0.0105952	0.0246857	0.0288359	0	0.0251957	0	0.0176331	0	0.0103623	0.0218509	0	0	0.0217486	0	0.0187931	0	0.0145276	0	0.022565	0	0	0	0	0
ASV674	Bacteria	Pseudomonadota	Unclassified Pseudomonadota	0.06501	0	0	0	0	0.0229762	0	0	0.0522507	0.0315194	0	0	0	0	0	0	0	0.0325553	0	0	0	0	0	0	0.0425672	0.0260907	0	0	0	0	0	0.0379515	0.0483127	0.0410765	0	0	0	0.0607375	0	0	0	0.0319709	0	0	0	0
ASV675	Archaea	Methanobacteriota	Unclassified Methanobacteriota	0.019901	0.0116396	0	0	0.0383066	0	0	0	0	0.0145474	0	0	0	0	0	0	0.0143301	0.0227887	0	0	0.0237139	0	0	0	0.0274627	0.0567189	0	0	0.0186127	0.0297194	0.0259058	0.0287512	0.0386501	0.026289	0	0	0	0.0303688	0	0	0	0.0383651	0	0	0	0
ASV676	Bacteria	Bacillota	Bacilli	0	0.32688	0	0	0	0	0	0	0	0	0	0	0	0	0	0	0	0	0	0	0	0	0	0	0	0	0	0	0	0	0	0	0	0	0	0	0	0	0	0	0	0	0	0	0	0
ASV677	Bacteria	Pseudomonadota	Alphaproteobacteria	0	0	0.010937	0.025597	0	0	0	0.0188365	0	0	0.00664578	0.0150094	0	0	0	0.0307476	0	0	0	0.0142891	0	0	0	0.0123428	0	0	0.0110231	0.0424289	0	0	0	0	0	0	0	0.0332926	0.0170847	0	0	0	0.0209532	0	0	0.00863588	0.0725865	0.0676149
ASV678	Bacteria	Planctomycetota	Unclassified Planctomycetota	0	0	0.031444	0	0	0	0.0756525	0	0	0.0424299	0.0370265	0	0	0	0.0307283	0	0.0358252	0	0	0	0	0.053044	0	0	0	0	0	0	0	0	0	0.025301	0	0	0.0400632	0	0	0.0245842	0.0335252	0	0	0	0.0637663	0.0345435	0	0
ASV679	Bacteria	Chloroflexota	Chloroflexia	0.0265347	0.0145495	0	0	0	0	0	0	0.0253337	0	0	0	0.0581328	0	0	0	0.0286601	0	0	0	0.0518741	0.053044	0	0	0.0315821	0.0272251	0	0	0.0235107	0	0.0362682	0.0172507	0.0434814	0.0427196	0	0	0	0.0361533	0	0	0	0.0383651	0	0	0	0
ASV680	Bacteria	Chloroflexota	Chloroflexia	0.0238812	0	0	0	0	0	0	0	0.0316671	0	0	0	0	0	0	0	0	0	0	0	0.0518741	0	0	0	0	0.051047	0	0	0.030368	0.0495324	0	0.0264511	0.0603908	0.0607933	0.0183146	0	0	0.0260304	0	0	0	0.05499	0	0	0	0
ASV681	Bacteria	Pseudomonadota	Alphaproteobacteria	0.0265347	0	0	0	0.0339287	0	0	0	0	0	0	0	0.127892	0	0	0	0.0525436	0	0	0	0	0	0	0	0.0274627	0.0544502	0	0	0	0.0653828	0.0673552	0	0.0555596	0	0	0	0	0.0433839	0	0	0	0.0601054	0	0	0	0
ASV682	Bacteria	Planctomycetota	Phycisphaerae	0	0.031039	0.0546852	0.0406541	0	0	0	0.0366816	0	0	0.0313301	0.0300188	0	0	0.0430196	0.0527102	0	0	0	0	0	0	0	0.0299755	0	0	0	0.0303063	0	0	0	0	0	0	0	0	0.0700472	0	0	0	0.0354593	0	0	0.0207261	0	0
ASV683	Bacteria	Nitrospirota	Unclassified Nitrospirota	0	0	0.0232412	0.0240913	0	0	0	0.0198279	0	0.0206088	0.0303807	0.043152	0	0.0162306	0	0.0527102	0	0	0.0281512	0.0261967	0	0	0.0190714	0.0370285	0	0	0.017322	0.0266696	0	0	0	0	0	0	0.0206039	0.0258943	0.0222101	0	0.0279376	0.0324412	0.0257886	0	0	0.0310892	0	0
ASV684	Bacteria	Acidobacteriota	Terriglobia	0.0636833	0.0436486	0	0	0.0273619	0	0	0	0	0	0	0	0	0	0	0	0.0812037	0	0	0	0	0	0	0	0.0425672	0	0	0	0.0352661	0.0356633	0	0.0517521	0	0	0	0	0	0.0260304	0	0	0	0.0434805	0	0	0	0
ASV685	Bacteria	Planctomycetota	Unclassified Planctomycetota	0	0	0	0.0240913	0	0	0	0	0	0	0	0.054409	0	0	0	0	0	0	0	0	0	0	0	0	0	0	0	0.0509146	0	0	0	0	0	0	0	0	0.0427117	0	0	0.0254895	0.04513	0	0	0	0.0673266	0.113496
ASV686	Bacteria	Unclassified Bacteria	Unclassified Bacteria	0	0.0203694	0.0355453	0	0	0	0	0.0317246	0	0.0193965	0.0360771	0	0	0	0.0757964	0	0	0	0	0.0404858	0	0.101266	0	0	0	0	0.0425177	0	0	0	0	0	0	0	0.0389185	0	0	0	0	0	0.0322357	0	0	0.0379979	0	0
ASV687	Bacteria	Planctomycetota	Unclassified Planctomycetota	0.0145941	0.0174595	0	0	0.0186061	0.0287202	0.02882	0	0.022167	0.0327316	0	0	0	0.00973836	0	0	0.0214951	0.00976658	0.0246323	0	0.0103748	0.0120555	0	0	0.0164776	0.0158813	0	0	0.0264496	0.0297194	0.0138164	0.0138006	0.0241563	0.0328612	0.0125913	0	0	0.0159074	0.0178801	0	0	0.0179037	0.0202893	0	0	0
ASV688	Bacteria	Pseudomonadota	Unclassified Pseudomonadota	0.0756239	0	0	0	0.0481569	0	0	0	0	0	0	0	0	0	0	0	0.076427	0	0	0	0	0	0	0	0.0466866	0	0	0	0.0519196	0.0634015	0.0811716	0	0	0	0	0	0	0.0462762	0	0	0	0	0	0	0	0
ASV689	Bacteria	Chloroflexota	Chloroflexia	0	0	0.0560523	0.0286084	0	0	0	0.0208193	0	0	0	0.0487805	0	0	0.0696507	0	0	0	0	0	0	0	0	0	0	0	0	0	0	0	0	0	0	0	0.0606671	0.133171	0.0529625	0	0	0.0741513	0.0612478	0	0	0	0	0
ASV690	Bacteria	Chloroflexota	Chloroflexia	0	0.0174595	0	0.0301141	0	0.0248909	0.0162113	0.0277591	0	0.00969826	0.0265831	0.0469043	0	0	0.0430196	0	0	0	0	0	0	0	0.0105952	0.0229224	0	0	0.0629892	0	0	0	0	0	0	0	0.0228932	0	0.0341693	0	0.00782254	0.0463446	0.0354593	0	0	0.0241805	0	0
ASV691	Bacteria	Acidobacteriota	Unclassified Acidobacteriota	0	0	0	0.0346313	0	0	0	0.0188365	0	0	0.0180385	0.0525328	0	0	0.0286797	0	0	0	0	0	0	0	0	0.0193959	0	0	0	0.0472779	0	0	0	0	0	0	0	0	0.0273355	0	0	0.0185378	0.0306239	0	0	0	0.046287	0.0313926
ASV692	Bacteria	Actinomycetota	Unclassified Actinomycetota	0.0265347	0	0	0	0.0404956	0	0	0	0.049084	0	0	0	0	0	0	0	0	0	0	0	0.0563205	0	0	0	0	0.083944	0	0	0.0166534	0	0.0431764	0.048302	0.0579752	0	0	0	0	0.0318149	0	0	0	0	0	0	0	0
ASV693	Bacteria	Unclassified Bacteria	Unclassified Bacteria	0	0.0678979	0	0	0.0142282	0.0612698	0	0	0	0.0630387	0.0180385	0	0	0.0324612	0	0	0	0.0179054	0.0738968	0.0190522	0	0	0.0105952	0	0	0	0	0	0	0	0	0.0161007	0	0	0.0183146	0	0	0	0.0536403	0	0	0.0140672	0	0	0	0
ASV694	Bacteria	Verrucomicrobiota	Verrucomicrobiia	0	0	0	0	0	0	0	0	0	0	0	0	0	0	0	0	0.121806	0	0	0	0	0	0	0	0	0.0521814	0	0	0.0695526	0.0574576	0	0	0.0845472	0	0	0	0	0.0621837	0	0	0	0.0690572	0	0	0	0
ASV695	Bacteria	Pseudomonadota	Alphaproteobacteria	0.0796041	0	0	0.0301141	0	0	0	0.0307332	0	0	0	0	0	0	0	0	0	0	0	0	0.0177854	0	0	0	0	0	0	0	0	0	0	0.00920037	0	0	0	0	0	0	0	0.0463446	0	0	0.0579693	0.271167	0	0
ASV696	Bacteria	Chloroflexota	Chloroflexia	0	0	0	0	0.0339287	0	0	0	0	0	0	0	0	0	0	0	0	0	0	0	0.0444635	0	0	0	0.0357015	0.0578533	0	0	0.0695526	0.0554763	0.0500846	0	0.0410658	0.0246459	0	0	0	0	0	0	0	0.0383651	0	0	0	0
ASV697	Bacteria	Chloroflexota	Chloroflexia	0	0	0.0273426	0	0	0.0153175	0.0306213	0.00892255	0	0	0.0189879	0.0318949	0	0.025969	0.0368739	0.0439252	0	0	0	0.0190522	0	0.0192887	0.0275476	0.0581877	0	0	0.0299198	0.0206083	0	0	0	0	0	0	0.00801264	0.0295935	0.0410032	0	0	0.0278067	0.0322357	0	0	0.0345435	0.0126237	0
ASV698	Bacteria	Pseudomonadota	Gammaproteobacteria	0.0132674	0	0.0259754	0	0.0142282	0.0134028	0.0234163	0	0.049084	0.0254579	0	0	0	0.0129845	0	0	0.0406019	0.0553439	0.0457457	0	0.0281602	0.0337553	0.0127143	0	0.0178508	0.0158813	0.0188967	0	0	0	0	0.0184007	0.00966254	0.00821531	0.0125913	0	0	0.0260304	0	0	0	0.0166249	0	0	0	0
ASV699	Bacteria	Acidobacteriota	Unclassified Acidobacteriota	0.0185743	0.0096997	0	0	0.0131337	0	0.0378263	0	0.0174169	0.0206088	0.00854457	0	0	0	0.018437	0	0.0310485	0.0244164	0.0598212	0	0.0163033	0	0.0339048	0	0.0233433	0	0	0	0	0.019813	0	0.0138006	0	0.027932	0.0171699	0	0	0.0245842	0.0201151	0	0	0.0409228	0.0405785	0	0	0
ASV700	Bacteria	Chloroflexota	Chloroflexia	0.0119406	0.0184294	0	0	0.0164171	0	0.0126088	0	0.0126668	0.0181842	0	0	0	0.0584302	0	0	0.0286601	0.0179054	0.0211134	0	0.0207497	0	0	0	0.0178508	0.0272251	0	0	0.0205719	0.0217943	0.031087	0.0207008	0.045897	0.0230029	0.0183146	0	0	0.0245842	0	0	0	0.0242979	0	0	0	0
ASV701	Bacteria	Chloroflexota	Chloroflexia	0.0212278	0	0	0	0	0	0	0	0.0300838	0	0	0	0	0	0	0	0.0406019	0	0	0	0.0296424	0	0	0	0.0233433	0.0215532	0	0	0.0352661	0.0257569	0.0276329	0.0299012	0.0410658	0.054221	0.0469312	0	0	0.0303688	0	0	0	0.0166249	0	0	0	0
ASV702	Bacteria	Chloroflexota	Dehalococcoidia	0	0	0.031444	0.0391484	0	0	0	0.0128881	0	0	0.0161398	0.0225141	0	0	0.0983304	0	0	0	0	0	0	0	0	0.0528979	0	0	0.051966	0	0	0	0	0	0	0	0	0	0	0	0	0	0.0725303	0	0	0.0777229	0.0336633	0
ASV703	Bacteria	Pseudomonadota	Gammaproteobacteria	0.0212278	0	0	0	0.0251729	0	0	0	0.0364172	0	0	0	0	0	0	0	0	0	0	0	0	0	0	0	0	0.0351657	0	0	0.120493	0.0752893	0	0.0115005	0	0.0460057	0	0	0	0.0245842	0	0	0	0.0179037	0	0	0	0
ASV704	Bacteria	Acidobacteriota	Vicinamibacteria	0	0.0387988	0	0	0	0.0325496	0.0450313	0	0	0.0400053	0.0151904	0	0	0.0389535	0	0	0.0214951	0.0472051	0.0316701	0	0	0	0.0360238	0	0	0	0	0	0	0	0	0	0.0338189	0	0.0274719	0	0.0102508	0	0.0391127	0.0115861	0	0	0.0666647	0.0155446	0	0
ASV705	Bacteria	Acidobacteriota	Terriglobia	0	0.0271592	0.0259754	0	0	0	0.0342238	0.00495697	0	0.0242457	0.0379759	0	0	0	0.0225341	0.0219626	0	0	0	0.0452489	0	0	0	0.0246857	0	0	0.0488166	0	0	0	0	0	0	0	0.0343399	0	0.0222101	0	0.0223501	0.0393929	0.0193414	0	0	0.0345435	0	0
ASV706	Bacteria	Acidobacteriota	Unclassified Acidobacteriota	0	0	0.0191398	0.0331255	0	0	0	0.0228021	0	0.0218211	0.0246843	0.0318949	0	0	0.0348254	0	0	0	0	0	0	0	0	0.033502	0.00823882	0	0.017322	0.0363676	0	0	0	0	0	0	0	0	0.0444201	0	0	0	0.0274004	0	0	0.0449066	0.0347153	0.0169037
ASV707	Bacteria	Pseudomonadota	Alphaproteobacteria	0.0543961	0.0290991	0	0	0.045968	0	0.0540375	0	0	0.0290948	0.014241	0	0	0	0.040971	0	0	0	0	0.0619195	0	0	0	0	0.030209	0	0	0	0.0225311	0	0	0	0	0.0328612	0	0	0	0	0	0	0	0.0383651	0	0	0	0
ASV708	Bacteria	Acidobacteriota	Unclassified Acidobacteriota	0	0	0.0218741	0.0240913	0	0	0	0.0118967	0	0	0.0104434	0.0300188	0	0	0.0307283	0	0	0	0	0	0	0	0	0	0	0	0.0220462	0.0787965	0	0	0	0	0	0	0	0	0.0392947	0	0	0.0579307	0.04513	0	0	0	0.0378712	0
ASV709	Bacteria	Pseudomonadota	Deltaproteobacteria	0	0	0.0150384	0.0165628	0	0.042123	0.0414288	0.0237935	0	0	0.0113928	0.011257	0	0.0227228	0.018437	0	0	0	0	0.0214337	0	0	0.0360238	0.0564245	0	0	0.0330693	0	0	0	0	0	0	0	0.0343399	0.0443902	0.0205016	0	0.0290551	0.0370757	0.00805893	0	0	0.029362	0	0
ASV710	Bacteria	Pseudomonadota	Gammaproteobacteria	0.025208	0.0223093	0	0	0.0306453	0.0248909	0.0450313	0	0.022167	0.0327316	0	0	0.0465062	0	0	0	0.062097	0.0504607	0	0	0.0207497	0	0	0	0.0178508	0.00907503	0	0	0	0	0.0172706	0	0.0193251	0.0312182	0.00114466	0	0	0.0159074	0.0167626	0	0	0.00127884	0.0202893	0	0	0
ASV711	Bacteria	Chloroflexota	Chloroflexia	0	0.0252192	0.0410139	0.0331255	0	0	0	0.0297418	0	0	0.0313301	0.0412758	0	0	0.0491652	0	0	0	0	0	0	0	0	0.0370285	0	0	0.0409429	0.0181838	0	0	0	0	0	0	0	0	0.0205016	0	0	0	0.04513	0	0	0.0379979	0.0105198	0
ASV712	Bacteria	Acidobacteriota	Vicinamibacteria	0.0318416	0.0145495	0	0	0.0317398	0.042123	0.0324225	0	0.0174169	0.0290948	0	0	0	0.0486918	0	0	0	0	0	0	0	0.053044	0.0445	0	0	0	0	0	0	0	0	0.025301	0	0	0.0263272	0	0	0.0187997	0.0279376	0	0	0.0255768	0.0463755	0	0	0
ASV713	Bacteria	Chloroflexota	Chloroflexia	0.0265347	0	0	0	0.0142282	0	0	0.00991395	0	0.0206088	0.0161398	0.0318949	0	0	0	0	0	0	0	0	0	0	0.0254286	0	0.0123582	0.0192844	0.017322	0.0327308	0	0	0	0.0172507	0.0410658	0	0.0125913	0.0554877	0	0.0245842	0.0201151	0	0.0322357	0	0	0	0.0305074	0
ASV714	Bacteria	Chloroflexota	Chloroflexia	0	0	0	0.0602283	0	0	0	0.0158623	0	0	0.0189879	0	0	0	0.0389225	0	0	0	0	0	0	0	0	0	0	0	0	0.0594004	0	0	0	0	0	0	0	0	0	0	0	0.0718341	0	0	0	0	0.0831063	0.0338074
ASV715	Bacteria	Planctomycetota	Unclassified Planctomycetota	0	0.0281291	0	0	0.00985028	0.0382936	0	0	0	0.0278825	0.0341783	0	0	0.025969	0.0225341	0	0	0.0292997	0.0633401	0	0	0.026522	0.0360238	0	0	0	0	0	0	0	0	0	0	0.0131445	0.0331952	0	0	0	0.0502878	0	0	0.0140672	0	0.0449066	0	0
ASV716	Bacteria	Pseudomonadota	Deltaproteobacteria	0	0	0.0150384	0.025597	0	0.0114881	0	0.0297418	0	0.00606141	0.0246843	0.0412758	0	0	0.018437	0.0527102	0	0	0	0.0333413	0	0	0.0190714	0.0211592	0	0	0.0204715	0.0400044	0	0	0	0	0	0	0	0.0147967	0.0392947	0	0	0.0231723	0.0193414	0	0	0.0224533	0.0305074	0
ASV717	Bacteria	Pseudomonadota	Alphaproteobacteria	0	0	0	0	0	0	0	0	0	0	0	0.0487805	0	0	0	0	0	0	0	0	0	0	0	0	0	0	0	0.0642494	0	0	0	0	0	0	0	0	0	0	0	0	0	0	0	0.0500881	0.0852102	0.0893482
ASV718	Bacteria	Acidobacteriota	Terriglobia	0.0305149	0.0135796	0	0	0.0164171	0	0	0	0.0300838	0	0	0	0	0	0	0	0.0286601	0.0244164	0	0	0.037053	0	0	0	0.0123582	0.0238219	0	0	0.0293884	0.0416072	0.0276329	0.0276011	0.0434814	0.0328612	0	0	0	0.0202458	0	0	0	0.0281344	0	0	0	0
ASV719	Bacteria	Pseudomonadota	Gammaproteobacteria	0.019901	0.0135796	0	0	0.0295508	0.0287202	0	0	0.0237503	0	0.0123422	0	0	0	0	0	0.0310485	0.0146499	0	0	0.0207497	0	0.0296667	0	0.0274627	0.00907503	0	0	0.0156738	0.0237756	0.0172706	0.0138006	0	0.0460057	0.0263272	0	0	0.0144613	0.0335252	0	0	0	0	0	0	0
ASV720	Bacteria	Pseudomonadota	Alphaproteobacteria	0	0.0164895	0.0232412	0	0.0186061	0.0306349	0	0.00495697	0	0.0218211	0	0	0	0	0	0	0.0214951	0	0	0.0261967	0.0133391	0	0	0	0.0151045	0	0.0330693	0.0181838	0.00587769	0	0	0.00920037	0	0.0164306	0.0160253	0	0	0	0.0134101	0.0324412	0	0.0306921	0	0.0379979	0.0157797	0
ASV721	Bacteria	Actinomycetota	Unclassified Actinomycetota	0.0172476	0	0.0177727	0.0210799	0	0.0229762	0	0.0158623	0	0	0.0123422	0.0225141	0	0	0.018437	0	0	0	0.0175945	0.0214337	0	0	0.0148333	0	0	0	0.017322	0.0181838	0	0	0	0	0	0	0.0206039	0.0369918	0	0	0.0201151	0	0.0209532	0.0217402	0.00579693	0.029362	0.0420791	0.00724445
ASV722	Archaea	Methanobacteriota	Unclassified Methanobacteriota	0	0.0213393	0.0615208	0.0331255	0	0	0	0	0	0.0460667	0.055065	0	0	0	0	0	0	0.027672	0	0	0	0.053044	0	0	0	0	0.0535408	0	0	0	0	0	0	0	0	0	0	0	0	0	0.0580243	0	0	0.039725	0	0
ASV723	Bacteria	Pseudomonadota	Deltaproteobacteria	0	0	0	0.0406541	0	0	0	0.0267677	0	0	0.0351277	0.0562852	0	0	0	0	0	0	0	0	0	0	0	0	0	0	0	0.0678862	0	0	0	0	0	0	0	0	0.0461286	0	0	0	0	0	0	0	0.0294554	0.0241482
ASV724	Bacteria	Unclassified Bacteria	Unclassified Bacteria	0	0.0300691	0.0451152	0	0	0.00957341	0	0.00991395	0	0	0.0227855	0.0225141	0	0.0292151	0.0163884	0	0	0.0292997	0.0246323	0.0381043	0	0.0289331	0.0127143	0.0141061	0	0	0	0.014547	0	0	0	0	0	0.0312182	0.0125913	0.0295935	0.0205016	0	0.0145276	0.0393929	0	0	0.0144923	0.0172718	0.0094678	0
ASV725	Bacteria	Acidobacteriota	Vicinamibacteria	0.045109	0.0203694	0	0	0	0.0191468	0.0198138	0	0.0253337	0.0133351	0	0	0	0.0486918	0	0	0.0238834	0	0	0	0.0118569	0.0289331	0	0	0.0480598	0.0124782	0	0	0	0	0	0.0425517	0	0.0476488	0	0	0	0.0187997	0.0178801	0	0	0.0191826	0.0289847	0	0	0
ASV726	Bacteria	Unclassified Bacteria	Unclassified Bacteria	0	0.0213393	0.0287097	0.0466769	0	0	0	0	0	0.0206088	0.0199373	0	0	0	0.0512138	0	0	0	0	0.0571565	0	0	0	0.026449	0	0	0	0	0	0	0	0	0	0	0.0183146	0	0.0666302	0	0.0379952	0.0440273	0	0	0	0.0500881	0	0
ASV727	Bacteria	Pseudomonadota	Gammaproteobacteria	0	0	0	0	0	0	0	0	0	0	0	0	0	0	0	0	0	0	0	0	0	0	0	0	0	0	0	0	0	0	0	0	0	0	0	0	0	0	0	0	0	0	0	0	0	0.217334
ASV728	Bacteria	Pseudomonadota	Gammaproteobacteria	0	0	0	0.0195742	0	0	0	0.00892255	0.022167	0.0327316	0	0	0	0	0	0	0	0.0130221	0	0	0	0	0	0	0	0	0.0188967	0.0363676	0	0	0	0	0	0	0	0.0517886	0	0	0	0.0324412	0	0	0	0	0.0357673	0.0410519
ASV729	Bacteria	Unclassified Bacteria	Unclassified Bacteria	0	0	0.0505838	0.0180685	0	0	0	0.0237935	0	0	0.0275325	0.0281426	0	0	0.0348254	0	0	0	0	0	0	0	0	0.0299755	0	0	0.0377935	0.0278818	0	0	0	0	0	0	0	0	0.025627	0	0	0.0417101	0	0	0	0	0	0.0289778
ASV730	Bacteria	Pseudomonadota	Unclassified Pseudomonadota	0	0	0	0.0346313	0	0	0	0.0307332	0	0	0	0.0506567	0	0	0	0	0	0	0	0	0	0	0	0	0	0	0	0.0690984	0	0	0	0	0	0	0	0	0	0	0	0	0	0	0	0	0.0599628	0
ASV731	Bacteria	Chloroflexota	Chloroflexia	0.0159208	0.0174595	0.0164055	0	0.00766133	0.0153175	0	0	0.0126668	0.0157597	0	0	0	0.0162306	0	0	0.0191068	0.0244164	0.0387079	0	0.037053	0	0.0105952	0.0158694	0.0178508	0.0215532	0.0220462	0	0.0068573	0.0257569	0.0172706	0.0310513	0	0.0197167	0.0148806	0	0	0	0.0156451	0	0	0.0115095	0.0115939	0	0	0
ASV732	Bacteria	Planctomycetota	Unclassified Planctomycetota	0	0.0232793	0.0355453	0	0.00656685	0.0440377	0	0	0	0.0327316	0.0170891	0	0	0	0	0	0	0.0488329	0	0.0309598	0.0148212	0	0.0360238	0.0193959	0	0.00567189	0.0299198	0	0	0	0	0.0138006	0	0	0.0206039	0	0	0	0.0167626	0	0	0.0179037	0.0318831	0.0207261	0	0
ASV733	Bacteria	Chloroflexota	Chloroflexia	0	0.0106697	0	0.0240913	0	0	0	0.0247849	0	0.016972	0.0208867	0.011257	0	0	0.0327768	0.0878503	0	0	0.035189	0	0	0	0.0275476	0	0.00549254	0.00567189	0.0204715	0.0484901	0	0	0.0172706	0.0172507	0	0	0	0	0.0170847	0	0	0.050979	0.022565	0	0	0.0241805	0.0115718	0
ASV734	Bacteria	Chloroflexota	Chloroflexia	0	0.0106697	0.0328111	0.0225856	0	0.0153175	0.0270188	0.0317246	0	0.0121228	0.0208867	0.0262664	0	0	0.0122913	0.0527102	0	0	0	0.0261967	0	0	0	0.0299755	0	0	0.0204715	0.0218206	0	0	0	0	0	0	0.0114466	0	0.0222101	0	0.0100576	0.0231723	0.0354593	0	0	0.0207261	0.00631187	0
ASV735	Bacteria	Chloroflexota	Chloroflexia	0	0.00872973	0.0369125	0.0180685	0	0.0134028	0	0.0198279	0	0.0230334	0.0218361	0.0206379	0	0	0.0204855	0	0	0	0	0.059538	0	0	0.0169524	0	0	0	0.0472419	0.0278818	0	0	0	0	0	0	0.0148806	0.0591869	0.0119593	0	0.0245851	0.0347584	0	0	0	0.0224533	0	0
ASV736	Bacteria	Chloroflexota	Chloroflexia	0.0318416	0.0116396	0	0	0.0153227	0	0	0	0.0190003	0	0	0	0.0406929	0	0	0	0.0262718	0	0	0	0.0296424	0	0	0	0	0.065794	0	0	0.0411438	0.0455698	0.0466305	0.024151	0.0217407	0.0131445	0	0	0	0.021692	0	0	0	0.00895186	0	0	0	0
ASV737	Bacteria	Actinomycetota	Unclassified Actinomycetota	0	0	0	0	0	0	0	0	0	0	0	0	0	0	0	0	0	0	0	0	0	0	0	0	0.0260896	0.0941534	0	0	0.0705322	0	0.126075	0	0.0917941	0	0	0	0	0	0	0	0	0.0306921	0	0	0	0
ASV738	Bacteria	Pseudomonadota	Gammaproteobacteria	0	0	0	0	0	0	0	0	0	0	0	0	0	0	0	0	0.186291	0	0.102048	0	0.133391	0	0	0	0	0.00794065	0	0	0	0	0	0	0	0	0	0.388414	0	0	0	0	0	0	0	0	0	0
ASV739	Bacteria	Planctomycetota	Planctomycetia	0	0	0	0	0	0	0	0	0	0	0	0	0	0	0	0	0	0	0	0	0	0	0	0	0	0	0	0.144258	0	0	0	0	0	0	0	0	0.0905488	0	0	0	0.0386828	0	0	0	0.0536509	0
ASV740	Bacteria	Acidobacteriota	Unclassified Acidobacteriota	0	0.00581982	0.031444	0	0.0142282	0.0555258	0.0126088	0	0	0.00606141	0.0180385	0	0	0.0357073	0.040971	0	0	0.0227887	0.0527834	0.0500119	0	0	0.0254286	0	0.0123582	0	0	0	0	0.0118878	0.0172706	0.0149506	0.0120782	0	0.0171699	0	0.0222101	0	0.0212326	0	0	0.0153461	0	0.0172718	0	0
ASV741	Bacteria	Acidobacteriota	Vicinamibacteria	0	0.0261892	0.0546852	0.0376427	0	0.0306349	0	0.00594837	0	0.0181842	0.0294313	0	0	0	0.0368739	0	0	0	0	0	0	0	0	0.0617142	0	0	0.0330693	0	0	0	0	0	0	0	0	0	0.0119593	0	0	0.0671996	0.0193414	0	0	0.0414522	0	0
ASV742	Bacteria	Chloroflexota	Dehalococcoidia	0	0	0.0191398	0.0481826	0	0	0	0.0138795	0	0	0	0.0525328	0	0	0	0.0571027	0	0	0	0	0	0	0	0.0211592	0	0	0.0188967	0.0460656	0	0	0	0	0	0	0	0.0110975	0.0358778	0	0	0	0.0370711	0	0	0.0328163	0.0368192	0
ASV743	Bacteria	Unclassified Bacteria	Unclassified Bacteria	0.0225545	0	0	0	0.0164171	0	0	0	0.0285004	0	0	0	0.0523195	0	0	0	0.0262718	0	0	0	0.0400172	0	0	0	0.0247164	0.0385689	0	0	0.0333069	0.0356633	0.0431764	0.0218509	0.0362345	0	0	0	0	0.0274765	0	0	0	0.0306921	0	0	0	0
ASV744	Bacteria	Acidobacteriota	Unclassified Acidobacteriota	0	0.0203694	0.042381	0	0	0.00957341	0.01441	0.0198279	0.00633342	0.0157597	0.0256337	0.0168856	0	0	0	0.0219626	0	0.0260442	0	0	0	0.0192887	0.0339048	0.0511347	0	0	0.0330693	0	0	0	0	0.00805033	0	0	0.0217486	0.0184959	0	0	0.00782254	0.0278067	0.0161179	0.00639419	0.0144923	0	0	0
ASV745	Bacteria	Chloroflexota	Chloroflexia	0	0	0.00410139	0.0376427	0	0	0	0.00495697	0	0	0.0104434	0.0318949	0	0	0	0	0	0	0	0	0	0	0	0	0	0	0	0.0484901	0	0	0	0	0	0	0	0	0.0170847	0	0	0	0.022565	0	0	0	0.049443	0.0724445
ASV746	Bacteria	Planctomycetota	Planctomycetia	0	0.0164895	0.0355453	0	0.0284564	0	0	0.0148709	0.0791678	0.00848598	0	0	0	0	0	0	0.0501552	0	0	0	0	0	0	0	0	0.0408376	0	0	0	0	0	0.0621025	0	0	0.0560885	0	0	0	0	0	0	0	0	0	0	0
ASV747	Bacteria	Unclassified Bacteria	Unclassified Bacteria	0.0504159	0	0	0	0.0284564	0	0	0	0	0	0	0	0	0	0	0	0.0358252	0.0358108	0	0	0.0281602	0	0	0	0.0494329	0.051047	0	0	0	0	0.0449035	0	0	0.0607933	0	0	0	0.0520607	0	0	0	0	0	0	0	0
ASV748	Unknown	Unknown	Unknown	0.0106139	0.0164895	0	0.0376427	0.00547238	0	0.0180125	0.0148709	0.0110835	0.0218211	0.0275325	0	0	0	0	0	0	0.0113943	0	0	0.0133391	0.0192887	0	0.0123428	0.00686568	0	0.017322	0	0	0.00594389	0	0.0138006	0.00966254	0.0164306	0.0217486	0	0	0.0187997	0.0100576	0.0208551	0.0193414	0.0153461	0	0	0.0094678	0
ASV749	Bacteria	Planctomycetota	Unclassified Planctomycetota	0	0.0155195	0.0232412	0.0286084	0.00985028	0.0153175	0.0270188	0.0317246	0.0174169	0.0121228	0.0208867	0	0	0	0.0102428	0	0	0.0260442	0.0387079	0	0.0237139	0	0	0	0	0	0.0251957	0	0	0.0178317	0	0.0149506	0	0	0	0.0258943	0	0.0159074	0	0	0.0241768	0.0140672	0	0.0189989	0	0
ASV750	Bacteria	Pseudomonadota	Deltaproteobacteria	0	0	0	0	0.0820856	0	0	0	0	0	0	0	0	0	0	0	0	0	0	0	0	0	0	0	0	0	0	0	0.0538788	0	0	0	0	0	0.0618118	0	0	0	0.0525228	0	0	0.0882398	0	0	0	0
ASV751	Bacteria	Verrucomicrobiota	Verrucomicrobiia	0.0331684	0.0232793	0	0	0.0120392	0	0	0	0.0142502	0	0	0	0	0	0	0	0.0334368	0	0	0	0.0192675	0	0	0	0	0.0397032	0	0	0.0666138	0.0277382	0.0431764	0.0184007	0.0193251	0.0180737	0	0	0	0.0245842	0	0	0	0.0127884	0	0	0	0
ASV752	Bacteria	Chloroflexota	Chloroflexia	0.0238812	0.00678979	0	0	0.0087558	0	0	0	0.022167	0.0121228	0	0	0	0	0	0	0	0.0260442	0	0	0.0400172	0.0168776	0	0	0.0109851	0.0283595	0	0	0.0244904	0.0277382	0.0224517	0.025301	0.0314032	0.026289	0	0	0	0.0173536	0.0178801	0	0	0.0268556	0.0173908	0	0	0
ASV753	Bacteria	Pseudomonadota	Deltaproteobacteria	0	0.00872973	0.0177727	0.0210799	0	0.0248909	0.0252175	0.0218107	0	0.0254579	0.014241	0.011257	0	0	0.0143399	0.0263551	0	0	0.0387079	0.0357228	0	0	0	0.0370285	0	0	0.0330693	0.0339431	0	0	0	0	0	0	0	0.040691	0.0273355	0	0.0122926	0.030124	0	0	0	0.0189989	0	0
ASV754	Bacteria	Chloroflexota	Chloroflexia	0	0	0.0164055	0.0286084	0	0	0	0.0287504	0	0	0.0208867	0	0	0.0454457	0.0532623	0.0790653	0	0.0146499	0	0	0	0	0.0402619	0	0	0	0.0299198	0.0157593	0	0	0	0	0	0	0.0160253	0.0702845	0.0358778	0	0.0212326	0	0	0	0	0.0431794	0	0
ASV755	Bacteria	Pseudomonadota	Deltaproteobacteria	0	0.0601381	0	0	0.0525348	0.0382936	0.050435	0	0	0.0193965	0	0	0	0.0714147	0	0	0	0.0325553	0	0	0	0.0433996	0	0	0	0	0	0	0	0.0475511	0	0	0	0	0.0331952	0	0	0	0	0	0	0	0.0318831	0	0	0
ASV756	Bacteria	Deferribacterota	Deferribacteres	0.0145941	0.0145495	0.0177727	0	0.00985028	0.0268055	0	0.0188365	0.0110835	0.016972	0.0275325	0.011257	0	0.0324612	0.0143399	0	0	0.0146499	0	0.0190522	0	0	0.0148333	0.0193959	0.0192239	0.00794065	0.0157473	0	0.0107758	0	0	0.00690028	0.0217407	0	0.0091573	0	0	0.0101229	0.0201151	0	0	0.0230191	0	0	0	0
ASV757	Bacteria	Pseudomonadota	Gammaproteobacteria	0.0212278	0.0223093	0	0	0.0175116	0	0.02882	0	0	0.0157597	0.0180385	0	0	0.0292151	0	0	0.0214951	0	0	0	0	0.0241109	0.0317857	0	0.0192239	0	0	0	0	0.0217943	0.0138164	0.0172507	0.0338189	0.0115014	0.0309059	0	0	0.0202458	0.0122926	0	0	0.0268556	0.0260862	0	0	0
ASV758	Bacteria	Pseudomonadota	Alphaproteobacteria	0	0	0	0	0	0	0	0.0138795	0	0	0	0.0412758	0	0	0	0	0	0	0	0	0	0	0	0	0	0	0	0.0521269	0	0	0	0	0	0	0	0	0	0	0	0	0	0	0	0	0.0547029	0.103837
ASV759	Archaea	Methanobacteriota	Unclassified Methanobacteriota	0	0	0	0	0	0	0	0	0	0	0	0	0	0	0	0	0	0	0	0	0	0	0	0	0	0	0	0.0157593	0	0	0	0	0	0	0	0	0	0	0	0	0	0	0	0	0.0115718	0.123156
ASV760	Bacteria	Pseudomonadota	Oligoflexia	0	0.00678979	0.031444	0.0286084	0.00656685	0	0.01441	0.0356902	0.0142502	0	0.0132916	0	0	0	0.0245826	0	0	0	0.0105567	0.0142891	0.0222318	0.0216998	0.0254286	0	0.0109851	0.0124782	0.00787364	0.0109103	0	0	0	0.0103504	0	0.0147876	0	0	0.0187931	0.0173536	0	0.0231723	0.022565	0	0	0.0310892	0	0
ASV761	Bacteria	Pseudomonadota	Gammaproteobacteria	0	0.125126	0	0	0	0	0	0	0	0	0.0436723	0	0	0	0	0	0	0	0	0	0	0	0	0.0617142	0	0	0	0	0	0	0	0	0	0	0	0	0	0	0.0279376	0	0	0	0	0	0	0
ASV762	Bacteria	Pseudomonadota	Deltaproteobacteria	0	0	0	0	0	0	0	0.0168537	0	0	0	0	0	0	0	0	0	0	0	0.0190522	0	0	0	0	0	0	0	0.0751597	0	0	0	0	0	0	0	0	0	0	0	0	0	0	0	0	0.0631187	0.173867
ASV763	Bacteria	Pseudomonadota	Deltaproteobacteria	0.0132674	0.0397688	0.0259754	0	0.00547238	0.0593551	0.021615	0.00991395	0.0142502	0.0375808	0.0132916	0	0	0	0	0	0	0	0.0211134	0.0166706	0	0.0216998	0.0466191	0	0	0	0	0	0	0	0	0	0	0	0.0309059	0	0	0	0.0335252	0	0	0	0.0289847	0	0	0
ASV764	Bacteria	Planctomycetota	Unclassified Planctomycetota	0.0238812	0.0213393	0	0	0.0218895	0.0134028	0.0126088	0	0.0253337	0.0121228	0	0	0	0	0	0	0.0191068	0	0	0	0.037053	0	0	0	0.0343284	0.0317626	0	0	0.00783691	0.0178317	0.0259058	0.0138006	0	0.026289	0.0091573	0	0	0.0303688	0	0	0	0.0230191	0	0	0	0
ASV765	Bacteria	Pseudomonadota	Deltaproteobacteria	0	0	0.0560523	0.0210799	0	0.0325496	0.0252175	0.0138795	0	0.0181842	0.0275325	0	0	0	0.0348254	0.0922428	0	0	0	0.0214337	0	0	0.0233095	0	0	0	0.0283451	0	0	0	0	0	0	0	0	0	0.0324609	0	0.0245851	0	0.0274004	0	0	0.0224533	0	0
ASV766	Bacteria	Pseudomonadota	Gammaproteobacteria	0	0	0	0	0	0	0	0	0	0	0	0	0	0	0	0	0	0	0.0844535	0	0	0	0	0	0	0.302879	0	0	0	0	0	0	0	0	0	0	0	0	0	0	0	0	0	0	0	0
ASV767	Bacteria	Pseudomonadota	Unclassified Pseudomonadota	0.025208	0.0184294	0	0	0	0	0	0	0	0.0218211	0.0161398	0.0150094	0	0.0227228	0.0307283	0	0.0167184	0	0.0492646	0.0285782	0	0.0168776	0	0.0141061	0	0	0	0.0133348	0	0	0	0.0195508	0.0314032	0	0.0320505	0	0.025627	0.0130152	0	0	0.0241768	0	0	0.0189989	0.0115718	0.0217334
ASV768	Bacteria	Planctomycetota	Unclassified Planctomycetota	0	0	0.0451152	0.0120457	0	0	0	0.0218107	0	0	0.0379759	0	0	0	0.0614565	0	0	0	0	0.0428673	0	0	0	0.033502	0	0	0.0598397	0	0	0	0	0	0	0	0	0	0.0324609	0	0.0324077	0	0.0241768	0	0.0202893	0.0207261	0	0
ASV769	Bacteria	Chloroflexota	Unclassified Chloroflexota	0	0	0	0	0	0	0	0.0158623	0	0.016972	0	0.0300188	0	0	0	0	0	0	0	0	0	0.026522	0	0	0	0	0.0251957	0.0472779	0	0	0	0	0	0	0	0	0	0	0	0.0486618	0.0386828	0	0	0.0259076	0.0452351	0.0386371
ASV770	Bacteria	Unclassified Bacteria	Unclassified Bacteria	0.0159208	0.00678979	0	0	0.0109448	0.0210615	0.0126088	0	0.0142502	0.0254579	0.00569638	0	0.0290664	0.0194767	0	0	0	0.0179054	0.035189	0	0.0133391	0.0192887	0.0381429	0	0.00823882	0	0.0157473	0	0	0	0	0.00920037	0.0120782	0.0164306	0.0263272	0	0	0.00867679	0.0290551	0.0440273	0	0.0166249	0	0.0224533	0	0
ASV771	Bacteria	Bacteroidota	Flavobacteriia	0	0	0	0.179179	0	0	0	0.0237935	0	0	0	0	0	0	0	0	0	0	0	0	0	0	0	0	0	0	0	0	0	0.204074	0	0.049452	0	0	0	0	0	0	0	0	0	0	0	0	0	0
ASV772	Bacteria	Actinomycetota	Unclassified Actinomycetota	0.0331684	0.0193994	0	0	0.0394011	0.0153175	0	0	0.0142502	0	0	0	0.0232531	0	0	0	0.0238834	0.0244164	0.0211134	0	0	0	0	0	0.0343284	0	0	0	0	0	0	0.025301	0.0434814	0.0328612	0.0148806	0	0	0.0144613	0.0257026	0	0	0.0306921	0	0	0	0
ASV773	Bacteria	Pseudomonadota	Gammaproteobacteria	0	0.0252192	0	0	0	0.0287202	0	0.0297418	0.0126668	0.00848598	0.0265831	0.043152	0	0	0	0	0	0	0	0	0	0.0168776	0	0	0	0	0	0.0375799	0	0	0	0	0	0	0	0	0	0	0	0	0	0	0	0	0.0294554	0
ASV774	Bacteria	Unclassified Bacteria	Unclassified Bacteria	0	0	0	0	0	0	0.036025	0	0	0	0	0	0	0	0	0	0	0.0569717	0	0	0	0.0385775	0	0	0	0	0.0803112	0	0	0	0	0	0	0	0	0	0.0290439	0	0.0547578	0.0973236	0.0531889	0	0.0666647	0	0	0
ASV775	Bacteria	Acidobacteriota	Unclassified Acidobacteriota	0	0.0203694	0	0	0	0	0	0.0188365	0	0	0.0199373	0.0375235	0	0	0.0225341	0	0	0.0195332	0	0	0.0192675	0.0361664	0.0211905	0	0	0	0.0362188	0	0	0	0	0	0	0	0.0320505	0	0.0410032	0	0.0223501	0.0602479	0	0	0.0260862	0.0241805	0	0
ASV776	Bacteria	Pseudomonadota	Gammaproteobacteria	0.019901	0	0.0451152	0	0	0.0402083	0.0396275	0	0	0.0351562	0.0284819	0.0469043	0	0	0	0	0	0	0	0	0	0	0	0	0	0	0.034644	0	0	0	0	0.0138006	0	0	0	0.0480894	0.0392947	0	0.0212326	0.0370757	0	0	0	0	0	0
ASV777	Bacteria	Chloroflexota	Chloroflexia	0	0	0.0656222	0	0	0	0	0.0723718	0	0	0	0	0	0	0	0	0	0	0	0.0857347	0	0	0	0	0	0	0	0	0	0	0	0	0	0	0	0.0739836	0.0615048	0	0	0	0.0338475	0	0	0.0880859	0	0
ASV778	Bacteria	Pseudomonadota	Deltaproteobacteria	0	0	0	0	0	0	0	0	0	0	0	0	0	0.133091	0	0	0	0.0537162	0	0	0	0.120555	0	0	0	0	0	0	0.0587769	0	0	0	0.13286	0	0	0	0	0.0650759	0	0	0	0	0	0	0	0
ASV779	Bacteria	Unclassified Bacteria	Unclassified Bacteria	0	0	0.0191398	0	0	0	0	0	0	0.016972	0	0	0	0	0	0	0	0	0	0	0	0	0	0.0317388	0	0	0.0393682	0.0363676	0	0	0	0	0	0	0	0	0	0.00433839	0.0156451	0.0440273	0.0548007	0	0	0.069087	0.046287	0
ASV780	Bacteria	Chloroflexota	Chloroflexia	0.0371486	0.0145495	0	0	0.020795	0.0210615	0	0	0.022167	0.0206088	0	0	0.0348797	0	0	0	0	0.0130221	0	0	0.0177854	0	0	0	0.0192239	0.00907503	0	0	0.0156738	0.0118878	0.0414493	0.0115005	0.0193251	0.0246459	0.010302	0	0	0.0115691	0.0234676	0	0	0.0166249	0	0	0	0
ASV781	Bacteria	Pseudomonadota	Gammaproteobacteria	0	0	0	0.0210799	0	0	0	0.00991395	0	0	0	0.0225141	0	0	0	0	0	0	0	0	0	0	0	0	0	0	0	0.0618249	0	0	0	0	0	0	0	0	0	0	0	0	0.00967071	0	0	0	0.0620667	0.0941779
ASV782	Bacteria	Pseudomonadota	Alphaproteobacteria	0	0	0	0	0	0	0	0	0.00316671	0.0654633	0	0.0150094	0	0.110368	0	0.0790653	0	0.0325553	0	0	0	0.079566	0	0	0	0	0.0488166	0	0	0	0	0	0	0	0.0331952	0	0	0.00289226	0.00782254	0	0.022565	0	0.0782586	0	0	0
ASV783	Bacteria	Candidatus Binatota	Candidatus Binatia	0	0	0	0	0.0317398	0	0	0	0	0	0	0	0.0639461	0	0	0	0.0453786	0	0	0	0	0	0	0	0.0357015	0.0317626	0	0	0.0528992	0.0634015	0.060447	0	0.0289876	0.0246459	0	0	0	0	0	0	0	0.0217402	0	0	0	0
ASV784	Bacteria	Bacteroidota	Unclassified Bacteroidota	0	0	0	0	0	0	0	0	0	0	0	0	0	0	0	0	0	0	0	0	0	0	0	0	0	0	0	0.0254573	0	0	0	0	0	0	0	0	0	0	0	0	0	0	0	0	0.0452351	0.123156
ASV785	Bacteria	Chloroflexota	Chloroflexia	0	0.00484985	0	0.0301141	0	0	0	0.0208193	0	0	0	0	0	0	0.0389225	0	0	0	0	0.0238152	0	0	0	0	0	0	0.0125978	0.0521269	0	0	0	0	0	0	0.010302	0	0	0	0	0	0.0209532	0	0	0.0276348	0.0357673	0.0241482
ASV786	Bacteria	Planctomycetota	Planctomycetia	0	0	0.0136713	0.0286084	0	0.0172321	0	0.032716	0	0	0.0170891	0.0506567	0	0	0.0327768	0.0307476	0	0	0	0	0	0	0	0.0299755	0	0	0.0220462	0.0278818	0	0	0	0	0	0	0	0	0.0205016	0	0	0.0417101	0.0274004	0	0	0.0241805	0.0241955	0
ASV787	Bacteria	Chloroflexota	Chloroflexia	0	0	0	0.0286084	0.0131337	0	0	0.0178451	0	0	0.0199373	0.0337711	0	0	0.0225341	0	0	0	0	0	0	0.0216998	0	0.0229224	0	0.0113438	0	0.0339431	0	0	0	0	0	0	0.0148806	0	0.0290439	0	0.0145276	0.0278067	0.0338475	0	0	0	0	0
ASV788	Bacteria	Pseudomonadota	Unclassified Pseudomonadota	0	0	0	0.0165628	0	0	0	0	0	0	0	0.0300188	0	0	0.0204855	0	0	0	0	0	0	0	0	0.0370285	0	0	0.0236209	0.0254573	0	0	0	0	0	0	0	0.0295935	0.0170847	0	0	0.050979	0.0128943	0	0	0	0.0210396	0.0434667
ASV789	Bacteria	Planctomycetota	Unclassified Planctomycetota	0.025208	0.0300691	0.0341782	0.0376427	0.0175116	0	0	0.0317246	0	0	0	0	0	0	0	0	0	0	0	0	0	0	0	0.0317388	0	0	0.0551155	0	0	0	0	0	0	0	0	0	0.0546709	0	0	0	0.0402946	0	0	0.0310892	0	0
ASV790	Bacteria	Bacillota	Unclassified Bacillota	0	0	0.00546852	0.025597	0	0	0	0.0416386	0	0	0.014241	0.0243902	0	0	0.0430196	0	0	0	0	0.0309598	0	0	0	0.0440816	0	0	0.0204715	0.0193961	0	0	0	0	0	0	0	0.0221951	0.0375863	0	0	0	0.0338475	0	0	0.0466337	0.0199876	0.00482963
ASV791	Bacteria	Pseudomonadota	Deltaproteobacteria	0	0	0	0	0	0	0	0	0	0	0	0	0	0	0	0	0	0.161149	0	0	0	0	0	0	0	0	0	0.105466	0	0	0	0	0	0	0	0	0	0.130152	0	0	0	0	0	0	0	0
ASV792	Bacteria	Chloroflexota	Chloroflexia	0	0.00775976	0.031444	0.0662511	0	0	0	0.0386644	0	0.00969826	0.0189879	0.0356473	0	0	0.0225341	0	0	0	0	0.0190522	0	0	0.0169524	0.0352653	0	0	0.017322	0	0	0	0	0	0	0	0	0	0.0136677	0	0	0	0.0419064	0	0	0.0155446	0.0147277	0
ASV793	Bacteria	Unclassified Bacteria	Unclassified Bacteria	0.019901	0.0106697	0.0164055	0	0	0	0.0180125	0.0128881	0.0126668	0.0278825	0.0170891	0	0	0	0.0163884	0	0.0262718	0.0211609	0	0.0238152	0	0	0.0211905	0.0176326	0	0.0192844	0.0110231	0	0	0.0158504	0	0	0	0.00821531	0.0240379	0	0.025627	0.0130152	0.0145276	0	0.00967071	0	0	0	0	0
ASV794	Bacteria	Chloroflexota	Chloroflexia	0	0	0.0273426	0.025597	0	0	0	0.0138795	0	0	0.0227855	0.0393996	0	0	0.0450681	0	0	0	0.0457457	0	0	0	0	0.0458449	0	0	0.0425177	0	0	0	0	0	0	0	0.0217486	0	0.0717556	0	0	0.0185378	0	0.0102307	0	0.0207261	0	0
ASV795	Bacteria	Pseudomonadota	Gammaproteobacteria	0.0172476	0.0155195	0	0	0.0142282	0.0440377	0.0270188	0	0.0300838	0	0	0	0	0	0	0	0.0238834	0	0	0	0.0118569	0	0	0	0.0178508	0.0238219	0	0	0.0156738	0.00792519	0.0276329	0.0207008	0.026572	0.027932	0	0	0	0.0187997	0.0268201	0	0	0	0.0086954	0	0	0
ASV796	Bacteria	Pseudomonadota	Deltaproteobacteria	0	0.0174595	0.0136713	0	0	0.0191468	0.0234163	0.00793116	0	0	0.0151904	0	0	0	0.0225341	0	0	0.0146499	0	0	0	0.0192887	0.0360238	0	0	0	0.0110231	0.0230328	0	0	0	0	0	0	0	0	0.0136677	0	0.0100576	0	0	0	0	0	0.0157797	0
ASV797	Bacteria	Unclassified Bacteria	Unclassified Bacteria	0	0	0.0246083	0.025597	0	0	0	0.0416386	0	0	0	0.0525328	0	0	0.0327768	0	0	0	0	0	0	0	0	0	0	0	0.0251957	0.0400044	0	0	0	0	0	0	0	0	0.0597964	0	0	0	0.0402946	0	0	0.0224533	0.0294554	0
ASV798	Bacteria	Planctomycetota	Unclassified Planctomycetota	0	0	0	0	0.0186061	0	0	0	0.0285004	0	0	0	0	0	0	0	0	0	0	0	0	0	0	0	0.0260896	0.0283595	0	0	0.043103	0.033682	0.0224517	0	0	0.0328612	0	0	0	0.0375994	0	0	0	0.0920763	0	0	0	0
ASV799	Bacteria	Chloroflexota	Chloroflexia	0	0.00678979	0.0232412	0	0.0109448	0	0.0162113	0	0	0.0121228	0.0246843	0	0	0	0.0204855	0.0307476	0	0.0309275	0	0.0190522	0	0	0.0296667	0	0	0	0.0236209	0	0	0	0	0.0138006	0.0169094	0	0.0297612	0	0.0170847	0	0.0189976	0	0.0338475	0.0204614	0.0260862	0	0	0
ASV800	Bacteria	Chloroflexota	Chloroflexia	0	0	0	0.0150571	0	0	0	0	0	0.0193965	0.0189879	0.0487805	0	0	0	0	0	0	0.0703779	0	0	0	0.0317857	0.0652408	0	0	0	0.0436411	0	0	0	0	0	0	0	0	0	0	0	0	0.0531889	0	0	0.0310892	0.0326113	0.0193185
ASV801	Bacteria	Chloroflexota	Chloroflexia	0	0	0	0.0391484	0	0	0	0.0188365	0	0.0327316	0.0132916	0	0	0	0	0	0	0	0.0914913	0	0	0	0.0360238	0.0705306	0	0	0.0362188	0	0	0	0	0	0	0	0	0	0.0222101	0	0.0335252	0	0.022565	0	0	0.0362707	0	0
ASV802	Bacteria	Pseudomonadota	Unclassified Pseudomonadota	0	0	0.031444	0.0557111	0	0	0	0.0406472	0	0.016972	0.0303807	0	0	0	0.0491652	0	0	0	0	0	0	0	0	0.0387918	0	0	0	0	0	0	0	0	0	0	0	0.0369918	0	0	0	0.030124	0	0	0	0.0259076	0	0.053126
ASV803	Bacteria	Planctomycetota	Planctomycetia	0.0185743	0.0252192	0.0123042	0	0.0164171	0.0229762	0.0126088	0.00793116	0.0126668	0.00848598	0	0	0	0.025969	0	0	0.0143301	0.0146499	0.0422268	0.00714456	0.0148212	0.0120555	0.0148333	0	0.0109851	0	0	0	0	0	0	0.0195508	0	0.0131445	0.0125913	0	0.0136677	0.0115691	0.0111751	0	0.0193414	0.0204614	0.0115939	0	0	0
ASV804	Bacteria	Chloroflexota	Chloroflexia	0	0	0	0.0210799	0	0	0	0.0257763	0	0	0	0.0375235	0	0	0	0	0	0	0	0	0	0	0	0.0158694	0	0	0	0.0303063	0	0	0	0	0	0	0	0	0.0239185	0	0	0	0.0467418	0	0	0	0.0746905	0
ASV805	Bacteria	Pseudomonadota	Unclassified Pseudomonadota	0.0265347	0.0261892	0	0	0.0295508	0	0.0306213	0	0	0	0	0	0	0	0	0	0	0.00976658	0	0	0.0118569	0	0	0	0.020597	0.0249563	0	0	0.0156738	0	0.0155435	0.0310513	0	0.0230029	0.0137359	0	0	0	0.0201151	0	0	0.0281344	0.0202893	0	0	0
ASV806	Bacteria	Chloroflexota	Chloroflexia	0	0	0	0	0	0	0	0.0158623	0	0	0	0	0	0	0	0	0	0	0	0	0	0	0	0.093453	0	0	0	0.071523	0	0	0	0	0	0	0	0	0	0	0	0	0	0	0	0	0.0220915	0.115911
ASV807	Bacteria	Planctomycetota	Unclassified Planctomycetota	0	0	0.0218741	0	0	0.0229762	0	0.0416386	0	0.0145474	0.0569638	0	0	0	0	0	0	0.00813882	0	0	0	0	0.0254286	0.0387918	0	0	0.0377935	0	0	0	0	0	0	0	0.0091573	0	0	0	0.0167626	0.0764685	0	0	0.0173908	0	0	0
ASV808	Bacteria	Unclassified Bacteria	Unclassified Bacteria	0	0	0.0410139	0.0301141	0	0	0	0.0188365	0	0	0.0113928	0.0356473	0	0	0.0143399	0.0263551	0	0	0	0	0	0.0216998	0	0.0352653	0	0	0	0.0569759	0	0	0	0	0	0	0	0.0184959	0.0375863	0	0	0	0.0209532	0	0	0.0207261	0.0241955	0
ASV809	Bacteria	Pseudomonadota	Alphaproteobacteria	0	0	0	0.0526997	0	0	0	0.00991395	0	0	0	0	0	0	0	0	0	0.175798	0	0	0	0	0	0	0	0	0	0.0315186	0	0.0713267	0	0.0299012	0	0	0	0	0	0	0	0	0	0	0	0.039725	0	0
ASV810	Bacteria	Planctomycetota	Unclassified Planctomycetota	0.025208	0.0407387	0	0	0.0328343	0.036379	0.0270188	0	0	0.0327316	0	0	0	0	0	0	0	0.0260442	0	0	0	0.0192887	0	0	0.0137314	0	0	0	0	0	0	0.0310513	0.0120782	0	0.00686797	0	0	0	0.0212326	0	0	0.0153461	0.0231877	0	0	0
ASV811	Bacteria	Bacteroidota	Flavobacteriia	0.019901	0.032009	0	0	0.0175116	0	0	0.00594837	0	0	0	0	0	0	0	0	0.0453786	0	0	0	0	0.0241109	0	0	0	0.0124782	0	0.00969803	0	0	0	0.0161007	0.0338189	0.0246459	0.0434972	0	0.0187931	0.0159074	0	0	0	0	0	0	0	0.0289778
ASV812	Bacteria	Pseudomonadota	Deltaproteobacteria	0	0	0.0191398	0.0210799	0	0	0	0.04263	0	0.0121228	0.0256337	0.0281426	0	0	0.0225341	0.0395326	0	0	0	0.0190522	0	0	0	0.033502	0	0	0.0204715	0.0193961	0	0	0	0	0	0	0	0	0.0273355	0	0	0.0115861	0.0274004	0	0	0.0103631	0.0094678	0
ASV813	Bacteria	Chloroflexota	Chloroflexia	0.0106139	0.0126096	0	0	0.022984	0	0	0	0.0174169	0.0133351	0	0	0	0.0227228	0	0	0.0191068	0	0	0	0.0237139	0.026522	0.0148333	0	0.0178508	0.00907503	0.0125978	0	0.0205719	0.019813	0.0207247	0.0161007	0	0.0213598	0.0217486	0	0	0.0260304	0	0.0139034	0	0.00767303	0	0	0	0
ASV814	Bacteria	Chloroflexota	Chloroflexia	0	0.0116396	0.0300768	0	0.0153227	0.0306349	0	0.0208193	0	0	0.0208867	0	0	0	0	0.0614952	0	0.0260442	0	0.059538	0	0	0	0.0229224	0	0	0	0.00848577	0	0	0	0.0126505	0	0	0.0297612	0	0	0	0	0.0208551	0	0.0127884	0.0405785	0	0.0094678	0
ASV815	Bacteria	Chloroflexota	Chloroflexia	0	0	0.0246083	0.0180685	0	0	0	0.0178451	0	0	0.0180385	0.0281426	0	0	0	0.0571027	0	0	0.0492646	0.0309598	0	0	0.0381429	0	0	0	0.017322	0	0	0	0	0	0	0	0.0125913	0	0.0341693	0	0.00894005	0.0625652	0.0274004	0	0.0782586	0	0	0
ASV816	Bacteria	Planctomycetota	Unclassified Planctomycetota	0	0.00387988	0.0136713	0.0150571	0	0	0	0.0198279	0	0	0.0104434	0.0337711	0	0	0	0.0219626	0	0	0	0.0166706	0	0	0	0.00881632	0	0	0.00629892	0.0278818	0	0	0	0	0	0	0	0	0.0136677	0	0	0	0.0112825	0	0	0.00863588	0.0315593	0.0482963
ASV817	Bacteria	Pseudomonadota	Alphaproteobacteria	0	0.0387988	0	0	0.0404956	0	0	0	0.0665009	0	0	0	0	0	0	0	0	0.0553439	0	0	0	0	0	0	0	0	0	0	0	0	0	0	0	0	0.0686797	0	0	0	0.0525228	0	0	0	0	0	0	0
ASV818	Bacteria	Chloroflexota	Chloroflexia	0	0	0.010937	0.0105399	0	0	0	0.00693976	0	0	0	0.0600375	0	0	0	0	0	0	0	0	0	0	0	0.0141061	0	0	0.0204715	0.0315186	0	0	0	0	0	0	0	0	0.0170847	0	0	0.0185378	0.0241768	0	0	0.0328163	0.046287	0.0386371
ASV819	Bacteria	Unclassified Bacteria	Unclassified Bacteria	0	0	0	0	0	0	0	0.0287504	0	0	0	0.0281426	0	0	0	0.0790653	0	0	0	0	0	0	0	0	0	0	0	0.0509146	0	0	0	0	0	0	0	0	0	0	0	0	0.0338475	0	0	0	0.0715345	0.0482963
ASV820	Bacteria	Planctomycetota	Planctomycetia	0	0	0.0328111	0.0331255	0	0	0	0.0257763	0	0	0.0246843	0.0450281	0	0	0.0225341	0.0483177	0	0	0	0.0333413	0	0	0	0	0	0	0.0188967	0.0290941	0	0	0	0	0	0	0	0	0.0358778	0	0	0	0.0419064	0	0	0.0172718	0.00841583	0
ASV821	Bacteria	Planctomycetota	Planctomycetia	0	0	0.0232412	0.025597	0	0	0	0.0317246	0	0	0.0104434	0	0	0	0.0245826	0.0263551	0	0	0	0.0142891	0	0.0120555	0	0.026449	0	0	0.0330693	0.0266696	0	0	0	0	0	0	0	0.0147967	0.0427117	0	0	0.0370757	0.0322357	0	0	0.0345435	0.0105198	0
ASV822	Bacteria	Planctomycetota	Planctomycetia	0	0	0	0.0195742	0	0	0	0.0456042	0	0	0.0208867	0.043152	0	0	0	0	0	0	0	0	0	0	0	0.0317388	0	0	0	0.0327308	0	0	0	0	0	0	0	0	0.025627	0	0	0	0	0	0	0	0.0326113	0
ASV823	Bacteria	Pseudomonadota	Deltaproteobacteria	0	0	0	0	0	0	0	0	0	0	0	0.043152	0	0	0	0	0	0	0	0	0	0	0	0	0	0	0	0	0	0	0	0	0	0	0	0	0	0	0	0	0	0	0	0	0.0610147	0.111082
ASV824	Bacteria	Acidobacteriota	Unclassified Acidobacteriota	0	0	0.0615208	0.0752853	0	0	0	0	0	0	0.0436723	0	0	0	0	0.0702802	0	0	0	0.0452489	0	0	0	0	0	0	0	0	0	0	0	0	0	0	0	0.0887804	0	0	0	0.0556135	0.0564125	0	0	0	0	0
ASV825	Bacteria	Planctomycetota	Planctomycetia	0	0.0271592	0	0.0120457	0	0.00765873	0.0468325	0	0	0	0	0	0	0	0	0	0	0.0374386	0	0.0142891	0	0.0289331	0	0	0	0	0	0	0	0	0	0.0345014	0	0	0.0274719	0.203455	0.0222101	0	0.00335252	0	0	0.0345286	0	0	0	0
ASV826	Unknown	Unknown	Unknown	0.0159208	0.0184294	0	0	0.020795	0	0	0	0.0237503	0	0	0	0.0290664	0	0	0	0.0143301	0	0	0	0.0148212	0	0	0	0.020597	0.0249563	0	0	0.0264496	0.019813	0.0345411	0.0195508	0.026572	0.0115014	0.0091573	0	0	0.0303688	0	0	0	0.0179037	0	0	0	0
ASV827	Bacteria	Chloroflexota	Chloroflexia	0.0464357	0	0	0	0	0	0	0	0	0	0	0	0.162772	0.0941375	0	0	0	0	0	0	0	0	0	0	0	0.0340314	0	0	0	0.0257569	0	0.0230009	0.0700534	0.0164306	0	0	0	0	0.0357602	0	0	0.039644	0	0	0	0
ASV828	Bacteria	Chloroflexota	Chloroflexia	0	0	0.0205069	0.0286084	0	0	0	0.0138795	0	0	0.0104434	0	0	0	0	0	0	0.0146499	0	0.0381043	0	0	0	0.0211592	0	0	0.0220462	0.0460656	0	0	0	0	0	0	0.0137359	0.0332926	0.025627	0	0	0.0185378	0.0338475	0	0	0.0259076	0.0294554	0
ASV829	Bacteria	Pseudomonadota	Deltaproteobacteria	0.025208	0.0184294	0.0095699	0	0.0142282	0.0229762	0.0342238	0	0	0.0242457	0.0151904	0	0	0	0.00614565	0	0	0.0146499	0.0316701	0	0	0.0409885	0.0233095	0	0.00823882	0	0	0	0	0	0	0.0172507	0	0	0.0114466	0	0	0	0.0290551	0	0	0.0242979	0	0.00863588	0	0
ASV830	Bacteria	Chloroflexota	Chloroflexia	0	0	0	0	0	0	0	0	0	0.0715247	0	0	0	0.152568	0.133156	0	0	0.0976658	0	0.0500119	0	0	0	0	0	0	0	0	0	0	0	0	0	0	0	0	0	0	0	0	0	0	0	0	0.00315593	0
ASV831	Bacteria	Spirochaetota	Spirochaetia	0	0.0184294	0	0	0.0153227	0.0325496	0	0	0.0158336	0	0	0	0	0	0.0368739	0	0	0.0292997	0	0.0261967	0	0.0433996	0.0317857	0	0.030209	0	0	0	0	0.0178317	0	0.024151	0.0144938	0.027932	0	0	0	0.0130152	0	0	0	0.0179037	0	0.029362	0	0
ASV832	Bacteria	Pseudomonadota	Alphaproteobacteria	0	0.0213393	0	0	0	0.0191468	0.01441	0	0	0.0145474	0	0	0	0	0	0	0	0.0244164	0	0	0.0177854	0	0.0254286	0.0141061	0.00823882	0	0.017322	0.0278818	0.0068573	0	0	0.00690028	0	0	0.0171699	0	0.00683387	0.0115691	0.0346427	0.00695169	0	0	0	0.0155446	0.0178836	0.0193185
ASV833	Bacteria	Acidobacteriota	Unclassified Acidobacteriota	0	0	0.0341782	0.0225856	0	0	0	0.0237935	0	0	0.0351277	0.0243902	0	0	0.0368739	0.0702802	0	0	0	0.0238152	0	0	0	0.0511347	0	0	0.0251957	0	0	0	0	0	0	0	0	0	0.0273355	0	0	0.0231723	0.0161179	0	0	0.0259076	0	0
ASV834	Bacteria	Acidobacteriota	Unclassified Acidobacteriota	0	0	0	0	0	0	0	0	0	0	0	0	0	0	0	0	0	0	0	0	0.037053	0	0	0	0.050806	0.0555845	0	0	0	0	0	0	0.0652221	0.027932	0.0446418	0.0443902	0	0	0	0	0	0.0613842	0	0	0	0
ASV835	Bacteria	Planctomycetota	Phycisphaerae	0.0225545	0.032979	0	0	0	0	0	0	0	0	0.0123422	0	0	0	0	0	0	0	0	0	0	0	0	0	0	0.0385689	0	0	0	0	0	0.0230009	0.0386501	0.0197167	0.0423525	0	0	0.0433839	0.0234676	0	0	0	0.0579693	0	0	0
ASV836	Bacteria	Unclassified Bacteria	Unclassified Bacteria	0.0145941	0.0213393	0.00546852	0	0.0240785	0.0134028	0.0162113	0	0.0110835	0.016972	0.00569638	0	0	0.0162306	0	0	0.0214951	0	0	0	0.0118569	0	0.0169524	0	0.0260896	0.0192844	0	0	0.0068573	0.0178317	0.0120894	0.0149506	0	0	0.010302	0	0	0.0173536	0.0145276	0	0	0.0191826	0	0	0	0
ASV837	Bacteria	Chloroflexota	Chloroflexia	0	0	0	0.0301141	0	0.0191468	0.0198138	0.0267677	0	0.00848598	0.0237349	0.0150094	0	0	0.0553109	0	0	0	0	0.0261967	0	0	0.0148333	0.0299755	0	0	0.0125978	0.0133348	0	0	0	0	0	0	0	0	0.0153762	0	0.0167626	0.030124	0.0241768	0	0	0.0207261	0	0
ASV838	Bacteria	Unclassified Bacteria	Unclassified Bacteria	0	0	0.010937	0	0.0109448	0	0	0.00495697	0.0253337	0	0	0	0	0	0.0122913	0	0.0214951	0.0211609	0	0	0.0340887	0	0	0	0.0164776	0.0238219	0	0	0.0166534	0.0237756	0	0.0149506	0.0169094	0.0115014	0.0263272	0	0.0136677	0	0.0100576	0	0	0.0153461	0.0405785	0.0138174	0	0
ASV839	Bacteria	Pseudomonadota	Unclassified Pseudomonadota	0	0	0	0	0	0	0	0	0	0	0	0.0581614	0	0	0	0.0614952	0	0.0146499	0	0	0	0	0	0	0	0	0.0362188	0.0775842	0	0	0	0	0	0	0	0	0.0751726	0	0	0	0.0257886	0	0	0	0.0389232	0
ASV840	Bacteria	Pseudomonadota	Alphaproteobacteria	0	0.0232793	0.0451152	0	0	0.0382936	0	0	0	0.0290948	0.0313301	0	0	0	0	0	0	0	0.035189	0	0	0.0409885	0	0	0	0	0.0299198	0	0	0	0	0	0	0	0	0.0443902	0.0324609	0	0.0167626	0	0	0	0	0.0431794	0	0
ASV841	Bacteria	Pseudomonadota	Alphaproteobacteria	0	0.00775976	0	0.0165628	0	0.0172321	0	0.0346988	0	0.0157597	0.0246843	0.0262664	0	0	0.018437	0	0	0	0	0.0238152	0	0	0	0.0387918	0	0	0.0299198	0.0169715	0	0	0	0	0	0	0.0240379	0	0.0273355	0	0	0	0.022565	0	0	0	0.0105198	0
ASV842	Bacteria	Unclassified Bacteria	Unclassified Bacteria	0.0318416	0.0387988	0	0	0	0.0248909	0	0	0.0142502	0.0278825	0	0	0	0	0	0	0.0334368	0.0227887	0	0	0.0222318	0	0	0	0.0219702	0.0363001	0	0	0	0	0	0.0172507	0	0	0	0	0	0	0.0178801	0	0	0.0255768	0	0	0	0
ASV843	Bacteria	Planctomycetota	Planctomycetia	0	0	0.0246083	0.0195742	0	0	0	0.0664234	0	0	0.0332289	0	0	0	0	0.0658877	0	0	0	0	0	0	0	0	0	0	0.0251957	0.0315186	0	0	0	0	0	0	0	0	0.0751726	0	0	0	0	0	0	0	0.0178836	0
ASV844	Bacteria	Planctomycetota	Unclassified Planctomycetota	0	0.0387988	0	0	0	0.0229762	0	0	0.0190003	0.0436422	0	0	0	0.0227228	0	0	0	0.0195332	0	0	0.0207497	0.0241109	0	0	0.0288359	0	0	0	0	0	0	0.0195508	0.0217407	0	0.0286166	0	0	0	0.0301727	0	0	0.0102307	0	0	0	0
ASV845	Bacteria	Planctomycetota	Planctomycetia	0	0	0	0	0	0	0	0	0	0	0	0	0	0	0	0	0	0	0	0	0	0	0	0	0	0	0	0	0	0	0	0	0	0	0	0	0	0	0	0	0	0	0	0	0	0
ASV846	Bacteria	Pseudomonadota	Deltaproteobacteria	0	0.0436486	0	0	0	0.0459524	0.0522363	0	0.0190003	0	0.0170891	0	0	0	0	0	0	0	0	0.0261967	0	0.0192887	0.0254286	0.0246857	0	0	0	0	0	0	0	0.0138006	0	0	0.0228932	0	0	0	0.0279376	0.0231723	0	0	0.0289847	0	0	0
ASV847	Bacteria	Pseudomonadota	Alphaproteobacteria	0	0.0203694	0.00410139	0	0	0.0593551	0.0252175	0	0	0	0.00474699	0.0187617	0	0	0	0	0	0.0211609	0	0	0.0177854	0	0	0.0246857	0.0123582	0	0.0314946	0.0303063	0	0	0	0.0195508	0	0	0	0	0.0187931	0	0.0178801	0	0	0	0	0	0.0136757	0
ASV848	Unknown	Unknown	Unknown	0	0	0.0164055	0.0120457	0	0	0.0162113	0.0138795	0	0.016972	0.0161398	0.00562852	0	0	0.0081942	0.0351401	0	0	0.0281512	0.0142891	0	0	0.0254286	0.0211592	0	0	0.017322	0.0290941	0	0	0	0	0	0	0	0.0295935	0	0	0.0201151	0.0115861	0.0145061	0	0	0.00863588	0.0189356	0
ASV849	Bacteria	Chloroflexota	Chloroflexia	0.0398021	0	0	0	0	0	0	0	0	0	0	0	0	0	0	0	0	0	0	0	0.0726238	0	0	0	0.0466866	0.0442408	0	0	0.043103	0.0297194	0.0328141	0	0	0	0	0	0	0.0260304	0	0	0	0	0	0	0	0
ASV850	Bacteria	Pseudomonadota	Alphaproteobacteria	0	0	0	0	0	0	0	0.0218107	0	0	0	0.0281426	0	0	0	0	0	0	0	0	0	0	0	0.0193959	0	0	0.0377935	0.0460656	0	0	0	0	0	0	0	0	0.0444201	0	0	0	0	0	0	0	0.0305074	0.0482963
ASV851	Bacteria	Pseudomonadota	Deltaproteobacteria	0	0.0417087	0.0232412	0	0	0.036379	0	0	0	0.0315194	0.0303807	0	0	0	0.0389225	0	0	0	0	0.0500119	0	0.026522	0.0360238	0	0	0.0226876	0	0	0	0	0	0	0	0	0	0	0	0	0.0167626	0.0185378	0	0	0	0	0	0
ASV852	Bacteria	Pseudomonadota	Deltaproteobacteria	0	0	0.0205069	0.0376427	0	0	0	0.00991395	0	0	0.0227855	0.011257	0	0	0.0430196	0.0395326	0	0	0	0.0404858	0	0	0	0.0158694	0	0	0.0157473	0.014547	0	0	0	0	0	0	0	0.0369918	0.0273355	0	0	0.0162206	0.0112825	0	0	0.0241805	0.00736385	0.0169037
ASV853	Bacteria	Acidobacteriota	Unclassified Acidobacteriota	0	0	0	0	0	0	0	0.0247849	0	0	0.0161398	0.0525328	0	0	0.0368739	0	0	0	0	0	0	0	0	0.0758204	0	0	0.0393682	0.0497024	0	0	0	0	0	0	0	0	0.0495455	0	0	0	0	0	0	0.0362707	0	0
ASV854	Bacteria	Acidobacteriota	Unclassified Acidobacteriota	0	0	0	0	0	0	0	0	0	0	0	0	0	0	0	0	0	0	0	0	0	0	0	0	0	0	0	0.0606127	0	0	0	0	0	0	0	0	0	0	0	0	0	0	0	0	0.0410272	0.0965927
ASV855	Bacteria	Chloroflexota	Chloroflexia	0	0.0281291	0	0	0	0	0.0324225	0	0	0	0.0227855	0	0	0	0	0	0	0.0683661	0	0	0.0518741	0.0554551	0	0	0	0	0	0	0	0	0.0224517	0	0	0	0.0480758	0	0	0	0	0	0	0	0.0608678	0	0	0
ASV856	Bacteria	Pseudomonadota	Gammaproteobacteria	0.0225545	0	0	0.137019	0	0	0	0.0188365	0	0	0	0.011257	0	0	0	0.0395326	0	0	0	0.0142891	0	0.00723327	0	0	0	0	0	0	0	0.00792519	0	0.0264511	0	0	0	0	0	0	0	0	0	0.0294133	0.0405785	0	0	0.0748593
ASV857	Bacteria	Chloroflexota	Chloroflexia	0	0.0611081	0	0	0	0.0880754	0	0	0	0	0	0	0	0	0	0	0	0	0.147794	0	0.0163033	0	0	0	0	0	0	0	0	0	0	0	0.099041	0	0.0492205	0	0	0	0	0	0	0	0	0	0	0
ASV858	Bacteria	Unclassified Bacteria	Unclassified Bacteria	0	0	0.0123042	0	0	0	0	0.0297418	0	0	0.0465205	0.0712946	0	0	0.0204855	0	0	0	0	0.0619195	0	0	0	0.0229224	0	0	0.0362188	0	0	0	0	0	0	0	0	0	0.0375863	0	0	0.0231723	0.0257886	0	0	0	0	0
ASV859	Bacteria	Chloroflexota	Chloroflexia	0	0.0145495	0.0095699	0	0	0	0	0.0208193	0	0	0	0.0337711	0	0	0.018437	0	0	0.0146499	0.0281512	0.0285782	0	0	0	0.033502	0	0	0.0283451	0.014547	0	0	0	0	0	0	0.0114466	0	0	0	0.0134101	0	0	0.00767303	0	0	0.0326113	0.0241482
ASV860	Unknown	Unknown	Unknown	0	0	0.0123042	0.061734	0	0	0	0.0168537	0	0	0	0.0525328	0	0	0	0	0	0	0	0	0	0	0	0.0141061	0	0	0.0141726	0.0327308	0	0	0	0	0	0	0	0	0.0222101	0	0	0	0.0322357	0	0	0.0259076	0.0410272	0.00965927
ASV861	Bacteria	Unclassified Bacteria	Unclassified Bacteria	0	0.0145495	0.0287097	0	0.0153227	0	0.0306213	0.00793116	0	0.0339439	0.0104434	0	0	0	0.0204855	0	0	0.0146499	0	0	0.0133391	0	0	0	0	0	0.0220462	0	0.00783691	0	0	0.00920037	0	0.0230029	0.0148806	0	0.0205016	0	0.00894005	0	0	0.0268556	0	0	0.00525989	0
ASV862	Bacteria	Pseudomonadota	Deltaproteobacteria	0.0371486	0.0145495	0	0	0.0142282	0	0	0	0.0190003	0.0121228	0	0	0.0697593	0	0	0	0	0	0	0	0	0	0	0	0.0164776	0.0170157	0	0	0.0293884	0.0356633	0.0276329	0.0184007	0.0120782	0.0147876	0	0	0	0.0173536	0.0100576	0	0	0.0166249	0	0	0	0
ASV863	Bacteria	Chloroflexota	Dehalococcoidia	0	0.0193994	0	0	0	0	0	0	0	0	0.0408241	0.0262664	0	0	0	0	0	0	0	0.0738271	0	0	0	0	0	0	0.058265	0	0	0	0	0	0	0	0	0	0.0495455	0	0.0134101	0	0.0467418	0	0	0.0518153	0	0
ASV864	Unknown	Unknown	Unknown	0	0.0106697	0.00820277	0	0.0109448	0.036379	0.0108075	0	0.00633342	0	0	0	0	0.0292151	0	0	0.0214951	0.0195332	0	0	0	0.0337553	0.0127143	0	0.00411941	0.0272251	0	0	0.0176331	0	0	0.0103504	0.0314032	0.0213598	0.0194593	0	0	0.0115691	0.0156451	0	0	0.0191826	0.0115939	0	0	0
ASV865	Bacteria	Unclassified Bacteria	Unclassified Bacteria	0	0	0.0232412	0.0105399	0	0	0.0252175	0.0158623	0	0	0.0303807	0.0243902	0	0	0.0450681	0	0	0	0	0.0238152	0	0	0	0.0193959	0	0	0.0188967	0.0193961	0	0	0	0	0	0	0	0.0295935	0.025627	0	0	0.0278067	0.0386828	0	0	0.0155446	0.00631187	0
ASV866	Bacteria	Planctomycetota	Unclassified Planctomycetota	0.0159208	0.0387988	0	0	0.00547238	0	0.050435	0	0	0.0254579	0.0104434	0	0	0	0.0450681	0	0	0	0	0	0	0	0	0	0	0.00907503	0.0740123	0	0.00293884	0.0118878	0.0172706	0	0	0	0	0	0	0	0.0335252	0	0	0	0	0	0	0
ASV867	Bacteria	Pseudomonadota	Alphaproteobacteria	0	0	0	0	0	0	0	0.0485783	0	0	0.0104434	0	0	0	0.0225341	0	0	0	0	0	0	0	0	0.033502	0	0	0.034644	0.0424289	0	0	0	0	0	0	0	0	0.0529625	0	0	0	0.0274004	0	0	0	0	0
ASV868	Bacteria	Chloroflexota	Unclassified Chloroflexota	0	0.0174595	0.0205069	0	0	0.0210615	0	0.0138795	0.00950013	0.0218211	0.0151904	0	0	0	0	0	0	0.0390663	0.0246323	0	0	0.0241109	0.0211905	0	0	0	0.0409429	0	0	0	0	0.0115005	0	0	0.0148806	0	0	0	0	0.030124	0.0145061	0	0	0.0362707	0	0
ASV869	Bacteria	Acidobacteriota	Unclassified Acidobacteriota	0.00663368	0.0252192	0	0	0	0.00957341	0.021615	0	0	0.0157597	0.0113928	0	0	0.0227228	0.018437	0	0	0.0162776	0	0.0261967	0	0.026522	0.0190714	0	0.00823882	0.00680627	0.0314946	0	0	0	0	0	0.0193251	0.00985837	0.0217486	0	0	0	0.0279376	0	0	0.0140672	0.0289847	0	0	0
ASV870	Bacteria	Verrucomicrobiota	Unclassified Verrucomicrobiota	0	0	0	0	0	0	0	0	0	0	0	0	0	0	0	0	0	0	0	0	0	0	0	0	0	0.0680627	0	0	0.0333069	0.148597	0	0	0	0	0	0	0	0.104121	0	0	0	0	0	0	0	0
ASV871	Archaea	Methanobacteriota	Unclassified Methanobacteriota	0	0	0.010937	0.0286084	0	0	0	0.0218107	0	0	0.00664578	0.0487805	0	0	0	0	0	0	0	0	0	0	0	0	0	0	0.00629892	0.0509146	0	0	0	0	0	0	0	0	0.0239185	0	0.00223501	0.00463446	0.022565	0	0	0	0.050495	0.0217334
ASV872	Bacteria	Rhodothermota	Rhodothermia	0	0	0	0.0150571	0	0	0	0.0594837	0	0	0	0.0356473	0	0	0	0	0	0.0813882	0	0.0762086	0	0.0506329	0	0	0	0	0	0	0	0.0317007	0	0.0264511	0	0	0	0	0	0	0	0	0.0128943	0	0	0	0	0
ASV873	Bacteria	Acidobacteriota	Terriglobia	0	0	0	0	0.020795	0.0593551	0.036025	0	0.0190003	0	0.0113928	0	0	0.0324612	0	0	0	0.0358108	0.0457457	0	0	0.0241109	0	0	0.0123582	0	0.0141726	0	0	0	0	0.025301	0	0	0.0320505	0	0	0	0.0156451	0	0	0	0.0231877	0	0	0
ASV874	Bacteria	Chloroflexota	Chloroflexia	0	0	0	0	0.0240785	0	0	0	0.026917	0	0	0	0	0	0	0	0	0	0	0	0.0355708	0	0	0	0.0164776	0.0340314	0	0	0.0293884	0.0178317	0.0259058	0.0184007	0.0386501	0.0345043	0	0	0	0.0231381	0	0	0	0.0140672	0	0	0	0
ASV875	Bacteria	Planctomycetota	Unclassified Planctomycetota	0.0318416	0.0164895	0	0	0.0164171	0	0	0	0.0190003	0	0	0	0	0	0	0	0	0.0227887	0	0	0.0296424	0	0	0	0.0109851	0.0249563	0	0	0.0166534	0	0.0224517	0.0218509	0	0	0.00801264	0	0	0.0289226	0.00782254	0	0	0.0294133	0	0	0	0
ASV876	Archaea	Methanobacteriota	Unclassified Methanobacteriota	0.0238812	0.0164895	0	0	0.0262674	0	0	0	0.0237503	0	0	0	0.0348797	0	0	0	0.0262718	0.0113943	0	0	0.0222318	0	0	0	0.020597	0.0260907	0	0	0.0186127	0	0.0259058	0.0149506	0	0	0	0	0	0.0347072	0	0	0	0.0204614	0	0	0	0
ASV877	Bacteria	Pseudomonadota	Deltaproteobacteria	0.0145941	0.0116396	0	0	0.0142282	0.0134028	0	0	0	0	0.0189879	0	0	0	0	0	0.0310485	0.0211609	0	0.0190522	0.0177854	0	0.0169524	0	0	0	0	0.0230328	0	0	0	0	0	0	0.0125913	0	0	0	0.0178801	0	0	0	0	0.0310892	0.0094678	0.0313926
ASV878	Bacteria	Planctomycetota	Unclassified Planctomycetota	0	0	0.0492166	0.0481826	0	0	0	0.0634493	0	0	0	0.0581614	0	0	0	0	0	0	0	0	0	0	0	0.0458449	0	0	0.0409429	0.0278818	0	0	0	0	0	0	0	0	0	0	0	0	0	0	0	0	0	0
ASV879	Bacteria	Bacteroidota	Unclassified Bacteroidota	0.0331684	0.0155195	0.0205069	0.0150571	0	0.0172321	0.0270188	0	0.0253337	0.0327316	0.0227855	0	0	0	0	0	0	0	0.0316701	0.0142891	0	0.0337553	0	0	0	0	0	0	0	0	0	0.0345014	0	0	0.0114466	0	0	0	0.0122926	0	0	0	0	0	0	0
ASV880	Bacteria	Chloroflexota	Chloroflexia	0	0	0.0355453	0.0150571	0	0	0	0.0277591	0	0	0.00379759	0.0487805	0	0	0.0245826	0.0219626	0	0	0	0.0261967	0	0	0	0	0	0	0	0.0303063	0	0	0	0	0	0	0	0	0.0273355	0	0	0.0185378	0.0354593	0	0	0.0207261	0.0147277	0
ASV881	Bacteria	Pseudomonadota	Deltaproteobacteria	0	0	0.0259754	0	0	0	0	0	0	0	0	0	0	0	0	0	0	0	0	0	0	0	0.0148333	0.026449	0	0	0.0157473	0.0509146	0	0	0	0	0	0	0	0	0.025627	0	0	0.0231723	0	0	0	0.0259076	0.0767944	0.0748593
ASV882	Bacteria	Pseudomonadota	Unclassified Pseudomonadota	0	0	0	0	0	0	0	0	0.0617509	0	0	0	0	0	0	0	0	0	0	0	0	0	0	0	0	0.0272251	0	0	0.0675934	0	0.0690822	0.0517521	0	0	0	0	0	0.0289226	0	0	0	0	0	0	0	0
ASV883	Bacteria	Pseudomonadota	Deltaproteobacteria	0.0530694	0	0.0273426	0.0240913	0	0	0	0.0247849	0	0	0.0284819	0	0	0	0.0327768	0	0	0	0	0.0571565	0	0	0	0	0	0	0	0	0	0	0	0	0	0	0	0.0591869	0	0.0433839	0	0	0	0	0	0.0328163	0	0
ASV884	Bacteria	Planctomycetota	Planctomycetia	0	0.0155195	0.0150384	0	0	0.0134028	0.0468325	0	0	0.0521282	0.0284819	0	0	0.0292151	0	0	0	0	0.0211134	0	0	0.0361664	0.0360238	0	0	0	0	0	0	0	0	0	0	0	0.0251826	0	0	0	0.0167626	0	0.0193414	0	0.0173908	0	0	0
ASV885	Bacteria	Chloroflexota	Chloroflexia	0	0	0.0300768	0.0120457	0	0.0325496	0.0306213	0.00793116	0	0.0181842	0.0104434	0	0	0.0227228	0.0102428	0	0	0	0	0	0	0	0.0275476	0	0.0123582	0	0.00787364	0	0	0	0	0.00805033	0	0	0.0160253	0.0332926	0.0170847	0	0.0324077	0	0.0128943	0.0115095	0.0347816	0	0	0
ASV886	Bacteria	Pseudomonadota	Alphaproteobacteria	0	0	0	0.0782967	0	0	0	0	0	0	0	0.0206379	0	0.00649224	0	0	0	0.0113943	0	0	0	0	0	0	0	0	0	0	0	0.0317007	0	0.00690028	0	0	0	0	0	0	0	0	0.0193414	0	0.373902	0	0	0
ASV887	Bacteria	Actinomycetota	Unclassified Actinomycetota	0	0	0.0150384	0.0165628	0	0	0.0108075	0.0228021	0	0	0.00569638	0.0281426	0	0	0.0245826	0.0175701	0	0	0	0	0	0.0144665	0	0.0176326	0	0	0.00944837	0.0266696	0	0	0	0	0	0	0	0.0295935	0.0290439	0	0	0.0324412	0.0370711	0	0.0260862	0.0172718	0.0189356	0
ASV888	Bacteria	Chloroflexota	Dehalococcoidia	0	0.0213393	0.0505838	0	0	0	0.0234163	0.0228021	0	0	0	0.0168856	0	0	0.0204855	0.0614952	0	0	0	0	0	0	0.0169524	0.0211592	0	0	0	0	0	0	0	0	0	0.0115014	0.0217486	0	0.025627	0	0	0.0347584	0.022565	0	0	0	0	0
ASV889	Bacteria	Verrucomicrobiota	Unclassified Verrucomicrobiota	0.0490892	0	0	0	0.0218895	0	0	0	0	0	0	0	0	0	0	0	0.0358252	0	0	0	0.0237139	0	0	0	0	0.0181501	0	0	0.0362457	0	0.0397223	0	0.0338189	0.0147876	0.0125913	0	0	0.033261	0	0	0	0.0153461	0	0	0	0
ASV890	Bacteria	Planctomycetota	Planctomycetia	0	0	0	0	0	0	0	0	0	0	0	0.0675422	0	0	0	0	0	0	0	0	0	0	0	0	0	0	0	0.0787965	0	0	0	0	0	0	0	0	0	0	0	0	0	0	0	0	0.0778464	0
ASV891	Bacteria	Unclassified Bacteria	Unclassified Bacteria	0.0437823	0.0261892	0	0	0.0240785	0	0	0	0.026917	0	0	0	0.0290664	0	0	0	0.0214951	0	0	0	0.0266781	0	0	0	0.020597	0.0124782	0	0	0.0107758	0.0118878	0	0.0218509	0	0.0131445	0	0	0	0.0245842	0	0	0	0.0179037	0	0	0	0
ASV892	Bacteria	Planctomycetota	Unclassified Planctomycetota	0	0	0.0218741	0.0271027	0	0	0	0.0337074	0	0	0.0237349	0.0150094	0	0	0.0532623	0	0	0	0	0.0381043	0	0	0	0.0317388	0	0	0	0.00848577	0	0	0	0	0	0	0	0	0.0495455	0	0	0	0.0322357	0	0	0.0259076	0	0
ASV893	Bacteria	Chloroflexota	Chloroflexia	0.0132674	0.0145495	0	0	0	0	0	0	0.022167	0	0	0	0	0	0	0	0.0334368	0	0	0	0.0133391	0	0	0	0	0.0192844	0	0	0.0215515	0.0455698	0.02936	0.0368015	0.0120782	0.054221	0	0	0	0.0187997	0	0	0	0.0102307	0	0	0	0
ASV894	Bacteria	Chloroflexota	Chloroflexia	0	0	0.0177727	0.0225856	0	0	0	0.0366816	0	0.0109105	0.0113928	0	0	0	0.0286797	0.0395326	0	0	0	0	0	0	0	0.0158694	0	0	0.00944837	0.0315186	0	0	0	0	0	0	0.0114466	0	0.0341693	0	0.0145276	0	0	0	0	0.0328163	0.0199876	0
ASV895	Bacteria	Pseudomonadota	Gammaproteobacteria	0	0	0	0	0	0	0	0.00495697	0	0	0	0	0	0	0	0	0.0286601	0	0	0	0	0	0	0	0	0	0	0	0	0	0	0	0	0	0	0	0	0	0	0	0.0274004	0	0.15072	0.103631	0.0210396	0.144889
ASV896	Unknown	Unknown	Unknown	0	0	0.0246083	0.0331255	0	0.0114881	0	0.0228021	0	0.0181842	0.0303807	0.0206379	0	0	0.0143399	0	0	0	0	0.0238152	0	0	0.0148333	0	0	0	0	0.0157593	0	0	0	0	0	0	0	0	0.0290439	0	0	0.0440273	0.0322357	0	0	0	0.0105198	0
ASV897	Bacteria	Unclassified Bacteria	Unclassified Bacteria	0	0	0.0205069	0.0331255	0	0	0	0.0396558	0	0	0.0189879	0	0	0	0.0307283	0	0	0	0	0.0214337	0	0	0	0.0193959	0	0	0	0.0230328	0	0	0	0	0	0	0	0	0.0205016	0	0	0.0254895	0.0193414	0	0	0.0138174	0.0378712	0
ASV898	Bacteria	Chloroflexota	Chloroflexia	0	0	0	0	0	0	0	0.0307332	0	0	0.0227855	0.0262664	0	0	0	0	0	0	0	0	0	0	0	0.0299755	0	0	0	0.0666739	0	0	0	0	0	0	0	0.040691	0.0239185	0	0	0.0278067	0.0274004	0	0	0	0.0231435	0
ASV899	Bacteria	Planctomycetota	Unclassified Planctomycetota	0	0.0145495	0	0	0	0	0	0.0237935	0.00633342	0.0193965	0	0	0	0	0	0	0	0	0	0	0.0222318	0	0	0.026449	0.0123582	0	0.0204715	0.0363676	0	0	0	0	0	0	0	0	0	0	0.0145276	0	0	0	0	0	0.0410272	0.0338074
ASV900	Bacteria	Pseudomonadota	Gammaproteobacteria	0	0	0	0	0.0240785	0.0210615	0.0252175	0	0	0	0	0	0.0406929	0.0292151	0	0	0.0358252	0.0179054	0	0	0.0266781	0	0	0	0.0164776	0.0238219	0	0	0.0264496	0.0376446	0	0	0	0.0246459	0.0160253	0	0	0.021692	0	0	0	0	0	0	0	0
ASV901	Bacteria	Pseudomonadota	Gammaproteobacteria	0.0265347	0.0145495	0	0	0.0175116	0.0268055	0.0180125	0	0.0158336	0.00606141	0	0	0	0	0	0	0.0214951	0.0146499	0	0.0166706	0	0	0	0	0.0178508	0.0158813	0	0	0.00979614	0	0.0103623	0.0115005	0	0.0147876	0.0183146	0	0	0.0173536	0.00782254	0	0	0.0140672	0.0173908	0	0	0
ASV902	Bacteria	Pseudomonadota	Alphaproteobacteria	0	0.0494685	0	0	0	0.112966	0	0	0	0	0	0	0	0	0	0	0	0	0	0	0	0	0	0	0	0	0	0	0	0	0	0.0793532	0	0	0	0	0	0	0.0558753	0	0	0	0	0	0	0
ASV903	Bacteria	Planctomycetota	Unclassified Planctomycetota	0	0.0252192	0.0355453	0	0	0.0325496	0.0180125	0	0	0.0375808	0.0265831	0	0	0	0.0143399	0	0	0.0211609	0	0.0190522	0	0	0	0.0193959	0	0	0	0	0	0	0	0	0	0	0	0.0443902	0.0187931	0	0.0178801	0.00926891	0.00805893	0	0	0.0069087	0	0
ASV904	Bacteria	Chloroflexota	Chloroflexia	0	0	0	0.00903424	0	0	0.0198138	0	0.022167	0	0.0246843	0	0	0	0.0430196	0	0	0.0455774	0	0	0.0177854	0.0289331	0	0	0	0	0	0	0	0	0	0	0	0	0.0217486	0	0	0	0.0178801	0.0231723	0.0290121	0.0115095	0.0579693	0.0120902	0	0
ASV905	Bacteria	Chloroflexota	Chloroflexia	0	0	0	0	0	0.0306349	0	0	0	0	0	0.0581614	0	0	0	0	0	0	0	0	0	0	0.0762857	0.0423183	0.0178508	0	0.0629892	0	0	0	0	0	0	0	0	0	0	0	0	0	0.0419064	0	0	0.0742685	0	0
ASV906	Bacteria	Chloroflexota	Chloroflexia	0	0.0300691	0.0287097	0	0	0.0287202	0	0	0.0158336	0	0.0313301	0	0	0	0	0	0	0.0244164	0	0	0	0.0506329	0	0	0	0	0	0	0	0	0	0	0	0	0	0	0	0	0.0234676	0.0347584	0	0.0191826	0	0.0535424	0	0
ASV907	Bacteria	Planctomycetota	Unclassified Planctomycetota	0	0	0.0232412	0.0225856	0	0	0	0.0287504	0	0	0	0.0712946	0	0	0	0	0	0	0	0	0	0	0	0	0	0	0	0.0497024	0	0	0	0	0	0	0	0	0.0410032	0	0	0	0.0274004	0	0	0	0.049443	0
ASV908	Bacteria	Planctomycetota	Planctomycetia	0	0	0	0.051194	0	0	0	0.0684062	0	0	0	0.103189	0	0	0	0	0	0	0	0	0	0	0	0.0387918	0	0	0	0	0	0	0	0	0	0	0	0	0	0	0	0	0	0	0	0	0.050495	0
ASV909	Bacteria	Planctomycetota	Unclassified Planctomycetota	0	0	0	0	0	0	0	0	0	0	0	0	0	0	0	0	0	0	0	0	0	0	0	0	0	0	0	0.0327308	0	0	0	0	0	0	0	0	0	0	0	0	0	0	0	0.0224533	0.0399752	0.123156
ASV910	Bacteria	Candidatus Poribacteriota	Unclassified candidatus Poribacteriota	0.0331684	0	0	0	0.0120392	0	0	0	0	0	0	0	0	0	0	0	0	0	0	0	0	0	0	0	0	0.051047	0	0	0.068573	0.053495	0.060447	0	0	0.0230029	0	0	0	0	0	0	0	0	0	0	0	0
ASV911	Bacteria	Planctomycetota	Unclassified Planctomycetota	0	0	0.0751921	0.0496883	0	0	0	0.0317246	0	0	0.0265831	0	0	0	0	0	0	0	0	0	0	0	0	0	0	0	0	0	0	0	0	0	0	0	0	0.0480894	0.0785895	0	0	0	0	0	0	0.0345435	0	0
ASV912	Bacteria	Chloroflexota	Chloroflexia	0.0305149	0	0	0	0.0186061	0	0	0	0	0	0	0	0.0581328	0	0	0	0.0262718	0	0	0	0.0340887	0	0	0	0.0480598	0.0249563	0	0	0.038205	0.019813	0	0	0	0.0180737	0	0	0	0.0375994	0	0	0	0	0	0	0	0
ASV913	Bacteria	Planctomycetota	Planctomycetia	0	0.0164895	0	0	0.0186061	0	0	0	0.0110835	0	0	0	0	0	0	0	0.0286601	0	0	0	0	0	0	0	0.0329553	0.0226876	0	0	0.0528992	0.033682	0	0.0184007	0	0	0	0	0	0.0621837	0	0	0	0	0	0	0	0
ASV914	Bacteria	Chloroflexota	Chloroflexia	0	0	0.0287097	0.051194	0	0	0.036025	0.0198279	0	0	0.0208867	0.0506567	0	0	0	0	0	0	0	0	0	0	0	0.0370285	0	0	0	0.0327308	0	0	0	0	0	0	0	0	0	0	0	0	0.0193414	0	0	0	0.0231435	0
ASV915	Bacteria	Unclassified Bacteria	Unclassified Bacteria	0	0	0	0	0	0	0.0180125	0	0.0380005	0	0	0	0	0	0	0	0	0	0	0	0	0	0	0	0	0	0	0	0.0362457	0.0297194	0	0.0391016	0.0193251	0	0.0469312	0	0	0	0.0257026	0	0	0.0434805	0	0	0	0
ASV916	Bacteria	Pseudomonadota	Alphaproteobacteria	0	0	0	0.0918481	0	0	0	0.0624579	0	0	0	0	0	0	0	0.0351401	0	0	0	0.0428673	0	0	0	0	0	0	0	0	0	0	0	0.0264511	0	0	0	0	0	0	0	0	0	0	0.153619	0	0	0
ASV917	Bacteria	Chloroflexota	Chloroflexia	0.0318416	0	0	0	0.0262674	0	0	0	0.0205836	0	0	0	0	0	0	0	0.0167184	0	0	0	0.0266781	0	0	0	0	0.0272251	0	0	0.0284088	0.019813	0.0345411	0.0230009	0.0314032	0.0394335	0	0	0	0	0	0	0	0	0	0	0	0
ASV918	Bacteria	Acidobacteriota	Terriglobia	0.0464357	0.0155195	0	0	0.0306453	0	0	0	0	0	0	0	0	0	0	0	0	0	0	0	0.025196	0	0	0	0.0315821	0.0294938	0	0	0.0156738	0	0.02936	0.0333514	0	0.0295751	0	0	0	0	0	0	0	0	0	0	0	0
ASV919	Bacteria	Planctomycetota	Unclassified Planctomycetota	0	0.0193994	0	0.0225856	0.0569127	0	0	0.0148709	0	0.0594019	0	0	0	0	0	0	0	0	0	0	0	0	0.0508572	0	0	0	0	0	0	0	0	0	0	0	0.0366292	0.0665853	0	0	0	0	0	0	0	0	0	0
ASV920	Bacteria	Planctomycetota	Planctomycetia	0	0	0	0	0	0	0	0	0	0.0157597	0.0132916	0	0	0.204506	0	0	0	0	0	0	0	0	0.127143	0	0	0	0	0	0	0	0	0	0	0	0	0	0	0	0.0424652	0	0	0	0.107243	0	0	0
ASV921	Bacteria	Chloroflexota	Chloroflexia	0.0145941	0	0	0	0.0186061	0	0	0	0.0332505	0	0	0	0	0	0	0	0	0	0	0	0.0429814	0	0	0	0.0260896	0	0	0	0.012735	0.0158504	0.02936	0.0333514	0	0.027932	0	0	0	0.0231381	0	0	0	0.0345286	0	0	0	0
ASV922	Bacteria	Chloroflexota	Chloroflexia	0	0	0	0	0	0	0	0.0128881	0	0	0.0265831	0	0	0	0	0	0	0	0	0.0619195	0	0	0	0	0	0	0	0.0193961	0	0	0	0	0	0	0	0.133171	0	0	0	0	0.0886482	0	0	0.0863588	0	0
ASV923	Bacteria	Acidobacteriota	Unclassified Acidobacteriota	0.0212278	0	0	0	0.0153227	0	0	0	0.026917	0.0375808	0	0	0	0	0	0	0.0453786	0	0	0	0	0.0602773	0	0	0.0357015	0	0	0	0	0.0416072	0	0	0	0.0345043	0	0	0	0	0.0379952	0	0	0	0	0	0	0
ASV924	Bacteria	Planctomycetota	Unclassified Planctomycetota	0.0159208	0.0155195	0.0396467	0	0	0	0.0468325	0.0128881	0.0237503	0.0242457	0.0170891	0	0	0	0	0	0	0	0.0738968	0	0	0	0	0	0	0	0.017322	0	0	0	0	0	0	0	0.0274719	0	0	0	0	0	0.0274004	0	0	0	0	0
ASV925	Bacteria	Pseudomonadota	Alphaproteobacteria	0	0.00290991	0	0	0.00766133	0	0	0	0	0.0145474	0.0180385	0	0	0	0.0102428	0	0	0.0146499	0	0.0357228	0.0177854	0	0.0317857	0.0158694	0.0219702	0	0	0	0.012735	0.0554763	0	0	0.0217407	0	0	0	0	0.0231381	0.0134101	0	0	0.0281344	0	0	0	0
ASV926	Bacteria	Unclassified Bacteria	Unclassified Bacteria	0	0	0.0150384	0.051194	0	0	0	0.0148709	0	0	0	0.0525328	0	0	0.0204855	0	0	0	0	0	0	0	0	0.0282122	0	0	0	0.0497024	0	0	0	0	0	0	0	0	0.0290439	0	0	0	0.0161179	0	0	0.0189989	0.0305074	0
ASV927	Bacteria	Pseudomonadota	Alphaproteobacteria	0	0	0	0	0	0	0	0	0	0	0	0	0	0	0.0676022	0	0	0	0	0	0	0	0	0	0	0	0.0551155	0.0484901	0	0	0	0	0	0	0	0	0	0	0	0	0	0	0	0	0.0452351	0.0845186
ASV928	Bacteria	Unclassified Bacteria	Unclassified Bacteria	0.0477625	0	0	0	0.0306453	0	0	0	0.0300838	0	0	0	0	0	0	0	0	0.0227887	0	0	0.0207497	0	0	0	0.030209	0	0	0	0	0.0178317	0	0.0218509	0.0289876	0.0295751	0	0	0	0.0231381	0	0	0	0.0191826	0	0	0	0
ASV929	Bacteria	Acidobacteriota	Unclassified Acidobacteriota	0	0	0.0232412	0.0301141	0	0	0	0.00793116	0	0	0.014241	0.0281426	0	0	0.0245826	0.0263551	0	0	0	0.0166706	0	0	0	0.0352653	0	0	0.0267704	0.0266696	0	0	0	0	0	0	0	0	0.0119593	0	0	0.0393929	0.0290121	0	0	0	0.0199876	0
ASV930	Bacteria	Planctomycetota	Unclassified Planctomycetota	0	0	0	0	0	0	0	0	0	0	0	0	0	0	0	0	0	0	0	0	0	0	0	0	0	0	0	0.0157593	0	0	0	0	0	0	0	0	0	0	0	0	0	0	0	0	0.0241955	0.103837
ASV931	Bacteria	Pseudomonadota	Gammaproteobacteria	0.019901	0	0.0136713	0	0.00985028	0.0287202	0	0	0	0	0	0	0	0	0	0	0	0	0	0	0	0	0	0	0	0	0	0	0	0	0	0	0	0	0	0	0	0.00867679	0	0	0	0	0	0	0	0.149719
ASV932	Bacteria	Unclassified Bacteria	Unclassified Bacteria	0	0	0	0	0	0	0	0.0644407	0	0	0.0151904	0.0356473	0	0	0	0	0	0	0	0	0	0	0	0	0	0	0	0.0594004	0	0	0	0	0	0	0	0	0	0	0	0	0	0	0	0.0535424	0.0220915	0
ASV933	Bacteria	Chloroflexota	Chloroflexia	0.00928715	0	0.0123042	0	0	0	0	0	0	0	0.0104434	0.0131332	0	0	0.0102428	0	0	0.00651105	0	0.0261967	0	0	0.00635714	0.00881632	0	0.0113438	0	0.014547	0	0	0	0	0	0.0147876	0.00801264	0	0	0.0130152	0	0	0.0177296	0	0	0.00863588	0.0347153	0.0289778
ASV934	Bacteria	Chloroflexota	Chloroflexia	0	0.00872973	0.0164055	0	0.0120392	0	0.0162113	0	0	0.0181842	0.0246843	0	0	0.0649224	0	0	0	0.027672	0	0.0142891	0	0	0	0	0.0219702	0	0.017322	0	0	0	0	0	0	0	0.0206039	0	0	0	0.0536403	0	0	0	0	0	0	0
ASV935	Bacteria	Chloroflexota	Chloroflexia	0	0	0	0.0346313	0	0	0	0.00991395	0	0	0	0	0	0	0.0573594	0	0	0	0	0.0476304	0	0	0	0.033502	0	0	0	0.0290941	0	0	0	0	0	0	0	0	0.0324609	0	0	0	0.0531889	0	0	0	0.0431311	0
ASV936	Bacteria	Verrucomicrobiota	Unclassified Verrucomicrobiota	0.0477625	0	0	0	0	0	0	0	0	0	0	0	0	0	0	0	0	0	0	0	0	0	0	0	0	0	0	0	0	0	0.0708093	0.0908537	0	0	0	0	0	0	0	0	0	0.0780091	0	0	0	0
ASV937	Bacteria	Acidobacteriota	Unclassified Acidobacteriota	0	0	0	0.0737796	0	0.0306349	0	0	0	0	0.0379759	0.043152	0	0	0	0.0483177	0	0	0	0	0	0	0	0	0	0	0	0.0460656	0	0	0	0	0	0	0.0228932	0	0	0	0	0	0.0306239	0	0	0	0	0
ASV938	Bacteria	Chloroflexota	Dehalococcoidia	0	0	0.00820277	0	0	0.0191468	0.0198138	0.0188365	0	0.0145474	0.0123422	0	0	0	0.0348254	0.0439252	0	0	0	0.0333413	0	0	0	0.0317388	0	0	0.0188967	0	0	0	0	0	0	0	0.0137359	0.0295935	0.0392947	0	0.0122926	0	0.0161179	0	0	0.0155446	0	0
ASV939	Bacteria	Pseudomonadota	Deltaproteobacteria	0	0	0	0.0647454	0	0	0	0	0	0	0	0	0	0	0	0	0	0	0	0	0	0	0	0	0	0	0	0	0	0	0	0	0	0	0	0	0	0	0	0	0.0193414	0	0	0	0.0578588	0
ASV940	Bacteria	Verrucomicrobiota	Verrucomicrobiia	0.0398021	0	0.0382796	0	0	0.0440377	0	0.0128881	0	0.0254579	0	0	0	0	0.0450681	0	0	0	0	0.0500119	0	0	0	0.0511347	0	0	0	0	0	0	0	0	0	0	0.0309059	0	0	0	0	0	0	0	0	0	0	0
ASV941	Bacteria	Planctomycetota	Unclassified Planctomycetota	0.0278614	0.0213393	0	0	0.0164171	0	0	0	0.0190003	0	0	0	0.0465062	0	0	0	0.0214951	0.0292997	0	0	0.0148212	0	0	0	0.0178508	0.0260907	0	0	0.0117554	0	0	0.0126505	0.0144938	0	0	0	0	0.0187997	0	0	0	0.0268556	0	0	0	0
ASV942	Archaea	Methanobacteriota	Thermococci	0	0	0.0341782	0.0828139	0	0	0	0.0109053	0	0	0.0370265	0	0	0	0	0	0	0	0	0	0	0	0	0	0	0	0.0299198	0.0218206	0	0	0	0	0	0	0	0	0	0	0	0	0.0757539	0	0	0	0	0
ASV943	Unknown	Unknown	Unknown	0	0	0.0218741	0.00451712	0	0	0	0.00297418	0	0.0157597	0.0332289	0.00562852	0	0	0.0143399	0.0307476	0	0	0	0.0238152	0	0	0	0.033502	0	0	0.0299198	0	0	0	0	0	0	0	0.0160253	0.0184959	0.0392947	0	0	0.0231723	0.0145061	0	0	0.0310892	0	0
ASV944	Bacteria	Gemmatimonadota	Gemmatimonadia	0	0	0	0.0301141	0	0	0	0.0128881	0	0	0.0294313	0.0206379	0	0	0.0081942	0	0	0	0	0	0	0	0	0.0405551	0	0	0.0236209	0.0266696	0	0	0	0	0	0	0	0.0924796	0.0102508	0	0	0	0.0386828	0	0	0.0345435	0	0
ASV945	Bacteria	Verrucomicrobiota	Verrucomicrobiia	0	0	0	0	0.0240785	0	0	0	0	0	0	0	0	0	0	0	0	0	0	0	0	0	0	0	0.0466866	0.0601221	0	0	0.0293884	0.0515137	0.0483576	0	0.0507283	0	0	0	0	0	0	0	0	0	0	0	0	0
ASV946	Bacteria	Chloroflexota	Chloroflexia	0	0	0	0	0	0.0497817	0.0396275	0	0.044334	0.0424299	0.0294313	0	0	0	0	0	0.0453786	0	0	0	0	0	0	0	0	0	0	0.0315186	0	0	0	0	0	0	0	0	0	0	0	0	0.0435182	0	0	0	0	0
ASV947	Bacteria	Pseudomonadota	Deltaproteobacteria	0.0265347	0	0	0	0.020795	0.0229762	0	0	0	0	0	0	0	0	0	0	0.0119417	0	0	0	0.0133391	0	0	0	0	0.0181501	0	0	0.030368	0.019813	0.0328141	0.0161007	0.0072469	0.026289	0	0	0	0.021692	0	0.0139034	0	0.0242979	0	0	0	0
ASV948	Bacteria	Planctomycetota	Planctomycetia	0	0	0	0	0	0	0	0	0.0601675	0	0	0	0	0	0	0	0	0	0	0	0	0	0	0	0	0.0431064	0	0	0.0607361	0	0.0794446	0.0345014	0	0	0	0	0	0	0	0	0	0	0	0	0	0
ASV949	Bacteria	Chloroflexota	Chloroflexia	0	0	0	0.0165628	0	0	0	0.00594837	0	0	0	0	0	0	0	0	0	0	0	0	0	0	0	0	0	0	0	0.0424289	0	0	0	0	0	0	0	0	0.0119593	0	0	0	0	0	0	0	0.0220915	0.13523
ASV950	Bacteria	Pseudomonadota	Deltaproteobacteria	0	0	0	0	0	0	0	0	0	0	0	0	0	0	0	0	0	0	0	0	0	0	0	0	0	0	0	0	0	0	0	0	0	0	0.244958	0	0	0	0	0	0	0	0	0	0	0
ASV951	Bacteria	Chloroflexota	Chloroflexia	0.0305149	0.0145495	0	0	0.0142282	0	0	0	0	0.0242457	0	0	0	0.0292151	0	0	0	0.0130221	0	0	0.0400172	0.0168776	0	0	0	0.0102094	0	0	0.0068573	0.0158504	0.0120894	0.0149506	0.0144938	0.0295751	0	0	0	0.0144613	0	0	0	0.0153461	0	0	0	0
ASV952	Bacteria	Actinomycetota	Unclassified Actinomycetota	0	0	0	0	0	0	0	0	0	0	0	0	0	0.0292151	0	0	0	0	0	0	0	0	0	0	0	0	0	0	0	0	0	0	0	0	0	0	0	0	0	0.0417101	0	0	0	0.3178	0	0
ASV953	Bacteria	Pseudomonadota	Deltaproteobacteria	0	0	0	0	0.0514403	0	0	0	0	0	0	0	0	0	0	0	0	0	0	0	0	0	0	0	0	0	0	0	0	0	0	0	0	0.136374	0	0	0	0	0	0	0.128943	0	0	0	0	0
ASV954	Bacteria	Chloroflexota	Chloroflexia	0.019901	0.0126096	0	0	0.0186061	0	0.0162113	0	0	0	0	0	0	0	0	0	0.0214951	0	0	0	0.0192675	0.0313442	0	0	0.0123582	0.0170157	0	0	0.012735	0	0.0224517	0.0161007	0.0193251	0.0213598	0	0	0	0.0130152	0.0122926	0	0	0.0191826	0	0	0	0
ASV955	Bacteria	Planctomycetota	Unclassified Planctomycetota	0.0212278	0.0213393	0.0191398	0	0	0	0	0	0	0.0303071	0	0	0	0	0	0	0	0.0227887	0.0527834	0.0381043	0.00889271	0	0	0	0.0123582	0	0.0409429	0	0	0	0.00863528	0	0	0.00821531	0.0274719	0	0	0	0	0.0254895	0	0	0	0	0	0
ASV956	Bacteria	Chloroflexota	Chloroflexia	0.0119406	0	0	0	0.0350232	0.0268055	0	0	0.0174169	0	0	0	0	0	0	0	0.0286601	0	0	0	0.025196	0	0	0	0	0.0170157	0	0	0	0	0.0189976	0.0138006	0	0.026289	0.0263272	0	0	0.033261	0	0	0	0.0166249	0	0	0	0
ASV957	Bacteria	Chloroflexota	Chloroflexia	0	0	0.0287097	0.0466769	0	0.0287202	0	0	0	0	0.0151904	0.0356473	0	0	0	0	0	0	0	0	0	0	0	0.0405551	0	0	0	0.0266696	0	0	0	0	0	0	0	0	0	0	0	0	0.022565	0	0	0	0.049443	0
ASV958	Bacteria	Planctomycetota	Unclassified Planctomycetota	0.0159208	0.0300691	0	0	0.0120392	0.0191468	0	0	0.022167	0.0242457	0	0	0	0	0	0	0	0	0.066859	0	0.0163033	0.0433996	0.0317857	0	0	0	0	0	0	0	0	0	0	0.0180737	0.0125913	0	0	0.0231381	0	0.0185378	0	0	0	0	0	0
ASV959	Bacteria	Pseudomonadota	Deltaproteobacteria	0.0145941	0.0116396	0	0	0.0262674	0.0229762	0	0	0.0190003	0.0266702	0	0	0	0.0324612	0	0	0	0.00976658	0.0211134	0	0.0237139	0	0	0	0.0123582	0	0	0	0	0	0	0.0195508	0	0.0180737	0.0366292	0	0	0	0.00782254	0	0	0	0	0	0	0
ASV960	Bacteria	Pseudomonadota	Alphaproteobacteria	0.0106139	0.0155195	0	0	0.0120392	0.0172321	0.0126088	0	0.00791678	0.00606141	0.00664578	0.00562852	0	0	0	0	0	0.0227887	0	0.0190522	0.0118569	0	0.0169524	0.0176326	0	0	0.0283451	0.0109103	0	0	0	0	0	0.0213598	0	0.0221951	0.0205016	0.0173536	0.00894005	0	0	0.0127884	0	0	0	0
ASV961	Bacteria	Pseudomonadota	Gammaproteobacteria	0	0	0	0.0195742	0	0.0268055	0	0.0188365	0.026917	0	0.0123422	0	0	0	0.0081942	0	0	0	0.0387079	0.0285782	0	0	0	0	0	0	0.0125978	0	0	0	0	0	0	0	0	0.0110975	0.0222101	0	0	0.0324412	0	0	0	0.0189989	0.0252475	0.0338074
ASV962	Bacteria	Planctomycetota	Unclassified Planctomycetota	0	0	0.0177727	0	0	0	0	0	0	0	0	0.0375235	0	0	0	0	0	0	0	0	0	0	0	0	0	0	0	0.0315186	0	0	0	0	0	0	0	0	0.0205016	0	0	0	0.0306239	0	0	0	0.0284034	0.0507112
ASV963	Bacteria	Unclassified Bacteria	Unclassified Bacteria	0	0.0184294	0.0123042	0.0165628	0	0	0.0198138	0.0138795	0	0.0157597	0.00759518	0.0281426	0	0.0194767	0.0204855	0	0	0.0130221	0	0	0	0.0241109	0	0.00705306	0	0	0.00629892	0.0157593	0	0	0	0	0	0	0	0	0	0	0.0100576	0	0.0161179	0	0	0	0.0136757	0
ASV964	Bacteria	Deferribacterota	Deferribacteres	0	0	0.0123042	0.0105399	0	0	0	0.0148709	0	0	0	0.0168856	0	0	0.0204855	0	0	0	0	0.00952608	0	0	0	0	0	0	0.0110231	0.0315186	0	0	0	0	0	0	0	0.0147967	0	0	0	0.0208551	0	0	0	0.0103631	0.0210396	0.0241482
ASV965	Unknown	Unknown	Unknown	0	0	0	0.0722739	0	0	0	0	0	0	0	0	0	0.0584302	0	0	0	0	0	0	0	0	0	0	0	0	0	0.0327308	0	0	0	0	0	0	0.0824157	0	0	0	0	0	0	0	0	0	0.0431311	0
ASV966	Bacteria	Planctomycetota	Unclassified Planctomycetota	0.00530694	0.00775976	0	0	0.0043779	0.0153175	0.0108075	0.0198279	0	0	0.00949397	0.0318949	0	0	0.0102428	0	0	0	0	0	0.00889271	0	0.0127143	0.00881632	0.0123582	0	0	0.0169715	0	0	0	0	0	0	0	0.0295935	0	0.00578453	0	0	0.0112825	0	0	0	0.0126237	0.0338074
ASV967	Bacteria	Chloroflexota	Dehalococcoidia	0	0	0	0	0	0	0	0.0356902	0	0	0	0	0	0	0	0.263551	0	0	0	0.142891	0	0	0	0.0440816	0	0	0	0	0	0	0	0	0	0	0	0	0	0	0.0268201	0	0	0	0	0	0	0
ASV968	Bacteria	Acidobacteriota	Terriglobia	0	0	0	0	0	0.0134028	0.0234163	0.0128881	0	0.0157597	0.0170891	0.0487805	0	0	0.0348254	0	0	0	0	0.0214337	0	0	0	0.0370285	0	0	0	0.0230328	0	0	0	0	0	0	0	0.0332926	0.0375863	0	0	0.0254895	0	0	0	0.0120902	0	0
ASV969	Bacteria	Pseudomonadota	Gammaproteobacteria	0.0291882	0.0261892	0	0	0	0	0	0	0.0253337	0	0	0	0	0	0	0	0	0	0	0	0	0.0313442	0.0402619	0	0	0	0	0	0.0215515	0	0.0189976	0.0218509	0.0362345	0	0	0	0	0	0.0145276	0	0	0.0345286	0	0	0	0
ASV970	Bacteria	Pseudomonadota	Alphaproteobacteria	0.0132674	0.00775976	0	0	0.0043779	0.00957341	0	0	0.00475007	0.00121228	0	0	0	0	0	0	0.0716503	0	0	0	0.00592847	0	0	0	0.0164776	0.00453751	0	0	0.000979614	0.0277382	0.0656281	0.00690028	0.128029	0.00821531	0	0	0	0.00144613	0	0	0	0.00639419	0	0	0	0
ASV971	Bacteria	Pseudomonadota	Alphaproteobacteria	0	0	0	0.0150571	0	0	0	0	0	0	0	0.0318949	0	0	0	0	0	0	0	0	0	0	0	0	0	0	0	0	0	0	0	0	0	0	0	0	0	0	0	0	0	0	0	0	0.0389232	0.103837
ASV972	Bacteria	Planctomycetota	Planctomycetia	0	0	0	0	0	0	0	0.0138795	0	0	0.00949397	0.0281426	0	0	0	0	0	0	0	0	0	0	0	0	0	0	0	0.0193961	0	0	0	0	0	0	0	0	0	0	0	0.00926891	0.0128943	0	0	0	0.0189356	0.0676149
ASV973	Bacteria	Acidobacteriota	Terriglobia	0	0.0290991	0.0328111	0	0.022984	0.078502	0	0	0	0	0.0294313	0	0	0	0	0	0.0525436	0.0553439	0	0	0	0	0	0	0	0	0	0	0	0	0	0	0	0	0	0	0	0	0	0	0	0	0	0	0	0
ASV974	Bacteria	Chloroflexota	Chloroflexia	0	0	0	0.00903424	0	0	0	0.0257763	0	0	0	0.0262664	0	0	0	0	0	0	0	0	0	0	0	0.0193959	0	0	0.0236209	0.0545514	0	0	0	0	0	0	0	0	0.0136677	0	0	0.0162206	0	0	0	0	0.0357673	0.0120741
ASV975	Bacteria	Chloroflexota	Chloroflexia	0	0	0	0.0286084	0	0	0	0	0	0	0.0246843	0	0	0.0292151	0.0471167	0	0	0	0	0	0	0	0	0	0	0	0.0330693	0.0242451	0	0	0	0	0	0	0.0228932	0	0.0392947	0	0	0.0463446	0	0	0	0	0.0231435	0
ASV976	Bacteria	Chloroflexota	Chloroflexia	0	0	0.0123042	0.0195742	0	0	0	0.0128881	0	0.0254579	0	0	0	0	0.0307283	0	0	0	0	0.0238152	0	0.0361664	0	0.0193959	0	0	0.0204715	0	0	0	0	0	0	0	0	0	0.0461286	0	0	0.0393929	0.0435182	0	0	0.0189989	0	0
ASV977	Bacteria	Pseudomonadota	Unclassified Pseudomonadota	0.0291882	0	0	0	0.0153227	0	0	0	0	0	0	0	0	0	0	0	0.0334368	0	0	0	0.0177854	0	0	0	0.0233433	0.0283595	0	0	0.02547	0	0.0241788	0.025301	0	0.0394335	0	0	0	0	0	0	0	0.0140672	0	0	0	0
ASV978	Bacteria	Unclassified Bacteria	Unclassified Bacteria	0.0159208	0.0242492	0.00683564	0	0.0087558	0	0.0108075	0	0.0142502	0.0206088	0.0104434	0	0.0290664	0	0	0	0	0	0	0	0	0.0168776	0	0	0.0164776	0.0192844	0.0110231	0	0.0186127	0	0	0.0218509	0	0.0164306	0	0	0	0	0.00894005	0	0	0	0.0115939	0	0	0
ASV979	Bacteria	Unclassified Bacteria	Unclassified Bacteria	0	0.0106697	0	0.00752853	0	0.0191468	0.0234163	0	0	0.016972	0.0132916	0	0	0.0551841	0.0307283	0	0	0	0	0	0	0	0.0105952	0.0229224	0	0	0.0110231	0	0	0	0	0	0	0	0.0297612	0	0	0	0.0201151	0.0347584	0	0	0	0.0310892	0	0
ASV980	Bacteria	Gemmatimonadota	Gemmatimonadia	0	0	0	0.0210799	0	0	0	0.00892255	0	0	0	0.0187617	0	0	0	0	0	0	0	0	0	0	0	0	0	0	0	0.0290941	0	0	0	0	0	0	0	0	0	0	0	0	0	0	0	0	0.0294554	0.0700297
ASV981	Bacteria	Pseudomonadota	Gammaproteobacteria	0	0	0	0	0	0	0	0	0	0	0	0	0	0	0	0	0	0	0	0	0	0	0	0	0	0	0	0	0	0	0	0	0	0	0	0	0	0	0	0	0	0	0	0	0	0.214919
ASV982	Bacteria	Pseudomonadota	Gammaproteobacteria	0.0371486	0	0	0	0	0	0	0	0	0	0	0	0	0	0	0	0	0	0	0	0	0	0	0	0.0164776	0.0567189	0	0	0.0225311	0	0.062174	0	0	0	0.0583778	0	0	0	0	0	0	0	0	0	0	0
ASV983	Bacteria	Pseudomonadota	Deltaproteobacteria	0.0106139	0	0.0259754	0.00752853	0	0	0.0252175	0.0118967	0	0.0145474	0.0151904	0	0	0.0129845	0.0245826	0.0219626	0	0.00976658	0	0.0261967	0	0.0120555	0.0105952	0.0229224	0	0	0.0267704	0.0133348	0	0	0	0	0	0	0.010302	0	0.0102508	0	0	0	0.00967071	0	0	0.0069087	0	0
ASV984	Bacteria	Chloroflexota	Chloroflexia	0.0238812	0.0116396	0	0	0	0.00957341	0.0198138	0	0	0.0254579	0	0	0	0.0194767	0	0	0	0.027672	0.0246323	0	0	0.0192887	0.0233095	0	0	0.00907503	0	0	0	0	0	0	0.0241563	0.00985837	0.0217486	0	0	0	0.0145276	0	0	0.0191826	0.0376801	0	0	0
ASV985	Bacteria	Planctomycetota	Unclassified Planctomycetota	0	0	0	0.0692625	0	0	0	0.0386644	0	0	0	0	0	0	0	0	0	0	0	0	0	0	0	0	0	0	0	0.0690984	0	0	0	0	0	0	0	0	0	0	0	0	0.0934836	0	0	0	0	0
ASV986	Bacteria	Unclassified Bacteria	Unclassified Bacteria	0.00663368	0	0.0136713	0.0286084	0	0	0	0.0148709	0	0	0.0151904	0.0356473	0	0	0	0	0.00716503	0	0	0	0.00741059	0	0	0	0	0.0147469	0.00629892	0.0169715	0.0068573	0	0.00863528	0.0138006	0	0.00821531	0	0	0.00683387	0	0	0	0	0	0	0	0.0305074	0
ASV987	Bacteria	Pseudomonadota	Deltaproteobacteria	0	0	0	0	0	0	0	0	0	0	0.0104434	0.0243902	0	0	0	0	0	0	0	0	0	0	0	0	0	0	0	0.0290941	0	0	0	0	0	0	0	0	0.0222101	0	0	0	0	0	0	0	0.0136757	0.0748593
ASV988	Bacteria	Chloroflexota	Chloroflexia	0	0.00678979	0.0273426	0	0	0	0	0.0178451	0	0	0.014241	0.0225141	0	0	0.0245826	0.114205	0	0	0	0	0	0	0	0.0299755	0	0	0.0220462	0.014547	0	0	0	0	0	0	0.0331952	0	0	0	0	0.00695169	0	0	0	0.0120902	0.00736385	0
ASV989	Bacteria	Pseudomonadota	Deltaproteobacteria	0.0172476	0.0164895	0	0	0.0109448	0	0.0252175	0	0.0190003	0.0157597	0.00569638	0	0	0.025969	0	0	0.0191068	0	0	0	0.0148212	0	0	0	0.0123582	0.00680627	0	0	0	0	0.0259058	0	0.0120782	0	0.0148806	0	0	0.0173536	0.0145276	0	0	0.0179037	0	0	0	0
ASV990	Bacteria	Verrucomicrobiota	Verrucomicrobiia	0	0.0193994	0	0	0.0164171	0.0134028	0	0.0148709	0	0.0303071	0	0	0	0.0227228	0	0	0	0.0179054	0	0	0	0.0216998	0.0275476	0	0	0.0124782	0	0	0.0068573	0	0	0.00575023	0	0	0.0125913	0	0	0	0.0178801	0	0	0.0191826	0.0318831	0	0	0
ASV991	Bacteria	Pseudomonadota	Unclassified Pseudomonadota	0	0.0155195	0.0396467	0	0.0109448	0.0402083	0.01441	0.0109053	0	0.00848598	0.00854457	0	0	0	0	0	0	0.0227887	0	0.0309598	0	0.0192887	0.0317857	0	0.0178508	0	0	0	0	0	0	0	0	0	0	0	0	0	0.0111751	0	0	0.0140672	0.0086954	0	0	0
ASV992	Bacteria	Unclassified Bacteria	Unclassified Bacteria	0.0318416	0	0	0	0.0197006	0	0	0	0.026917	0	0	0	0	0	0	0	0.0310485	0.027672	0	0	0.0222318	0	0	0	0	0.0238219	0	0	0.038205	0	0	0.0391016	0	0	0	0	0	0	0	0	0	0	0	0	0	0
ASV993	Bacteria	Bacteroidota	Flavobacteriia	0	0	0	0	0	0	0	0	0	0	0	0	0	0	0	0	0	0	0	0	0	0	0	0	0	0	0	0	0	0	0	0	0	0	0	0	0	0	0	0	0.00483536	0	0	0	0	0.0941779
ASV994	Bacteria	Pseudomonadota	Deltaproteobacteria	0	0	0.0300768	0	0	0.0134028	0.0252175	0.00495697	0	0.0230334	0.0227855	0	0	0	0.0225341	0	0	0	0.0246323	0	0	0	0.0105952	0.0387918	0	0	0.017322	0.0157593	0	0	0	0	0	0	0.0148806	0	0.0222101	0	0	0.0115861	0	0	0	0.0120902	0	0
ASV995	Bacteria	Planctomycetota	Unclassified Planctomycetota	0	0.0174595	0.0273426	0	0	0.00957341	0.0180125	0.00991395	0	0.0242457	0.0189879	0	0	0.0227228	0.0225341	0	0	0.00813882	0.0105567	0.00952608	0	0.0216998	0.00847619	0	0	0	0.0125978	0	0	0	0	0	0	0	0.0137359	0	0.0153762	0	0.0167626	0.00926891	0	0	0.0086954	0	0	0
ASV996	Bacteria	Chloroflexota	Chloroflexia	0	0.0252192	0	0	0	0	0.0126088	0.0247849	0	0.0254579	0.0227855	0	0	0	0	0	0	0.0179054	0.035189	0	0	0	0	0.0423183	0	0	0.034644	0	0	0	0	0	0	0	0	0	0	0	0.0145276	0.0115861	0	0	0	0.0155446	0	0
ASV997	Bacteria	Planctomycetota	Planctomycetia	0	0.00581982	0	0	0	0.0631845	0	0	0	0	0	0	0	0	0	0	0	0	0	0	0	0	0.0656905	0	0	0	0	0	0	0	0	0	0	0.108442	0	0	0	0	0.0357602	0	0	0	0.0811571	0	0	0
ASV998	Bacteria	Pseudomonadota	Alphaproteobacteria	0	0	0	0	0	0	0	0	0.00950013	0.0218211	0.0151904	0	0	0.139583	0	0.149346	0	0.0211609	0	0	0	0.0216998	0	0	0	0	0.0220462	0	0	0	0	0	0	0	0.0206039	0	0	0.00867679	0.00670503	0	0.0209532	0	0	0	0	0
ASV999	Bacteria	Pseudomonadota	Alphaproteobacteria	0.025208	0.0426787	0	0.0195742	0	0.0172321	0	0	0	0	0.0161398	0	0	0	0	0	0	0.0406941	0	0	0	0	0.0381429	0	0.020597	0	0	0	0	0	0	0	0	0	0	0	0	0.0101229	0	0	0.04513	0	0	0	0	0
ASV1000	Bacteria	Acidobacteriota	Unclassified Acidobacteriota	0	0	0	0	0	0	0	0.0307332	0	0	0	0.105066	0	0	0	0	0	0	0	0	0	0	0	0	0	0	0	0	0	0	0	0	0	0	0	0	0	0	0	0	0	0	0	0	0.047339	0.0652001
ASV1001	Bacteria	Pseudomonadota	Alphaproteobacteria	0	0	0	0	0	0	0	0	0	0	0	0	0	0	0	0	0	0.183937	0	0	0	0.0578662	0	0	0	0	0	0	0	0.112934	0	0	0	0	0	0	0	0	0	0	0	0	0	0	0	0
ASV1002	Bacteria	Acidobacteriota	Unclassified Acidobacteriota	0.0225545	0	0	0	0	0	0	0	0	0	0	0	0	0	0	0	0.0310485	0	0	0	0	0	0	0	0	0.0691971	0	0	0.0568176	0.0435885	0	0	0	0.0377904	0	0	0	0	0	0	0	0	0	0	0	0
ASV1003	Bacteria	Chloroflexota	Dehalococcoidia	0.0159208	0.0096997	0	0	0	0.0229762	0	0	0	0.0133351	0.00664578	0	0	0	0	0	0	0.0472051	0	0	0	0.0313442	0	0	0.0274627	0	0	0	0	0	0	0	0	0.0131445	0.0183146	0	0	0	0.0134101	0.0278067	0	0.0179037	0	0.029362	0	0
ASV1004	Bacteria	Unclassified Bacteria	Unclassified Bacteria	0	0	0	0	0	0	0	0.0366816	0	0	0	0.0844278	0	0	0	0	0	0	0	0	0	0	0	0	0	0	0	0	0	0	0	0	0	0	0	0	0	0	0	0	0	0	0	0	0.0326113	0.0482963
ASV1005	Bacteria	Pseudomonadota	Gammaproteobacteria	0	0	0	0	0	0	0	0	0	0	0.0294313	0	0	0	0.0307283	0	0	0	0	0.0500119	0	0.0385775	0	0	0	0	0	0.0181838	0	0	0	0	0	0	0.0228932	0	0.0239185	0	0	0.0625652	0.0257886	0	0	0.0310892	0	0
ASV1006	Unknown	Unknown	Unknown	0	0	0	0	0	0	0	0	0	0	0	0	0	0	0	0	0	0	0	0	0	0.0699216	0	0	0	0.0499127	0	0	0	0	0	0	0	0	0	0	0.0580879	0.0636298	0.0469352	0	0	0	0	0	0	0
ASV1007	Bacteria	Acidobacteriota	Unclassified Acidobacteriota	0.00796041	0.0126096	0.0123042	0	0	0.0172321	0.0252175	0	0	0.0327316	0.014241	0	0	0.0194767	0.0081942	0	0	0.0309275	0	0	0	0.00964436	0.0105952	0	0.00961195	0	0.017322	0	0	0	0	0.0103504	0	0	0.0091573	0	0	0	0.0145276	0	0	0	0.0376801	0	0	0
ASV1008	Bacteria	Planctomycetota	Planctomycetia	0	0.00193994	0.0191398	0.0135514	0	0	0	0	0	0.0181842	0	0	0	0	0	0	0	0	0	0	0.0281602	0.0506329	0.0190714	0	0	0.0249563	0.0220462	0	0.0215515	0.0178317	0	0.00345014	0	0	0	0	0	0	0	0.0185378	0	0.0319709	0	0	0	0
ASV1009	Bacteria	Chloroflexota	Chloroflexia	0.0172476	0.0193994	0	0	0	0	0	0	0.0300838	0	0	0	0	0	0	0	0.0406019	0.0195332	0	0	0.037053	0.0216998	0	0	0	0	0	0	0	0	0	0.049452	0	0	0	0	0	0.0477223	0	0	0	0	0	0	0	0
ASV1010	Bacteria	Pseudomonadota	Gammaproteobacteria	0	0	0	0	0	0	0	0	0	0.0072737	0	0	0	0	0	0	0.0907571	0	0.0703779	0	0.0533563	0	0	0	0	0	0	0	0	0	0	0	0	0	0	0	0.0170847	0	0	0	0	0	0	0	0.0410272	0.0169037
ASV1011	Unknown	Unknown	Unknown	0.0132674	0.00872973	0.0177727	0	0.00766133	0.0210615	0	0	0	0.0109105	0.0218361	0	0	0	0.0143399	0	0	0	0.0316701	0	0	0	0.0148333	0	0	0.0158813	0.0251957	0	0	0.0118878	0	0	0	0	0.0148806	0	0.0136677	0	0.0212326	0	0	0	0	0.0155446	0	0
ASV1012	Bacteria	Pseudomonadota	Gammaproteobacteria	0	0.184294	0	0	0	0	0	0	0	0	0	0	0	0	0	0	0	0	0	0	0	0	0	0	0	0	0	0	0	0	0	0	0	0	0	0	0	0	0	0	0	0	0	0	0	0
ASV1013	Bacteria	Unclassified Bacteria	Unclassified Bacteria	0	0.0290991	0	0	0	0.0344643	0.0378263	0	0	0.0254579	0	0	0	0	0	0	0	0.0488329	0	0	0	0	0	0	0	0	0.0566902	0	0	0	0	0	0	0	0.0160253	0	0	0	0	0	0	0.0255768	0	0	0	0
ASV1014	Bacteria	Pseudomonadota	Alphaproteobacteria	0	0.0096997	0.0205069	0.0120457	0	0	0	0.0168537	0	0.0121228	0.0151904	0.0150094	0	0	0	0	0	0	0.0175945	0.00714456	0	0	0.0105952	0.0105796	0.0109851	0.00680627	0	0.00969803	0	0.0118878	0	0.00345014	0	0	0.0114466	0.0258943	0.0205016	0	0	0	0.0177296	0	0	0	0.00736385	0
ASV1015	Bacteria	Pseudomonadota	Alphaproteobacteria	0	0	0	0.0632397	0	0	0.0756525	0	0	0.0521282	0	0	0	0.0681685	0	0	0	0	0	0	0	0	0	0	0	0	0	0	0	0	0	0	0	0	0	0	0	0	0	0	0	0	0	0.0725414	0	0
ASV1016	Bacteria	Pseudomonadota	Gammaproteobacteria	0	0	0	0	0.0415901	0	0	0	0.0205836	0	0	0	0	0	0	0	0	0	0	0	0.0266781	0	0	0	0.0247164	0.0215532	0	0	0.0499603	0.0158504	0.0259058	0	0	0	0	0	0	0.0144613	0	0	0	0	0	0	0	0
ASV1017	Bacteria	Chloroflexota	Chloroflexia	0	0	0	0	0	0	0	0.0297418	0	0	0	0.0300188	0	0	0	0	0	0	0	0	0	0	0	0	0	0	0	0.0412166	0	0	0	0	0	0	0	0	0	0	0	0	0	0	0	0	0.0252475	0.026563
ASV1018	Archaea	Thermoproteota	Unclassified Thermoproteota	0	0	0	0	0.0262674	0	0	0	0	0	0	0	0.0290664	0	0	0	0	0	0	0	0	0	0	0	0.0274627	0.0249563	0	0	0.0352661	0.0416072	0.0397223	0	0.0289876	0	0	0	0	0.0375994	0	0	0	0	0	0	0	0
ASV1019	Bacteria	Planctomycetota	Unclassified Planctomycetota	0	0	0.0136713	0.0135514	0	0	0.0198138	0.0237935	0	0	0.0294313	0.0187617	0	0	0.0225341	0.0219626	0	0	0	0	0	0	0	0.0193959	0	0	0.0125978	0.014547	0	0	0	0	0	0	0	0	0.0307524	0	0	0.0324412	0.022565	0	0	0	0	0
ASV1020	Bacteria	Candidatus Binatota	Candidatus Binatia	0	0	0	0	0	0	0	0.0346988	0	0	0	0	0	0	0	0	0	0	0	0	0	0	0	0	0	0	0	0.0594004	0	0	0	0	0	0	0	0	0	0	0	0	0.0161179	0	0	0	0.0357673	0
ASV1021	Bacteria	Unclassified Bacteria	Unclassified Bacteria	0	0	0	0	0	0	0	0.0208193	0	0	0	0.0318949	0	0	0	0	0	0	0	0	0	0	0	0	0	0	0	0.0327308	0	0	0	0	0	0	0	0	0	0	0	0	0	0	0	0	0.0578588	0
ASV1022	Bacteria	Chloroflexota	Chloroflexia	0	0	0	0	0	0	0	0	0	0	0	0	0	0	0	0	0	0	0	0	0	0	0	0	0	0	0	0.0606127	0	0	0	0	0	0	0	0	0.0427117	0	0	0.0463446	0	0	0	0	0.0452351	0
ASV1023	Archaea	Methanobacteriota	Unclassified Methanobacteriota	0	0	0	0.0587226	0	0	0	0.0257763	0	0	0	0.0225141	0	0	0	0	0	0	0	0	0	0	0	0	0	0	0	0.0436411	0	0	0	0	0	0	0	0	0	0	0	0	0.0564125	0	0	0	0.0410272	0
ASV1024	Bacteria	Pseudomonadota	Alphaproteobacteria	0	0	0	0.0271027	0	0	0.01441	0.0118967	0	0	0	0	0	0	0.0225341	0	0	0	0	0	0	0	0	0.0176326	0	0	0.0188967	0.0509146	0	0	0	0	0	0	0	0	0.0205016	0	0	0.0208551	0.0161179	0	0	0	0.0252475	0
ASV1025	Bacteria	Pseudomonadota	Unclassified Pseudomonadota	0	0.0184294	0	0.0165628	0.0426845	0	0	0	0.0237503	0	0.0294313	0	0	0	0	0	0	0	0	0	0	0	0.0211905	0.0370285	0	0	0	0	0	0	0	0	0	0	0.0206039	0	0	0	0	0.0231723	0	0	0	0.0224533	0	0
ASV1026	Bacteria	Chloroflexota	Chloroflexia	0.00663368	0.00387988	0.010937	0.0271027	0	0	0	0.00793116	0	0	0	0.011257	0	0	0.059408	0	0	0	0	0.0190522	0	0	0.0317857	0.0687673	0	0	0.0236209	0.00121225	0	0	0	0	0	0	0.0137359	0	0	0	0	0	0.00161179	0	0	0.0276348	0.00105198	0
ASV1027	Bacteria	Chloroflexota	Chloroflexia	0	0	0	0.0301141	0	0	0	0.0247849	0	0	0	0	0	0	0.0286797	0	0	0	0	0.0285782	0	0	0	0	0	0	0	0.0290941	0	0	0	0	0	0	0	0	0.0341693	0	0	0	0	0	0	0.0155446	0.0105198	0.0507112
ASV1028	Bacteria	Bacteroidota	Unclassified Bacteroidota	0	0	0	0	0	0.0497817	0	0	0	0	0.014241	0	0	0	0	0	0	0	0	0	0.037053	0	0	0	0.0411941	0	0	0	0.0411438	0	0.0828987	0	0	0	0	0	0	0	0	0	0	0	0	0	0	0
ASV1029	Bacteria	Bacteroidota	Flavobacteriia	0.0265347	0	0	0	0.0164171	0.0229762	0	0	0.0411672	0	0	0	0	0	0	0	0	0.0195332	0	0	0.0148212	0	0	0	0.0466866	0	0	0	0.0274292	0	0	0.0172507	0	0	0	0	0	0.0187997	0	0	0	0	0	0	0	0
ASV1030	Bacteria	Candidatus Poribacteriota	Unclassified candidatus Poribacteriota	0	0.0223093	0	0	0.0273619	0	0	0	0	0	0	0	0	0	0	0	0.0358252	0	0	0	0	0	0	0	0	0.0397032	0	0	0.0352661	0.0317007	0.0397223	0.0138006	0	0	0	0	0	0	0	0	0	0	0	0	0	0
ASV1031	Bacteria	Acidobacteriota	Unclassified Acidobacteriota	0	0.00290991	0.010937	0.0210799	0	0	0.0126088	0.00892255	0	0.00484913	0.0113928	0.0168856	0	0	0.0348254	0	0	0.0113943	0	0.00714456	0	0	0.0105952	0.0176326	0	0	0.00944837	0.00848577	0	0	0	0	0	0	0	0	0.0102508	0	0.00558753	0.0278067	0.0161179	0	0	0.0241805	0.0178836	0
ASV1032	Bacteria	Acidobacteriota	Terriglobia	0	0	0.0164055	0	0	0.0268055	0.00900625	0.0128881	0	0.0145474	0	0	0	0	0.0286797	0	0	0	0	0.0428673	0	0	0	0.0193959	0	0	0.0251957	0	0.012735	0	0	0	0	0	0.0148806	0.0739836	0.0051254	0	0	0.0115861	0.0177296	0	0	0.00863588	0	0
ASV1033	Bacteria	Pseudomonadota	Deltaproteobacteria	0	0	0.0205069	0	0	0	0	0.0128881	0	0	0.0398747	0	0	0	0.0163884	0	0	0	0	0.0381043	0	0.0385775	0	0	0	0	0.0188967	0	0	0	0	0	0	0	0	0	0.0222101	0	0	0.050979	0.0177296	0	0	0.029362	0	0
ASV1034	Bacteria	Bacteroidota	Unclassified Bacteroidota	0	0	0	0	0	0	0	0	0	0	0	0	0	0	0	0	0	0	0	0	0	0	0	0	0	0	0	0	0	0	0	0	0	0	0	0	0	0	0	0	0	0	0	0	0.00841583	0.0555408
ASV1035	Unknown	Unknown	Unknown	0	0	0.0205069	0.0150571	0	0	0	0.04263	0.00791678	0.0121228	0.00759518	0.0150094	0	0	0.0143399	0	0	0	0	0.0333413	0	0	0.00635714	0.0123428	0	0	0	0	0	0	0	0	0	0	0	0	0.0239185	0	0.00782254	0.0208551	0.0177296	0	0.0115939	0.0138174	0	0
ASV1036	Unknown	Unknown	Unknown	0	0	0	0	0.0262674	0	0	0	0.0316671	0	0	0	0	0	0	0	0.0310485	0	0	0	0.0296424	0	0	0	0.0329553	0.0431064	0	0	0	0.019813	0.0241788	0	0	0.0328612	0	0	0	0	0	0	0	0	0	0	0	0
ASV1037	Bacteria	Chloroflexota	Chloroflexia	0	0	0	0	0	0	0	0	0	0	0	0	0	0	0	0	0.0644853	0	0	0	0	0	0	0	0	0.0431064	0	0	0.0509399	0.0317007	0.0569928	0	0	0	0	0	0	0.0245842	0	0	0	0	0	0	0	0
ASV1038	Bacteria	Acidobacteriota	Terriglobia	0	0	0	0	0	0	0	0.032716	0	0	0	0.0393996	0	0	0	0	0	0	0	0	0	0	0	0.0493714	0	0	0	0.0533392	0	0	0	0	0	0	0	0	0	0	0	0	0.0564125	0	0	0.0379979	0	0
ASV1039	Bacteria	Acidobacteriota	Unclassified Acidobacteriota	0.019901	0	0.0287097	0	0.0251729	0.0268055	0.021615	0	0.0253337	0.016972	0	0	0	0	0	0	0.0191068	0	0	0	0	0	0	0	0.0164776	0	0	0	0.0146942	0.019813	0	0	0.026572	0.0197167	0	0	0	0	0	0	0	0	0	0	0	0
ASV1040	Bacteria	Bacteroidota	Flavobacteriia	0.0225545	0.0106697	0	0	0.0175116	0	0.0198138	0.0158623	0.0126668	0	0	0	0	0	0	0	0	0.0146499	0	0	0	0	0	0	0.0178508	0.0226876	0.00787364	0	0	0	0	0.0103504	0.0144938	0.00821531	0.010302	0	0.0239185	0.0101229	0	0	0	0.00767303	0	0	0	0
ASV1041	Bacteria	Pseudomonadota	Alphaproteobacteria	0.0145941	0.00581982	0	0	0.0120392	0	0	0	0.026917	0	0	0	0	0	0	0	0.0167184	0	0	0	0	0	0	0	0.0192239	0.0192844	0	0.0157593	0.0333069	0	0.0466305	0	0	0.0164306	0	0	0	0.021692	0	0	0	0	0	0	0	0
ASV1042	Bacteria	Planctomycetota	Unclassified Planctomycetota	0	0	0.0150384	0.00752853	0	0	0	0.0267677	0	0	0.0151904	0	0	0	0.0122913	0.0263551	0	0	0	0.0261967	0	0	0	0.0193959	0	0	0.0299198	0.00848577	0	0	0	0	0	0	0	0.0369918	0.0273355	0	0	0	0.0257886	0	0	0.0362707	0	0
ASV1043	Bacteria	Pseudomonadota	Deltaproteobacteria	0	0	0	0	0	0	0	0	0	0	0	0.0337711	0	0	0	0	0	0	0	0	0	0	0	0	0.0288359	0.0431064	0.0299198	0	0	0	0.0431764	0.0552022	0	0	0	0	0	0	0	0	0.0209532	0	0	0	0	0
ASV1044	Bacteria	Pseudomonadota	Deltaproteobacteria	0	0.0290991	0	0	0	0.0344643	0	0	0	0.0218211	0	0	0.0465062	0.0324612	0	0	0	0	0	0	0	0.0361664	0	0	0	0	0	0	0	0	0	0	0	0	0.0354845	0	0	0	0.0581103	0	0	0	0	0	0	0
ASV1045	Bacteria	Planctomycetota	Phycisphaerae	0	0	0	0	0.0251729	0	0	0	0.0205836	0	0	0	0	0	0	0	0	0.0260442	0	0	0.0103748	0	0	0	0.0288359	0.0238219	0	0	0.0156738	0.0237756	0	0.0149506	0	0	0	0	0	0.0231381	0	0	0	0.0294133	0	0	0	0
ASV1046	Bacteria	Unclassified Bacteria	Unclassified Bacteria	0	0	0	0	0	0	0	0	0	0	0	0.0469043	0	0	0.0368739	0	0	0	0	0	0	0	0	0	0	0	0	0.0193961	0	0	0	0	0	0	0	0	0	0	0	0	0	0	0	0.0103631	0.0157797	0.0603704
ASV1047	Bacteria	Pseudomonadota	Deltaproteobacteria	0	0	0	0.0406541	0	0	0	0	0	0	0	0.0487805	0	0	0	0	0	0	0	0	0	0	0	0	0	0	0	0.0206083	0	0	0	0	0	0	0	0	0	0	0	0	0	0	0	0	0.0147277	0.0289778
ASV1048	Bacteria	Chloroflexota	Chloroflexia	0	0	0	0	0	0	0.0468325	0.0148709	0	0.0145474	0	0	0	0	0	0	0	0.0244164	0	0	0	0	0.0190714	0.0370285	0	0	0.0236209	0	0	0	0	0	0	0	0.0251826	0	0	0	0	0	0.0515771	0.0166249	0	0	0	0
ASV1049	Bacteria	Acidobacteriota	Unclassified Acidobacteriota	0	0	0	0	0	0	0.0342238	0	0	0	0.0275325	0	0	0	0	0	0	0.0325553	0.066859	0	0	0	0	0	0	0	0.0267704	0	0	0	0	0	0	0	0.0251826	0	0	0	0.0212326	0	0	0.0345286	0.0231877	0	0	0
ASV1050	Bacteria	Pseudomonadota	Gammaproteobacteria	0	0	0	0	0	0	0	0	0	0	0	0	0	0	0	0	0	0	0	0	0	0	0	0	0	0	0	0	0	0	0	0	0	0	0	0	0	0	0	0	0	0	0	0	0.00420791	0.284948
ASV1051	Bacteria	Planctomycetota	Unclassified Planctomycetota	0.0477625	0	0	0	0.0273619	0	0	0	0	0	0	0	0.0406929	0	0	0	0.0214951	0	0	0	0	0	0	0	0	0.0283595	0	0	0.0215515	0.0356633	0.0172706	0	0	0.0197167	0	0	0	0.021692	0	0	0	0	0	0	0	0
ASV1052	Bacteria	Pseudomonadota	Alphaproteobacteria	0.0212278	0	0	0.0632397	0	0	0	0.0386644	0	0	0	0	0	0	0	0	0	0	0	0	0	0	0	0	0	0	0	0	0	0	0	0.0368015	0	0	0	0	0	0	0	0	0	0	0.0289847	0.069087	0	0
ASV1053	Bacteria	Unclassified Bacteria	Unclassified Bacteria	0.0172476	0.00775976	0	0.0331255	0	0	0.0252175	0.00594837	0	0.016972	0.0189879	0	0	0	0.018437	0	0	0.0146499	0	0	0	0	0	0	0	0	0.034644	0	0	0	0	0	0	0	0	0	0.0222101	0	0.0245851	0.0162206	0	0	0	0	0	0
ASV1054	Bacteria	Chloroflexota	Chloroflexia	0.0119406	0.0116396	0	0	0	0	0	0	0	0.0121228	0	0.0300188	0	0	0	0	0	0	0	0	0.0192675	0	0	0	0	0	0	0.0121225	0	0	0	0.0115005	0	0	0.0125913	0	0.0358778	0.0115691	0.0134101	0	0	0.0153461	0	0	0.0284034	0.0193185
ASV1055	Bacteria	Planctomycetota	Planctomycetia	0	0.00096997	0.010937	0.0150571	0	0	0	0.000991395	0	0.0412176	0.0256337	0.0318949	0	0	0	0	0	0	0	0.0452489	0	0	0	0	0	0	0.0220462	0	0	0	0	0	0	0	0	0	0.0170847	0	0.00223501	0	0.0177296	0	0	0.0431794	0	0
ASV1056	Bacteria	Chloroflexota	Chloroflexia	0	0	0	0	0	0	0	0.0208193	0	0	0	0.0506567	0	0	0	0	0	0	0	0	0	0	0	0.033502	0	0	0	0.0497024	0	0	0	0	0	0	0	0	0	0	0	0	0	0	0	0	0.0347153	0.026563
ASV1057	Bacteria	Bacteroidota	Saprospiria	0.0119406	0.0116396	0.0095699	0.0271027	0	0.0229762	0	0.0109053	0.0126668	0	0.0189879	0.0150094	0	0	0	0	0	0.00651105	0	0	0	0	0.0105952	0	0	0	0	0	0	0	0	0	0	0.00492918	0.0240379	0	0	0	0	0	0.022565	0.0102307	0	0	0.00841583	0
ASV1058	Bacteria	Planctomycetota	Unclassified Planctomycetota	0	0	0	0.0210799	0	0	0	0.0158623	0	0	0	0.0393996	0	0	0	0	0	0	0	0	0	0	0.0211905	0.0299755	0	0	0	0.0375799	0	0	0	0	0	0	0	0	0.0153762	0	0	0	0.0370711	0	0	0.0120902	0.0326113	0
ASV1059	Bacteria	Planctomycetota	Unclassified Planctomycetota	0	0	0.0300768	0	0	0	0	0.0277591	0	0	0.0161398	0	0	0.0421996	0.0327768	0	0	0	0	0	0	0	0	0.0634775	0	0	0	0	0	0	0	0	0	0	0	0.0887804	0	0	0	0	0.0209532	0	0	0.0172718	0	0
ASV1060	Bacteria	Acidobacteriota	Vicinamibacteria	0	0	0	0.025597	0	0	0	0	0	0	0.0731036	0	0	0	0	0.0658877	0	0	0.0809346	0	0	0	0	0	0	0	0	0.0193961	0	0	0	0	0	0	0	0	0	0	0.0346427	0	0	0	0	0	0	0
ASV1061	Bacteria	Acidobacteriota	Unclassified Acidobacteriota	0	0.0164895	0.0218741	0	0	0	0.04323	0	0	0.016972	0.014241	0	0	0	0	0	0	0	0	0	0	0.0482218	0.0296667	0.0317388	0	0	0.0251957	0	0	0	0	0	0	0.0213598	0	0	0	0	0.0122926	0	0	0	0	0	0	0
ASV1062	Bacteria	Planctomycetota	Unclassified Planctomycetota	0	0	0	0	0	0.0727579	0	0	0	0.0606141	0.059812	0	0	0	0	0	0	0	0	0	0	0	0	0	0	0	0	0	0	0	0	0	0	0	0.0309059	0	0	0	0	0	0	0	0	0	0	0
ASV1063	Bacteria	Chloroflexota	Chloroflexia	0	0.0242492	0	0.0225856	0	0	0	0.0297418	0.0855012	0	0	0	0	0	0	0	0	0	0	0	0	0	0	0	0	0	0	0	0	0	0	0	0	0	0.0148806	0	0	0	0.00894005	0	0.0290121	0	0	0	0.0147277	0
ASV1064	Bacteria	Acidobacteriota	Unclassified Acidobacteriota	0	0	0.0205069	0.0240913	0.00656685	0	0	0.0118967	0.00791678	0.0133351	0.00759518	0.00938086	0	0.0227228	0.0102428	0	0	0	0	0.0166706	0	0	0	0.0317388	0	0	0.0204715	0.00969803	0	0	0	0	0.0144938	0	0	0	0.0102508	0	0.0122926	0	0.0177296	0	0	0.0103631	0	0
ASV1065	Bacteria	Planctomycetota	Unclassified Planctomycetota	0	0.0193994	0.0287097	0.0195742	0	0	0.0306213	0.0158623	0	0	0.0218361	0	0	0	0.0225341	0	0	0	0	0	0	0	0	0	0	0	0.0157473	0	0	0	0	0	0	0	0.00801264	0	0.0170847	0	0	0	0.0177296	0	0	0.0276348	0	0
ASV1066	Bacteria	Pseudomonadota	Alphaproteobacteria	0	0.00678979	0	0	0	0	0.0126088	0	0.0142502	0.0193965	0.00664578	0	0	0	0.0286797	0	0	0.0195332	0.0246323	0.0261967	0	0	0	0.0123428	0	0	0.0220462	0.0133348	0	0	0	0	0	0	0.0125913	0.0147967	0	0	0.0189976	0	0	0.0191826	0	0.0103631	0	0
ASV1067	Bacteria	Planctomycetota	Unclassified Planctomycetota	0	0	0	0.0135514	0	0	0	0.0188365	0	0	0	0.0356473	0	0	0	0	0	0	0	0	0	0	0	0	0	0	0	0.0266696	0	0	0	0	0	0	0	0	0.0307524	0	0	0	0	0	0	0	0.0389232	0.0217334
ASV1068	Bacteria	Chloroflexota	Chloroflexia	0	0	0	0	0	0.0114881	0	0	0.0174169	0	0	0	0	0	0	0	0	0	0	0	0	0	0.0211905	0	0	0	0	0.0290941	0	0	0	0.00920037	0	0	0.0160253	0	0	0	0.0100576	0	0	0	0	0	0.0294554	0.053126
ASV1069	Bacteria	Verrucomicrobiota	Unclassified Verrucomicrobiota	0.0119406	0.0116396	0.00820277	0	0	0.0153175	0.00900625	0.0208193	0	0.0121228	0.00759518	0	0	0	0	0	0	0.00976658	0	0.0285782	0	0	0.0105952	0.0176326	0	0	0	0	0	0	0	0.0115005	0	0	0.0091573	0	0.0170847	0	0.00782254	0	0.00967071	0.0166249	0	0.0155446	0	0
ASV1070	Bacteria	Planctomycetota	Planctomycetia	0	0.0242492	0	0	0	0	0.0180125	0	0	0.0230334	0.0322795	0	0	0	0.040971	0	0	0	0	0	0	0	0	0	0	0	0	0	0.0117554	0	0	0.00805033	0	0	0	0	0	0.0187997	0	0	0	0	0	0.0604511	0	0
ASV1071	Bacteria	Pseudomonadota	Alphaproteobacteria	0	0	0.031444	0	0	0	0	0	0	0	0.0265831	0	0	0	0	0.0746728	0	0.0260442	0	0.0309598	0	0	0	0.0617142	0	0	0	0	0	0	0	0	0	0	0	0	0.0324609	0	0	0.0532963	0	0	0	0	0	0
ASV1072	Bacteria	Chloroflexota	Chloroflexia	0	0	0.0246083	0.0271027	0	0	0	0.0138795	0	0	0	0.0243902	0	0	0	0.0702802	0	0	0	0	0	0	0	0	0	0	0	0.0157593	0	0	0	0	0	0	0	0	0	0	0	0.0718341	0.0370711	0	0	0.0379979	0.00631187	0
ASV1073	Bacteria	Chloroflexota	Chloroflexia	0.0159208	0	0	0	0	0	0	0	0	0	0	0	0	0	0	0	0.0238834	0	0	0	0.0177854	0	0	0	0.0109851	0.0226876	0	0	0.0293884	0.0376446	0.0431764	0.0149506	0	0.0230029	0	0	0	0.0159074	0	0	0	0	0	0	0	0
ASV1074	Bacteria	Pseudomonadota	Deltaproteobacteria	0	0	0	0	0	0	0	0	0	0	0	0	0	0	0	0	0	0	0	0	0	0	0	0	0	0	0	0	0.111676	0	0	0	0	0	0	0	0	0.0867679	0	0	0	0	0	0	0	0
ASV1075	Bacteria	Planctomycetota	Planctomycetia	0	0.031039	0	0	0.0350232	0.0689285	0.0612425	0.000991395	0	0	0	0	0	0	0.0143399	0	0	0.0504607	0	0	0	0	0	0	0	0	0	0	0	0	0	0	0	0	0	0	0	0	0	0	0	0	0	0	0	0
ASV1076	Bacteria	Pseudomonadota	Deltaproteobacteria	0	0	0.0259754	0.0526997	0	0	0	0	0	0	0.0151904	0.0150094	0	0	0.0348254	0	0	0	0	0	0	0	0	0.033502	0	0	0	0	0	0	0	0	0	0	0	0.0443902	0	0	0	0.0556135	0	0	0	0.039725	0	0
ASV1077	Bacteria	Chloroflexota	Chloroflexia	0.0517427	0	0	0	0	0	0	0	0	0	0	0	0	0	0	0	0	0	0	0	0	0	0	0	0	0.051047	0	0	0.030368	0	0.0639011	0	0.0483127	0	0	0	0	0	0	0	0	0	0	0	0	0
ASV1078	Unknown	Unknown	Unknown	0	0	0	0	0.0120392	0	0	0	0	0	0	0	0	0.0357073	0	0	0.0143301	0	0	0	0	0	0	0	0	0	0	0	0	0	0	0	0	0.0164306	0.0183146	0	0	0	0.0145276	0.0486618	0	0	0	0	0.0315593	0.0386371
ASV1079	Bacteria	Pseudomonadota	Deltaproteobacteria	0	0	0	0	0	0	0	0	0	0	0	0	0	0	0	0	0	0	0	0	0	0	0	0	0	0	0	0	0	0	0	0	0	0	0	0	0	0	0	0	0	0.21996	0	0	0	0
ASV1080	Bacteria	Acidobacteriota	Terriglobia	0	0	0	0.0316198	0	0	0	0.0337074	0	0	0.0313301	0	0	0	0	0.0658877	0	0	0	0	0	0	0	0	0	0	0	0.0278818	0	0	0	0	0	0	0	0	0.0222101	0	0	0	0.0338475	0	0	0.0189989	0	0
ASV1081	Bacteria	Chloroflexota	Dehalococcoidia	0	0	0	0.0120457	0	0	0	0	0	0	0	0.0393996	0	0	0	0	0	0	0	0	0	0	0	0.0299755	0	0	0	0.0484901	0	0	0	0	0	0	0	0	0	0.0231381	0	0	0.0354593	0	0	0	0.0294554	0
ASV1082	Bacteria	Pseudomonadota	Deltaproteobacteria	0	0	0	0	0	0	0	0	0	0	0	0.0675422	0	0	0	0	0	0	0	0	0	0	0	0	0	0	0	0.0630372	0	0	0	0	0	0	0	0	0	0	0	0	0	0	0	0	0.0178836	0.0434667
ASV1083	Bacteria	Chloroflexota	Chloroflexia	0.00928715	0.0126096	0	0	0.022984	0.0153175	0.0306213	0	0.0142502	0.0218211	0	0	0	0	0.0245826	0	0	0.0146499	0	0	0.0103748	0	0	0	0.0123582	0	0	0	0	0	0	0	0	0	0.0171699	0	0	0	0.0111751	0.0185378	0	0	0.0202893	0	0	0
ASV1084	Bacteria	Acidobacteriota	Unclassified Acidobacteriota	0	0	0	0	0	0	0	0.032716	0	0	0	0	0	0	0	0	0	0	0	0	0	0	0	0.0511347	0	0	0	0	0	0	0	0	0	0	0	0.0665853	0.0392947	0	0	0	0.0145061	0	0	0	0.0252475	0
ASV1085	Bacteria	Pseudomonadota	Deltaproteobacteria	0	0	0	0	0	0	0	0	0	0	0	0	0	0	0	0	0	0	0	0	0	0	0	0	0	0.0555845	0	0	0.0764099	0.033682	0	0	0	0	0	0	0	0.0375994	0	0	0	0	0	0	0	0
ASV1086	Bacteria	Planctomycetota	Unclassified Planctomycetota	0.0212278	0.0164895	0	0	0.022984	0	0.0306213	0	0	0	0	0	0	0	0	0	0.0191068	0	0	0	0	0	0.0211905	0	0.0137314	0	0	0	0	0	0	0.00805033	0	0.0213598	0.0160253	0	0	0.0202458	0.00894005	0	0	0.0191826	0	0	0	0
ASV1087	Bacteria	Chloroflexota	Chloroflexia	0.0172476	0.0106697	0	0	0.0109448	0.0268055	0.0270188	0	0.0126668	0.0230334	0	0	0	0	0	0	0.0167184	0	0	0	0.0237139	0	0	0	0.0178508	0	0.00629892	0	0	0	0	0	0.0193251	0	0.0171699	0	0	0	0.00894005	0	0	0.0102307	0	0	0	0
ASV1088	Bacteria	Actinomycetota	Unclassified Actinomycetota	0	0.032979	0	0	0	0.0306349	0	0	0	0	0	0	0	0	0	0	0	0	0	0	0	0	0	0	0.0343284	0	0	0	0	0	0	0	0	0	0.0286166	0	0	0	0.0357602	0	0	0.047317	0	0	0	0
ASV1089	Bacteria	Chloroflexota	Dehalococcoidia	0	0	0.0164055	0.0271027	0	0.0210615	0	0.0247849	0	0	0.0113928	0.0262664	0	0	0.0163884	0	0	0	0	0	0	0	0	0	0	0	0.0220462	0.0375799	0	0	0	0	0	0	0	0	0	0	0	0	0.0161179	0	0	0.0138174	0.00631187	0
ASV1090	Bacteria	Pseudomonadota	Gammaproteobacteria	0	0	0.0451152	0.0301141	0	0	0	0.00198279	0	0	0.00664578	0	0	0	0.0450681	0	0	0	0	0	0	0	0	0	0	0	0	0.00727352	0	0	0	0	0	0	0	0	0	0	0	0	0	0	0	0	0.0189356	0.0627853
ASV1091	Bacteria	Pseudomonadota	Alphaproteobacteria	0	0	0	0.0210799	0	0	0	0	0	0.0121228	0	0	0	0	0	0	0	0	0	0	0	0	0	0	0	0	0.0377935	0.0387921	0	0	0	0	0	0	0.0148806	0	0	0	0.0178801	0	0	0	0	0.0535424	0.0189356	0
ASV1092	Bacteria	Chloroflexota	Dehalococcoidia	0.00928715	0	0	0	0.0240785	0	0	0	0	0	0	0	0	0	0	0	0	0.0130221	0	0	0.0296424	0.0144665	0	0	0.0178508	0	0	0	0.0146942	0.0118878	0.0120894	0.0195508	0	0.0345043	0.00801264	0	0	0	0	0	0	0.0230191	0	0	0	0
ASV1093	Bacteria	Acidobacteriota	Unclassified Acidobacteriota	0	0.00484985	0.00820277	0.0150571	0.00985028	0.0210615	0	0.00793116	0	0	0.00759518	0.011257	0	0	0.0081942	0	0	0	0	0	0	0	0	0.0141061	0	0	0.0188967	0.0206083	0	0	0	0	0	0	0	0.0295935	0.0205016	0	0	0.0231723	0.00805893	0.00639419	0	0.0103631	0.0115718	0.0144889
ASV1094	Bacteria	Chloroflexota	Chloroflexia	0	0	0	0.0120457	0	0	0	0.00793116	0	0	0	0.0225141	0	0	0.0102428	0	0	0	0	0	0	0	0	0.0158694	0	0	0	0.0290941	0	0	0	0	0	0	0	0	0	0	0	0	0	0	0	0	0.0262995	0.0410519
ASV1095	Bacteria	Acidobacteriota	Unclassified Acidobacteriota	0	0	0	0	0.0131337	0	0	0.0148709	0	0	0	0	0	0	0	0	0	0.0211609	0	0	0.0414993	0	0	0	0	0.0351657	0	0	0.038205	0.0356633	0	0	0	0	0	0	0	0	0	0	0	0.0140672	0	0	0	0
ASV1096	Bacteria	Acidobacteriota	Vicinamibacteria	0.0358218	0.0096997	0	0	0.0251729	0	0	0	0.0190003	0	0	0	0	0	0	0	0	0	0	0	0.0148212	0	0	0	0	0	0	0	0	0	0.02936	0	0	0.027932	0	0	0	0.0433839	0	0	0	0.0268556	0	0	0	0
ASV1097	Bacteria	Pseudomonadota	Deltaproteobacteria	0	0	0	0	0	0.0229762	0.0234163	0	0	0.0278825	0.0113928	0	0	0	0	0	0	0	0.0492646	0	0	0.0337553	0	0	0	0	0	0	0.0205719	0.0138691	0	0	0	0	0.0309059	0	0	0	0.0134101	0	0	0	0.0347816	0	0	0
ASV1098	Bacteria	Unclassified Bacteria	Unclassified Bacteria	0.0172476	0.00581982	0	0	0.00985028	0	0	0	0.0126668	0	0	0	0.0465062	0	0	0	0	0.00976658	0	0	0.0148212	0	0	0	0	0.0170157	0	0	0.0205719	0.0217943	0.0189976	0.0149506	0.0144938	0.0213598	0	0	0	0.0130152	0	0	0	0.00895186	0	0	0	0
ASV1099	Bacteria	Unclassified Bacteria	Unclassified Bacteria	0	0	0.0300768	0	0	0	0	0	0	0	0	0.0187617	0	0.0324612	0	0	0.0310485	0	0	0	0	0.026522	0	0.0158694	0	0	0	0	0	0	0	0	0	0	0.0515098	0	0	0	0.0234676	0	0.0354593	0	0.0086954	0	0	0
ASV1100	Bacteria	Chloroflexota	Dehalococcoidia	0	0	0	0.0180685	0	0	0	0.0109053	0	0	0	0.0450281	0	0	0	0.0790653	0	0	0	0	0	0	0	0.0246857	0	0	0	0	0	0	0	0	0	0	0	0	0.0358778	0	0	0	0.0386828	0	0	0.0241805	0.0136757	0
ASV1101	Bacteria	Pseudomonadota	Deltaproteobacteria	0.025208	0.0339489	0	0	0.0251729	0	0	0	0.0174169	0.0218211	0	0	0	0	0	0	0	0	0	0	0	0	0	0	0.00823882	0	0	0	0.0166534	0	0	0.0207008	0.0169094	0.0180737	0	0	0	0	0	0	0	0	0	0	0	0
ASV1102	Bacteria	Acidobacteriota	Unclassified Acidobacteriota	0.019901	0	0	0	0	0	0	0	0.026917	0	0	0	0	0	0	0	0.0238834	0	0	0	0	0	0	0	0.0178508	0	0	0	0.0176331	0.0237756	0.0259058	0.0287512	0	0.0394335	0	0	0	0.0231381	0	0	0	0	0	0	0	0
ASV1103	Bacteria	Chloroflexota	Chloroflexia	0	0.0572282	0	0	0	0	0.190933	0	0	0	0	0	0	0	0	0	0	0	0	0	0	0	0	0	0	0	0	0	0	0	0	0	0	0	0	0	0	0	0	0	0	0	0	0	0	0
ASV1104	Bacteria	Chloroflexota	Chloroflexia	0	0	0.010937	0.0150571	0	0	0	0.0109053	0	0.00969826	0.0161398	0.011257	0	0.0227228	0.0450681	0.0219626	0	0.0113943	0	0.0166706	0.00889271	0	0	0	0	0	0.00944837	0	0	0	0	0	0	0.00821531	0	0.0147967	0.0187931	0	0.0100576	0.0208551	0	0.00895186	0	0	0	0
ASV1105	Bacteria	Pseudomonadota	Alphaproteobacteria	0	0	0	0.197248	0	0	0	0.00991395	0	0	0	0	0	0	0	0	0	0	0	0.00476304	0	0	0	0	0	0	0	0	0	0	0	0.00920037	0	0	0	0	0	0	0	0	0	0	0.0405785	0	0	0
ASV1106	Bacteria	Planctomycetota	Unclassified Planctomycetota	0	0	0.0218741	0.0301141	0	0.0325496	0	0.0228021	0	0.0254579	0.0151904	0	0	0	0	0	0	0	0	0	0	0	0	0	0	0	0	0	0	0	0	0	0	0	0	0	0.0478371	0	0	0	0.0241768	0	0	0.0155446	0	0
ASV1107	Bacteria	Pseudomonadota	Unclassified Pseudomonadota	0	0.0349189	0	0	0.0492514	0	0.0468325	0	0	0	0	0	0	0	0	0	0	0	0	0	0	0	0	0	0	0	0	0	0.0166534	0	0	0	0	0	0.0343399	0	0	0	0	0	0	0	0.0318831	0	0	0
ASV1108	Bacteria	Chloroflexota	Chloroflexia	0	0	0	0	0.0043779	0	0	0.0307332	0	0	0	0.0243902	0	0.025969	0	0	0	0	0	0	0.0103748	0.0192887	0	0	0	0.0113438	0	0.0254573	0	0	0	0	0	0	0.010302	0	0	0	0	0	0.0193414	0	0	0	0.0126237	0.0362223
ASV1109	Bacteria	Pseudomonadota	Gammaproteobacteria	0	0	0.0341782	0	0	0	0	0	0.0696677	0	0	0	0	0	0	0	0	0	0	0	0	0	0	0	0.130448	0	0	0	0	0	0	0	0	0	0	0	0	0	0	0	0	0	0	0	0	0
ASV1110	Bacteria	Acidobacteriota	Terriglobia	0	0	0	0.025597	0	0	0	0.0158623	0	0	0	0.0356473	0	0	0.0348254	0	0	0	0	0	0	0	0.0296667	0.033502	0	0	0	0.0230328	0	0	0	0	0	0	0	0.0665853	0	0	0	0	0	0	0	0.0172718	0	0
ASV1111	Bacteria	Pseudomonadota	Unclassified Pseudomonadota	0	0	0	0	0	0	0	0	0	0	0.0199373	0	0	0	0.116767	0	0	0	0	0	0	0	0	0	0	0	0	0	0	0	0	0	0	0	0	0	0.0820064	0	0	0	0	0	0	0.0656327	0	0
ASV1112	Bacteria	Pseudomonadota	Alphaproteobacteria	0	0	0	0	0	0	0	0	0	0	0	0	0	0	0	0	0	0	0	0	0	0	0	0	0	0.0431064	0	0	0.0803284	0	0.0759905	0	0	0	0	0	0	0	0	0	0	0	0	0	0	0
ASV1113	Bacteria	Pseudomonadota	Alphaproteobacteria	0	0	0	0.0271027	0	0	0	0.0218107	0	0	0	0.0262664	0	0	0	0	0	0	0	0	0	0	0.0233095	0	0	0	0	0.0339431	0	0	0	0	0	0	0	0	0.0153762	0	0	0.0393929	0.0483536	0	0	0	0.0157797	0
ASV1114	Bacteria	Chloroflexota	Chloroflexia	0	0	0.0095699	0	0	0	0	0.037673	0	0	0.00759518	0.0356473	0	0	0.0266312	0	0	0	0	0	0	0	0	0	0	0	0.0157473	0.0254573	0	0	0	0	0	0	0	0	0.0153762	0	0.0100576	0	0.0177296	0	0	0.0189989	0.00736385	0
ASV1115	Bacteria	Chloroflexota	Chloroflexia	0	0	0	0	0	0	0	0.0178451	0	0	0.0218361	0.0225141	0	0	0	0	0	0	0	0	0	0	0	0.0476081	0	0	0.0220462	0.0315186	0	0	0	0	0	0	0.0366292	0	0.0187931	0	0	0	0	0	0	0	0	0
ASV1116	Archaea	Methanobacteriota	Unclassified Methanobacteriota	0	0	0	0	0	0	0	0	0	0	0	0	0	0	0	0	0	0	0	0	0	0	0	0	0	0	0	0	0	0	0	0	0	0	0	0	0	0	0	0	0	0	0	0	0.0168317	0.0772742
ASV1117	Bacteria	Unclassified Bacteria	Unclassified Bacteria	0.0159208	0.0126096	0	0	0	0.0306349	0.01441	0	0.00950013	0.0266702	0.00759518	0	0	0	0	0	0	0.00976658	0	0	0	0	0	0	0	0	0	0	0.00587769	0	0.00518117	0	0	0.0147876	0.0217486	0	0	0	0.0145276	0	0	0.0102307	0.0405785	0	0	0
ASV1118	Bacteria	Pseudomonadota	Deltaproteobacteria	0	0	0	0	0	0	0	0	0	0	0	0	0	0	0	0	0	0	0	0	0	0	0	0	0	0	0	0	0	0	0	0.187458	0	0	0	0	0	0	0	0	0	0	0	0	0	0
ASV1119	Bacteria	Acidobacteriota	Unclassified Acidobacteriota	0	0.0203694	0	0	0	0.047867	0.036025	0	0	0.0375808	0	0	0	0.0421996	0	0	0	0.0292997	0	0	0	0.0409885	0	0	0	0	0	0	0	0	0	0	0	0	0	0	0	0	0.0189976	0	0	0	0	0	0	0
ASV1120	Bacteria	Planctomycetota	Planctomycetia	0	0.0145495	0	0	0	0.0153175	0	0.0138795	0	0	0.0170891	0.0506567	0	0	0	0	0	0	0	0	0	0.0120555	0.0169524	0	0	0	0	0.0339431	0	0	0	0	0	0	0	0	0	0	0	0	0	0	0	0	0.0252475	0.0169037
ASV1121	Bacteria	Planctomycetota	Unclassified Planctomycetota	0	0	0.0177727	0.0466769	0	0	0	0.0277591	0	0	0	0	0	0	0	0	0	0	0	0	0	0	0	0	0	0	0	0.0400044	0	0	0	0	0	0	0	0	0	0	0	0	0.0354593	0	0	0	0.0315593	0
ASV1122	Bacteria	Verrucomicrobiota	Verrucomicrobiia	0.0238812	0	0	0	0.0175116	0	0	0	0	0	0	0	0	0	0	0	0	0	0	0	0	0	0	0	0.0247164	0	0	0	0.0607361	0.0257569	0.0431764	0	0	0	0	0	0	0	0	0	0	0.0115095	0	0	0	0
ASV1123	Bacteria	Chloroflexota	Chloroflexia	0	0	0	0	0	0	0	0	0	0	0	0	0	0	0	0	0	0	0	0	0	0	0	0	0	0	0	0	0	0	0	0	0	0	0	0	0	0	0	0	0	0	0	0	0.0568068	0.101422
ASV1124	Bacteria	Candidatus Poribacteriota	Unclassified candidatus Poribacteriota	0	0	0.0669893	0.0707682	0	0	0	0	0	0	0.0522168	0.0168856	0	0	0	0	0	0	0	0	0	0	0	0	0	0	0	0	0	0	0	0	0	0	0	0	0	0	0	0	0	0	0	0	0	0
ASV1125	Bacteria	Pseudomonadota	Alphaproteobacteria	0.108792	0	0	0.0632397	0	0	0	0	0	0	0	0	0	0	0	0	0	0	0	0	0	0	0	0	0	0	0	0	0	0	0	0	0	0	0	0	0	0	0	0.0787858	0	0	0	0	0	0
ASV1126	Bacteria	Acidobacteriota	Unclassified Acidobacteriota	0	0	0.00273426	0	0	0	0	0.000991395	0	0	0.0151904	0	0	0	0.0389225	0.0834578	0	0	0	0.0762086	0	0	0	0.00176326	0	0	0.0393682	0	0	0	0	0	0	0	0	0.081382	0.00854234	0	0	0	0.00322357	0	0	0.0138174	0	0
ASV1127	Bacteria	Pseudomonadota	Alphaproteobacteria	0	0	0	0.0496883	0	0	0	0.0535353	0	0	0.0227855	0	0	0	0	0	0	0	0	0	0	0	0	0	0	0	0.0299198	0	0	0	0	0	0	0	0	0	0.025627	0	0	0	0.0209532	0	0	0	0	0
ASV1128	Bacteria	Pseudomonadota	Gammaproteobacteria	0	0	0	0	0	0	0	0.0188365	0	0	0	0	0	0	0	0	0	0	0	0	0	0	0	0	0.0178508	0	0	0.0375799	0	0	0	0	0	0	0.0206039	0	0	0	0	0	0.0628596	0	0.0492739	0	0.0210396	0
ASV1129	Bacteria	Acidobacteriota	Unclassified Acidobacteriota	0.019901	0.0164895	0	0	0	0	0	0	0.0110835	0.0157597	0	0	0	0	0	0	0.0262718	0	0	0	0.0192675	0	0	0	0	0.0238219	0	0	0	0.0277382	0	0	0.0217407	0	0	0	0	0.0159074	0	0	0	0.0179037	0.0318831	0	0	0
ASV1130	Bacteria	Actinomycetota	Unclassified Actinomycetota	0	0	0	0.0240913	0	0	0	0.0257763	0	0	0	0.0262664	0	0	0	0.0395326	0	0	0	0	0	0	0	0.026449	0	0	0	0.0218206	0	0	0	0	0	0	0	0	0	0	0	0	0	0	0	0	0.0273514	0.0193185
ASV1131	Bacteria	Pseudomonadota	Gammaproteobacteria	0	0	0	0	0	0	0	0	0	0	0	0	0	0	0	0	0	0	0	0	0	0	0	0	0	0	0	0	0	0	0	0	0	0	0.10302	0	0	0	0	0	0	0.0844033	0	0	0	0
ASV1132	Bacteria	Chloroflexota	Chloroflexia	0	0	0	0.00752853	0	0.0134028	0	0.0198279	0	0.00606141	0	0.0131332	0	0	0	0	0	0	0	0	0	0	0	0.0158694	0	0	0.0188967	0.0242451	0	0	0	0	0	0	0	0	0.0136677	0	0.0134101	0.0139034	0.0128943	0	0	0.0207261	0.0262995	0
ASV1133	Bacteria	Bacteroidota	Flavobacteriia	0.00928715	0	0	0	0.0087558	0	0	0.0148709	0	0	0.014241	0.0168856	0	0.0194767	0	0	0	0.0130221	0	0	0	0	0	0	0.0137314	0.0136125	0	0	0	0	0	0	0.0193251	0	0.010302	0.0332926	0.0102508	0	0.0245851	0.0115861	0	0.00767303	0	0	0	0
ASV1134	Bacteria	Pseudomonadota	Alphaproteobacteria	0	0	0.0341782	0	0	0	0	0	0	0	0.0294313	0.0356473	0	0	0	0	0	0	0	0	0	0	0	0	0	0	0.0456671	0	0	0	0	0	0	0	0.0206039	0	0	0	0.0368777	0	0	0	0	0	0	0
ASV1135	Bacteria	Planctomycetota	Planctomycetia	0	0	0	0.0376427	0	0	0	0.0356902	0	0	0	0.0412758	0	0	0.0286797	0	0	0	0	0	0	0	0	0	0	0	0.0251957	0	0	0	0	0	0	0	0	0	0	0	0	0	0	0	0	0.0241805	0.0220915	0
ASV1136	Bacteria	Chloroflexota	Unclassified Chloroflexota	0	0	0	0	0.00656685	0.0134028	0	0.00594837	0.00950013	0	0.0123422	0	0	0	0.0348254	0	0	0.00813882	0	0	0	0	0	0.00705306	0	0.00453751	0.00944837	0	0.012735	0.00792519	0	0	0	0.0115014	0.0263272	0	0	0.0187997	0.0100576	0.0139034	0.00967071	0	0	0	0	0
ASV1137	Bacteria	Pseudomonadota	Deltaproteobacteria	0	0.0174595	0	0	0.0164171	0.042123	0.0270188	0	0	0.0157597	0	0	0	0.0292151	0	0	0.0214951	0.0260442	0	0	0	0	0.0190714	0	0	0	0	0	0	0	0	0	0.0169094	0	0.0148806	0	0	0	0.0100576	0	0	0	0	0	0	0
ASV1138	Bacteria	Unclassified Bacteria	Unclassified Bacteria	0	0	0	0	0	0	0	0	0	0	0	0	0	0	0	0	0	0	0	0	0	0	0	0	0	0	0	0.0424289	0	0	0	0	0	0	0	0	0	0	0	0	0	0	0	0	0.0810023	0
ASV1139	Bacteria	Unclassified Bacteria	Unclassified Bacteria	0	0	0.010937	0.0316198	0	0	0.01441	0.0247849	0	0	0	0.0337711	0	0	0.018437	0	0	0	0	0	0	0	0	0.0229224	0	0	0.0314946	0	0	0	0	0	0	0	0	0	0.0187931	0	0	0	0.0338475	0	0	0	0	0
ASV1140	Bacteria	Pseudomonadota	Unclassified Pseudomonadota	0	0	0	0.0210799	0	0	0	0.00991395	0	0	0.0170891	0.0131332	0	0	0.0081942	0	0	0	0	0.0142891	0	0	0	0.0176326	0	0	0.017322	0	0	0	0	0	0	0	0	0.0147967	0.0119593	0	0	0.0254895	0.0128943	0	0	0.00863588	0.00736385	0
ASV1141	Bacteria	Acidobacteriota	Vicinamibacteria	0	0	0	0	0	0	0	0	0	0	0	0	0	0	0	0	0	0	0	0	0	0	0	0	0	0	0	0.0569759	0	0	0	0	0	0	0	0	0	0	0	0	0	0	0	0	0.0326113	0.0652001
ASV1142	Bacteria	Chloroflexota	Chloroflexia	0	0	0.0232412	0.0165628	0	0	0	0.0128881	0	0	0.0275325	0	0	0	0	0	0	0	0	0	0	0	0	0.0528979	0	0	0	0	0	0	0	0	0	0	0	0	0	0	0	0.0370757	0.0354593	0	0	0.0259076	0	0
ASV1143	Bacteria	Pseudomonadota	Deltaproteobacteria	0	0	0	0	0.020795	0.0134028	0	0	0	0.00848598	0	0	0	0	0	0	0.0262718	0	0	0	0	0	0	0	0.0315821	0.0306282	0	0	0.0137146	0.0178317	0	0.0115005	0	0.0180737	0	0	0	0	0	0	0	0.0191826	0	0	0	0
ASV1144	Bacteria	Chloroflexota	Chloroflexia	0	0	0	0	0	0.0248909	0.0270188	0	0	0	0	0	0	0.0389535	0	0	0.0310485	0	0	0	0.025196	0	0	0	0	0	0	0	0	0	0	0	0	0	0.0171699	0.0961787	0	0	0.0290551	0	0	0.0191826	0	0	0	0
ASV1145	Bacteria	Acidobacteriota	Unclassified Acidobacteriota	0.019901	0	0	0	0.0240785	0	0	0	0	0	0	0	0	0	0	0	0.0358252	0	0	0	0.0148212	0	0	0	0	0.0294938	0	0	0.0293884	0	0	0	0	0.0345043	0	0	0	0.0173536	0	0	0	0	0	0	0	0
ASV1146	Bacteria	Verrucomicrobiota	Opitutia	0.00663368	0.0106697	0.0095699	0	0.0131337	0	0	0.0228021	0	0	0	0	0	0	0	0	0	0.00651105	0	0.0166706	0.00889271	0	0	0	0	0.00567189	0.00944837	0	0	0	0	0	0	0	0.0148806	0.0221951	0.0170847	0	0.0178801	0	0	0	0	0	0.0147277	0
ASV1147	Bacteria	Chloroflexota	Chloroflexia	0	0	0	0	0.0240785	0	0	0	0.0348338	0.0606141	0	0	0	0	0	0	0	0.0260442	0	0	0	0	0	0	0	0.0238219	0	0	0	0	0	0	0	0	0	0	0	0	0	0	0	0.0255768	0	0	0	0
ASV1148	Bacteria	Chloroflexota	Dehalococcoidia	0	0	0	0	0.0142282	0	0	0	0	0	0	0	0	0.0421996	0	0	0	0	0	0	0.0133391	0	0.0211905	0	0.0164776	0.0102094	0	0	0	0	0.0120894	0.0207008	0.0120782	0	0.0240379	0	0	0.0115691	0.0145276	0	0	0.0166249	0	0	0	0
ASV1149	Bacteria	Chloroflexota	Chloroflexia	0.0159208	0	0	0	0	0	0	0	0	0	0	0	0	0	0	0	0	0.0390663	0	0	0.0266781	0	0	0	0.0274627	0.0158813	0	0	0	0	0	0	0.0120782	0.0328612	0	0	0	0	0.0257026	0	0	0.0179037	0	0	0	0
ASV1150	Bacteria	Unclassified Bacteria	Unclassified Bacteria	0	0.0232793	0	0	0	0	0	0	0	0.0363685	0	0	0	0	0	0	0	0	0	0	0	0	0	0	0	0	0	0.0315186	0	0	0	0.0276011	0	0.0312182	0	0	0.0273355	0	0	0	0	0	0.0318831	0	0	0
ASV1151	Bacteria	Unclassified Bacteria	Unclassified Bacteria	0	0	0	0	0	0	0.0198138	0	0.0190003	0.0181842	0	0	0	0	0	0	0	0.0325553	0	0	0	0	0	0	0.0411941	0	0	0	0	0	0	0	0.026572	0	0.0160253	0	0	0	0.0279376	0	0	0	0.0347816	0	0	0
ASV1152	Bacteria	Chloroflexota	Chloroflexia	0	0	0	0	0	0	0	0.0168537	0	0	0.0227855	0	0	0	0.0450681	0.0307476	0	0	0	0	0	0	0	0.0282122	0	0	0.0330693	0.0109103	0	0	0	0	0	0	0	0	0.0273355	0	0	0	0.0145061	0	0	0.0155446	0	0
ASV1153	Bacteria	Chloroflexota	Chloroflexia	0	0	0	0	0	0	0	0	0	0	0	0.0337711	0	0	0	0	0	0	0	0	0	0	0	0	0	0	0	0.0315186	0	0	0	0	0	0	0	0	0.0307524	0	0	0.0324412	0.0209532	0	0	0.0172718	0.0389232	0
ASV1154	Bacteria	Chloroflexota	Chloroflexia	0.00796041	0.0096997	0	0.0316198	0	0	0	0	0	0	0.00854457	0	0	0	0	0	0	0	0	0	0	0	0.0233095	0	0	0	0.0125978	0	0.00489807	0	0	0.0126505	0	0.0115014	0	0	0.0136677	0	0	0	0	0	0	0	0.0294554	0.0386371
ASV1155	Archaea	Unclassified Archaea	Unclassified Archaea	0	0	0	0	0	0	0	0	0	0	0	0	0	0	0	0	0	0	0	0	0	0	0	0	0	0	0	0	0	0	0	0	0	0	0	0	0	0	0	0	0	0	0	0	0	0.0507112
ASV1156	Bacteria	Chloroflexota	Chloroflexia	0	0.0203694	0	0	0	0	0	0	0	0	0.0265831	0	0	0	0	0	0	0	0	0	0	0	0	0	0	0	0	0	0	0	0	0.025301	0	0	0.0240379	0	0	0	0.0324077	0	0	0.0345286	0	0	0	0
ASV1157	Bacteria	Pseudomonadota	Alphaproteobacteria	0	0.0116396	0	0	0.0087558	0	0.0342238	0	0	0.00969826	0	0	0	0	0	0	0	0	0	0	0	0	0	0.0123428	0.0123582	0	0	0.0448534	0.0068573	0	0	0.0103504	0	0	0.0171699	0	0	0	0	0	0	0	0	0	0	0.0193185
ASV1158	Bacteria	Chloroflexota	Chloroflexia	0	0	0	0	0	0	0	0	0	0	0	0	0	0	0	0	0	0	0	0	0	0	0	0	0	0	0	0	0	0	0	0	0	0	0	0	0	0	0	0	0	0	0	0	0.0410272	0.0579556
ASV1159	Bacteria	Chloroflexota	Chloroflexia	0	0	0	0.051194	0	0	0	0	0	0	0	0	0	0	0	0.0614952	0	0	0	0	0	0	0	0	0	0	0	0.0387921	0	0	0	0	0	0	0	0	0	0	0	0	0.0145061	0	0	0.0276348	0.0452351	0
ASV1160	Bacteria	Chloroflexota	Dehalococcoidia	0	0.0096997	0	0	0	0.0191468	0.0180125	0	0	0.0133351	0.0256337	0	0	0	0.0266312	0	0	0	0	0	0	0.0361664	0	0.0317388	0	0	0	0	0	0	0	0	0	0	0.0160253	0	0	0	0	0	0.0306239	0	0	0	0	0
ASV1161	Bacteria	Chloroflexota	Chloroflexia	0	0	0	0	0	0	0.106274	0	0	0	0.0674072	0	0	0	0	0	0	0	0	0	0	0	0	0	0	0	0	0	0	0	0	0	0	0	0.0183146	0	0	0	0	0	0	0	0	0	0	0
ASV1162	Bacteria	Unclassified Bacteria	Unclassified Bacteria	0	0	0.0191398	0	0	0	0.01441	0.00991395	0	0	0.0218361	0	0	0.0292151	0	0	0	0.0146499	0	0	0.00741059	0	0.0127143	0	0	0	0.0125978	0.00727352	0	0.00792519	0.00863528	0	0.0120782	0	0	0	0.0102508	0.00867679	0.00447002	0	0	0	0	0.0224533	0.00525989	0
ASV1163	Bacteria	Pseudomonadota	Alphaproteobacteria	0	0.0096997	0	0	0	0	0	0.0208193	0.0126668	0.00969826	0	0.0243902	0	0	0.0245826	0.0395326	0	0.00813882	0	0.0190522	0.0207497	0	0	0	0	0	0	0	0	0	0	0	0	0	0.0125913	0	0.0205016	0	0.0156451	0	0	0	0	0	0	0
ASV1164	Bacteria	Pseudomonadota	Gammaproteobacteria	0	0.00581982	0	0.0225856	0	0	0	0.0178451	0	0	0.00474699	0.0206379	0	0	0.0225341	0	0	0	0	0.0190522	0	0	0	0.0105796	0	0	0	0.0351554	0	0	0	0.00460019	0	0	0	0	0	0	0.00782254	0.0185378	0.0161179	0	0	0	0.00736385	0
ASV1165	Bacteria	Bacillota	Bacilli	0	0	0.00820277	0.0120457	0.00328343	0.0134028	0.0108075	0.00892255	0	0.00969826	0.0132916	0.011257	0	0	0.0081942	0	0	0.00325553	0	0.0119076	0	0	0.0105952	0	0	0	0.00787364	0.00727352	0	0	0	0	0	0	0	0.0184959	0.0290439	0	0.0134101	0.00926891	0	0	0	0	0.00525989	0.0193185
ASV1166	Bacteria	Chloroflexota	Dehalococcoidia	0	0	0	0	0	0	0	0	0	0	0	0.0206379	0	0	0.0286797	0	0	0	0	0	0.0207497	0	0.0254286	0	0	0	0	0	0	0.0138691	0	0	0.026572	0	0	0	0	0.0187997	0	0.0231723	0	0	0	0	0.0210396	0.0144889
ASV1167	Bacteria	Chloroflexota	Chloroflexia	0	0.00484985	0	0	0.0109448	0.0114881	0	0	0	0.0121228	0	0	0	0	0	0	0	0.0390663	0	0	0.0148212	0	0.0148333	0	0.0109851	0.0102094	0	0	0	0	0.0138164	0.00805033	0	0.00985837	0.00801264	0	0	0	0.0212326	0	0	0.0102307	0	0	0	0
ASV1168	Bacteria	Chloroflexota	Dehalococcoidia	0	0	0	0.0150571	0	0	0	0	0	0	0.00664578	0.0450281	0	0	0	0	0	0	0	0	0	0	0	0	0	0	0	0	0	0	0	0	0	0	0	0	0	0	0	0	0	0	0	0.0224533	0.0241955	0.0362223
ASV1169	Bacteria	Unclassified Bacteria	Unclassified Bacteria	0.0159208	0	0	0	0.0131337	0	0	0	0.0126668	0	0	0	0	0	0	0	0.0167184	0	0	0	0.0163033	0	0	0	0	0.0170157	0	0	0.0195923	0.0297194	0.0138164	0.0184007	0.0217407	0	0	0	0	0.0144613	0	0	0	0	0	0	0	0
ASV1170	Archaea	Methanobacteriota	Unclassified Methanobacteriota	0	0.0601381	0	0	0	0	0	0	0	0	0	0.0300188	0	0	0.0225341	0	0	0.0260442	0	0	0	0	0	0	0	0	0	0.0230328	0	0	0	0	0	0	0	0	0.0324609	0	0	0	0	0	0	0	0	0
ASV1171	Bacteria	Bacteroidota	Flavobacteriia	0	0	0	0	0	0	0.0486338	0	0	0.0290948	0	0	0	0	0	0	0	0	0.0457457	0	0	0	0.0339048	0	0	0.0215532	0	0	0	0	0	0	0	0	0.0251826	0	0	0	0.0245851	0	0	0	0	0	0	0
ASV1172	Bacteria	Chloroflexota	Chloroflexia	0.019901	0	0	0	0.0240785	0	0.0234163	0	0	0	0	0	0	0	0	0	0.0191068	0	0	0	0	0	0	0	0	0.0192844	0	0	0.0068573	0	0	0.0195508	0	0	0	0	0	0.0159074	0	0	0	0.0409228	0	0	0	0
ASV1173	Bacteria	Acidobacteriota	Unclassified Acidobacteriota	0.0159208	0	0	0	0.0197006	0	0	0	0.0205836	0	0	0	0	0	0	0	0.0262718	0	0	0	0.00889271	0	0	0	0	0.00453751	0	0	0.0146942	0.0178317	0.0189976	0.0276011	0	0.0213598	0	0	0	0.00867679	0	0	0	0	0	0	0	0
ASV1174	Bacteria	Pseudomonadota	Alphaproteobacteria	0	0.0164895	0	0	0.00547238	0.0382936	0	0.00793116	0	0	0	0	0	0	0	0	0.0167184	0	0	0	0.0192675	0	0.0190714	0	0	0	0.0110231	0.0121225	0.0107758	0	0.00690822	0.00805033	0	0	0	0	0	0	0	0	0	0	0	0	0.00841583	0
ASV1175	Bacteria	Chloroflexota	Chloroflexia	0	0.0145495	0	0	0	0.0134028	0	0.0158623	0	0	0.0294313	0	0	0	0	0	0	0	0	0.0261967	0	0	0	0.033502	0	0	0.0299198	0	0	0	0	0	0	0	0	0.040691	0	0	0.0145276	0	0	0	0	0	0	0
ASV1176	Bacteria	Unclassified Bacteria	Unclassified Bacteria	0	0	0.0218741	0.0195742	0	0	0	0.0237935	0	0	0.0370265	0	0	0	0	0	0	0	0	0	0	0	0	0	0	0	0	0	0	0	0	0	0	0	0	0	0.0341693	0	0	0	0.0193414	0	0.0521724	0	0	0
ASV1177	Bacteria	Acidobacteriota	Unclassified Acidobacteriota	0	0	0.010937	0.0165628	0	0.0153175	0	0.0178451	0	0.0133351	0	0.00750469	0	0	0.0348254	0	0	0.00813882	0	0	0	0	0.0254286	0	0	0	0.00629892	0	0	0	0	0	0	0	0.00801264	0	0.00341693	0	0.0111751	0.0162206	0.0112825	0	0	0.0189989	0	0
ASV1178	Bacteria	Pseudomonadota	Gammaproteobacteria	0	0	0	0.0165628	0	0	0	0.0138795	0	0	0.00569638	0.00750469	0	0	0.0163884	0.0351401	0	0	0	0.0119076	0	0	0	0.0176326	0	0	0.0204715	0.014547	0	0	0	0	0	0	0.010302	0	0.0102508	0	0	0.0139034	0.0145061	0	0	0.0172718	0.0115718	0
ASV1179	Bacteria	Pseudomonadota	Unclassified Pseudomonadota	0	0.0126096	0.010937	0	0	0	0	0.00892255	0	0.0109105	0.00474699	0	0	0	0.018437	0	0	0	0	0	0	0.0192887	0.0169524	0	0	0	0.0220462	0	0	0	0	0	0	0	0.0171699	0	0.0153762	0	0.0100576	0.0139034	0.0193414	0	0.0202893	0	0	0
ASV1180	Bacteria	Planctomycetota	Unclassified Planctomycetota	0.00663368	0.00096997	0	0	0	0.047867	0.0450313	0	0	0	0.000949397	0.00750469	0	0	0.0081942	0	0	0	0	0.0381043	0	0.0650995	0	0	0	0	0	0.00363676	0	0	0	0	0	0	0.00572331	0	0.00341693	0	0	0.0162206	0	0	0	0.00345435	0.00525989	0.00241482
ASV1181	Bacteria	Planctomycetota	Unclassified Planctomycetota	0	0	0	0	0	0	0	0.0247849	0	0.0242457	0.0104434	0	0	0	0.0163884	0	0	0	0	0	0	0	0	0.0141061	0	0	0.00787364	0.0169715	0	0	0	0	0	0	0	0	0.0375863	0	0.0145276	0	0.022565	0	0	0	0	0
ASV1182	Bacteria	Chloroflexota	Chloroflexia	0	0	0	0	0.0186061	0	0	0	0.044334	0	0	0	0	0	0	0	0	0	0	0	0.0237139	0	0	0	0	0.00567189	0	0	0.00195923	0.0475511	0	0	0	0	0	0	0	0.0448301	0	0	0	0.0217402	0	0	0	0
ASV1183	Bacteria	Chloroflexota	Chloroflexia	0.00796041	0	0	0	0	0.0172321	0	0.0218107	0	0.00969826	0	0.0243902	0	0	0	0	0	0	0	0.0500119	0	0	0	0.0123428	0	0	0	0.0193961	0	0	0	0.00920037	0	0	0	0	0.0324609	0	0	0	0	0	0	0.0189989	0	0
ASV1184	Bacteria	Unclassified Bacteria	Unclassified Bacteria	0	0	0	0	0	0	0	0	0	0	0	0	0	0	0	0	0	0	0	0	0	0	0	0	0	0	0	0.0266696	0	0	0	0	0	0	0	0	0	0	0	0	0.0193414	0	0	0	0.0136757	0.0724445
ASV1185	Bacteria	Chloroflexota	Chloroflexia	0	0	0	0.0180685	0	0	0	0	0	0	0.0104434	0.0131332	0	0	0	0	0	0	0	0	0	0	0	0.0352653	0	0	0.0283451	0.014547	0	0	0	0	0	0	0	0	0	0	0	0	0.0128943	0	0	0	0.00841583	0.0217334
ASV1186	Bacteria	Chloroflexota	Dehalococcoidia	0	0	0	0.0301141	0	0	0	0.0208193	0	0	0.0189879	0.0262664	0	0	0	0.0263551	0	0	0	0	0	0	0	0.0158694	0	0	0	0	0	0	0	0	0	0	0.0091573	0	0.0187931	0	0	0	0.0467418	0	0	0	0	0
ASV1187	Bacteria	Chloroflexota	Chloroflexia	0	0	0	0	0	0	0	0	0	0	0	0	0	0	0	0.0790653	0	0	0	0	0	0	0	0	0	0	0.0724375	0.0606127	0	0	0	0	0	0	0	0	0	0	0	0	0.0386828	0	0	0	0	0
ASV1188	Bacteria	Chloroflexota	Chloroflexia	0.0145941	0.0145495	0	0	0	0	0	0.0148709	0	0.0133351	0.0161398	0	0	0	0	0	0	0.0146499	0	0	0	0	0	0	0	0	0	0	0	0	0	0	0	0	0.0194593	0	0	0	0.0156451	0.0324412	0	0.00767303	0	0.0155446	0	0
ASV1189	Bacteria	Actinomycetota	Acidimicrobiia	0	0	0.0273426	0.0165628	0	0	0	0.0188365	0	0	0	0	0	0	0.0225341	0	0	0	0.0598212	0	0	0	0	0.0246857	0	0	0	0	0	0	0	0	0	0	0	0	0.0273355	0	0	0.0486618	0.0145061	0	0	0	0	0
ASV1190	Bacteria	Pseudomonadota	Deltaproteobacteria	0.0238812	0.0126096	0	0	0.0175116	0	0	0	0	0.0242457	0	0	0.0697593	0	0	0	0	0	0	0	0	0	0	0	0	0	0	0	0.0166534	0	0	0.0161007	0	0.0197167	0	0	0	0.0231381	0	0	0	0	0	0	0	0
ASV1191	Bacteria	Planctomycetota	Planctomycetia	0.0238812	0	0	0	0	0.0229762	0	0	0.0158336	0.0230334	0	0	0	0	0	0	0	0	0	0	0	0	0	0	0.00823882	0.0102094	0	0	0	0	0	0.0138006	0.0289876	0.0131445	0	0	0	0	0.0167626	0	0	0.0204614	0	0	0	0
ASV1192	Bacteria	Chloroflexota	Chloroflexia	0.0132674	0.0145495	0.00546852	0	0.00985028	0.0153175	0.0108075	0	0.0237503	0.0181842	0	0	0	0	0	0	0	0.00813882	0	0.0214337	0	0	0	0	0	0.0102094	0	0	0	0	0	0	0	0	0.0160253	0	0	0.0130152	0.0100576	0	0	0	0	0	0	0
ASV1193	Bacteria	Pseudomonadota	Deltaproteobacteria	0	0	0	0.0120457	0	0	0	0	0	0	0	0	0	0	0	0	0	0	0	0	0	0	0	0	0	0	0	0	0	0	0	0	0	0	0	0	0	0	0	0	0	0	0	0	0	0.0676149
ASV1194	Bacteria	Chloroflexota	Chloroflexia	0	0	0	0	0	0	0.0126088	0	0	0.0181842	0.00854457	0	0	0	0	0	0	0.0292997	0	0	0	0.0506329	0.0339048	0	0	0	0	0	0	0	0	0	0.0579752	0	0	0	0	0	0.0100576	0	0	0.0230191	0	0	0	0
ASV1195	Bacteria	Bacteroidota	Unclassified Bacteroidota	0	0	0	0	0	0	0	0	0	0	0	0	0	0	0	0	0	0	0	0	0	0	0	0	0	0	0	0	0	0	0	0	0	0	0	0	0	0	0	0	0	0	0	0	0	0.1304
ASV1196	Bacteria	Chloroflexota	Chloroflexia	0	0.0465585	0	0	0	0	0	0	0	0.0387931	0	0	0	0	0	0	0	0	0	0.0714456	0	0	0	0	0	0	0	0	0	0.0515137	0	0	0	0	0	0	0	0	0	0	0	0	0	0	0	0
ASV1197	Bacteria	Pseudomonadota	Deltaproteobacteria	0	0.0145495	0	0	0	0.0191468	0	0	0.0126668	0	0.00759518	0	0	0	0	0	0	0.00813882	0	0	0	0.0192887	0	0	0	0.0170157	0	0	0	0	0	0.0161007	0	0	0.0125913	0	0	0.0274765	0.0257026	0	0	0	0	0	0	0
ASV1198	Bacteria	Pseudomonadota	Alphaproteobacteria	0	0	0.00410139	0	0	0	0.021615	0	0	0.0145474	0.00759518	0.0225141	0	0	0	0	0	0	0	0	0	0	0.0190714	0.00352653	0	0	0.0204715	0.0206083	0	0	0	0	0	0	0.00457865	0	0.00170847	0	0.0122926	0.0324412	0.00967071	0	0	0.0207261	0	0
ASV1199	Bacteria	Unclassified Bacteria	Unclassified Bacteria	0	0	0	0.0195742	0	0	0	0.0178451	0	0	0.00379759	0.0356473	0	0	0	0	0	0	0	0	0	0	0	0.00881632	0	0	0	0.0400044	0	0	0	0	0	0	0	0	0	0	0	0	0	0	0	0.00863588	0.0315593	0
ASV1200	Bacteria	Chloroflexota	Chloroflexia	0	0	0.0273426	0	0	0	0	0.0198279	0	0	0	0	0	0	0.0553109	0	0	0	0	0	0	0	0	0.033502	0	0	0.0204715	0	0	0	0	0	0	0	0	0	0.0205016	0	0	0	0.0128943	0	0	0.029362	0	0
ASV1201	Bacteria	Acidobacteriota	Unclassified Acidobacteriota	0	0.0174595	0	0	0	0.047867	0	0	0	0	0	0	0	0	0.0266312	0	0	0.0602272	0	0	0	0	0	0.0405551	0	0	0	0	0	0	0	0	0	0	0	0	0	0	0	0.0463446	0	0	0	0	0	0
ASV1202	Bacteria	Verrucomicrobiota	Verrucomicrobiia	0.0411288	0	0	0	0.0262674	0	0	0	0	0	0	0	0.145332	0	0	0	0	0	0	0	0	0	0	0	0.0109851	0.0124782	0	0	0	0	0	0.0195508	0	0	0	0	0	0.0274765	0	0	0	0	0	0	0	0
ASV1203	Bacteria	Chloroflexota	Chloroflexia	0	0	0	0.0225856	0	0.0191468	0	0.0218107	0	0	0	0.0262664	0	0	0	0	0	0	0	0.0190522	0	0	0	0	0	0	0	0.0121225	0	0	0	0	0	0	0	0	0.0239185	0	0	0	0.0274004	0	0	0.0276348	0.0094678	0
ASV1204	Bacteria	Pseudomonadota	Unclassified Pseudomonadota	0	0	0	0	0.0131337	0	0	0	0	0	0	0	0	0	0	0	0	0	0	0	0	0	0	0	0.0260896	0.0215532	0	0	0.0342865	0.0178317	0.0224517	0	0.0241563	0	0	0	0	0.0130152	0	0	0	0.0115095	0	0	0	0
ASV1205	Bacteria	Planctomycetota	Planctomycetia	0	0.0261892	0	0	0	0.0459524	0	0	0	0.0327316	0	0	0	0.0324612	0	0	0	0	0	0	0	0	0.0254286	0	0	0	0	0	0	0	0	0	0	0	0	0	0	0	0.0379952	0	0	0	0	0	0	0
ASV1206	Bacteria	Bacteroidota	Unclassified Bacteroidota	0	0.00290991	0.0191398	0	0.0043779	0	0	0.0267677	0	0.00484913	0.0104434	0	0	0	0.0102428	0	0	0	0	0.00952608	0	0	0	0	0	0	0.00787364	0	0.00881653	0	0	0	0	0	0.0114466	0	0.0170847	0	0.0111751	0.0208551	0	0	0.0144923	0.0069087	0	0
ASV1207	Bacteria	Pseudomonadota	Deltaproteobacteria	0	0	0	0	0	0	0	0.0247849	0	0	0	0.0356473	0	0	0	0	0	0	0	0	0	0	0	0	0	0	0.0204715	0.0339431	0	0	0	0	0	0	0	0	0	0	0	0	0	0	0	0	0.0305074	0
ASV1208	Bacteria	Pseudomonadota	Deltaproteobacteria	0	0	0	0	0	0	0	0	0	0	0	0	0	0	0	0	0	0	0	0	0.198604	0	0	0	0	0	0	0	0	0	0	0	0	0	0	0	0	0	0	0	0	0	0	0	0	0
ASV1209	Bacteria	Acidobacteriota	Unclassified Acidobacteriota	0	0	0	0.0210799	0	0	0	0.0109053	0	0	0	0	0	0	0	0	0	0	0	0	0	0	0	0.0211592	0	0	0.0409429	0.0193961	0	0	0	0	0	0	0	0	0.0410032	0	0	0.0278067	0	0	0	0.0328163	0	0
ASV1210	Bacteria	Pseudomonadota	Deltaproteobacteria	0.0225545	0.0203694	0	0	0	0	0	0.0168537	0	0.0290948	0	0	0	0	0	0	0	0	0	0	0	0	0	0	0.0123582	0.0147469	0	0	0	0	0	0	0	0	0.0137359	0	0	0	0.0223501	0	0	0	0	0	0	0
ASV1211	Bacteria	Unclassified Bacteria	Unclassified Bacteria	0	0.00387988	0	0.0105399	0	0	0	0.00991395	0	0.00606141	0.0132916	0.0131332	0	0	0.0327768	0	0	0	0	0	0.00889271	0	0	0.0123428	0	0	0.00787364	0.0157593	0	0	0	0	0	0	0.00801264	0	0	0	0	0	0.00805893	0	0.0144923	0.0103631	0.00631187	0
ASV1212	Bacteria	Acidobacteriota	Unclassified Acidobacteriota	0	0	0	0	0.0295508	0	0	0	0	0	0	0	0	0	0	0	0	0	0	0	0.0326066	0	0	0	0.0247164	0.0158813	0	0	0	0.0435885	0.0328141	0	0	0.0180737	0	0	0	0	0	0	0	0	0	0	0	0
ASV1213	Bacteria	Chloroflexota	Chloroflexia	0	0	0	0	0	0	0	0	0	0	0	0	0	0	0	0	0	0	0	0	0	0	0	0	0	0	0	0	0.0548584	0	0.0690822	0	0	0	0	0	0	0	0.0413477	0	0	0	0	0	0	0
ASV1214	Bacteria	Pseudomonadota	Gammaproteobacteria	0	0.0174595	0.0150384	0	0	0.00957341	0.0198138	0	0	0	0.00569638	0	0	0	0	0	0	0.0130221	0.0211134	0	0	0.0433996	0.0466191	0	0	0	0.00944837	0	0	0	0	0	0	0	0.00801264	0	0	0	0.0167626	0	0	0	0	0	0	0
ASV1215	Archaea	Methanobacteriota	Unclassified Methanobacteriota	0.025208	0	0.0205069	0	0.00766133	0	0	0	0	0	0	0	0	0	0	0	0	0	0	0	0.0163033	0	0	0	0	0.0226876	0	0	0	0	0	0.024151	0	0.0147876	0	0	0	0.0231381	0	0	0	0.0179037	0	0	0	0
ASV1216	Bacteria	Unclassified Bacteria	Unclassified Bacteria	0	0	0.0273426	0	0	0	0	0	0	0.0193965	0.014241	0	0	0	0	0	0	0.0211609	0	0.0285782	0	0	0	0	0	0.0113438	0	0	0	0	0	0	0	0	0.0183146	0	0	0	0.0122926	0	0	0.0140672	0	0.0138174	0	0
ASV1217	Bacteria	Pseudomonadota	Unclassified Pseudomonadota	0	0	0.0136713	0.00752853	0	0	0	0.0198279	0	0	0.0161398	0	0	0	0	0	0	0	0	0	0	0	0	0	0	0	0.017322	0.0230328	0	0	0	0	0	0	0	0.0184959	0.0222101	0	0	0	0.0128943	0	0	0.0155446	0.0094678	0
ASV1218	Bacteria	Planctomycetota	Unclassified Planctomycetota	0	0	0	0.0195742	0	0	0	0.0158623	0	0	0	0.0225141	0	0	0	0	0	0	0	0	0	0	0	0.0282122	0	0	0	0.0218206	0	0	0	0	0	0	0	0	0.0358778	0	0	0	0	0	0	0	0.0294554	0.0193185
ASV1219	Bacteria	Pseudomonadota	Alphaproteobacteria	0	0	0	0.0165628	0	0	0	0	0	0.0206088	0.0161398	0.0187617	0	0	0.0163884	0	0	0	0	0.0309598	0	0	0	0	0	0	0	0	0	0	0	0	0	0	0.00801264	0	0	0	0	0.0393929	0	0.0102307	0	0.0241805	0.0105198	0
ASV1220	Bacteria	Pseudomonadota	Alphaproteobacteria	0	0	0	0	0	0	0	0	0	0	0.00189879	0.0281426	0	0.081153	0	0.0966353	0	0.00325553	0	0	0	0.00482218	0	0	0	0	0.0409429	0	0	0	0	0	0	0	0.00343399	0	0	0	0	0	0.0354593	0	0.0376801	0	0	0
ASV1221	Bacteria	Unclassified Bacteria	Unclassified Bacteria	0	0	0	0.0135514	0	0	0	0.0158623	0	0	0.0208867	0.0187617	0	0	0.0266312	0	0	0	0	0	0	0	0	0	0	0	0	0	0	0	0	0	0	0	0.010302	0	0.0187931	0	0	0.0185378	0	0	0	0	0.0168317	0
ASV1222	Bacteria	Pseudomonadota	Deltaproteobacteria	0	0	0.0218741	0.0165628	0	0	0	0.0228021	0	0	0.00854457	0.0131332	0	0	0	0	0	0	0	0.0214337	0	0	0	0	0	0	0.0141726	0.0133348	0	0	0	0	0	0	0	0.0332926	0.0136677	0	0	0.0139034	0	0	0	0.0224533	0	0
ASV1223	Archaea	Methanobacteriota	Unclassified Methanobacteriota	0.00796041	0.0135796	0	0	0.0109448	0.0191468	0.0108075	0	0	0.0181842	0	0	0	0	0	0	0.00955338	0	0	0.0119076	0	0	0.0127143	0	0	0	0	0	0	0.0158504	0	0	0	0.0131445	0.0137359	0	0	0.0130152	0	0	0.0112825	0.00511535	0	0.0103631	0	0
ASV1224	Bacteria	Pseudomonadota	Alphaproteobacteria	0	0.0116396	0	0	0	0	0.0198138	0	0	0	0	0	0	0	0	0	0	0	0.0281512	0	0	0.0313442	0	0	0	0	0	0.0363676	0	0	0	0	0	0	0	0	0	0	0	0	0.0209532	0	0	0	0.0326113	0.0289778
ASV1225	Bacteria	Chloroflexota	Chloroflexia	0	0	0.0287097	0	0	0	0	0.0366816	0	0	0	0	0	0	0.0204855	0	0	0	0	0.0476304	0	0	0	0	0	0	0	0	0	0	0	0	0	0	0	0	0.0717556	0	0	0	0	0	0	0	0	0
ASV1226	Bacteria	Chloroflexota	Dehalococcoidia	0	0	0	0	0	0	0	0.0198279	0	0	0	0	0	0	0	0	0	0	0	0	0	0	0	0	0	0	0	0.0448534	0	0	0	0	0	0	0	0	0	0	0	0	0.0338475	0	0	0	0.0315593	0
ASV1227	Bacteria	Verrucomicrobiota	Unclassified Verrucomicrobiota	0	0	0	0	0	0	0	0	0	0	0	0	0.0465062	0	0	0	0.0262718	0	0	0	0	0	0	0	0	0.0317626	0	0	0.0293884	0.0217943	0.0379952	0	0	0.0328612	0	0	0	0	0	0	0	0	0	0	0	0
ASV1228	Bacteria	Verrucomicrobiota	Unclassified Verrucomicrobiota	0	0.0116396	0	0	0.0186061	0.0344643	0	0	0	0	0	0	0	0	0	0	0	0	0	0	0	0.0192887	0	0	0	0.0226876	0	0	0	0	0	0	0.0241563	0	0.0240379	0	0	0.0144613	0	0	0	0.0166249	0	0	0	0
ASV1229	Bacteria	Pseudomonadota	Deltaproteobacteria	0	0.00872973	0	0	0	0.0172321	0.0252175	0	0	0.0363685	0	0	0	0	0	0	0	0.0113943	0	0	0	0	0.0148333	0	0	0	0	0	0	0	0	0	0	0	0.0286166	0	0	0	0.0156451	0	0	0.00767303	0.0231877	0	0	0
ASV1230	Bacteria	Pseudomonadota	Oligoflexia	0	0	0	0	0	0	0	0	0	0	0	0	0	0	0	0	0	0	0	0	0	0	0	0	0	0	0	0	0	0	0	0	0	0	0	0	0	0	0	0	0	0	0	0	0.0431311	0.0965927
ASV1231	Bacteria	Unclassified Bacteria	Unclassified Bacteria	0	0	0	0	0	0	0	0	0	0	0	0	0	0	0	0	0	0	0	0	0	0	0	0	0	0	0	0	0	0	0	0	0	0	0	0	0	0	0	0	0	0	0	0	0.0210396	0.0603704
ASV1232	Bacteria	Chloroflexota	Chloroflexia	0.0119406	0	0	0	0.0186061	0	0	0	0	0	0	0	0	0	0	0	0.0214951	0.00976658	0	0	0.0163033	0	0	0	0	0.00680627	0	0	0.0146942	0.019813	0.0259058	0	0	0	0.0183146	0	0	0.0202458	0	0	0	0	0	0	0	0
ASV1233	Bacteria	Candidatus Eremiobacterota	Unclassified candidatus Eremiobacterota	0	0	0	0.0828139	0	0	0	0	0	0	0	0	0	0.0779069	0	0	0	0	0	0	0	0	0	0	0	0	0	0.00484901	0	0	0	0	0	0	0	0	0	0	0	0.0347584	0	0	0	0.0518153	0	0
ASV1234	Bacteria	Unclassified Bacteria	Unclassified Bacteria	0	0	0	0.0195742	0	0	0.021615	0.0118967	0	0	0.00949397	0	0	0	0.0225341	0	0	0	0	0	0	0	0	0	0	0	0	0	0	0	0	0	0	0	0	0	0.0324609	0	0.00894005	0.0115861	0.0145061	0	0	0.0120902	0.0231435	0
ASV1235	Bacteria	Pseudomonadota	Alphaproteobacteria	0	0	0	0	0.00985028	0.0402083	0	0	0	0	0	0	0	0	0	0	0.0214951	0	0.035189	0	0	0	0	0	0.0151045	0.0102094	0	0	0	0	0	0	0	0	0	0	0.0290439	0	0.0279376	0	0.0274004	0	0	0	0	0
ASV1236	Bacteria	Planctomycetota	Unclassified Planctomycetota	0	0	0	0	0	0	0	0	0.0316671	0	0	0	0	0	0	0	0.00716503	0	0	0	0.0355708	0	0	0	0	0.0249563	0	0	0.0186127	0	0	0	0	0.0131445	0	0	0	0.0260304	0	0	0	0.0179037	0	0	0	0
ASV1237	Bacteria	Unclassified Bacteria	Unclassified Bacteria	0	0	0	0	0	0	0	0	0	0	0	0.0694184	0	0	0	0	0	0	0	0	0	0	0	0	0	0	0	0.0630372	0	0	0	0	0	0	0	0	0	0	0	0	0	0	0	0	0.0199876	0
ASV1238	Bacteria	Planctomycetota	Planctomycetia	0.0398021	0.0126096	0.0177727	0	0	0	0	0	0	0	0.00854457	0	0	0	0	0	0	0	0	0.0214337	0	0	0	0	0	0	0	0	0	0	0	0.0310513	0.0338189	0	0	0.0184959	0	0	0	0	0.0112825	0	0	0	0	0
ASV1239	Bacteria	Unclassified Bacteria	Unclassified Bacteria	0.0119406	0	0.0136713	0.0105399	0	0	0.00900625	0.00693976	0.00475007	0.0121228	0.0199373	0	0	0	0	0	0	0	0	0.0190522	0	0	0.0190714	0	0	0	0.00944837	0.0157593	0	0	0	0	0	0.0115014	0.0091573	0	0.00683387	0	0	0	0	0	0	0	0	0
ASV1240	Bacteria	Pseudomonadota	Gammaproteobacteria	0	0	0	0.00752853	0	0	0	0	0	0	0	0.0300188	0	0	0	0	0	0	0	0	0	0	0	0	0	0	0	0.0206083	0	0	0	0	0	0	0	0	0	0	0	0	0	0	0	0	0.00841583	0.0289778
ASV1241	Bacteria	Chloroflexota	Dehalococcoidia	0	0	0	0	0	0	0	0.0257763	0	0	0	0	0	0	0	0	0	0	0	0	0	0	0	0	0	0	0	0.0363676	0	0	0	0	0	0	0	0	0	0	0	0	0	0	0	0	0.0378712	0.0362223
ASV1242	Bacteria	Chloroflexota	Chloroflexia	0	0	0	0	0	0	0	0	0.0285004	0	0	0	0	0	0	0	0.0310485	0	0	0	0.0326066	0	0	0	0	0.0158813	0	0	0.0205719	0	0.00690822	0.0115005	0	0	0	0	0	0.0260304	0.00782254	0	0	0	0	0	0	0
ASV1243	Bacteria	Acidobacteriota	Unclassified Acidobacteriota	0	0	0	0	0	0	0	0	0	0	0	0	0	0	0	0	0.0525436	0	0	0	0	0	0	0	0	0.0363001	0	0	0.0274292	0	0	0	0.0579752	0	0	0	0	0.0303688	0	0	0	0	0	0	0	0
ASV1244	Bacteria	Chloroflexota	Dehalococcoidia	0.0185743	0.0193994	0	0	0.0153227	0	0.02882	0	0	0.0109105	0	0	0	0	0	0	0	0	0	0	0	0	0	0	0	0.0226876	0	0	0	0	0	0.0195508	0	0	0	0	0	0	0.0178801	0	0	0	0	0	0	0
ASV1245	Bacteria	Unclassified Bacteria	Unclassified Bacteria	0.0172476	0	0	0	0.0153227	0	0	0	0.0332505	0	0	0	0	0	0	0	0	0	0	0	0.0222318	0	0	0	0	0.00907503	0	0	0	0	0.0224517	0	0	0.0213598	0	0	0	0.0231381	0	0	0	0.0166249	0	0	0	0
ASV1246	Archaea	Unclassified Archaea	Unclassified Archaea	0	0	0.0123042	0	0.0262674	0	0	0	0	0.0303071	0	0	0	0	0	0.0175701	0	0	0	0	0	0	0.0275476	0	0	0	0	0	0.0137146	0.0158504	0	0.0126505	0.0217407	0	0	0	0	0	0.0100576	0	0	0	0	0	0	0
ASV1247	Bacteria	Pseudomonadota	Gammaproteobacteria	0.00796041	0.0543183	0	0	0	0	0	0	0	0	0.00474699	0	0	0	0	0	0	0	0	0	0	0	0	0	0.081015	0	0	0	0	0	0	0	0	0	0	0	0	0	0	0	0	0	0	0	0	0
ASV1248	Bacteria	Acidobacteriota	Unclassified Acidobacteriota	0.00265347	0.0271592	0	0	0.0131337	0	0	0	0	0	0	0	0	0.0227228	0	0	0	0	0.0950102	0	0	0	0	0	0	0	0	0	0	0	0	0	0	0	0	0	0	0	0	0	0	0.0294133	0.0782586	0	0	0
ASV1249	Bacteria	Chloroflexota	Chloroflexia	0	0	0	0	0	0	0	0.0128881	0	0	0.0189879	0.0206379	0	0	0	0	0	0	0	0	0	0	0	0.0370285	0	0	0	0.0109103	0	0	0	0	0	0	0	0	0.0307524	0	0	0	0	0	0	0	0.0357673	0
ASV1250	Bacteria	Pseudomonadota	Gammaproteobacteria	0	0.0145495	0	0.0451712	0	0	0	0.0346988	0	0	0	0	0	0	0	0	0	0	0	0	0	0	0	0.0193959	0	0	0	0	0	0	0	0	0	0	0	0	0.0222101	0	0.0100576	0	0.0209532	0	0	0	0	0
ASV1251	Bacteria	Chloroflexota	Chloroflexia	0.019901	0	0	0	0.0142282	0	0	0	0	0	0	0	0	0	0	0	0	0	0	0	0	0	0	0	0	0.0249563	0	0	0.0205719	0.0178317	0.02936	0.0172507	0	0	0	0	0	0.0187997	0	0	0	0	0	0	0	0
ASV1252	Bacteria	Acidobacteriota	Unclassified Acidobacteriota	0	0.0271592	0.0259754	0	0.0240785	0.0229762	0	0	0	0.0157597	0	0	0	0	0	0	0	0	0	0	0	0.0241109	0.0445	0	0	0	0	0	0	0	0	0	0	0	0	0	0	0	0	0	0	0	0	0	0	0
ASV1253	Bacteria	Acidobacteriota	Terriglobia	0	0.0135796	0	0	0	0.0191468	0.0234163	0	0	0.0230334	0	0	0	0	0.0266312	0	0	0	0.0281512	0	0	0	0.0127143	0	0	0	0	0	0	0	0	0	0	0	0.0125913	0	0	0	0.0234676	0	0	0	0.0289847	0	0	0
ASV1254	Bacteria	Pseudomonadota	Unclassified Pseudomonadota	0	0.00581982	0	0	0	0	0	0	0	0	0.00854457	0.0187617	0	0	0	0	0	0	0	0	0	0	0	0	0	0	0	0.00727352	0	0	0	0	0	0	0.00801264	0	0.0170847	0	0	0.00695169	0	0	0	0	0.00525989	0.0289778
ASV1255	Bacteria	Unclassified Bacteria	Unclassified Bacteria	0	0.00581982	0.00683564	0	0	0.0134028	0.0162113	0	0	0.0242457	0.0199373	0	0	0.0227228	0.0122913	0	0	0.0146499	0	0.0238152	0	0	0.00847619	0	0	0	0.0157473	0	0	0	0	0	0	0	0	0	0	0	0.00558753	0	0.00967071	0	0	0	0	0
ASV1256	Bacteria	Candidatus Microgenomatota	Unclassified candidatus Microgenomatota	0	0	0.010937	0	0.0131337	0	0	0	0	0	0.00854457	0	0	0	0	0	0	0.0162776	0	0	0	0	0	0.0211592	0	0	0	0.00969803	0	0	0	0	0	0.00657225	0.00572331	0	0.0051254	0	0	0	0.00805893	0.00511535	0	0.00863588	0.0189356	0.0169037
ASV1257	Bacteria	Planctomycetota	Unclassified Planctomycetota	0.0212278	0	0	0	0	0	0	0	0.022167	0	0	0	0	0	0	0	0.0167184	0	0	0	0.0133391	0	0	0	0.0151045	0.00794065	0	0	0.0186127	0	0	0.0103504	0.0193251	0.0115014	0	0	0	0.0115691	0	0	0	0.0127884	0	0	0	0
ASV1258	Bacteria	Unclassified Bacteria	Unclassified Bacteria	0	0	0	0.0120457	0	0	0	0.0148709	0	0	0.014241	0.0168856	0	0	0	0	0	0	0	0.0119076	0	0	0	0	0	0	0	0.0315186	0	0	0	0	0	0	0	0	0	0	0	0	0	0	0	0.00863588	0.0136757	0
ASV1259	Bacteria	Acidobacteriota	Unclassified Acidobacteriota	0.00663368	0.0106697	0	0	0.00985028	0.00574405	0.0252175	0	0.00633342	0.0254579	0	0	0	0	0	0	0	0.0113943	0.0175945	0	0	0	0	0	0.0123582	0	0	0	0	0	0	0	0	0	0.00457865	0	0	0.00723066	0.00782254	0	0	0.0255768	0	0	0	0
ASV1260	Bacteria	Pseudomonadota	Alphaproteobacteria	0	0.00678979	0	0	0.0109448	0	0	0	0.0205836	0	0	0	0	0	0	0	0	0	0	0	0.0177854	0	0	0	0	0.00907503	0	0	0.0166534	0	0.0155435	0.0172507	0.026572	0	0	0	0	0.0115691	0	0	0	0.00895186	0.0202893	0	0	0
ASV1261	Bacteria	Planctomycetota	Planctomycetia	0	0	0.0341782	0.0240913	0	0.0191468	0	0.0218107	0	0	0	0	0	0.0194767	0.018437	0.0351401	0	0	0	0	0	0	0	0	0	0	0.0204715	0	0	0	0	0	0	0	0	0	0.0153762	0	0	0	0.00967071	0	0	0	0	0
ASV1262	Bacteria	Pseudomonadota	Gammaproteobacteria	0	0	0	0.0316198	0	0	0	0.0178451	0	0	0	0	0	0.00324612	0	0	0	0.0211609	0	0	0	0	0	0	0	0	0	0.00848577	0	0.0376446	0	0	0	0	0	0	0	0	0	0.0324412	0	0	0	0.0535424	0	0
ASV1263	Bacteria	Unclassified Bacteria	Unclassified Bacteria	0	0	0	0.0135514	0	0	0.00900625	0.0109053	0	0.00484913	0.0113928	0	0	0	0.0163884	0.0131775	0	0	0	0.0119076	0	0.0120555	0.0169524	0.0193959	0	0	0.0110231	0	0	0	0	0	0	0	0.00228932	0	0.0136677	0	0.00670503	0	0.0177296	0	0	0.0155446	0	0
ASV1264	Bacteria	Pseudomonadota	Alphaproteobacteria	0	0	0	0	0	0	0	0.0148709	0	0	0.0227855	0.0225141	0	0	0	0	0	0	0	0	0	0	0	0	0	0	0	0.0230328	0	0	0	0	0	0	0	0	0.0239185	0	0	0.0347584	0.0241768	0	0	0	0.0105198	0
ASV1265	Bacteria	Pseudomonadota	Deltaproteobacteria	0	0.00775976	0	0	0	0	0.02882	0	0	0	0.0132916	0.0262664	0	0	0.0225341	0.0263551	0	0.0179054	0	0	0	0	0	0	0	0	0	0	0	0	0	0	0	0	0.0217486	0	0	0	0.0156451	0.0254895	0	0	0	0	0	0
ASV1266	Bacteria	Chloroflexota	Chloroflexia	0	0.0135796	0	0	0	0	0	0	0.0110835	0.0145474	0	0	0	0	0	0	0	0	0	0	0.0296424	0	0	0	0	0.0102094	0	0	0	0	0	0	0	0	0	0	0.0153762	0.0101229	0.0279376	0	0	0.00895186	0	0.0224533	0	0
ASV1267	Bacteria	Acidobacteriota	Unclassified Acidobacteriota	0	0.00775976	0	0	0	0	0.0198138	0	0.0158336	0	0	0	0	0	0	0	0	0.0325553	0	0	0.0177854	0	0	0	0.0274627	0	0	0	0	0	0	0.0184007	0	0	0	0	0	0	0	0	0	0.0242979	0.0202893	0	0	0
ASV1268	Bacteria	Acidobacteriota	Unclassified Acidobacteriota	0	0	0	0	0.0164171	0	0	0	0.026917	0	0	0	0	0	0	0	0	0	0	0	0	0	0	0	0	0.032897	0	0	0.043103	0	0.031087	0	0	0	0	0	0	0	0	0	0	0	0	0	0	0
ASV1269	Bacteria	Pseudomonadota	Unclassified Pseudomonadota	0.0132674	0.0174595	0	0.00602283	0.00985028	0	0	0	0	0.00848598	0	0	0	0	0	0	0	0	0	0	0.0163033	0	0	0	0	0.0102094	0	0	0	0.019813	0.0259058	0.00575023	0	0	0	0	0	0.021692	0	0	0	0	0	0	0.0094678	0
ASV1270	Bacteria	Unclassified Bacteria	Unclassified Bacteria	0.0119406	0.0155195	0	0	0	0	0	0	0	0.0109105	0	0	0	0	0	0	0.0167184	0.0130221	0	0	0.0103748	0	0	0.0193959	0.00961195	0.0113438	0	0	0	0.0178317	0.0172706	0.00575023	0	0	0	0	0	0	0	0	0	0.0179037	0	0	0	0
ASV1271	Bacteria	Pseudomonadota	Gammaproteobacteria	0.00928715	0.0106697	0	0	0	0	0.01441	0	0.00475007	0	0.00664578	0	0	0	0.0122913	0	0	0.00813882	0	0	0	0	0	0	0.00686568	0.00794065	0	0	0	0.00792519	0.0120894	0.0184007	0	0.0180737	0.00686797	0	0	0	0.00558753	0	0	0.00895186	0.0202893	0	0	0
ASV1272	Bacteria	Pseudomonadota	Deltaproteobacteria	0	0.0252192	0	0	0	0.0134028	0.01441	0	0.0126668	0.0072737	0	0	0	0.0292151	0	0	0	0.0260442	0	0	0	0	0	0	0	0	0.0236209	0	0	0	0	0	0	0	0.00801264	0	0	0	0.0145276	0.0162206	0	0	0	0	0	0
ASV1273	Bacteria	Verrucomicrobiota	Verrucomicrobiia	0	0	0	0	0.022984	0	0	0	0	0	0.0151904	0	0	0	0	0	0	0	0	0	0	0	0	0	0.0288359	0	0	0	0.0195923	0	0	0	0	0.0230029	0.0343399	0	0	0	0	0	0	0	0	0	0	0
ASV1274	Bacteria	Spirochaetota	Spirochaetia	0	0	0	0	0	0	0.0270188	0.0118967	0	0	0.0208867	0.0318949	0	0	0	0	0	0	0	0	0	0	0	0	0	0	0.0314946	0.00848577	0.0117554	0	0	0	0	0	0.0194593	0	0	0	0	0	0	0	0	0	0	0
ASV1275	Bacteria	Planctomycetota	Unclassified Planctomycetota	0	0	0	0	0	0	0	0	0	0	0	0	0	0	0	0	0	0	0	0	0	0	0	0	0	0	0	0	0	0	0	0	0	0	0	0	0	0	0	0	0	0	0	0	0.0578588	0.0845186
ASV1276	Bacteria	Bacteroidota	Flavobacteriia	0	0	0	0	0	0	0	0	0	0	0	0	0	0	0	0	0	0	0	0	0	0	0	0	0	0	0	0	0	0	0	0	0	0	0	0	0	0	0	0	0	0	0	0	0.00631187	0.0724445
ASV1277	Bacteria	Unclassified Bacteria	Unclassified Bacteria	0	0	0	0	0	0	0	0	0	0	0	0	0	0	0	0	0	0	0	0	0	0	0	0	0	0	0	0.0303063	0	0	0	0	0	0	0	0	0	0	0	0	0	0	0	0.0500881	0.0315593	0.0217334
ASV1278	Bacteria	Acidobacteriota	Unclassified Acidobacteriota	0	0	0	0	0	0	0	0	0	0	0	0	0	0	0	0	0	0	0	0	0.0281602	0	0	0	0	0	0	0.0290941	0	0	0	0	0	0	0.0331952	0	0	0	0	0.0463446	0	0	0	0.0276348	0.0147277	0
ASV1279	Bacteria	Pseudomonadota	Gammaproteobacteria	0	0.101847	0	0	0	0	0	0	0	0	0	0	0	0	0	0	0	0	0	0	0	0	0	0	0.0219702	0	0	0	0	0	0	0	0	0	0	0	0	0	0	0	0	0	0	0	0	0
ASV1280	Bacteria	Chloroflexota	Chloroflexia	0	0	0.0095699	0	0.00766133	0.0191468	0.0126088	0	0	0.0109105	0.0218361	0	0	0	0.00614565	0	0	0.0113943	0	0	0	0	0.0169524	0.0211592	0	0	0.00629892	0	0	0	0	0	0	0	0	0	0.0051254	0	0	0.0254895	0	0	0.0144923	0.00863588	0	0
ASV1281	Bacteria	Planctomycetota	Unclassified Planctomycetota	0	0	0	0	0	0	0	0.0218107	0	0	0.00854457	0.0243902	0	0	0.0204855	0	0	0	0	0.0238152	0	0	0	0	0	0	0.0220462	0	0	0	0	0	0	0	0	0	0.0427117	0	0	0	0.00805893	0	0	0.0224533	0	0
ASV1282	Bacteria	Unclassified Bacteria	Unclassified Bacteria	0	0	0	0	0	0	0	0	0.0285004	0.0315194	0	0	0	0	0	0	0	0	0	0	0	0	0	0	0	0	0	0	0	0	0	0.0379515	0	0.027932	0	0	0	0	0	0	0	0.0345286	0	0	0	0
ASV1283	Bacteria	Planctomycetota	Unclassified Planctomycetota	0	0	0	0.0572169	0	0	0	0.0396558	0	0	0	0	0	0	0	0.0439252	0	0	0	0	0	0	0	0	0	0	0.0125978	0	0	0	0	0	0	0	0	0	0	0	0	0	0.0402946	0	0	0	0	0
ASV1284	Bacteria	Planctomycetota	Phycisphaerae	0	0	0	0	0	0	0	0	0	0	0	0	0	0	0	0	0.0549319	0	0	0	0.0355708	0	0	0	0	0	0	0	0.0538788	0.0376446	0	0	0	0	0	0	0	0	0	0	0	0	0	0	0	0
ASV1285	Bacteria	Chloroflexota	Dehalococcoidia	0.00796041	0	0.0177727	0	0.0142282	0	0	0.00892255	0	0	0.014241	0	0	0	0	0	0	0	0	0	0	0	0	0	0	0	0.0141726	0	0	0	0	0	0	0	0.0228932	0.0517886	0.0153762	0	0	0	0.0112825	0	0	0.00863588	0	0
ASV1286	Bacteria	Chloroflexota	Chloroflexia	0	0.0135796	0	0	0.00547238	0	0.0108075	0	0.00791678	0.0121228	0.00569638	0	0	0.0194767	0	0	0	0.0227887	0	0.0119076	0	0	0.0148333	0	0	0	0.0110231	0	0	0	0	0	0	0	0.0091573	0	0	0	0.0111751	0.0115861	0	0	0.0202893	0.00863588	0	0
ASV1287	Bacteria	Pseudomonadota	Alphaproteobacteria	0	0	0	0.0647454	0	0	0	0.0495697	0	0	0	0	0	0	0	0	0	0	0	0	0	0	0	0	0	0	0	0.0327308	0	0	0	0	0	0	0	0	0	0	0	0	0	0	0	0	0	0
ASV1288	Bacteria	Chloroflexota	Chloroflexia	0	0	0	0	0.0120392	0	0	0	0	0	0	0	0	0	0	0	0	0	0	0	0	0	0	0	0	0.0226876	0	0	0.0342865	0.0237756	0.02936	0	0.0314032	0	0	0	0	0.0173536	0	0	0	0	0	0	0	0
ASV1289	Bacteria	Pseudomonadota	Deltaproteobacteria	0	0	0	0	0	0	0	0	0	0	0.113928	0	0	0	0	0	0	0	0	0	0	0	0	0	0	0	0	0	0	0	0	0	0	0	0	0	0	0	0	0	0	0	0	0	0	0
ASV1290	Bacteria	Unclassified Bacteria	Unclassified Bacteria	0	0	0	0	0	0	0	0	0	0	0	0	0	0	0	0	0.0525436	0	0	0	0.0489099	0	0	0	0	0	0	0	0	0	0	0.0287512	0.0410658	0.0377904	0	0	0	0	0	0	0	0	0	0	0	0
ASV1291	Bacteria	Bacteroidota	Unclassified Bacteroidota	0	0	0	0	0	0	0	0	0	0	0	0	0	0	0	0	0	0	0	0	0	0	0	0	0	0	0	0	0	0	0	0	0	0	0	0	0	0	0	0	0	0	0	0	0	0.0338074
ASV1292	Bacteria	Pseudomonadota	Deltaproteobacteria	0.00530694	0.0232793	0	0	0	0.0153175	0.0180125	0	0	0.0145474	0.00569638	0	0	0	0	0	0	0	0.035189	0	0	0.0216998	0.0127143	0	0	0	0	0	0	0	0	0	0	0	0.0091573	0	0.0170847	0	0.0145276	0	0	0	0	0	0	0
ASV1293	Bacteria	Pseudomonadota	Alphaproteobacteria	0	0	0.0205069	0.00301141	0	0.0210615	0	0.00198279	0	0	0.0113928	0	0	0	0	0	0	0	0	0.152417	0	0	0	0	0	0	0.00157473	0	0	0	0	0	0	0	0.00114466	0	0	0	0.00111751	0.0139034	0.00805893	0	0	0	0	0
ASV1294	Bacteria	Acidobacteriota	Unclassified Acidobacteriota	0	0	0	0	0	0	0	0.0832772	0	0	0	0	0	0	0	0	0	0	0	0	0	0	0	0	0	0	0.0141726	0	0	0	0	0	0	0	0	0	0	0	0	0	0	0	0	0	0.0284034	0
ASV1295	Bacteria	Candidatus Binatota	Candidatus Binatia	0.0371486	0.0349189	0	0	0	0	0	0	0	0.0327316	0	0	0	0	0	0	0	0	0	0	0	0	0	0	0	0	0	0	0	0	0	0	0	0	0.0320505	0	0	0	0	0	0	0	0	0	0	0
ASV1296	Bacteria	Chloroflexota	Chloroflexia	0.0145941	0.0145495	0	0	0	0	0	0.00198279	0	0	0	0	0	0.0584302	0	0	0	0.027672	0	0	0	0.0433996	0	0	0	0	0	0	0	0	0	0	0	0	0	0	0.00170847	0	0.0312902	0	0	0	0	0	0.0094678	0
ASV1297	Bacteria	Pseudomonadota	Gammaproteobacteria	0	0.0106697	0.0123042	0.0120457	0	0	0.0126088	0	0.00950013	0.0109105	0.014241	0.011257	0	0	0	0	0	0	0	0	0.0118569	0	0	0	0	0	0.0125978	0	0	0	0	0	0	0	0.00686797	0	0.0102508	0	0.00894005	0	0	0.00639419	0	0.0120902	0	0
ASV1298	Bacteria	Acidobacteriota	Unclassified Acidobacteriota	0	0	0	0	0	0	0	0	0	0	0	0.0525328	0	0	0	0	0	0	0	0	0	0	0	0	0	0	0	0.0630372	0	0	0	0	0	0	0	0	0	0	0	0	0	0	0	0	0.0231435	0
ASV1299	Bacteria	Chloroflexota	Chloroflexia	0	0	0	0	0	0	0	0	0	0	0	0	0	0	0	0	0	0	0	0	0	0	0	0	0	0	0	0.0424289	0	0	0	0	0	0	0	0	0	0	0	0	0	0	0	0	0.0315593	0.0289778
ASV1300	Bacteria	Pseudomonadota	Gammaproteobacteria	0.0344951	0	0	0	0.0919359	0	0	0	0	0	0	0	0	0	0	0	0	0	0	0	0	0	0	0	0	0	0	0	0.00881653	0	0	0	0	0	0	0	0	0	0	0	0	0	0	0	0	0
ASV1301	Bacteria	Chloroflexota	Chloroflexia	0.0172476	0	0.0205069	0	0.00766133	0.036379	0	0.0109053	0	0.00969826	0	0	0	0	0	0	0	0	0	0	0	0	0	0	0	0	0	0	0	0	0	0	0	0	0	0	0	0.0144613	0.0134101	0	0	0.0153461	0	0.0189989	0	0
ASV1302	Bacteria	Pseudomonadota	Alphaproteobacteria	0.0106139	0	0.00136713	0.00301141	0.00218895	0	0.0108075	0.000991395	0	0.00121228	0.00379759	0.00562852	0	0	0.0102428	0	0	0.00651105	0	0.00238152	0	0.0216998	0.0339048	0.0105796	0.00137314	0	0.00314946	0	0.000979614	0	0	0	0	0	0.00343399	0	0.00341693	0	0.00111751	0.0185378	0.00322357	0.00127884	0.0463755	0.0207261	0	0
ASV1303	Bacteria	Pseudomonadota	Unclassified Pseudomonadota	0	0.0281291	0	0	0	0	0	0	0	0	0	0	0	0	0	0	0	0	0	0	0	0	0	0	0	0	0	0	0	0.0495324	0	0	0	0	0	0	0	0	0.0402302	0	0	0.0358075	0	0	0	0
ASV1304	Bacteria	Chloroflexota	Chloroflexia	0.0305149	0.00872973	0	0	0.0153227	0.0287202	0.01441	0	0	0.0181842	0	0	0	0	0	0	0	0	0.0246323	0	0	0.0241109	0.0169524	0	0	0	0	0	0	0	0	0	0.0193251	0	0	0	0	0	0	0	0	0	0	0	0	0
ASV1305	Bacteria	Verrucomicrobiota	Unclassified Verrucomicrobiota	0.00928715	0.0223093	0	0	0.00547238	0.0134028	0.01441	0	0	0.00969826	0	0	0	0	0	0	0	0	0	0	0	0	0.0105952	0	0.00411941	0.0102094	0	0	0.0117554	0	0	0	0.0193251	0	0	0	0	0	0.0111751	0	0	0.0153461	0	0	0	0
ASV1306	Bacteria	Planctomycetota	Unclassified Planctomycetota	0	0.0387988	0	0	0	0.0191468	0	0	0	0	0	0	0	0	0	0	0	0	0	0.0214337	0	0	0	0	0	0	0	0	0	0	0	0	0	0	0.0400632	0	0	0	0.0257026	0	0	0	0	0	0	0
ASV1307	Bacteria	Candidatus Binatota	Candidatus Binatia	0	0.00872973	0	0	0	0	0	0	0	0	0	0	0	0	0	0	0.0358252	0	0	0	0	0	0	0	0.00137314	0.0226876	0	0	0.00391846	0	0	0	0.0507283	0.0410765	0	0	0	0	0	0	0	0.0281344	0	0	0	0
ASV1308	Bacteria	Chloroflexota	Chloroflexia	0	0	0.010937	0.0105399	0	0	0	0.00495697	0	0	0	0	0	0	0.0327768	0.0439252	0	0	0	0	0	0	0	0	0	0	0.0251957	0	0	0	0	0	0	0	0.0137359	0	0.0119593	0	0.00894005	0	0.0274004	0	0	0.0189989	0	0
ASV1309	Bacteria	Pseudomonadota	Alphaproteobacteria	0	0	0.00410139	0.0120457	0	0	0	0.0237935	0	0	0.00854457	0.0131332	0	0	0	0	0	0	0	0	0	0	0	0	0	0	0	0	0	0	0	0	0	0	0.00457865	0	0.0205016	0	0	0	0	0	0	0.00863588	0	0.0362223
ASV1310	Bacteria	Unclassified Bacteria	Unclassified Bacteria	0	0	0	0.0195742	0	0	0	0	0	0	0	0.0337711	0	0	0	0	0	0	0	0	0	0	0	0	0	0	0	0.0448534	0	0	0	0	0	0	0	0	0.0153762	0	0	0.0486618	0.0177296	0	0	0	0	0
ASV1311	Bacteria	Pseudomonadota	Gammaproteobacteria	0	0	0	0	0.0251729	0	0	0	0	0.0412176	0	0	0	0	0	0	0	0.0406941	0	0	0	0	0	0	0	0	0	0	0	0	0	0	0	0	0	0	0	0.0274765	0	0	0	0.0204614	0	0	0	0
ASV1312	Bacteria	Planctomycetota	Unclassified Planctomycetota	0	0	0	0	0.0087558	0.0229762	0.04323	0	0	0	0.0275325	0	0	0	0.0163884	0	0	0	0	0	0	0.0216998	0	0	0	0	0	0	0	0	0	0	0	0	0	0	0	0	0.0234676	0	0	0	0.0173908	0	0	0
ASV1313	Bacteria	Chloroflexota	Dehalococcoidia	0	0	0	0	0	0	0	0	0	0	0	0	0	0	0	0	0	0	0	0	0	0	0	0	0	0	0	0.0484901	0	0	0	0	0	0	0	0	0	0	0	0	0	0	0	0	0.0294554	0.026563
ASV1314	Bacteria	Candidatus Binatota	Candidatus Binatia	0	0	0	0	0	0	0	0	0	0	0	0	0	0	0	0	0	0	0	0	0	0	0	0	0	0	0	0	0	0	0	0	0	0	0	0	0	0	0	0	0	0	0	0	0.0368192	0.101422
ASV1315	Bacteria	Pseudomonadota	Unclassified Pseudomonadota	0	0	0	0	0	0	0	0.0148709	0	0	0	0.0206379	0	0	0	0	0	0	0	0	0	0	0	0	0	0	0	0.0254573	0	0	0	0	0	0	0	0	0	0	0	0	0	0	0	0	0.0210396	0
ASV1316	Bacteria	Pseudomonadota	Unclassified Pseudomonadota	0.0159208	0	0	0	0	0	0	0	0	0	0	0	0	0	0	0	0	0	0	0	0	0	0	0	0	0.0306282	0	0	0.0754303	0	0	0	0	0	0	0	0	0	0	0	0	0	0	0	0	0
ASV1317	Bacteria	Pseudomonadota	Deltaproteobacteria	0.0145941	0.0232793	0	0	0.00656685	0	0.0180125	0	0	0	0	0	0	0	0	0	0	0.00813882	0	0	0	0	0	0	0.0151045	0	0	0	0	0	0	0.00920037	0	0.0164306	0.00686797	0	0	0.00867679	0.00894005	0	0	0.0140672	0	0	0	0
ASV1318	Bacteria	Pseudomonadota	Gammaproteobacteria	0.00265347	0.00484985	0.00136713	0	0	0.00957341	0.0108075	0	0	0.00484913	0.000949397	0	0	0.00973836	0.018437	0	0.00477669	0	0.00703779	0	0	0.00241109	0.0042381	0	0.00137314	0	0.017322	0	0	0	0	0.00230009	0.0507283	0.0115014	0.00114466	0.0480894	0	0	0.00670503	0.0185378	0	0.00383651	0	0	0	0
ASV1319	Bacteria	Chloroflexota	Chloroflexia	0	0.0252192	0.0164055	0	0	0	0	0	0	0.016972	0	0	0	0	0	0	0	0	0.0281512	0	0	0	0	0	0	0	0.0220462	0	0	0	0	0	0	0	0.0194593	0	0	0	0.0279376	0	0	0	0	0	0	0
ASV1320	Bacteria	Acidobacteriota	Vicinamibacteria	0	0	0.0246083	0	0	0	0	0.0138795	0	0	0	0.0206379	0	0	0.0286797	0	0	0	0	0	0	0	0.0190714	0	0	0	0.0330693	0	0	0	0	0	0	0	0	0	0.0136677	0	0	0.0278067	0	0	0.0260862	0	0	0
ASV1321	Bacteria	Deferribacterota	Deferribacteres	0	0	0.00410139	0.0135514	0	0	0.0126088	0.0148709	0	0	0.00759518	0.0168856	0	0	0.0081942	0.0131775	0	0	0	0	0	0	0	0.0193959	0	0	0.00944837	0.00606127	0	0	0	0	0	0	0.00457865	0.0258943	0	0	0	0	0.00483536	0	0	0.0103631	0.0168317	0
ASV1322	Bacteria	Chloroflexota	Dehalococcoidia	0	0	0	0	0.0142282	0	0	0	0	0	0	0	0	0	0	0	0	0	0	0	0.00889271	0	0	0	0	0.0385689	0	0	0.00979614	0.0138691	0.0138164	0.0149506	0	0.00985837	0	0	0	0.0274765	0	0	0	0	0	0	0	0
ASV1323	Bacteria	Chloroflexota	Chloroflexia	0	0	0	0	0	0	0	0	0	0	0	0	0	0	0	0	0	0	0	0	0	0	0	0	0	0	0	0.0363676	0	0	0	0	0	0	0	0	0	0	0	0	0	0	0	0	0.0357673	0.0579556
ASV1324	Bacteria	Verrucomicrobiota	Unclassified Verrucomicrobiota	0	0	0	0	0	0	0	0	0	0.0763738	0	0	0	0	0	0	0	0.0569717	0	0	0	0	0	0	0	0	0.0283451	0	0	0	0	0	0	0	0	0	0	0	0	0	0	0	0	0	0	0
ASV1325	Bacteria	Planctomycetota	Planctomycetia	0	0	0	0	0	0	0	0.0247849	0	0	0	0	0	0	0	0	0	0	0	0	0	0	0	0	0	0	0	0	0	0	0	0	0	0	0	0	0	0	0	0	0	0	0	0	0.050495	0
ASV1326	Bacteria	Bacillota	Bacilli	0	0	0	0	0	0	0.207144	0	0	0	0	0	0	0	0	0	0	0	0	0	0	0	0	0	0	0	0	0	0	0	0	0	0	0	0	0	0	0	0	0	0	0	0	0	0	0
ASV1327	Archaea	Methanobacteriota	Unclassified Methanobacteriota	0	0	0	0	0	0	0	0.0465956	0	0	0	0	0	0	0	0	0	0	0	0	0	0	0	0	0	0	0.107082	0	0	0	0	0	0	0	0	0	0	0	0	0	0	0	0	0	0	0
ASV1328	Bacteria	Chloroflexota	Chloroflexia	0	0	0	0	0	0	0	0	0	0.00969826	0.0113928	0	0	0	0.0389225	0.0263551	0	0	0	0.0142891	0	0	0	0	0	0.0102094	0	0	0.0068573	0	0.0103623	0.00575023	0	0	0	0	0.0187931	0.0101229	0.0134101	0	0	0.00895186	0	0	0	0
ASV1329	Bacteria	Unclassified Bacteria	Unclassified Bacteria	0	0.0106697	0	0	0.00328343	0.0248909	0	0	0.0174169	0.0133351	0	0	0	0	0	0	0	0.027672	0	0	0	0	0	0	0	0	0	0	0	0	0	0	0	0	0.0125913	0	0	0	0.0178801	0	0	0.0140672	0.0318831	0	0	0
ASV1330	Bacteria	Unclassified Bacteria	Unclassified Bacteria	0	0.0261892	0	0	0	0.0804166	0	0	0	0	0	0	0	0	0	0	0	0	0	0	0	0	0	0.0793469	0	0	0	0	0	0	0	0	0	0	0	0	0	0	0	0	0	0	0	0	0	0
ASV1331	Unknown	Unknown	Unknown	0	0.00484985	0.0095699	0	0.00328343	0	0.01441	0	0	0	0	0	0	0	0	0	0	0	0.0140756	0	0	0	0	0.0158694	0	0	0.0204715	0	0	0	0	0	0	0	0.0114466	0	0	0	0.0156451	0	0	0.0127884	0.0231877	0.039725	0	0
ASV1332	Bacteria	Planctomycetota	Unclassified Planctomycetota	0	0	0.0806606	0	0	0	0	0	0	0	0	0	0	0	0	0	0	0	0.0598212	0	0	0	0	0	0	0	0	0	0	0	0	0	0	0	0	0	0.0478371	0	0	0	0	0	0	0.0172718	0	0
ASV1333	Bacteria	Unclassified Bacteria	Unclassified Bacteria	0	0	0.0136713	0	0	0	0	0	0	0	0	0.0506567	0	0	0	0	0	0	0	0	0	0	0	0	0	0	0	0.0472779	0	0	0	0	0	0	0	0	0.025627	0	0	0	0	0	0	0	0.0136757	0
ASV1334	Bacteria	Pseudomonadota	Gammaproteobacteria	0	0	0	0	0	0	0	0.0128881	0	0	0	0	0	0	0	0.0527102	0	0.0390663	0	0	0	0.0144665	0	0	0	0	0	0	0.0186127	0	0	0	0	0	0	0	0	0	0	0	0	0.0255768	0	0.0345435	0	0
ASV1335	Bacteria	Pseudomonadota	Unclassified Pseudomonadota	0	0	0	0	0.0164171	0	0	0	0	0	0	0	0	0	0	0	0	0	0	0	0.0133391	0	0	0	0	0.0260907	0	0	0.0176331	0.019813	0.0224517	0.0149506	0.0314032	0	0	0	0	0	0	0	0	0	0	0	0	0
ASV1336	Bacteria	Unclassified Bacteria	Unclassified Bacteria	0	0	0.0396467	0	0	0.0287202	0.0306213	0	0	0	0	0	0	0	0	0	0	0	0	0	0	0	0	0	0	0	0.0220462	0	0	0	0	0	0	0	0	0	0	0	0.0424652	0	0	0	0	0	0	0
ASV1337	Bacteria	Verrucomicrobiota	Verrucomicrobiia	0	0	0.0259754	0	0	0.0191468	0	0.00594837	0	0	0.0151904	0	0	0	0	0	0	0	0	0	0	0	0	0.0299755	0	0	0.0157473	0.00727352	0	0	0	0	0	0	0	0.0184959	0.0153762	0	0	0	0.0177296	0	0	0.0069087	0	0
ASV1338	Bacteria	Chloroflexota	Chloroflexia	0	0	0	0	0.020795	0	0	0	0	0	0	0	0	0	0	0	0.0358252	0	0	0	0	0	0	0	0	0.032897	0	0	0.0137146	0	0.0224517	0	0	0.0377904	0	0	0	0	0	0	0	0	0	0	0	0
ASV1339	Bacteria	Unclassified Bacteria	Unclassified Bacteria	0	0	0	0	0	0	0	0	0	0	0	0	0	0	0	0	0	0	0	0	0	0	0	0	0.0398209	0	0	0	0.0284088	0.0237756	0.02936	0	0	0.0427196	0	0	0	0	0	0	0	0	0	0	0	0
ASV1340	Bacteria	Chloroflexota	Chloroflexia	0	0	0	0	0	0	0	0	0	0	0	0	0	0	0	0	0	0	0	0	0	0	0	0	0	0	0	0.0290941	0	0	0	0	0	0	0	0	0.0341693	0	0	0	0	0	0	0	0.0399752	0
ASV1341	Bacteria	Chloroflexota	Dehalococcoidia	0	0.0223093	0	0	0	0.0134028	0.0180125	0	0.0142502	0	0	0	0	0	0	0	0	0.0179054	0	0	0	0	0	0	0	0	0.017322	0.00727352	0	0	0	0	0	0	0.0217486	0	0	0	0.0189976	0	0	0	0	0	0	0
ASV1342	Bacteria	Unclassified Bacteria	Unclassified Bacteria	0	0.0174595	0	0	0	0.0402083	0	0	0	0	0	0	0	0.025969	0	0	0	0	0	0	0.00296424	0.0578662	0	0	0.00411941	0	0	0	0	0	0.00690822	0.00345014	0	0	0	0	0	0	0.0134101	0	0.0257886	0.00127884	0	0	0	0
ASV1343	Bacteria	Chloroflexota	Dehalococcoidia	0	0.0116396	0	0.0105399	0.00328343	0.0134028	0	0	0	0	0.00949397	0	0	0	0	0	0	0	0	0.0214337	0	0	0	0.0299755	0	0	0.0220462	0	0	0	0	0.00575023	0	0	0.00686797	0.0295935	0	0	0	0	0.0128943	0.00767303	0	0	0	0
ASV1344	Bacteria	Chloroflexota	Chloroflexia	0	0	0	0.0195742	0	0	0	0.0138795	0	0	0.014241	0	0	0	0.0204855	0.0307476	0	0	0	0	0	0	0	0	0	0	0	0	0	0	0	0	0	0	0	0	0.0290439	0	0	0	0.0306239	0	0	0.029362	0	0
ASV1345	Bacteria	Pseudomonadota	Deltaproteobacteria	0	0	0	0	0	0	0	0	0	0	0	0	0	0	0	0	0	0	0	0	0	0	0	0	0	0	0	0.0121225	0	0	0	0	0	0	0	0	0	0	0	0	0	0	0	0	0.0262995	0.0313926
ASV1346	Bacteria	Unclassified Bacteria	Unclassified Bacteria	0	0	0	0	0	0	0	0	0	0	0	0	0	0	0	0	0	0	0	0	0	0	0	0	0	0	0	0.00848577	0	0	0	0	0	0	0	0	0	0	0	0	0	0	0	0	0.0094678	0.0965927
ASV1347	Bacteria	Planctomycetota	Planctomycetia	0.019901	0	0	0	0.0164171	0	0	0	0.0174169	0	0	0	0	0	0	0	0.0191068	0	0	0	0	0	0	0	0.0178508	0.00453751	0	0	0	0.0178317	0	0.0115005	0.0193251	0	0	0	0	0.0101229	0	0	0	0.0140672	0	0	0	0
ASV1348	Bacteria	Pseudomonadota	Alphaproteobacteria	0	0.0203694	0	0	0	0	0	0	0	0.0290948	0	0	0	0	0	0	0	0	0	0	0	0	0	0	0.0274627	0	0	0	0	0	0	0.0345014	0	0	0	0	0	0	0.0178801	0	0	0	0	0	0	0
ASV1349	Bacteria	Planctomycetota	Unclassified Planctomycetota	0	0.0106697	0	0	0.0109448	0.00382936	0	0	0.00791678	0.0133351	0	0	0	0.0162306	0	0	0	0	0	0	0	0.0168776	0	0	0	0.0158813	0	0	0	0	0	0.0103504	0	0	0.0137359	0	0	0.0144613	0.0167626	0	0	0	0	0	0	0
ASV1350	Bacteria	Actinomycetota	Unclassified Actinomycetota	0	0	0.00546852	0	0	0	0	0.0128881	0	0	0.00759518	0	0	0	0	0	0	0	0	0	0	0	0	0	0.00686568	0.00680627	0	0.0193961	0	0	0	0	0.0773003	0	0	0	0.0187931	0	0	0	0	0.0204614	0	0	0	0
ASV1351	Bacteria	Unclassified Bacteria	Unclassified Bacteria	0	0	0.00410139	0	0	0.0325496	0.036025	0	0	0.0157597	0	0	0	0	0.0512138	0	0	0	0	0	0	0	0	0	0	0	0	0	0	0	0	0	0	0.0246459	0	0	0	0	0	0	0	0	0	0.0310892	0	0
ASV1352	Bacteria	Verrucomicrobiota	Verrucomicrobiia	0	0	0	0	0	0	0	0	0	0	0.0332289	0	0	0	0	0	0	0	0	0	0	0	0	0	0	0	0.0409429	0	0	0	0	0	0	0	0	0	0.0410032	0	0	0.0602479	0	0	0	0	0	0
ASV1353	Bacteria	Pseudomonadota	Unclassified Pseudomonadota	0.00663368	0.0184294	0	0	0	0	0	0	0	0	0	0	0.0232531	0.0324612	0	0	0.0167184	0.0113943	0	0	0	0	0	0.0105796	0.0192239	0	0	0	0	0	0	0	0	0.0180737	0.0125913	0	0	0.00867679	0	0.0254895	0	0	0	0	0	0
ASV1354	Bacteria	Pseudomonadota	Alphaproteobacteria	0	0.0135796	0	0	0	0.0210615	0	0	0	0.00484913	0	0	0	0	0	0	0	0.00976658	0	0	0	0	0	0	0.0109851	0	0	0.0254573	0	0	0	0	0	0	0.0263272	0	0.0187931	0	0.0145276	0	0	0	0	0	0	0
ASV1355	Bacteria	Verrucomicrobiota	Opitutia	0.0106139	0.00387988	0.0095699	0	0.00218895	0.0229762	0.0126088	0	0	0	0	0	0	0	0.00614565	0	0	0.0146499	0.0105567	0.00952608	0.00592847	0	0.0105952	0.00705306	0	0	0	0	0.00489807	0	0	0.00920037	0	0.00985837	0.00572331	0	0	0.00578453	0.00558753	0	0	0.00639419	0	0	0	0
ASV1356	Bacteria	Spirochaetota	Spirochaetia	0	0	0.0123042	0	0	0	0	0.0178451	0	0	0	0	0	0	0	0	0	0	0	0	0	0	0	0	0	0	0	0.0290941	0	0	0	0	0	0	0	0	0.0273355	0	0	0.030124	0	0	0	0	0.0168317	0
ASV1357	Archaea	Methanobacteriota	Unclassified Methanobacteriota	0	0	0	0.0376427	0	0	0.00900625	0	0	0	0.0199373	0	0	0	0.0225341	0	0	0	0	0.0166706	0	0	0	0	0	0	0	0.0242451	0	0	0	0	0	0	0	0	0	0	0	0	0	0	0	0	0	0
ASV1358	Bacteria	Acidobacteriota	Unclassified Acidobacteriota	0	0	0	0.025597	0	0	0	0.0188365	0.0158336	0	0.0246843	0	0	0	0	0	0	0	0	0	0	0	0	0	0	0	0	0	0	0	0	0	0	0	0	0	0	0	0	0	0	0	0	0	0.0157797	0
ASV1359	Bacteria	Chloroflexota	Chloroflexia	0	0	0	0	0	0	0	0	0	0	0	0.0225141	0	0	0	0	0	0	0	0	0	0	0	0	0	0	0	0.0254573	0	0	0	0	0	0	0	0	0.0187931	0	0	0	0	0	0	0	0.0262995	0.0289778
ASV1360	Bacteria	Actinomycetota	Acidimicrobiia	0.00796041	0.00872973	0	0.0165628	0	0	0	0	0	0	0	0	0	0.0162306	0	0	0.0214951	0	0	0	0	0	0	0.00705306	0.00823882	0.0136125	0	0	0.0068573	0	0	0.00460019	0	0	0	0	0	0.0115691	0	0	0	0	0	0	0.0136757	0.00965927
ASV1361	Bacteria	Pseudomonadota	Deltaproteobacteria	0	0.0145495	0.0123042	0	0	0.00765873	0.0450313	0	0	0.0133351	0	0	0	0.0194767	0	0	0	0.0179054	0	0	0	0	0.0127143	0	0	0	0	0	0	0	0	0	0	0	0.0125913	0	0	0	0.0122926	0	0	0	0	0	0	0
ASV1362	Unknown	Unknown	Unknown	0	0	0.00546852	0.0165628	0	0.00765873	0	0.00495697	0	0.0109105	0.0161398	0.00750469	0	0	0	0.0263551	0.00477669	0	0	0	0	0.00723327	0	0.00528979	0	0	0.0236209	0	0	0	0	0	0	0	0.00801264	0	0.0051254	0	0.0134101	0	0	0	0	0.0069087	0	0
ASV1363	Bacteria	Gemmatimonadota	Gemmatimonadia	0	0	0	0.0346313	0	0	0	0.00991395	0	0	0.0208867	0	0	0	0	0.0571027	0	0	0	0	0	0	0	0	0	0	0.034644	0	0	0	0	0	0	0	0	0	0	0	0	0.0440273	0	0	0	0	0	0
ASV1364	Bacteria	Pseudomonadota	Deltaproteobacteria	0	0	0	0	0	0	0	0	0	0	0	0	0	0	0	0	0	0	0	0	0	0	0	0	0.149672	0	0	0	0	0	0	0	0	0	0	0	0	0	0	0	0	0	0	0	0	0
ASV1365	Bacteria	Pseudomonadota	Deltaproteobacteria	0	0	0	0	0	0	0	0	0	0	0	0	0	0	0	0	0	0	0	0	0	0	0	0	0	0	0	0	0	0	0	0	0	0	0	0.403211	0	0	0	0	0	0	0	0	0	0
ASV1366	Bacteria	Planctomycetota	Unclassified Planctomycetota	0	0	0	0	0	0	0	0	0	0	0	0	0	0	0	0	0	0	0	0	0	0	0	0	0	0	0	0	0	0	0	0	0	0	0	0	0.0119593	0	0	0	0	0	0	0	0	0.0603704
ASV1367	Bacteria	Chloroflexota	Chloroflexia	0.0265347	0	0	0	0.0350232	0	0	0	0	0	0	0	0	0	0	0	0	0	0	0	0	0	0	0	0	0	0	0	0	0	0.031087	0	0	0.0624363	0	0	0	0	0	0	0	0	0	0	0	0
ASV1368	Bacteria	Planctomycetota	Unclassified Planctomycetota	0.0119406	0.0232793	0	0	0.0186061	0	0	0	0	0	0	0	0	0	0	0	0	0	0	0	0.0103748	0	0	0	0.0151045	0.0170157	0	0	0.0244904	0	0	0	0	0	0	0	0	0	0	0	0	0	0	0	0	0
ASV1369	Bacteria	Pseudomonadota	Deltaproteobacteria	0.0119406	0	0	0	0	0	0	0	0	0	0	0	0	0	0	0	0	0	0	0	0	0	0	0	0	0	0	0	0	0	0	0.0586524	0	0.0788669	0	0	0	0	0	0	0	0	0	0	0	0
ASV1370	Bacteria	Pseudomonadota	Oligoflexia	0	0	0.010937	0.0165628	0	0.0153175	0	0.0118967	0	0	0.0113928	0	0	0	0.0225341	0	0	0	0	0.0214337	0	0	0.0148333	0	0	0	0.0220462	0	0	0	0	0	0	0	0	0	0.00683387	0	0	0	0.0193414	0	0	0	0	0
ASV1371	Bacteria	Planctomycetota	Planctomycetia	0	0	0	0.0165628	0	0	0	0.0218107	0	0	0	0.0300188	0	0	0	0	0	0	0	0	0	0	0	0	0	0	0	0.0339431	0	0	0	0	0	0	0	0	0	0	0	0	0	0	0	0	0.0262995	0.0144889
ASV1372	Bacteria	Acidobacteriota	Unclassified Acidobacteriota	0	0	0	0.0150571	0	0	0	0.0118967	0	0.0230334	0.00949397	0.0262664	0	0	0	0	0	0	0	0	0	0	0	0.0317388	0	0	0	0	0	0	0	0	0	0	0.0286166	0	0	0	0	0	0	0	0	0	0	0
ASV1373	Bacteria	Acidobacteriota	Unclassified Acidobacteriota	0	0	0	0	0	0	0	0.0257763	0	0	0	0	0	0	0	0	0	0	0	0	0	0	0	0.0105796	0	0	0	0.0351554	0	0	0	0	0	0	0	0	0.0205016	0	0	0.0185378	0.0161179	0	0	0.0138174	0.0094678	0
ASV1374	Bacteria	Acidobacteriota	Terriglobia	0	0	0	0.0120457	0	0	0	0	0	0	0.00569638	0	0	0	0	0	0	0	0	0	0	0	0	0.0193959	0	0	0	0.0193961	0	0	0	0	0	0	0	0	0.00854234	0	0	0	0	0	0	0	0.0126237	0.0193185
ASV1375	Bacteria	Chloroflexota	Chloroflexia	0	0	0	0.00903424	0	0.0134028	0	0.0158623	0	0.0133351	0.00949397	0.0131332	0	0	0.0327768	0	0	0	0	0	0	0	0	0.0176326	0	0	0.0110231	0	0	0	0	0	0	0	0	0	0.00854234	0	0	0	0.00483536	0	0	0.0155446	0	0
ASV1376	Bacteria	Chloroflexota	Dehalococcoidia	0	0	0	0	0	0	0	0.0118967	0	0	0.0170891	0	0	0	0	0	0	0	0	0	0	0	0	0	0	0	0	0.0278818	0	0	0	0	0	0	0	0	0	0	0	0	0	0	0	0	0.0357673	0
ASV1377	Bacteria	Chloroflexota	Dehalococcoidia	0	0	0	0	0	0	0	0	0	0	0	0	0	0	0	0	0	0	0	0	0	0	0	0	0	0	0	0.0290941	0	0	0	0	0	0	0	0	0.0102508	0	0	0	0	0	0	0	0.0347153	0
ASV1378	Bacteria	Bacteroidota	Flavobacteriia	0	0	0	0	0	0	0	0	0	0	0	0	0	0	0	0	0	0	0	0	0	0	0	0	0	0	0	0	0	0	0	0	0	0	0	0	0	0	0	0	0	0	0	0	0	0.0676149
ASV1379	Bacteria	Planctomycetota	Unclassified Planctomycetota	0.0159208	0.00775976	0	0	0.00985028	0.00957341	0.02882	0	0	0.0072737	0	0	0	0	0	0	0	0	0	0	0	0.0289331	0	0	0.0137314	0.00907503	0	0	0	0	0	0.00920037	0	0	0	0	0	0	0.0134101	0	0	0	0	0	0	0
ASV1380	Bacteria	Planctomycetota	Planctomycetia	0.0145941	0	0	0	0.0197006	0	0	0	0	0	0	0	0	0	0	0	0	0	0	0	0.0148212	0	0	0	0.0192239	0.0192844	0	0	0.0107758	0	0	0	0.0289876	0	0	0	0	0.0187997	0	0	0	0	0	0	0	0
ASV1381	Bacteria	Pseudomonadota	Gammaproteobacteria	0	0.102817	0	0	0	0	0	0	0	0	0	0	0	0	0	0	0	0	0	0	0	0	0	0	0	0	0	0	0	0	0	0	0	0	0	0	0	0	0	0	0	0	0	0	0	0
ASV1382	Bacteria	Pseudomonadota	Deltaproteobacteria	0	0.0164895	0	0	0	0	0	0	0	0.0157597	0.00949397	0	0	0	0	0	0.0191068	0.0227887	0	0	0	0	0	0.0158694	0	0.0113438	0	0	0.0107758	0	0	0	0	0	0	0	0.00683387	0	0	0.0231723	0	0	0	0	0	0
ASV1383	Bacteria	Unclassified Bacteria	Unclassified Bacteria	0	0	0	0	0	0	0.00540375	0.0128881	0	0	0.0132916	0	0	0	0.0122913	0	0	0	0	0.0238152	0	0.0120555	0.0169524	0.0123428	0	0	0	0.00727352	0	0	0	0	0	0	0.00686797	0.0295935	0.00854234	0	0.00782254	0	0.0128943	0	0	0	0	0
ASV1384	Bacteria	Planctomycetota	Unclassified Planctomycetota	0.0106139	0.0184294	0	0	0	0	0.021615	0	0	0.0266702	0	0	0	0	0	0	0	0	0	0	0	0.0168776	0	0	0	0	0	0	0	0	0	0	0	0	0.0137359	0	0	0	0.0134101	0	0	0	0.0376801	0	0	0
ASV1385	Bacteria	Pseudomonadota	Deltaproteobacteria	0	0.101847	0	0	0	0	0	0	0	0	0	0	0	0	0	0	0	0	0	0	0	0	0	0	0	0	0	0	0	0	0	0	0	0	0	0	0	0	0	0	0	0	0	0	0	0
ASV1386	Archaea	Thermoproteota	Unclassified Thermoproteota	0	0.00387988	0	0	0.0109448	0	0	0	0	0	0	0	0	0	0	0	0	0.00325553	0	0	0.0118569	0	0	0	0	0.0102094	0	0	0.0176331	0.0277382	0.0172706	0.0126505	0	0.00492918	0	0	0	0.0144613	0	0	0	0.00767303	0	0	0	0
ASV1387	Bacteria	Acidobacteriota	Unclassified Acidobacteriota	0	0	0	0	0.0197006	0	0	0	0	0	0	0	0	0	0	0	0	0	0	0	0	0	0	0	0	0	0	0	0	0	0.0569928	0.0218509	0.0507283	0	0	0	0	0	0	0	0	0.0179037	0	0	0	0
ASV1388	Bacteria	Actinomycetota	Acidimicrobiia	0	0	0	0	0.0043779	0.00957341	0	0	0	0	0	0	0	0	0	0	0	0	0	0	0	0	0	0	0	0	0	0.0230328	0	0	0	0	0	0	0	0	0	0	0.0122926	0.0370757	0	0.0179037	0	0	0.00525989	0
ASV1389	Bacteria	Chloroflexota	Chloroflexia	0	0	0.0273426	0	0	0	0	0	0	0	0.0161398	0	0	0	0.0368739	0	0	0.0244164	0.0774157	0	0	0	0	0	0	0	0	0	0	0	0	0	0	0	0	0	0	0	0	0	0	0	0.0376801	0	0	0
ASV1390	Bacteria	Pseudomonadota	Unclassified Pseudomonadota	0.0384753	0	0	0	0	0	0	0	0	0.0327316	0	0	0	0	0	0	0	0	0	0	0	0	0	0	0	0	0	0	0	0	0.0397223	0	0.0628065	0	0	0	0	0	0	0	0	0	0	0	0	0
ASV1391	Bacteria	Planctomycetota	Unclassified Planctomycetota	0.0145941	0	0	0	0.0175116	0	0	0	0.022167	0	0	0	0	0	0	0	0	0	0	0	0	0	0	0	0.020597	0	0	0	0	0	0	0.0172507	0	0	0	0	0	0.0260304	0	0	0	0.0191826	0	0	0	0
ASV1392	Bacteria	Pseudomonadota	Gammaproteobacteria	0	0.0290991	0	0	0	0	0	0	0.0300838	0	0	0	0	0	0	0	0	0	0	0	0	0.026522	0	0	0	0	0	0	0	0	0.0362682	0	0	0	0	0	0	0	0.0257026	0	0	0	0	0	0	0
ASV1393	Bacteria	Planctomycetota	Unclassified Planctomycetota	0	0.0252192	0	0	0.0142282	0.0172321	0.021615	0	0	0	0	0	0	0	0	0	0	0.0179054	0.0281512	0	0	0.0409885	0	0	0.0109851	0	0	0	0	0	0	0	0	0	0	0	0	0	0	0	0	0	0	0	0	0
ASV1394	Bacteria	Pseudomonadota	Alphaproteobacteria	0	0.00484985	0	0	0	0	0	0	0.00791678	0	0	0	0	0	0	0	0	0	0	0	0.00889271	0	0	0	0.0137314	0.0124782	0.0141726	0	0	0	0	0.0103504	0	0.0213598	0	0	0	0.0159074	0.0145276	0	0	0.0153461	0	0	0	0
ASV1395	Bacteria	Pseudomonadota	Deltaproteobacteria	0	0	0.0164055	0	0	0	0	0	0	0	0	0.0225141	0	0	0	0	0.0143301	0	0	0.0119076	0	0	0	0	0	0	0	0	0.00881653	0	0	0	0	0	0	0.0480894	0.0341693	0	0	0	0.0177296	0	0.0173908	0.0172718	0	0
ASV1396	Bacteria	Chloroflexota	Chloroflexia	0	0	0	0	0	0	0.021615	0	0	0.0290948	0	0	0	0	0	0	0	0	0	0.0452489	0	0	0.0317857	0	0	0	0	0	0	0	0	0	0	0	0	0	0	0	0.0223501	0	0	0.0179037	0	0	0	0
ASV1397	Bacteria	Chloroflexota	Dehalococcoidia	0	0	0	0	0	0	0	0.0198279	0	0	0.0104434	0.0243902	0	0	0	0	0	0	0	0	0	0	0	0	0	0	0.0220462	0.0109103	0	0	0	0	0	0	0.0125913	0	0.0187931	0	0	0	0	0	0	0	0.0157797	0
ASV1398	Bacteria	Unclassified Bacteria	Unclassified Bacteria	0	0	0	0	0	0	0	0	0.0427506	0	0	0	0	0	0	0	0	0	0	0	0.0489099	0	0	0	0	0	0	0	0	0	0.0673552	0	0	0	0	0	0	0	0	0.0115861	0	0	0	0	0	0
ASV1399	Bacteria	Pseudomonadota	Gammaproteobacteria	0	0	0	0	0	0	0	0	0	0	0.0398747	0	0	0	0	0	0	0	0	0	0	0	0	0	0	0	0	0	0	0	0	0	0	0	0	0	0	0	0	0	0	0	0	0	0	0.149719
ASV1400	Bacteria	Planctomycetota	Unclassified Planctomycetota	0	0.0358889	0	0	0	0	0	0	0	0	0.0265831	0	0	0	0	0	0	0.0260442	0	0.0523934	0	0	0	0	0	0	0	0	0	0	0	0	0	0	0	0	0	0	0	0	0	0	0	0	0	0
ASV1401	Bacteria	Unclassified Bacteria	Unclassified Bacteria	0	0.0116396	0	0	0.00547238	0.0172321	0.021615	0	0.00791678	0	0.0180385	0	0	0	0	0	0	0	0	0.0142891	0	0	0	0	0.0109851	0.00794065	0	0	0	0	0	0	0	0	0.0171699	0	0	0	0	0	0	0.00639419	0	0	0	0
ASV1402	Bacteria	Planctomycetota	Unclassified Planctomycetota	0	0	0.0218741	0	0	0.0172321	0	0	0	0.0218211	0.0189879	0	0	0	0	0	0	0	0	0	0	0	0	0	0	0	0	0	0	0	0	0	0.026572	0.0197167	0.0114466	0	0	0	0.00782254	0	0	0	0	0	0	0
ASV1403	Bacteria	Pseudomonadota	Deltaproteobacteria	0	0	0	0	0	0.0382936	0	0	0	0	0	0	0	0	0	0	0	0.0390663	0	0	0	0	0	0	0	0	0	0	0	0	0	0	0	0	0.0297612	0	0	0	0.0368777	0	0	0	0	0	0	0
ASV1404	Bacteria	Pseudomonadota	Alphaproteobacteria	0	0	0	0	0	0	0	0	0	0	0	0	0	0.0227228	0	0	0	0	0	0	0	0.0216998	0	0	0	0	0	0	0	0	0	0	0	0	0	0	0	0	0	0.0602479	0	0	0	0.105358	0	0
ASV1405	Bacteria	Gemmatimonadota	Gemmatimonadia	0	0	0.053318	0	0.0273619	0	0	0	0	0	0	0	0	0	0	0	0	0	0	0	0	0	0	0	0	0	0	0	0	0	0	0	0	0	0	0	0	0	0.0134101	0	0	0.0345286	0	0	0	0
ASV1406	Bacteria	Pseudomonadota	Gammaproteobacteria	0	0	0	0	0	0	0	0	0	0	0	0	0	0	0	0	0	0	0	0	0	0	0	0	0	0.0397032	0	0	0.038205	0	0	0.0149506	0	0	0	0	0	0	0	0	0	0.0204614	0	0	0	0
ASV1407	Bacteria	Pseudomonadota	Deltaproteobacteria	0	0.0203694	0.00410139	0	0	0	0.0126088	0	0	0.0242457	0	0	0	0	0.0102428	0	0	0.0292997	0	0	0	0	0	0	0	0	0	0	0	0	0	0	0	0	0	0	0.00683387	0	0.0189976	0	0.0112825	0	0	0	0	0
ASV1408	Bacteria	Unclassified Bacteria	Unclassified Bacteria	0	0.00775976	0.00820277	0	0.00656685	0.0114881	0.0252175	0	0	0.0121228	0.00664578	0	0	0	0	0	0	0.00813882	0	0	0	0	0.0105952	0	0.00549254	0	0	0	0	0	0	0.00805033	0	0.00657225	0.0137359	0	0	0	0	0	0	0	0	0.0138174	0	0
ASV1409	Bacteria	Candidatus Poribacteriota	Unclassified candidatus Poribacteriota	0	0	0.0177727	0	0	0	0.0306213	0	0	0.0218211	0.0151904	0	0	0	0	0	0	0.0113943	0	0.0142891	0	0	0.0148333	0	0	0	0	0	0	0	0	0	0	0	0	0	0	0	0.0145276	0.0115861	0	0	0	0	0	0
ASV1410	Bacteria	Planctomycetota	Unclassified Planctomycetota	0	0	0	0.0707682	0	0	0	0.0148709	0	0	0	0	0	0	0	0	0	0	0	0	0	0	0	0	0	0	0	0	0	0	0	0	0	0	0	0	0	0	0	0	0	0	0	0.0224533	0.0284034	0
ASV1411	Bacteria	Unclassified Bacteria	Unclassified Bacteria	0	0	0	0.0647454	0	0	0	0	0	0	0	0	0	0	0	0	0	0.0130221	0	0	0	0	0	0	0	0	0	0	0	0.033682	0	0	0	0	0	0	0	0	0	0.00695169	0	0	0	0.0535424	0	0
ASV1412	Bacteria	Chloroflexota	Dehalococcoidia	0	0	0	0	0	0.0134028	0.021615	0	0	0.00969826	0	0	0	0	0.018437	0	0	0	0.0281512	0	0	0.0216998	0.0211905	0.0282122	0	0	0.0125978	0	0	0	0	0	0	0	0	0	0	0	0.00782254	0	0	0.0102307	0	0	0	0
ASV1413	Bacteria	Unclassified Bacteria	Unclassified Bacteria	0	0	0	0	0	0	0	0.0346988	0	0	0.0227855	0.0225141	0	0	0.0348254	0	0	0	0	0	0	0	0	0	0	0	0	0	0	0	0	0	0	0	0	0	0.0239185	0	0	0	0	0	0	0	0	0
ASV1414	Bacteria	Unclassified Bacteria	Unclassified Bacteria	0	0	0	0	0	0	0	0	0	0	0	0	0	0	0	0	0	0	0	0	0	0	0	0	0	0.0363001	0	0	0.0293884	0.0317007	0.0414493	0	0	0	0	0	0	0	0	0	0	0	0	0	0	0
ASV1415	Bacteria	Chloroflexota	Chloroflexia	0	0	0	0	0	0	0	0	0	0	0	0	0	0	0	0	0	0	0	0	0	0	0	0	0	0	0	0	0	0	0	0	0	0	0	0	0	0	0	0	0	0	0	0	0.0757424	0.0724445
ASV1416	Bacteria	Unclassified Bacteria	Unclassified Bacteria	0	0	0	0	0	0	0	0	0	0	0.0180385	0.0150094	0	0	0	0	0	0	0	0	0	0	0	0.0282122	0	0	0	0.0218206	0	0	0	0	0	0	0	0	0	0	0	0	0.0306239	0	0	0	0	0
ASV1417	Bacteria	Unclassified Bacteria	Unclassified Bacteria	0.0212278	0.00678979	0.00820277	0	0	0	0.007205	0	0	0	0	0	0.0174398	0.0129845	0	0	0	0	0	0	0	0	0	0	0	0.0102094	0	0	0.0146942	0.0138691	0.0172706	0.00575023	0	0	0	0	0	0.00867679	0	0	0	0.0115095	0	0	0	0
ASV1418	Bacteria	Unclassified Bacteria	Unclassified Bacteria	0.00530694	0	0	0	0	0	0.0108075	0	0	0.0157597	0	0	0	0.00973836	0	0	0	0	0	0	0.0148212	0	0	0	0.0123582	0.00680627	0	0	0.0068573	0	0	0	0.0144938	0.0197167	0.0148806	0	0	0	0	0	0	0.0153461	0	0	0	0
ASV1419	Bacteria	Pseudomonadota	Gammaproteobacteria	0	0.00775976	0	0	0.0131337	0	0	0	0	0.0157597	0	0	0	0	0	0	0	0	0	0	0	0	0	0	0.0137314	0	0.0283451	0	0	0	0	0	0.0169094	0.00821531	0.0183146	0	0	0.0173536	0	0	0	0	0	0	0	0
ASV1420	Bacteria	Unclassified Bacteria	Unclassified Bacteria	0	0	0	0	0	0	0	0	0	0	0.0237349	0	0	0	0	0	0	0	0	0	0	0	0	0	0	0	0	0	0	0	0	0	0	0	0	0	0	0	0	0	0	0	0	0	0.0368192	0.0120741
ASV1421	Bacteria	Actinomycetota	Unclassified Actinomycetota	0	0	0	0	0	0	0	0	0	0	0.014241	0	0	0	0	0	0	0	0	0	0	0	0	0	0	0	0	0.0339431	0	0	0	0	0	0	0	0	0	0	0	0.0254895	0.0306239	0	0	0	0.0294554	0
[truncated: 7,649 more rows]
[truncated: 2 more columns]

## Sheet: Table S4
Supplementary Table 4. Proportions of eukaryotic ASVs in the Magellan seamounts and adjacent abyssal plains identified by eDNA metabarcoding analysis
[truncated: 4,572 more rows]
[truncated: 2 more columns]
